# Supplementary material for: Core promoter sequence in yeast is a major determinant of expression level
Source: HighWire-hosted journal article supplement (doi:10.1101/gr.188193.114), 2015-05-12
Supplement: Supplemental_Tables.xlsx [file Supplemental_Tables.xlsx]

## Sheet: Supp. Table 1
Our library's 7536 118bp long core promoter variants and their measured activities:
Name	Category	Sequence	Core promoter activity [a.u.]
snR14	Native	ATATAAAAGGAACAGAATATTAGTTAGCTTCATTGTCCAATTACTATTGTTACTTACGTTTAATGCATTTTCTTTTCTTTCACTTCCTTCCTTAATACTCCATCCTTATGCACGGGAA	NaN
TDH3	Native	TTGTAATTCTGTAAATCTATTTCTTAAACTTCTTAAATTCTACTTTTATAGTTAGTCTTTTTTTTAGTTTTAAAACACCAAGAACTTAGTTTCGAATAAACACACATAAACAAACAAA	10.2641
GAL7	Native	TAGCTATGTTCAGTTAGTTTGGCTAGCAAAGATATAAAAGCAGGTCGGAAATATTTATGGGCATTATTATGCAGAGCATCAACATGATAAAAAAAAACAGTTGAATATTCCCTCAAAA	13.1121
CCW12	Native	ATGCTTGATAATCTTTCTTTCCATCCTACATTGTTCTAATTATTCTTATTCTCCTTTATTCTTTCCTAACATACCAAGAAATTAATCTTCTGTCATTCGCTTAAACACTATATCAATA	7.263
ENO2	Native	ATTAATTCTTATTTTGTATCTTTTCTTCCCTTGTCTCAATCTTTTATTTTTATTTTATTTTTCTTTTCTTAGTTTCTTTCATAACACCAAGCAACTAATACTATAACATACAATAATA	11.5786
PDC1	Native	CCTTGCAATCAGATTTGGGTTTGTTCCCTTTATTTTCATATTTCTTGTCATATTCCTTTCTCAATTATTATTTTCTACTCATAACCTCACGCAAAATAACACAGTCAAATCAATCAAA	9.99141
FBA1	Native	AAAGACAAAGACATAATACTTCTCTATCAATTTCAGTTATTGTTCTTCCTTGCGTTATTCTTCTGTTCTTCTTTTTCTTTTGTCATATATAACCATAACCAAGTAATACATATTCAAA	8.99458
TEF1	Native	TAAACGGTCTTCAATTTCTCAAGTTTCAGTTTCATTTTTCTTGTTCTATTACAACTTTTTTTACTTCTTGCTCATTAGAAAGAAAGCATAGCAATCTAATCTAAGTTTTAATTACAAA	9.80978
ADH1	Native	CCTGCAATTATTAATCTTTTGTTTCCTCGTCATTGTTCTCGTTCCCTTTCTTCCTTGTTTCTTTTTCTGCACAATATTTCAAGCTATACCAAGCATACAATCAACTATCTCATATACA	8.64294
CWP2	Native	TCTTGTTCATCATTTTCAATTCTCTTCTTGCCATCCCTTTTCCTATCTTTGTTCTTTTCTTCTCATAATCAAGAATAAATAACTTCATCACATTCGCTACACACTAACAAGAAAAAAA	10.7688
HSP12	Native	ACTTCCTCAATTGCGTTTGATCTTATTTAATCTCTCTCTAATATATAGAAAAAAAAACCATCTGATTATTCGATAATCTCAAACAAACAACTCAAAACAAAAAAAACTAAATACAACA	12.326
PGK1	Native	AATACATATTTGGTCTTTTCTAATTCGTAGTTTTTCAAGTTCTTAGATGCTTTCTTTTTCTCTTTTTTACAGATCATCAAGGAAGTAATTATCTACTTTTTACAACAAATATAAAACA	11.2756
RPL3	Native	CTGGATATATAAAATACGATTTATTTAGTTGTCTTTGTCAATCCTCATCTTTCTTTACTCATTATTTCATTTCGGTTTTGTCATCTCTAGAACAACACAGTTACTACAACAATCAATC	21.0979
TDH2	Native	TCATTCAAGATAGTTTTTTTCTTGTGTGTCTATTCATTTTATTATTGTTTGTTTAAATGTTAAAAAAACCAAGAACTTAGTTTCAAATTAAATTCATCACACAAACAAACAAAACAAA	10.9656
RPL8A	Native	AAAAAAAAAGACGCTAAATTGTTTATAAAGGCGAGGAATTTGTATCTATCAATTACTATTCCAGTTGTCAGTTTACATTGCTTACCCTCTATTATCACATCAAAACAACTAATTCGAA	15.5271
CDC19	Native	CTACTCTTTTTCATATTCATTCTTTTTCATCCTTTGGTTTTTTATTCTTAACTTGTTTATTATTCTCTCTTGTTTCTATTTACAAGACACCAATCAAAACAAATAAAACATCATCACA	9.84048
RPS14B	Native	GATATAGTCGCAAGAACTTGCCTTCTACGAGTATAAAAGCGGTACTATTCCTTCTGTATGCATCTTCATCGCAAGAGAGAAAAAGACTGAAATCAACAACTCCCAATAACAATTAAGA	13.2865
RPL10	Native	AGAATAGTTTATAAAAAGATGTTGATGTGGAGCAACCATTTATACATCCTTTCCGCAAGTGCTTTTGGAGTGGGACTTTCAAACTTTAAAGTACAGTATATCAAATAACTAATTCAAG	12.6395
RPL28	Native	CAAACCTTTCATCTGTATCCCGTATATTTAAGATGGCGTTTGCTTTCTCCGTTGATTTTTTTCCTTCTTAGTGATTTTTTTGCATTAAATCCCAGAACAATCATCCAACTAATCAAGA	15.5865
LYS20	Native	ATATAAATGATATTGGCTGCTTATCGATAAAGTGTATTTGATATGTTCCCGTTTAGTTTATTCTTGTTTCTTATCTACATAACAAACAAAGGAAGGACCCTGTATTGTTTTCCTAAAG	10.7332
RPP0	Native	AAAGATTAACAATATCTAATTCTCGATTCTTTTTTCAAGTTTCAGCCATAAGATACATAAGCGGAATACCTTTAAACATCCTGCAAACAGTCTAATAAATACGTATAATAAGTTTGAA	9.80216
RPL7B	Native	AAAGTATATAAAAGTGAAATATTTCAGAGCTCTTCCTATTGCTTTTTCAATAGAGGCTTAAATCTTCCTCGTTTGTAGAGTAAGTAGACCCATATTACAAATCTCCATCAACGTCATA	17.0624
RPL4A	Native	AAAAAAAAAAAATTTATATAAACGAATGGTATCTCCATCACATTTCTTTTAGCCTCGCAACTTGTACTTTTCATCACTTTTCTTGTAATTTAGCAATATCCCAAGAACAATCATCGAA	20.3385
HHF2	Native	TTAGGATGAGGCGGTGAAAGAGATTTTTTTTTTTTCGCTTAATTTATTCTTTTCTCTATCTTTTTTCCTACATCTTGTTCAAAAGAGTAGCAAAAACAACAATCAATACAATAAAATA	9.22653
RPL15A	Native	GATGGCATTGCATTTTTACCACCGGTACATTTAACTGCTATTTCTCACGTTTCTTTCCCTATCCTTAAGTAATTCTTTTACAATCTAAGAAAACCACGATCAAACAAATAAATCAGCA	10.3531
RPL25	Native	ATGCATACAATCTTTTAGATATTATCTTTTAAAATTATTTTAAAACAATTTTAAATGTATCTCATATGCTTTTCTTCTGCTGTTGAAAAGGCTAAACAAAGAAGATCAATAAGATAAA	10.1961
HXT1	Native	TTATATATAAAGGCAACAATGTCCCCATAATCAATTCCATCTGGGGTCTCATGTTCTTTCCCCACCTTAAAATCTATAAAGATATCATAATCGTCAACTAGTTGATATACGTAAAATC	10.364
RPS13	Native	GATGGAAATTTATGTTGGCCGACATATATCACAGTCGTGATTGAATTAACAATTTCTTTCTCATTAATATTTATTCTAAACGGTTAACCACTAAATCAATCAACAACAATCAGTCAAA	10.8285
RPL26A	Native	TAACGACGACAGCTTGTCTAGAAGGCGAAGTACAAGATACTAAGAAGACTATAACAACAGAAGACAATTTTGTAGTGCGATTCTATATTATTGACGTAACCAACAAAAAAGTATCAGA	7.59141
ALD6	Native	ATAAGAAGTTTGGTAATATTCAATTCGAAGTGTTCAGTCTTTTACTTCTCTTGTTTTATAGAAGAAAAAACATCAAGAAACATCTTTAACATACACAAACACATACTATCAGAATACA	9.28898
HHT2	Native	TGTATATAAATAATCTTTTTCTTGTTCTTTTATATAGGACCACTGTTTTGTGACTTCCACTTTGGCCCTTCCAACTGTTCTTCCCCTTTTACTAAAGGATCCAAGCAAACACTCCACA	17.3116
HHT1	Native	GAAATACATATATAAAAGACTGTGTATTCTTCGGGATACATCTCTTTCCTCAACCTTTTATATTCTTTCTTTCTAGTTAATAAGAAAAACATCTAACATAAATATATAAACGCAAACA	20.2136
ADH2	Native	CTCTTACTACTGCTCTCTTGTTGTTTTTATCACTTCTTGTTTCTTCTTGGTAAATAGAATATCAAGCTACAAAAAGCATACAATCAACTATCAACTATTAACTATATCGTAATACACA	7.95096
RPS20	Native	GTAATAGACCGTATTGAATTCAAAATAATAGTAAAGATGGGTTATTTCATTCAAGCTCAGCTTTAGATTGAAACTCCTACAAGAAAGCAAGTAAAATAAACAAAAAGGTATATACAAA	5.82823
RPS3	Native	TGAAATACAACAGCATTTTTCATACATTTTAAGCAATTTCTAGTTTGTAGATATTGTTAGATTAGTTTTTGAACATTGTTTTGATAACTGAAAATAAAACAGCAAACAAACTACAAAA	10.2487
RPL41B	Native	TTAAATAATTGTTATCCGTCATTATTGTTTCACTTCTCTCTTTGAAATTTCGCTTGTTTTCTGTTTTCATCTTATATTTTACTTCAATCCTAAGATAGTCATATCGACTTAATTCCAA	9.08215
EFB1	Native	GGTTATCTACCCACTATATTTAGTTGGTTCTTTTTTTTTTCCTTCTACTCTTTATCTTTTTACCTCATGCTTTCTACCTTTCAGCACTGAAGAGTCCAACCGAATATATACACACATA	9.43665
RPL39	Native	TCTTCGCCTTGATAGATACTTTAAAACTTCTACTTAATATACTTTCTACAATTTTTGGTACATTCATATTATACTGAAAATTCGAAAAAGACAAGCAAATAAACACAGATAGATCAAC	10.1171
PSA1	Native	TACTTTACATTCGCTAACTCTTTTCTTCTGTCCAAATATTTTGTTGACTATACAAACAAAATATTATCAGCACAAGACAAGCTACAACTTCAACAAATAAAACATATATAATTGAAAA	6.4017
CIT2	Native	ACTTGGTTCTTTAGATATGGTGTTCGTTCCTCATTATTAAGTTTCAGGGAACAATATCAACACATATCATAACAGGTTCTCAAAACTTTTTGTTTTAATAATACTAGTAACAAGAAAA	NaN
RPL18A	Native	TTCTGGTTCCTCAAGGAATATTGTATGAGATAATTTAAAACAAATTGAGTTGAAGATTCATCAATTCTGCCATTTTGGATCCATCACAAGAAGAGATCATCAAGCTTACGGATTCACA	8.28388
RPS0A	Native	GATCCCGTAGCAAGGATGCTTATAATATATCGAAATGTAGCATTGTTAGTTTACTTCGTAAACTGCCCTTGTAGAGTGAGGTATAGCTTAGAAAATAGCAAACTAAATAGAGAGCGAA	6.18797
RPL30	Native	CCATTTGTTGGAATGTTCATTACAGTTTATACTTACTCCTTGCTCTTTTATAATATAACCAAACAGACCGGAGTGTTTAAGAACCTACAGCTTATTCAATTAATCAATATACGCAGAG	7.82198
HHF1	Native	TTCTTTTTCCTATAAATACCGAGATATTTTTTCTATATGATGGTTTCCGTCGCATTATTGTACTCTATAGTACTAAAGCAACAAACAAAAACAAGCAACAAATATAATATAGTAAAAT	21.2747
RPP1B	Native	CCAAATAAGCATTTGATGTTGAATCTGTAAGCCCCTTCGTGATATTTCAAGGTTAAATTACGAATTGCAGTTTCAGTTAATCTTGGACTAACAAAGAAATCAAACAACTAAGAAGAAA	8.73687
RPS5	Native	TTTTGTACTTTTTATCAATACTTAAAATTTCATTTTGAATTAAAATTACTTTTTATTTTAATTACACTCCTTTCATAATACCAAGAAAAGAGACTAGAAATAACCGACCATTCCAAAG	NaN
RPL22A	Native	TGTTTCAAACTATCATTTAGCTGCATACAATATGTACATTATTAATTGAGATTAACAACTTTACCTGTACTTTACCGTTATCAAATTATAAACCACCAAAACAACAGATTAAGAAACA	9.6673
RPS4A	Native	GAGATTGTCGGCAATACTAGTATATTAAAAATTATACTATAATTTAATCTAGTGTTGAAATACTTTCTTATATAGCGATTTTTCTGCCCAAAACAAACCAAAGAATCAATACGCAAAG	7.93891
RPL13B	Native	TCCTCCATTGGGAAGTTACTTTCTTACATACTATGTAATTAGAGGTACTTGAAGTTAGAACATAATGTAACATTAATAGGAAATAATTTCGGAAAAGTAAAGCAGGAATCAAGTAACA	7.58722
RPL7A	Native	ATCACTTTGACAACTTCATCCTTTCTGAAATATTGAAATAATCAAGACACTAGATCTGCCTTGTATTGTCTTCGGTTCATATAAATCCAAATAACCAACCAAGCAAATTAAGATCACA	9.5741
RPL5	Native	AAAAATAAATAGAAAAGTTTGTAGACATATCCGATGTAGTATATTTCAGAGGCCAACCTTTACTTTTGTTTTCTCCTACACTTCAAAATAAAAGACACCGTCACAAATCTCAGCAACA	9.42352
RPS15	Native	TATGGTCTCTTCTTTTATTTGTTCTTGGATTTCATTTTTTTCTTATTTGTTAGTGCTTATCCTTACATTGTAGAATAAGACGAACTAGAAGTACACAACAAGATAATCACGACCGATC	10.084
RPL33A	Native	AAATATTCGCTATCAAGCTTTAATTTACGTGTATTAATCACTAGTTCAAAACTTGAGTTATTTTGCCTTGAGCAATTGTAAGAATCCGTAAGAAACCAACAATCAAATAAATTGAAAA	9.48633
RPL14A	Native	TACTATTGAACTGAAAAAAAAGTAATCTAAGGTTAAGTTGATCAGGTCTGCCGATTGTATAACAAATTTAATTGTTTGTCTTAGTGAACAAAGAGAGTCGTGAAAAATAAAATAAACA	8.48436
RPS21B	Native	CTAGTAATTGAGGATTATAGGATTGAAAGTTTTATAAACATTGTTAACGAATTTGACTTTAAAGGGGAATTTCAGTTAAAAATCTGATAAAAAAATAAAAGAATATCAATAAGCCAAA	8.56919
RPL38	Native	TGCACAATATTGAATCTTCAATCTAAAGAATTAAATTTTCTAATTTCAATGTAGAAATATTTCAACTGTTAGTTTTTTATTTCAGGTTGAATATAGTACGACAAAATATCAAGGAAAA	10.4474
RPL27A	Native	GTTCGTTCATGTAAAACATACTGCCGTAGTTTTGAGCTAAAATTAAAGATATATTAGATTTTTAGAATTTCTTAGATAGTCTCAACGTGTTAAAACAAAAGCATAACCAAAGAAAAAA	NaN
RPS30A	Native	ATAGATAGAACAAAACAGCCTTACGAACGGTATGTTGCATTTTAAAGGCTACATGAACTGCACATTAAATTTGCCACTGTAATAATCTTCCATATCCCCATACAAAAACTACGCAAAT	6.6129
RPS23B	Native	TCCACGCTTTCGCAATTTTCAAGATCGAGATACTATTAGTGATGGTAAGGTTATGAAGCTTACATGTTTAATATTGTAGATTCCAGAAGCAGGTAAGAACAACAAACTACAAGAAAAG	8.03013
EFT2	Native	TATATATTCTTGATATCTTAGATTATACATATTATTCTCTTACATTTCACGATTGCCCTTTTGGTGTTTAGCATTCAGACTCAAAGACCACAAACACAAACTATAACATAATTGCAAG	11.8345
RPL31A	Native	GAATCTCATAGCTTGAAAGATAGTATTGAATTATATTGAAGATTTTATAACTAGTGATAATTTCATTCAAGTTTTAAAGAAAGAATTAATAAGCAAACAGAACTCAATCAAAGGAAAA	9.3741
ICL1	Native	ATTCTTATTATTTGTCTTGGCTTGCTAATTTCATCTTATCCTTTTTTTCTTTTCACACCCAAATACCTAACAATTGAGAGAAAACTCTTAGCATAACATAACAAAAAGTCAACGAAAA	10.4535
RPL11B	Native	TGGACATAACTCATCATTAAAGAAGTATACTGTTAAGAGAGGCATTCATTTCGTGTATTATAACGTTTAGCATCAGTTACCCTTGAAAGCCCAACATATACAAAAATACGCGTCCAAG	7.52651
RPL43B	Native	AGCTTGAAAAATTTGAAATTTCAACTGAGAATCAGAATATATTACTGCCCTTCGTGTTGTAGGGTTATTCATTAACTATATACGATATTATAAACAGCATAGATAATCAAACAAAAAA	8.22944
RPS16A	Native	GCTGCAACAACTGAGAGGGCAAGGATATACATAAAAATAGCCTACAAATTCTGAACTCTGTAAAGGAAGCCTCATAAATAAAGGTAGATAGTAAAGTATACAAGAGAAGAATCCCAAG	7.8519
RPL33B	Native	CAGTTACGCTTAGCACCAGATTTTGAAAAAACGATTATTATAGCAGATAAAGGTCCGAAAACAGTTTCTTTGCTTAAACAACCTTTGCAAAAGTAGAACCAGATAAATCATAGATAAA	8.65437
RPS1A	Native	TAATATACCCAAAATGACTAGATGTCACAACTATTCTATTAAGAAAGGAAGGTGTTCACGTTGTGAACTTTAATATTAAGGAAACAAAACAAGCACACGAATAACCAATCGTTTAATC	7.12211
RPL23B	Native	TTCTTTTCAGTTGGATGGAGAGTTATAATCAAGAAGTATATAGATTTTGAATATTGATTAAGCGAGTAATATTGCTATTTCGAAATAATCGAGAAATCACGATAATAATACAGCAAAA	NaN
RPL17A	Native	GCAATGGAAATTTCTAACATTAGAGCTTCAACGGCTAGCATAAAACAACTACTAACGTTTTCAGTGCTATATTCGAAAGAGCAAACAAAGAGTCCTCAAGAACTACTAATAGATTAAA	9.08894
RPP2A	Native	TTTCAATTGTTACTTCTGGTAATTTCTACTTCCGTTTATTCAAAAGCTTTTTCTATTATTTTAGTGATTTTTTTCTCATTGGAAATTCATACACAACAACAGAACCAATCATACAAAA	10.0068
ARO4	Native	TCGTCATTTTTAGCATCGTTATAAGAGTAATTAAGAATAACTAGAAGAGTCTCTCTTTATATTCGTTTATTTTATATATTTAACCGCTAAATTTAGTAAACAAAAGAATCTATCAGAA	11.0797
HAC1	Native	TTTTTAGCGAAATTTTCCTTTCTTCTTGTCTTCTTGTTTTATTTAAACTTCCAAGGCTTTAACTCAGTGTCAAACATAACAACCTCCTCCTCCCCCACCTACGACAACAACCGCCACT	8.34182
ARF1	Native	ATCGAGGTGGTTTTTATAAGTCTTACTAGATAGAAAGTTCATTTTGTTTTGAAACTTTTTGGAACCTCTGGCATTGAAGGTATAAGAAAGAACTCAAACAGGTTTAATAGAATTAAAA	9.81173
ILV3	Native	AGTATATTATATAATGTAACAAAAGAAGAGACTGAAGTTTTATTATGCATTGTAGCGCCTGTAATCTTTAGTAACGGATTCTTGTATTTTTTTGTAAACAGCCAAGAAAAAAGTAGAG	9.39986
PFK2	Native	TTCCTTTTTTTTTTTTTTTTTCCTTCTTCTTGCTTAAAAGCCTTTCTTATACCTCATTTGAACAATAGAACTAGATTTAGAGACTAGTTTAGCATTGGCCAAGAACTAACCATACGCA	10.0847
RPL4B	Native	AGTTTTCATGAAGATCATGAATACGTTACACTACTATTATTATTGAAAATAATATTTCTTTCCTATCAGCAATCGCTTACATATTCATAGTCATTTACTAGGGTATATACCAATAATA	8.00065
SUP45	Native	ACTGTATTTTTAACTGATATACTGTTGGTGTGGCCTTAACGACACCTTTATTTCTTAATTCATTTCGGCTTGTCTCCTTATTAAGACTACAGAAATAGACAAAGGAAATACTTCAATA	9.96035
BGL2	Native	ATTTTAACTGCCTCCTTATAAAGAAACTTTTCCTCATTCACAATTTGGACTTCTTCTTGTTTTTTTCAATATAAGTTTATTGAGATAGACAACTAACCAAAAAGAAAAACGGTCAAAG	13.4062
ATP7	Native	TTCTATATAAGTTTATATATTCATATTGACACGTAACGCAAAAGAACAATCTTAGGATTTAAAAGAAATTTTTCGTGCACTTAATTGCAGAATCACCTAATTATATTTTTGTTCGACT	9.44331
ADE13	Native	CCATATAAAACAATTATACTTCATCACCAACCTCTCAAAATTTCTTCCCCAAGGACCAAAGCTTTTCCAGTAAGTTGCTACAACTAAAGTGAAATAAACTATCCGAATTATATAAAAG	NaN
ISU1	Native	TTCCTTCGCTCTTCCGCATATATATTTGTGTTCAGAGATTATTCTTAAATCCATAAGAACATCCCTTCATATAACAATTGAATAAGGAAAACACAACACATAACACATATTTAACCTG	6.51724
YMR226C	Native	TATCGGAGCGATATAAAAAGCTGAAGAAAGGAGGATAGATGAAACAGCATGGCGCATAGAAAGTGTTCAAGCTCACTAGTAAAGGCGGGAAATAGAACATTGAGAACGTATTTTGATA	13.534
COX12	Native	CAGATAGAAAAGTTGCATTAAAATGATTAGCAGAGATATACAAATATTTTAGTAAGAATACATAAAGTATCTTTGCTTTCACAAATAGGAACAAGCACATAAATACAGTATAATAGAC	7.4535
PFY1	Native	TTTTTTTTCTTTTTAAAGCTCAGTTGACCCTTTCTCATTCCCTTCTTAAAACAACTGTGTGATCCTTGAGAAAAGATAAATTACATACACAACATAAACCCAACTACGATCGCAAATT	NaN
DLD3	Native	TGAGTATATAAGTGATCACTCGCTTATATAACTGACGAGGCAGAACAGGGTGCCAAAATGCTCCTCAATATTTTATTCATTTGAGATTCAAGGCTTAAAGACAGCATATATAAGAATT	NaN
GRE3	Native	CTGGTACACTGAAGTATATAAGGGATATAGAAGCAAATAGTTGTCAGTGCAATCCTTCAAGACGATTGGGAAAATACTGTAATATAAATCGTAAAGGAAAATTGGAAATTTTTTAAAG	11.6091
KGD2	Native	AATAAAAAATTAGGCAGCTATCTTTAACGGTATATATCAGTGAATAGATATATTGTTATAAACTTCACTACCACATTTGTTACAACCAAAGACACAACTTCAGATAATTATTTAAACA	8.24114
ATP17	Native	CCATTTTGATTATAAAGAAAGGCATTATTTTCTAGGGCAAGAAAAGACATTGTTGAAATTGTTCCAGAAACTTTCATTTAAAGTCTTTCGTGAAAGGAGTGGACGTCAAAAAGAAATA	9.54068
PRE2	Native	AAGGTGAATTGTAAAGAAAGGCTTCAATATATCAATTTTCAAAAGAGAATAACAAATTTACTATTAAATTGAATAGATAGAAAGAAACCAGAAAGAAAAGAAGGAAAAAAAAACAAAC	NaN
COX7	Native	GCAGGTTTGAAAAGGCGGATAGAAATAAAAGATGATATTATTTATTCATCCCATGAATAGTAGAACTCGATATAAGATTCTAAACCAACAAGTACAGAAAGCAAAACAATAATAAATA	10.6052
RPL9B	Native	AAAATTACCAACCATATTTCTATTTCCTTTCCCTTTACCTATTCTCTTTTTGAAATAGTTCATTTTCTCTCTCTGAAACGACAATAAACCAAACTCTAGCCTCCAATAGTCACTAAAG	9.78161
MRS11	Native	AGCTGGCAGTGAACGTACAAGAGCAAGCTCTCTAAAGAACTATTACTCTCCTCGTTCCCCTCTCATGTCTTTTAACAGATAAACAAGCAAAAGAAGGAACTATCATACTTAGAAAAAC	7.46601
ATP14	Native	AAAAAAAAAACCCACTGCTCAGATGTTATAAGGAAGGGGTGTTAACTTATATACAGGTTCATCTACCAGTCACCAGTCCATACAAACTTGAACCGTCTGCGTACCAGTCCTAATCAAA	7.83223
COX13	Native	ATATAACAAACATACACGTTGCCTTGAACGTTTTCACTACACATCGCATGTGTTTTATCTAGATTTAAAATCATATTACTACAGTTCTACAGTTATACAAATAACAAACAATAGAAAA	NaN
ATP4	Native	AGGGATTATAATTGCAGTTAGCAGTTTATGTTGACAAGTTTATACTGTGCTAGGAAGGGTTATATTTTATTAAAAGACTGACGAGAATTCAGTACCTCCTAAGTGCGCAAGAGATAAA	NaN
RPL35B	Native	TAGAGGCCTGCAATCGTCATCATATGAGAAATGGATATATTGAAAATCTACTCACATCTCTTTTTTGGGGGTTTGGTAGTACAGTGAGAACACGATAAAGAACCAAATAGGACTAAAA	6.5546
VPS21	Native	AGTGAGGTGAAAATACGAGCAGCTTATCTTATAAAAGTGGCAACGATTTTAAAAATAAAAAGCAAGATCGTCGACTTATCTAAGCTATAAAAAAATATCCCTTTTATCACACAAAAAA	12.0103
AAT2	Native	CCTTGTCGCCTTGCACGTCGGTATATAAACGTATGTGGATACTTTAAGAAGGGAAAGCGCAACCGTCCAAATTCTAATGAACAAAAGAACACAGGAATACAAGAACACAAGAGCGATA	9.79996
COX5A	Native	AGCGGCGGCGAAAAGTTAAAAAGAACAATCAATTAAATAAGAACCATCAGTCCTCGTATTTTGTCTTCTGTTTGCAAGCAATGCACCAAACACAAGATCAACTAAGAACGCATCTACA	7.25669
ADH3	Native	TTTAGAAAGGAACACTCGCTTTATCTCTTCGACCGAATTTACTATACATGGATATATATATATTATCTTCTGTTCACAGTTAAAACTAGGAATAGTATAGTCATAAGTTAACACCATC	6.88771
DED81	Native	AAAGACGATCAAAAAGGTAGAAGAAATTACGTTTGGGCCTCAGATTGTGCGTAGTAGTAGTCGGTGCTGGGTCCTCACGCAAGTAGCAAGGTAATCTATATCCTCATTTTTTTCAAAC	4.20291
RPS17A	Native	ATCGTCGTGATCGCTTTTACTGGCATATTAGCGTAATATGTATGAAATTAGGTATTAATCAAGCATTAATCGACTTAATTCTAAGAAAAGTCAAGATCTCGAGACTAGCAATAACAAA	8.11747
BDH1	Native	ATGGCCAATTCAAGCCCTTTGGGCAGATGTTGCCCTTCTTCTTTCTTAAAAAGTCTTAGTACGATTGACCAAGTCAGAAAAAAAAAAAAAAAGGAACTAAAAAAAGTTTTAATTAATT	NaN
VMA2	Native	AAAGAAAAGGATAAGAGATAAAGGACTAAATGATTTTAATACAGATAGACAACCATTGTTGACAGGATTGCGATTGTAAGAGTAGACAGTACATCAAGCGAAAATAAATATTGCAGGA	9.20947
RPT2	Native	TCTTTTCTTTTACCTAAAAGAAGGTTAATGTGAATATTAGTGAATATGATGCGTATCAGTGTCAAGCTTACAGTCAATTCAAGTTAAAGAAGAGACAGCGTTTTTAATAGAAAATAAA	8.05251
SOL4	Native	CAGCGAAAATTGTAAGATCCATAATATTTAAGAAATGACGAAGAACGTAGTCTTATCGCAGCAGTTTTCCAAACAAAGAATGCCATTCATCAAATAATCCACAACCACCTCAAGAAAA	6.83829
RPS29A	Native	ATGGACGGAATAACAGGTATAAAAAATCCACGAGTTATCAACCTCATTCTCTTTAAAATTGGAATCCAATCAACCGAATTCATTTGTACTAACAACGTTTCCTATTATTGCAGATAAA	13.9995
BAT2	Native	TATTCGACTATTTCCTGGGAAAAAATTCATTCCTTTGAGAAATCCTTAATAAAAACAGACTAACTACTAAAATTTTAGAAATTTAAGGGAAAGCATCTCCACGAGTTTTAAGAACGAT	7.51109
VMA13	Native	AAAGGTTTGATAATGAAAAAAAAAAAAAGTATTGTATATGACTGTTTTCCTGATAAAAGAATGCCTGCAATAATTCAAAGACAAGAGATATAAAAGTGCACTGGCGATTTCAGGAACA	6.70606
RPB10	Native	ATTTCATAAGAAAAAAAAAAAGAAACATTGAATAAAATCACAATGGGATGATAGTTAAAGTGTATTCAAACTGTAGAGTGTAGAACGTAAACCTCAATAAGCAAAATAATAATACAAA	6.61597
ATP15	Native	CCTCCCCTTTTTCGTCTAGTTAAATGAAGAGATACAAGTAGGCCTTTCTATTGAGTACTTAGCAAGATATGTATTTCTAAGAAACATCAACAGTTTCAGCCCACAACCGATTCATAAA	7.04079
RPS22B	Native	AACCGATAATAAACCGGAGGACACATTTTAACCCACTATTTTTTTCAGAAGATCAGATGCGAGAGCTCGAAGCATAAGTATAATACTAACGTTTCAAAACATAGTAATTAGGTAAAAA	7.05511
YNK1	Native	ACTTAGTACTTCGTTAGCTCATATCGTTTTCTTATTTTGAAATAGGTTATCTATAGAATACTTTATCAAGTTATCAGGTTCTTTCCGGAAAAACATCTCATAAATCATCCCTGGAAAA	9.95321
GRE2	Native	TTGAAAAAGGGATCCTTAGTTTCCCAACTATATAAGGAGGAAAAGTCTATCTCTGTAGCGTTGATATAACGTGTACGATTTTCAAACAAACAGATAGCAGTATCACACGCCCGTAAAT	15.8906
TIF11	Native	CAAGAAGTAATAGTGAAAAATTGAAAAAAGCTTCAATTTTAGTTTGCTGAAAGAAACCTTTACTTATGTAGAAGGTGTACTTGCAAAAGCACTAGTGTAATATAGAGCAAAGTTCATC	6.83304
VMA10	Native	TTGGGTATCAAAAATTTCATCTCTAAAAGGGAGCGTGATAGATAAAGCAATCACACCTTAAACAATACATTTTTTTTTTTCCTGCAATCTCCAAAGTGTGCAAGGTATACAAAGCAGA	9.09299
QCR10	Native	CATAACAGTTTGAATGCATAATTTGTTATAGATATCTTCTGGAATAATCTTCACAGCAAAAGCGCAAGTCGAATAATATATCGATAAATACAATCCATAAGACTTAAAACTAACCTCA	9.06389
ARO8	Native	ATATATTTGGTTTGGTTATATCTTTAAGAACTTATTTCTTTTTCTTATTTTTCCATTCCACTAAGTTAAACCCTGCAGTTGATACAGACATTGAATAGGACAACCGATCGTTACTATC	10.325
VMA6	Native	TATACTGCAAAAACAAAAGAACAATTGACCTCTTAACCCTTTAAGGTATGGCATAAAGAACGCTAAGAGCTAGCAAAAGAGTATACCATTCGGATCGTGTTGCTAAAGTCTTGCGAAG	5.71831
URA1	Native	GCATGGCATACGCATCGGGAACCGGTATTCTTCTCTTGGATTACACAGTTTGGACTACTAGACGTTTCAAATAGATATACACAATTACTCAAAAAAAAATTGAACTTCCGTACCAAAC	3.988
DPM1	Native	ATAAAGGATTTCCAGTATTTGAAAAATTTTCAGTATTCTTACGTGTTCCTAACTCATATAGACCGCTATTGTAATAACGCTATCGCTTCAATTACACACAAACATACACGCACCCACA	8.28112
NQM1	Native	CATATAAAAGAAGAGCAATCTTGCAGCGCAGTCATATTTATGCTAAGTATATCATTATTTCTTGCTAGCGTAAGTCATAAAAAATAGGAAATAATCACATATATACAAGAAATTAAAT	16.5041
QCR8	Native	GAAAAGCAACGACCTCATCTCTCGAACATTGTTTACTTGAGCAAGTCCGATTAAGAGTAAGTTGTCGTACGTTAAATACAAATAATCAACAAAACACTACACAAAAACTTCTACGATA	8.20478
GLO1	Native	ATATCCCGTATTTCTAGTTAGTGACGTTTATAAATAGGGAGAAAAAAAATCGGAATAACATTTCCATGCCTTTTTTTTGACACTTCAGACCAGATACGCCACCAGCTACAAACTAACA	13.5506
OST1	Native	AGTATGCAGAACAAATTAATGTTTGCTTTTTATTAAGCAAGCTACTTCTTTGACAAGTACCCGATTGCTTCTTTAGCTCGGAACAAGACGCAAACTACAAAATATTGGTGCTGAAAAA	8.19361
LPD1	Native	CCTTTGACTCACCTCGAATATATATAGATATATATATACATATAACGTATATTTATATATATACGGTTTTGTTCGATTGTCTCTGTCGTACCATCAAAGAACATACTAACAGTTCACA	12.2983
RPA12	Native	AAAAATATGAAAAAAAAAAAAATCAAATTTATGTCAAGTGAAGGGCATTGCATGGCAAGTGTAAAGAATCCAAGAAGAAAAGAAAGGCTTAAAGCAATCCAGGTTAGTACTTATAAGA	7.80484
INH1	Native	TATCTTGTTTAAAACTTTCTTTGAATTTGTTCGTGGTTGAATTTGTTTTTGCTATCCCAAAGGAGTGCATTTTACACGCATTACTACAGCACACTTTTATACAGTTCCACAATAGAAT	6.55155
VRG4	Native	GAATATATATAACGCTGCCAAGCCTATTTCTTGTTGCCGATTAATTGTTGACATCCTCTTAATTACCAAAAGAGCCTAAGAAAACAAACACACTAACCACACAGTATCTTTCGCCCGA	8.82226
ATP18	Native	TTAAAAAGGCCTAGAGAAAATATAAGGAACAATCAGCTGAGATGTGTTGAGAAGAGTTCGACTCAGATATCGTTAGTTTAACATACGACGACAGATTAATTGATTGGATTGTACTGCC	7.03543
RIP1	Native	CTCTGTCGTAACTTTTTGTTGCTTTCAAGTTCAACGTCTTTTAAAAACCAAGAAATTATTGAACATAAATAATATCACTCTAACACTTATTAGGAAACCGAAAGGAGCAATAACAAAC	10.4579
UGA3	Native	AGGGTCTGAGTCATCAAAGAAAAAGAAATTACAATAAGAGTCTTACTTAAGATGATATAGAATTGTTGTTATTGTTCATGTATGGATGCCAAGAAAACAAAGTTTTTTAAAGTGAGGT	4.54876
CEG1	Native	TAATAAATAGTTCATTGCAGAAAATAACGAAAGAAATGGTGGAATACGATCTGTTATATCTAAACTAAAGCTAACTAACGGAATAAGCAAATACGAATCGACCGCTAATTTAACAAAT	9.58684
PRS4	Native	GAAAAATCCTGACGAAAATATTTCAAGGTCCTATATGGTCATCGACCTTGAGCATGTGGTAGACTACATAATGCACATAGACTCTCAGCTTCAACTCCACAAGGCTTCTCCAGCAAAA	5.30637
PAP1	Native	AGACACTAAACTAGCTAAATAATTTCACTGTGAGCAAGTCTTTAAACGGTCTTTTTTGAATCAAAAGAGGCCTAGAATTAGCAAAATATTTAACGCATAAACTTTTTTTAGACAAATA	6.69806
YOL002C	Native	CCAACATCTCTTCGAATAGTAGATTAGAAATAGTATTTATGTCAGCGTTCCTTGAGCCAAATGTACTAAATTTCCCGTCGTTTTAATTATGCTGCATGTTGGAGAAGAATCATTCCAA	NaN
RBK1	Native	GGAATAAAAGGGTTTATATCCGAAGGTGGCCAGAACAATCATGAAGCAAATAGGATAAAAATAGCCAATAAGATGTTTGTTGTCTTTCATCCCAAAGTTCCAACAGCATATTTCAAAG	2.6593
DLD1	Native	ATGTATATATATATGTGTGTGTGTGTGTGGGCTGGAAAGATTTCTTGAGCTTCCGTGTTATAGTGCAATTTAAATATTGTACATCATTCCGATCCAGCTGGAAACAAAAGCAAGAACA	15.1791
YLR005W	Native	TTGTATAGTTTTTCAAGATACGTAAAAGGTCTTCATCTTATCTTATATAGATGCAGGTGATTACTAGTGGGGCAAGTCGGCAGCTAATTGCGTGTGTGCGGAAGGATTGTGCAGTAGA	5.17967
GSH2	Native	GAACCTTCTTGAATTATCTAAATGTCTCCCAAATCAACCACATCCATATACGATCCTCCAAAGGTAGCAAAGTGCCACTTCAAGCAATTATAGGAAGAAAGCACTACTCCTATAAAAT	7.88014
IDP1	Native	GCGCGGATTTTGACTCACATAATTCCACTTGCCCATATAAAGAGGGACTCATATGATCTTATGAAATCTTCCTTCAAGCAATTGTGAGACAACAGACGCACAAGGAAGATCGCCCAGC	9.81163
GDB1	Native	ATATATACTAACCTCGTATATTACACACTGTACTTGAAGTCACTCATATCCGAATACTACTTCTCTTAACTTCCAGTCAACCCGACACCCACAATCGTCCTTAGTATATAACTGCTTT	4.3908
GAL3	Native	CAAGTGAGGCAACACCTTTGTTACCACATTGACAACCCCAGGTATTCATACTTCCTATTAGCGGAATCAGGAGTGCAAAAAGAGAAAATAAAAGTAAAAAGGTAGGGCAACACATAGT	NaN
HMO1	Native	CTCTTCCTTCAAGAACTTAGCAAGAAGTACCAATTAGTCCCAGCGGGCCCTCAGGGCTGGTCTACTGCCTTATACTCTAGGATGTACATCCTACCACACACAACAAGCCTGTCACACC	NaN
YLR164W	Native	CGAATTTCATAGAAGCAAACCTATATATTTTCAGTCCCCAGTGGACAGACCGTTTATCAGTTCTAATGAATCAGCAACGATTCTCAAAAAGGTTGCCCCAATTCTTAGGAAAGTAGGA	5.54105
CDC37	Native	TTTACTGAAGGATCATGAAAGATTGCCACATAAGAGAACACCTCCGTTGCACCAACACTTCATCACGATAAAAAAACTATCGAGCTATCGTACTACGGAACAACTACATAAGTCAAAA	8.36189
COG1	Native	TCTGTTACAGTTCATCATTATGCTGAAGAAAAATGAAACATGGCGGTGAATAATAAATAACACATTCGTACAACAAATCTTGTGGTAGAAAACCTAAAAAAAACCAATACGATAGAAA	5.52017
SEC9	Native	CGAATCGTTTGCGTAATTATATGACTTGCTCCGGTGTATAAATAAATAAAGTACATTCTTGGTACTCCTGAACCTAGCCTGGAGTAACTCGGAATAATACACCATTGACACCAAAAGA	5.5279
RPC31	Native	AAATTTGAAAAAATCTCAAAGAAGAAAATAGTTTCCTCATCGCAGCAACCTATAGAAAACAACACGACAGAAAGATATTGTAACTTGATAGTACCGAGCATATATACCCCGAACAAAC	7.35681
SOL2	Native	AATAGGGCGGGCGCTACAGGGGTTTTCCTAACAAATTTCAATGATAATAGTGGCATCATCATCGTCATATCCAGTGTAGGTATGGACTAGAACAGAAAGCAATTTGCAGCAAGACAAT	4.38334
GLO2	Native	AAACCCATTATATCCCTCTTAGAAAAATTTTAGTATTCTTAGATAAGTTGCTAGATTTACCAATATCAAAGGGAAGACTGCAGGACAACACAAAAACACAAGAAAAGGAGGACAAAAA	6.52466
ATP3	Native	AATGATTATCACTCAGTTAAAAAAGACAAATAAGAAACTATTGAGACTGAACCGTTTTGGTTAATTTCAGGTGGAAACAATTGAAGACGAGCAGTAAACATTATTTTATTTAGTAGTC	7.23618
BIM1	Native	GCGTTTGAAGAAGTTAGTAGCAAAATGGCGAAGAAAACAAACACTTGAAACAAGTCAAAAAAAATTGAAGGCAGACTCAAAAGCAAGGATAATATTCCACCAAATCAGGGACGAAGCA	NaN
PCC1	Native	CTTCGCGAAAACTCCAGCGACACCGCTGGTCCTTTAAGTTAAAATAATATGAATGGTGGAAGAACCCAGATCAACTTGACTGAAACAAGTCTGCCAACATAGACAGCTAAGAAAATTG	5.40236
YRM1	Native	CCATGGTTTACAAGGCGATAAAATGACAAATGCCAGGTGGTATTGTAATAATAACGGCAAGAGTATAGAAAGTCAGAGGGGAAAGCACATTGAATGGTCCTGGTAAAGGGAGTTGTTA	NaN
SRB6	Native	AGGAAATTGTACTGCCATTTAACGCATTTACCTATCACTTAGTAGCATGCATAAGCCATGGGCTAATCATAACAGATTGTGATGATAGGCATCCTGTACTCCTTTTTTTTACAAGAAA	3.3693
SPT3	Native	GAACCATGTAATATAGATCGGCGGAAACGAAAAGTAAAAAGTAAGGTTGAAGACACTCTGAACCCGGGGAAGAGTGCATACAAGGTACCGTGCCAAAATTCAAGAGATTAGGGCAGGA	5.33623
SOL3	Native	TTTTCTTACCTTTTTATCCCCGACAATGGTAATAGTGGTATATTATATAAAGAGGAAAGGCCTCGAGGATAATAGAAGGCAATGCACCATCAATTGCTTTACCCCTGGTCCGCGACAA	4.75027
PSF1	Native	GCTCAAAACCTTCTTGTCGTTACAACGCGAAAATTGTAATTTAAAATAACTAACGAAGAAAGCTGAAAAATAGATGTGAGGGAAAATCGTTTATAAACGGCCATGCTCACAGAGAATC	NaN
RUB1	Native	TTCGGGAAGGCAAACGAACAACTTTTAGCTGAAAAACCAAAATTCTGTTATTCAAATGAAGTATTCCGACAGAGGAATAAATAAAGGAAGGTAATTAACTTCCTTACAGCCGTAACCG	5.22322
DLD2	Native	GACAGGTTATATAATTCAAAATCTATCTGACTCTGAAAAAGTGGTAATAAATGCATTGACAACTTCTTCTCTTTATTTTACAGACATTAATCCAGCACTACAAGTGGCATATAACAAG	9.48438
DAD1	Native	AAGTCAAGGCCGCGAAAATAACAAAGGGAATAAACAGTCACCTTTAACAAGAGGAGGTAGTAATTAGCGTAGGAATAGGACTGATGAAGAGCTCGGACGTGTGAGGATATATGTACAT	NaN
TPI1	Native	TTCCCTTCTTACGTAAATATTTTTCTTTTTAATTCTAAATCAATCTTTTTCAATTTTTTGTTTGTATTCTTTTCTTGCTTAAATCTATAACTACAAAAAACACATACATAAACTAAAA	9.26879
VMA8	Native	GAACGGGGATTGTTAAAAGACAATGGCAGTACAGATAAAGGTTAGATGAAGCAGCAGTAGAATAAATCAGCATCTGTAGTACATAGGTTCCTAACAGCATTGTGAAAAAGGTTCAAAA	5.67582
PRS2	Native	ATTTTTCAACAATGAAAAAATTTTGAACAATAGATGATATGAGGAGGCATCGAGGGATTGCTAAGAAGAGGATATTCCTCATCATCCAAAGACTATCTTGTCGTAAGTTTCGTTGAAT	4.30353
DEG1	Native	ACTTTGTTTTTCAGTGAAAAATTTTTGAAAGCGAAAAGCCGGCTCAAAATAAAGAATAATATAGTATTCTCGAGGTGCCCACATGCAATCTTTACTGCCCTACTATAACCTCCCTTGA	2.3189
YHL012W	Native	CTGGCATTTACAATCTTTTTGTAACCTGGAATTTAACGATAACTGACACAAGTGATTCTTGATAATAAAAAAAAAAAGGAAAAATATTTCACTGTTCTACATAGTATATACAAGATCA	4.59102
SGA1	Native	TTTTCTCATCTCTTGGCTCTGGATCCGTTATCTGTTCTGTTACACAAGAAATCGTACATTTACAATATAGTGATAATCGTGGACTAGAGCAAGATTTCAAATAAGTAACAGCAGCAAA	9.72244
GAT4	Native	CGCCAGGCTAGTCTTTCACATGTAAGTCCGTGAAACCACATAAACATTTTACTCTTTAACTGCTCAAAAAGCTGGCACTTTCTGTTCCTAGCTAGAAACATAACATTACAGGGTCGCT	4.70927
MAD2	Native	TACGTATGGTTTATGATTTAACATTTCAAGAATAGAAATCGCCCCGAAGAATGATTGATGTTAAATACTCGTACAAGAGTATTGAAAACCACTTCAAAGGGGCCCAATAGCACATTTA	4.14449
GLG2	Native	ATATAAAGATGAGGGGAGTAGATCAAGGATAGCGCATCCACCTCCAAAAGCATTTTTTTACTTATACATCGTGTCATTTTTTTGAATATCTATCAGAAGTAAGGTTTGTTACGGAGCT	12.4386
CDC8	Native	GTGACTTTTGACGCGTTAGGCGTGGTGCTAAAGATGGCGAAAAAATGTAACGTCTTCCCAAGAAGTACGCTTCTAAACTAAATATGATTCATAGTGGACAGAAAGATCACCATTTTGA	3.59196
PNP1	Native	TTACAAAGCGCAAAGAAAAGGAAAATCTCGAAGCAGAGGGCAGATAGGGCAGGCATAACTTTAGGATAATCTTGCTAATCTTCTAGAACACATGAGAAACTCCGAATAAACTTAAAAG	NaN
SEC22	Native	CCATAGAAGATAAACAAGTAGAGCCCATGTAATATAATATATCTACAACCTATTATTACCCAAAACCAACAAAAACCCTGACAGTGACACCCCGTTACACACTCACAATTAAGTAGGG	5.7591
KAR1	Native	CCACAGCTGAAAGATCTAACAGGCGTATTTTTATTTTCGAAGAAACGTCCTAAAAGGATCTGATTCAGCACATTGATAATAGCATAGGCATTTTTATCTTTCTTTTTTGAGTTCATGA	NaN
DAL82	Native	TCTTCACATCCTTCGATTACGGCGTCAAAATAAGCGTTATTTCCATTCGGGTGAGTTGAACCATTGATAACAACATGGTTTAACGATACTTTGAAAGGTTTAGGCGGAGCCAACCATA	3.3693
CDC31	Native	GCTTAACTATTGCGAAATAGAGAGAAAAAAAGAAGAATCCTAATTAGTAAGTATGGAAGAGATTTATTAAACGAGAAAGGAAGTGAACCAAAGAAGAAACGGAAATAAATCATACAGT	6.8241
MET31	Native	TTCTAATGCAAAATATAACATGGGTAAGAAAAAGAAAAAGCCGTTCCTCAGTACGTAAAGAGATTTGATCATTAACAAGTTGGGCTCAATATACACAGTCGATAGTCTATATGTGCAT	NaN
ATG5	Native	AGATAAATTATCATCACCTTTTTTACACTAAATAATGAAGTAGCATGCTCAGAAGTGCGAATGAATTTTTGTTCTTTTGGTTCTAGAAGAACGGAGATAGGAAACCTATGATGTAAGT	NaN
HUT1	Native	CGCTTCTAAAGGTTGTTTTGTAGATCCCATCGAACATGAAAAAATGACAGCAATGTAATTAGAACCAGAATTACAACGTAACAAGAAGAAGTAAACAAGGCAGTATTCGTATATTTGT	5.22795
YPR199C	Native	AATTATAATATTCCTATCTTTACAAAATCATATTAGTATATAATTCTAGCATGCGGATGGTCTTTAAGGAGCGGCCGTTGAAAAAACATGTCAAAACGGAAGATAAGTGACCAAGATA	2.42962
ALD4	Native	GGGGGTTTGTCGGTGACAATTGACTTCACTCTCCTTTCCTCAAAAATTCTTGGGTGTTAGGATTAGAAGTATCTGGAAAACCAACCAAGAAAACTACAATAACAAAAATAAATAAAGC	5.75593
QCR7	Native	ATAGAGCAGTAATAAAAGGGAAGAGATGTAAAAGCTTGGAAAAATAGCAGTAAAGGTTGTTGTTGGACAATTTATCAGAATATTAGTAACTGTAATTAAACGTTCCAGAAAGAACAAA	9.68716
SDH2	Native	AAGGGGATTAATGACTTTCTATGAGAATGCCAAAAAATGTTAGGCTAAAGGAAGGGATTGAAAGGAATATAGTTGAGCTATACTTTCTTGAAATACTGGAGTATACATATTTATAGGG	4.15911
GLK1	Native	TGAAAACGCGCCCATATAAATATCCGCTATCAACAGAACCCCCAACCCCCCCATCAGTGCCCAACTCAGCTTCCGTAAACCACAACACCACCACTAATACAACTCTATCATACACAAG	9.16991
TIM11	Native	TATTTAAGGGTATAAATTTTTCTTTAGTTTTTTTGACTTTTCACACAGAAATTTTAGATAAAAGGAAGTATTATATCGGAACATAACGTATATAGGAACTAGCTGAGTGAGTTAAAGG	17.1655
ATP19	Native	TTCTCGATGCAAAGGGAAAAAAAAGAGCTTTTTAGGAGCAAGTCCCCCCATAGAGCACATAACTCGTTAGCATTGAATAAGGCCAGGTGACTTCAAATAATAATTTATAACTACGACA	5.82121
ATP16	Native	CATTGTAAAAGTTCATGTTAAATTAGATGGAGGATAACAATAAAGGTATCGTACACACACTGCTAAAAGAGCCTCAATCAATTTGTGAAGGTATAACTGTAGCCGTGAGGATAGGAAA	5.66891
ATP20	Native	ATTACATTTAAAGACCGAAAAATGAAGATGCAAAGATCCCTCATATTTTCTACTCCAGTCCAAATCGACAAGATAAACCTGCCGATAAATCATATTTCAGAACGCTAATCAATTCATC	11.7366
SDH3	Native	GCTCTAAGCGTTTGGTACTTGTATAAATGTGCACTGGCATTATGATATCGAGATCCCCGCATAGAAATCTCAGGACCAACCAAAAATTGCCAATCACAAGCTCTAAGAATAATAAACG	NaN
COX9	Native	TTCCTGTGGTATTAAAAGAATCGATGAAAGAGACTCTTATCTTCAGGGAAAATTAGGACCGAGAATTAGAGCAAGCAAGATATTTGCAAACTACTAACTACAAGCGACTTACACAGAC	9.03412
BNA2	Native	TCAACGTCGCTCCGAGGCAAAAAAGCCACCGTCAGAAATAATTACTGTCACACACACTAGATGTCCATGTATCTTTAGCATATATAAAGCGAAAATAAAAGAAAGAGTCAACGCCGAT	3.25082
CTK2	Native	ACTGTCCTGAAAGCCGTCTTTATACACATAGATATATATATATATATATATATATCTGTATCTATAGAGCGAGAGGAGATATAGAGCCAGCAAAACTAAGAAAATTACGTACTTTGAT	NaN
DAP1	Native	TTTATATATCAACGATCATTTTCTTGTTGCAGTAAGCTATAATAGACGCGTCAAATAGTCTAACCAGTCTAAATCTCATCAGCCACACACACGTACATCGGAATATTATAGAGAACAA	9.25557
ERG1	Native	TCATTGAAAATTATATATATATATATATATCAGAACAATTGTCCAGTATTGAACAATACAGGTTATTTCGAACAATTGAAAAAAAAAAATCACAGAAAAACATATCGAGAAAAGGGTC	NaN
ERG9	Native	ACCACGGGCTATATAAATGGAAAGTTAGGACAGGGGCAAAGAATAAGAGCACAGAAGAAGAGAAAAGACGAAGAGCAGAAGCGGAAAACGTATACACGTCACATATCACACACACACA	NaN
GAS5	Native	AATAGGAAGGTCCCTGAACTGATTTGTTGACAGTGTTGCATTTCGTATATAAAAGTAAACAGTGGGCTGTAACAAACATATTATATATCACTCGCTACACACACAGCTCTAAATAGCT	6.32315
GDH3	Native	TTCGAACTCAGTTATATAAAGGTACATACATAGGCCACACACACACACACACACACATATATATATATATATAGGGAAGTAGCAACAGTCACCGAAAAGAAAAGGTAAAAAGTAAAAA	10.7202
GEP4	Native	CGAGAAATTTATGCTATCGCATTTAATATGATATAATTATCCGTCTGTTTATATATATATATATATGGGGCCAAACTGAAAGGCGGCAGTTACATTACATCGTCTCCTCTACCTAGTC	5.17789
GND2	Native	CAAATATATATATATATATATATATGGAGACAACGTTGAAGAATTCGTAGGTGCAGGTGAGCATATTGCCGGATAAGTGTAGTTACGCAACTACAATTAAAAAAACACGAGGAACAGA	NaN
HMX1	Native	TGTTTGTATATAAGAGCAACCTCCTCATACTCTCTTGCTTAGTCTAAGGAGGAGCTATTTAACAGTGCACAATATAACACAGCATATATACACACACACACATAAAATAACCGCAAAA	NaN
HSP78	Native	GACTCACGCACACACATATATATACATATATATGCATATGTAAGCATGAAAAGTTTGACTTCTATTATCTATTCCAGGAACCCTGAAACAAGCGAGTGAAAATCTTTCAAGGTTAAAT	10.8686
MET8	Native	ACACACACACACATATATATATATATACATTTACTTCAATAAAAGGCTGTGCCAGACATTTTTGCCATACATTGTTCATGAAGTGTGCAAAATAAGAGAGTGTATAATAGGATAAAAA	12.6029
PDR15	Native	CAAGTATACTACTGTTAAGAACATCACATCACTAATACTATTAGCGTATAACAGTTACTATACGAATATATAAACACACACACACACAAGCAAACACACTTATAATTATCAAAAACCT	7.40506
PFA3	Native	ATATATTACACTTTTATGTGATTGCGTCCAAGAAAAAAAAAAAAACCTATATAACTAAGTCGTACCAAATACAAGACAAAGAAGCCGATCTTGGAATTCGATAGAATCTTTTTCGCAA	7.63307
PHM8	Native	GAAATATATGTTTATATATATATATATATATATATGTATATACGAACTCGGTTTAACGCATAGTTGGTAAAAGATTTAATGTAGATAAAAAACACATAAGTTTTATACGCACGTAATC	NaN
POL12	Native	TTTGTTTCATATACATAATATATTTGCATATAAAAATATCAAGATAATTGATTGTCAATTGGTTCAACAAAGCTTGAAGGTAAATTTAGGCAGGAGCAAGTGACTGAAAAAAAAAAAA	11.268
RAD26	Native	GCTTCATTTCAGTTAAGGGCGATGCAATAAAAGTGGAAGAAAAAAAAAGAAGGGAAGAGGTTTGATAATATATATATATATATATATATAACATTGCTCAGAGAAACATACATCAGTG	NaN
REV7	Native	TTAACTAATATAAACTTTTCCAGAAAGCTAAAAAAAAGGTCGGAAAAAGAAGGTATACGTTTTTGCGACGACTGAGATCCAAGAAGAAAAAAAAAATAGTAATCGTTGCGTCAGCTTT	7.52788
RGS2	Native	AGCGACGAGGCAAGGAAAGAGAAGAAAAAAAAAATATTACATTGGCTATATAAATATCAAAACATCTTAGGTAAGGCACCTTTGATACATAAAACGAAGAAAATTCAGCACATGCCAG	NaN
RPC19	Native	GAAAAAAAAAAAATTTCAAAAGAAAACCATACTAATGCTGAGGTATAAAGTAACGAATTGGGGAAAGGCCATCAATCCAAAGTCGGAAAAATTGAACTTCACATAAAGTACCAGGCAA	8.32986
SCD26	Native	CTTTGTCCTTTCACATTGCACAAAAGTAGAGGAATAATGGATGGATCTAGGATGTACGTATATATGATATTAGCGGTCTGAAGAGAAAAAAAAAACAGCAACAATAACATCGCACTTG	2.37172
SED2	Native	AAAAAAGAAAAGTTGAAAAAAAAAAAATCCAAAAAATTCAAAAACGTGTACAGAAACCTAGAAGGATACGTGATAGAAATACAGATATATAACAAGGTTGAGATACAATCGAGCCACT	7.40284
SES1	Native	CTCAATGAAATTTGAAAAATAGCAGAAAATAAGTTGATAAGATCGCAATGTAATATATATATATATATATATATATTACAATTCGTGAACTGGCACAAGGAAAAGCGTGTAATTAAAA	6.8357
SET6	Native	TGCATTACCGTTTTATGTATCTCTGATATTATAAATGTAGCCCTAGATTTATATGAATATATATATATATATATATACCATTTATATATGCAAACACAAAATAACCTAAAATTTAAAA	NaN
SFG1	Native	TCCACACTTCAGCTATATTTGGAACTTAGGCGCGTTTAGGTGATAAGTTGTTCTGTAAATATGTTTGATTAGTTAAACAAGAGAAATATAAAATTAAGAAAAAAAAAATTTCAAAAAC	NaN
SLS1	Native	CTTTTCTTATTTCAGTGAACTGAAAAAAAAAAAAAAAGTTATGTATCTTTAATGTAATAAAACTAGTACATAATATATACGGAGCTTGAAGGCACTGGAGAAAATATAGAGTAAGCAT	7.42234
SNZ2	Native	ACACACACACACACATATATAAAACTAGTATGTTTCTCCACCATAGTCACATTATTATTCGACCCTTCTAGGAAAGGAACTATAATAGAAAAATAAGTATATCGTAAAAAAGACAAAA	NaN
SRX1	Native	GCGATGCAATACATGTCAAGAGGTGTTGTATATAAACCACAATATCTACCATCAATGAGCTATATATACTTTTCTTACTGAAAAAAAAAACTACAAAACCAAGTAAAAAAAGAACAAT	16.2972
STR2	Native	CATATATTTTGGATATATATATATATATATACCCATATATATAACGATAGTAGAATGACGCTCATGTGCCGATTCGGGACCTACATAAACAAGAGAGAGAAGAGGAACAGAAGAAAAA	NaN
TDA4	Native	AAAAACATACAAGGCAACATAATATTTTGACATAACTCAACGCAACATAACAGTATAAAACATAGTTTAATAAAAGAGAAAAAAAAAACAATATTTTTAAGCTATCGCTCTTGCCGCA	4.86053
TIF51A	Native	TTTCCTAAATTCCTCTCCTTCTATCAATTGCTTCCTTTCCTTCTTTCTAACGATTCTACTTCTGTAGCCAATTACTCATAGACTCCCAAACACACACAAATACCAACTCATATATACA	6.67388
TRG1	Native	TATATATATATATATATATTTTGTTACGCGTGCATTTTCTTGTTGCAAGCAGCATGTCTAATTGGTAATTTTAAAGCTGCCAAGCTCTACATAAAGAAAAACATACATCTATCCCGTT	NaN
UPS1	Native	GCTCTCCCTGGATAATAAGCTAGAAAAAAAAAATATATATGACAGATGGATGAGTAATCATATTCAATAAGTATTGTCTGGCTTCTGAGACGGCGGTAAGATATCCTTAAGAGTTGCA	6.8972
UTP30	Native	TCAAATTTATAAAAAATAATATATATAAAAGGAAAAAAAAAAAAATCGATGCCCTACTAATAGAGATTGGAGCTGAAAAGAAAAAGTGTACATCAAACGCTATATCTCGAGGTTTGGG	NaN
VMA5	Native	AGCAGGATTTGTCACAGTGCTTTAGAAACACAAACAAAGGAGGTATATAGAAGTTGCAGTTGCTAGAGTTTGTTTTCTTACCTAATTCTAGATCAATTCTTTTTTCTGAAAAAAAAAA	7.63868
VPT7	Native	AGAAAAGAGAGAAAAAAAAAAAGAAGGTGGTGTATGTGCGACCACTCAACAAGGCCCAGTGAAGTTAATATATAACGATAAAAGGAGGAGGACGAGAAAGAAGAAGCTGAAAAACACA	5.96992
VTH1	Native	TATATATATATATATATATCCCGTCCGCTTTCTTTTTTTTGTCAGTTGGGTCGCAACGCAGGGTCTCGAGACCTGAAAAAAGCTTCATAGCGATATTAAAGGTAGAGGTACACCCATA	NaN
YAF5	Native	TTCATAGTCCCCTAATTCAATTAATCGAAAAAAAAAAAATAAAATATAAGGGAAGATTGTGCTGATGAAATAGACAATGAAACAATAATGAAGAATAAAGAAGAAGAAGATATAAAAC	3.4614
YAH1	Native	AAATGAATATGTATGCAAAATATATATATGTATATATATGCCTAATATACATAATAATAGAAAAAAAAAACCTCATACGAAATAGGCGCTTCTCGTATCTATACTCAACCCGCCCCCA	NaN
YCAT	Native	CCCCATTTTCGCATATAAGAGCAACTAAACGCCGGTGAGTAAAGTGCCCTTCCCTACAGACTCTTTTACTCAGGTATATATATATATATATCCCTTAAAAACTAAAAAGAAAGCACTC	NaN
YCL012C	Native	GAAAAGCGAAGAAAAAAAAAAAAAAAAAAAGGGTATTCTAAACTGAATATATAAAAACTGCCACCAATTAAGAGAAGAAAAGCTACACAATTAATTTCCAAAAATTGCAAATACGAGT	10.4866
YCL068C	Native	GCAAAGAAGAAAGAATGAGCCCGAAAAACAAATATGTATATATCTGTGTAGAATATATATATATATATATTTCGCAAAAATACATAAACAATCAACCCTCTCCTCAGACACTACTAAG	7.25648
YDL124W	Native	ATATATATATATATATATACGGATATATTGATAGTCGGATACTACGTGGATATGGATACACATGTAAACGGTTGTGTTACCCTAAAGAAACGGAGGTCAGTTAACAACACTTTTACAG	8.74171
YDL241W	Native	ATTAGTACCTATATATATATATATATATATATATATATATATATATTCCTTTATTATAATTCCTATCAGCGATTTTTGCATCACACCCAAGAAAAATCTATAATAGAGACACAAAAAA	NaN
YHB4	Native	ATATATATATATATATAACAATATTGTGGGTTGAGGTGGAGACTTGATTTTTCTTATACAGTATATTCTTGTTCATTTTTTACCATTTTCAACAAACCACACAAAGACTTTATTCATT	NaN
YIH1	Native	CAAGAAAATTGCGTCTTGTGCAGTCATATACGCTGGGATATATATATATATAGATATATATACATATATATAGGAATATGTAACAAGAAAAAAAAAAGAGAGAGGAAAGAAAAGCTCA	NaN
YJL068C	Native	GTGGAAAACATGCGACTGCTAAGGGGAGATCCACACACACACACACAAAAGATCAATACACATTTTTGACAATATATAGCATCAATAAAATACATATAAGCGATTCACATAGTTCAAT	4.96263
YJL118W	Native	CACGCAGGCATCGGTCGTTGGCTGTTGTTATGTCTCAGATAAGCGCGTTTGTTATGCGAAAAAAAAAAACTTTACAGAGGCTTTGTTTATATATAGAAAGACCACGAAAAAAACAGTG	NaN
YJR005C-A	Native	TGCGTACATATATATATATATATAGGATAATGTGTAGTCGTATTATTAACCGCCTTTTGGAAGTTTGCTAACCGCATAGTTGTCATTAGAAACCACCAAACATAGTGAAGAAGCGAAC	13.4403
YKE2	Native	ATGCGAAAGAAAAAAAAAAGTAAAGGCAATAAAACTTCATCAAGTCAAACGTCATCTATAAATAATCCCACTTCAGAATTGAAAAAGACTACATTTGAGTGGAGGAACAAAAGCAAAA	9.11321
YKR045C	Native	TGAATACCAAAGAAAAAATTATAAAAACGAAAAAAAAAAAAAAAAAAAAAAATTTGGTTATAGCTCGATCAAGAGACAATAAAAGTGAATATACATGGTGCCAAGGGAAAGTCCTAGC	NaN
YLR049C	Native	AAGCGCACGCATACATATATATATATATATATATTGTGCTGCACGTATATATAAATAAATCACGCGTACAAGGATACGTTAGCCAAATTCTTTGGATATAACAAAACAGCTACAACTC	11.1046
YNR071C	Native	GTACACTCTATACTTTCAGCATATAAATACAGAGATAAGTTGAAGTTTGATAGCTCAATTGATCAGTTTGTATGATAAGCAGTGAAAAAAAAAATCAAAACAGATAACAAACAGCGAA	20.5246
YOR032W-A	Native	GCGAATGTAGACCGCTAGCGGCTTGATTAGATAAATAGAGTGGGTTAAAAAAAAGGAAAAAAAAAATGTGAATTGCACATGCCCAGCGCGCTCGCAAAACATATAAAGTTGTCCTCAC	NaN
YPL088W	Native	CGTATATATATATATATATATATATATATTAGGACCCAGAGAACAAGGTATCATATATTAATTGTCTTGCCAACTATGTAATTTGGCTGTTACGGAAGACCCACATCAGGCGGCAGAA	NaN
ZPS1	Native	ATTAGAAACGTATAAAAACAAGACAAAATTACTGTCATTGGGGGAGAACAACCCATCTAGGAATTGGGATTGAGCAATTAAGATAGAAAACCAAATCCACACACAACTACTAAACATT	20.5666
RPL16A	Native	GGGCTGCTGTGTAATAATAATTAAATTAGCAATTTAGTAATCACACTGTATAATTGCACGCTATCGTTATACATATTATTTCTCTTTGAAAACGGAAGGTGAAGAACAAATCGAGAAA	6.5163
RPL21A	Native	TTTTATCACCAATGGAGTGTCATGTCTGGTAAAGATAATATAGAAAGTAGTGTGCAATTTCAGGCATTACCGATTGAACTTTGGAATAAGAGAACCAAGACAAAAATAACTAGCAACA	8.96668
RPL21B	Native	TGAGGAGGCCAACTGTATTGCGTTAAAGGCAAAAGGATTGGTATATACGAATGATTGGTAATTTGAAAAGTAGGTTTCGAATCAAAGAAACTGAGACAGTCAAGGACACTAAACAAAA	5.79197
RPL2B	Native	TTTCAATAATCTTTCATACTTGACAAAAGTAGATATACATATTTTAAAAGATTGAGTTACTATTGATAAATCTACTATTTGTCATAAACTCACCAAGAAACCACAAAGTTATTGAACA	10.5302
RPL9A	Native	AGACGCTGGCGCGCCTGTATTGTATAATAGTATATTTTACACTCAATTCAATTTTTTGATATTAAATTAGTGTGTAAAAAGCTTCTGAAATCAAGAAGCCCGTACCAGAAGTTCAATC	6.95753
RPS10B	Native	GTTTTTCAAAACAATATAGGAATTAAAGGTATACGTCTTTGGATACATGTTATTTGAAATGGGGTAGAACTAGCACAACTGAAACCAAGAAAACACAGATCATAACTAACCGTTCAAG	6.33857
RPS19A	Native	ATACCGGAAAGATATAGGTGAAATGAAGAAAACTATGGGTTGTATATCTAATACCCCGGTGCGTTTATTAATATTTTAGCTTGAAAGCGAAGTGATACGATCGACAAATAGAGTAAAA	6.26709
RPS2	Native	TTTAACTTTGTCTCAGCGAAGAAGAATTGAATAACTATAGTGAATTTCAAGAGCTAGAGGATGGTTAGGTATTAGTTCAAAACAAAGATTTCAAGAAACCAACATAGATTAAGCAGAA	6.8765
RPS24A	Native	GCAAGTCATTAACACTATCTATAATTGATATTAGACGTTAAAAGTTCTATATAGCATTTGCTTTTATTTAGAGAATACGAAAACACACCAGATAATTAGTGCATATATATTAGATCAA	6.78674
RPS27B	Native	TTTTCAATCCCAAAGAAACCGTGTTCTTTATATATTGTCGATTGAAAGTTACCTACATCAACTTTCCGTGTTCCATTCCGACTATAACAAACAACCAATAAGCTCAACTAATTAAGTA	10.7349
ARF1_1to8_10snps_1	Randomly_Mutated_Window	CGTAGCCGGGTTTTTATAAGTCTTACTAGATAGAAAGTTCATTTTGTTTTGAAACTTTTTGGAACCTCTGGCATTGAAGGTATAAGAAAGAACTCAAACAGGTTTAATAGAATTAAAA	9.05515
ARF1_9to18_10snps_1	Randomly_Mutated_Window	ATCGAGGTCTAGAACCCGAGTCTTACTAGATAGAAAGTTCATTTTGTTTTGAAACTTTTTGGAACCTCTGGCATTGAAGGTATAAGAAAGAACTCAAACAGGTTTAATAGAATTAAAA	8.15288
ARF1_19to28_10snps_1	Randomly_Mutated_Window	ATCGAGGTGGTTTTTATAGTGAAGTACTGATAGAAAGTTCATTTTGTTTTGAAACTTTTTGGAACCTCTGGCATTGAAGGTATAAGAAAGAACTCAAACAGGTTTAATAGAATTAAAA	9.77795
ARF1_29to38_10snps_1	Randomly_Mutated_Window	ATCGAGGTGGTTTTTATAAGTCTTACTATTGCAGTTAGTCATTTTGTTTTGAAACTTTTTGGAACCTCTGGCATTGAAGGTATAAGAAAGAACTCAAACAGGTTTAATAGAATTAAAA	9.58268
ARF1_39to48_10snps_1	Randomly_Mutated_Window	ATCGAGGTGGTTTTTATAAGTCTTACTAGATAGAAAGTAATCAAGAGGTTGAAACTTTTTGGAACCTCTGGCATTGAAGGTATAAGAAAGAACTCAAACAGGTTTAATAGAATTAAAA	9.81321
ARF1_49to58_10snps_1	Randomly_Mutated_Window	ATCGAGGTGGTTTTTATAAGTCTTACTAGATAGAAAGTTCATTTTGTTCAAGGGTCACTTGGAACCTCTGGCATTGAAGGTATAAGAAAGAACTCAAACAGGTTTAATAGAATTAAAA	9.25727
ARF1_59to68_10snps_1	Randomly_Mutated_Window	ATCGAGGTGGTTTTTATAAGTCTTACTAGATAGAAAGTTCATTTTGTTTTGAAACTTTAGCCGTGGCTTGGCATTGAAGGTATAAGAAAGAACTCAAACAGGTTTAATAGAATTAAAA	8.90121
ARF1_69to78_10snps_1	Randomly_Mutated_Window	ATCGAGGTGGTTTTTATAAGTCTTACTAGATAGAAAGTTCATTTTGTTTTGAAACTTTTTGGAACCTCGATGTACTTGGGTATAAGAAAGAACTCAAACAGGTTTAATAGAATTAAAA	9.69066
ARF1_79to88_10snps_1	Randomly_Mutated_Window	ATCGAGGTGGTTTTTATAAGTCTTACTAGATAGAAAGTTCATTTTGTTTTGAAACTTTTTGGAACCTCTGGCATTGAATCGTGGGCCTAGAACTCAAACAGGTTTAATAGAATTAAAA	8.83269
ARF1_89to98_10snps_1	Randomly_Mutated_Window	ATCGAGGTGGTTTTTATAAGTCTTACTAGATAGAAAGTTCATTTTGTTTTGAAACTTTTTGGAACCTCTGGCATTGAAGGTATAAGAACAGTAAAGCGCAGGTTTAATAGAATTAAAA	9.96726
ARF1_99to108_10snps_1	Randomly_Mutated_Window	ATCGAGGTGGTTTTTATAAGTCTTACTAGATAGAAAGTTCATTTTGTTTTGAAACTTTTTGGAACCTCTGGCATTGAAGGTATAAGAAAGAACTCAAAATCAAGGGTCAGAATTAAAA	10.3229
ARF1_109to118_10snps_1	Randomly_Mutated_Window	ATCGAGGTGGTTTTTATAAGTCTTACTAGATAGAAAGTTCATTTTGTTTTGAAACTTTTTGGAACCTCTGGCATTGAAGGTATAAGAAAGAACTCAAACAGGTTTAATTCCTCGTCCT	7.72072
COX5A_1to8_10snps_1	Randomly_Mutated_Window	TAAACGCCCGAAAAGTTAAAAAGAACAATCAATTAAATAAGAACCATCAGTCCTCGTATTTTGTCTTCTGTTTGCAAGCAATGCACCAAACACAAGATCAACTAAGAACGCATCTACA	6.0591
COX5A_9to18_10snps_1	Randomly_Mutated_Window	AGCGGCGGAACCTGTGGCAAAAGAACAATCAATTAAATAAGAACCATCAGTCCTCGTATTTTGTCTTCTGTTTGCAAGCAATGCACCAAACACAAGATCAACTAAGAACGCATCTACA	6.76683
COX5A_19to28_10snps_1	Randomly_Mutated_Window	AGCGGCGGCGAAAAGTTACTGCTTCAGGTCAATTAAATAAGAACCATCAGTCCTCGTATTTTGTCTTCTGTTTGCAAGCAATGCACCAAACACAAGATCAACTAAGAACGCATCTACA	7.20222
COX5A_29to38_10snps_1	Randomly_Mutated_Window	AGCGGCGGCGAAAAGTTAAAAAGAACAAGTTTAGGTGCAAGAACCATCAGTCCTCGTATTTTGTCTTCTGTTTGCAAGCAATGCACCAAACACAAGATCAACTAAGAACGCATCTACA	6.32351
COX5A_39to48_10snps_1	Randomly_Mutated_Window	AGCGGCGGCGAAAAGTTAAAAAGAACAATCAATTAAATCCTCCAATAGAGTCCTCGTATTTTGTCTTCTGTTTGCAAGCAATGCACCAAACACAAGATCAACTAAGAACGCATCTACA	6.09563
COX5A_49to58_10snps_1	Randomly_Mutated_Window	AGCGGCGGCGAAAAGTTAAAAAGAACAATCAATTAAATAAGAACCATCTTCGAGAAGGTTTTGTCTTCTGTTTGCAAGCAATGCACCAAACACAAGATCAACTAAGAACGCATCTACA	7.18986
COX5A_59to68_10snps_1	Randomly_Mutated_Window	AGCGGCGGCGAAAAGTTAAAAAGAACAATCAATTAAATAAGAACCATCAGTCCTCGTAAAAACCGGATTGTTTGCAAGCAATGCACCAAACACAAGATCAACTAAGAACGCATCTACA	4.72206
COX5A_69to78_10snps_1	Randomly_Mutated_Window	AGCGGCGGCGAAAAGTTAAAAAGAACAATCAATTAAATAAGAACCATCAGTCCTCGTATTTTGTCTTCGTCGATACTCCAATGCACCAAACACAAGATCAACTAAGAACGCATCTACA	7.82819
COX5A_79to88_10snps_1	Randomly_Mutated_Window	AGCGGCGGCGAAAAGTTAAAAAGAACAATCAATTAAATAAGAACCATCAGTCCTCGTATTTTGTCTTCTGTTTGCAAGTCTGTAGGATAACACAAGATCAACTAAGAACGCATCTACA	9.34678
COX5A_89to98_10snps_1	Randomly_Mutated_Window	AGCGGCGGCGAAAAGTTAAAAAGAACAATCAATTAAATAAGAACCATCAGTCCTCGTATTTTGTCTTCTGTTTGCAAGCAATGCACCATTATTCTAGACAACTAAGAACGCATCTACA	7.75357
COX5A_99to108_10snps_1	Randomly_Mutated_Window	AGCGGCGGCGAAAAGTTAAAAAGAACAATCAATTAAATAAGAACCATCAGTCCTCGTATTTTGTCTTCTGTTTGCAAGCAATGCACCAAACACAAGATATGTGTCTGGCGCATCTACA	NaN
COX5A_109to118_10snps_1	Randomly_Mutated_Window	AGCGGCGGCGAAAAGTTAAAAAGAACAATCAATTAAATAAGAACCATCAGTCCTCGTATTTTGTCTTCTGTTTGCAAGCAATGCACCAAACACAAGATCAACTAAGAAGAGTGTGGGG	7.18902
GAL7_1to8_10snps_1	Randomly_Mutated_Window	ATCTATGATTCAGTTAGTTTGGCTAGCAAAGATATAAAAGCAGGTCGGAAATATTTATGGGCATTATTATGCAGAGCATCAACATGATAAAAAAAAACAGTTGAATATTCCCTCAAAA	13.7962
GAL7_9to18_10snps_1	Randomly_Mutated_Window	TAGCTATGCAAGTGAGAGTTGGCTAGCAAAGATATAAAAGCAGGTCGGAAATATTTATGGGCATTATTATGCAGAGCATCAACATGATAAAAAAAAACAGTTGAATATTCCCTCAAAA	13.2319
GAL7_19to28_10snps_1	Randomly_Mutated_Window	TAGCTATGTTCAGTTAGTCCATAGTCTCAAGATATAAAAGCAGGTCGGAAATATTTATGGGCATTATTATGCAGAGCATCAACATGATAAAAAAAAACAGTTGAATATTCCCTCAAAA	12.1261
GAL7_29to38_10snps_1	Randomly_Mutated_Window	TAGCTATGTTCAGTTAGTTTGGCTAGCAGCACAGCTTGAGCAGGTCGGAAATATTTATGGGCATTATTATGCAGAGCATCAACATGATAAAAAAAAACAGTTGAATATTCCCTCAAAA	3.10336
GAL7_39to48_10snps_1	Randomly_Mutated_Window	TAGCTATGTTCAGTTAGTTTGGCTAGCAAAGATATAAAGCTTTTAGCCAAATATTTATGGGCATTATTATGCAGAGCATCAACATGATAAAAAAAAACAGTTGAATATTCCCTCAAAA	6.42547
GAL7_49to58_10snps_1	Randomly_Mutated_Window	TAGCTATGTTCAGTTAGTTTGGCTAGCAAAGATATAAAAGCAGGTCGGCCGCGAGCGGGGGCATTATTATGCAGAGCATCAACATGATAAAAAAAAACAGTTGAATATTCCCTCAAAA	9.57628
GAL7_59to68_10snps_1	Randomly_Mutated_Window	TAGCTATGTTCAGTTAGTTTGGCTAGCAAAGATATAAAAGCAGGTCGGAAATATTTATCACACAGTGCATGCAGAGCATCAACATGATAAAAAAAAACAGTTGAATATTCCCTCAAAA	13.112
GAL7_69to78_10snps_1	Randomly_Mutated_Window	TAGCTATGTTCAGTTAGTTTGGCTAGCAAAGATATAAAAGCAGGTCGGAAATATTTATGGGCATTATTGACTCTCCATTCAACATGATAAAAAAAAACAGTTGAATATTCCCTCAAAA	17.6533
GAL7_79to88_10snps_1	Randomly_Mutated_Window	TAGCTATGTTCAGTTAGTTTGGCTAGCAAAGATATAAAAGCAGGTCGGAAATATTTATGGGCATTATTATGCAGAGCAATCGTGATCGAAAAAAAAACAGTTGAATATTCCCTCAAAA	12.2664
GAL7_89to98_10snps_1	Randomly_Mutated_Window	TAGCTATGTTCAGTTAGTTTGGCTAGCAAAGATATAAAAGCAGGTCGGAAATATTTATGGGCATTATTATGCAGAGCATCAACATGATCTGGCCTCGTAGTTGAATATTCCCTCAAAA	9.3956
GAL7_99to108_10snps_1	Randomly_Mutated_Window	TAGCTATGTTCAGTTAGTTTGGCTAGCAAAGATATAAAAGCAGGTCGGAAATATTTATGGGCATTATTATGCAGAGCATCAACATGATAAAAAAAAACTACATCCAGGTCCCTCAAAA	13.7131
GAL7_109to118_10snps_1	Randomly_Mutated_Window	TAGCTATGTTCAGTTAGTTTGGCTAGCAAAGATATAAAAGCAGGTCGGAAATATTTATGGGCATTATTATGCAGAGCATCAACATGATAAAAAAAAACAGTTGAATATATGTGTCTCC	NaN
HSP12_1to8_10snps_1	Randomly_Mutated_Window	GGAGAGATAATTGCGTTTGATCTTATTTAATCTCTCTCTAATATATAGAAAAAAAAACCATCTGATTATTCGATAATCTCAAACAAACAACTCAAAACAAAAAAAACTAAATACAACA	10.8447
HSP12_9to18_10snps_1	Randomly_Mutated_Window	ACTTCCTCGGAAAGAGCCGATCTTATTTAATCTCTCTCTAATATATAGAAAAAAAAACCATCTGATTATTCGATAATCTCAAACAAACAACTCAAAACAAAAAAAACTAAATACAACA	12.695
HSP12_19to28_10snps_1	Randomly_Mutated_Window	ACTTCCTCAATTGCGTTTTCGGGCGGAGAATCTCTCTCTAATATATAGAAAAAAAAACCATCTGATTATTCGATAATCTCAAACAAACAACTCAAAACAAAAAAAACTAAATACAACA	NaN
HSP12_29to38_10snps_1	Randomly_Mutated_Window	ACTTCCTCAATTGCGTTTGATCTTATTTCCGAAAGGCATAATATATAGAAAAAAAAACCATCTGATTATTCGATAATCTCAAACAAACAACTCAAAACAAAAAAAACTAAATACAACA	8.74714
HSP12_39to48_10snps_1	Randomly_Mutated_Window	ACTTCCTCAATTGCGTTTGATCTTATTTAATCTCTCTCGCCCCCCAGCAAAAAAAAACCATCTGATTATTCGATAATCTCAAACAAACAACTCAAAACAAAAAAAACTAAATACAACA	11.1935
HSP12_49to58_10snps_1	Randomly_Mutated_Window	ACTTCCTCAATTGCGTTTGATCTTATTTAATCTCTCTCTAATATATAGTGCCTTCCGTCATCTGATTATTCGATAATCTCAAACAAACAACTCAAAACAAAAAAAACTAAATACAACA	11.5881
HSP12_59to68_10snps_1	Randomly_Mutated_Window	ACTTCCTCAATTGCGTTTGATCTTATTTAATCTCTCTCTAATATATAGAAAAAAAAACATAACATAAGTTCGATAATCTCAAACAAACAACTCAAAACAAAAAAAACTAAATACAACA	11.4054
HSP12_69to78_10snps_1	Randomly_Mutated_Window	ACTTCCTCAATTGCGTTTGATCTTATTTAATCTCTCTCTAATATATAGAAAAAAAAACCATCTGATTAACACGATTAGTCAAACAAACAACTCAAAACAAAAAAAACTAAATACAACA	NaN
HSP12_79to88_10snps_1	Randomly_Mutated_Window	ACTTCCTCAATTGCGTTTGATCTTATTTAATCTCTCTCTAATATATAGAAAAAAAAACCATCTGATTATTCGATAATCATCTCTTGCAAACTCAAAACAAAAAAAACTAAATACAACA	10.7789
HSP12_89to98_10snps_1	Randomly_Mutated_Window	ACTTCCTCAATTGCGTTTGATCTTATTTAATCTCTCTCTAATATATAGAAAAAAAAACCATCTGATTATTCGATAATCTCAAACAAACTGGCGGTTCGAAAAAAAACTAAATACAACA	10.9115
HSP12_99to108_10snps_1	Randomly_Mutated_Window	ACTTCCTCAATTGCGTTTGATCTTATTTAATCTCTCTCTAATATATAGAAAAAAAAACCATCTGATTATTCGATAATCTCAAACAAACAACTCAAAACTTCCGGTTGCAAATACAACA	12.2669
HSP12_109to118_10snps_1	Randomly_Mutated_Window	ACTTCCTCAATTGCGTTTGATCTTATTTAATCTCTCTCTAATATATAGAAAAAAAAACCATCTGATTATTCGATAATCTCAAACAAACAACTCAAAACAAAAAAAACTGGGGCTTGAG	10.6956
HXT1_1to8_10snps_1	Randomly_Mutated_Window	AGGGCAGGAAAGGCAACAATGTCCCCATAATCAATTCCATCTGGGGTCTCATGTTCTTTCCCCACCTTAAAATCTATAAAGATATCATAATCGTCAACTAGTTGATATACGTAAAATC	1.91636
HXT1_9to18_10snps_1	Randomly_Mutated_Window	TTATATATGGCTATGTTCATGTCCCCATAATCAATTCCATCTGGGGTCTCATGTTCTTTCCCCACCTTAAAATCTATAAAGATATCATAATCGTCAACTAGTTGATATACGTAAAATC	4.90754
HXT1_19to28_10snps_1	Randomly_Mutated_Window	TTATATATAAAGGCAACAGCTCGTTGGGAATCAATTCCATCTGGGGTCTCATGTTCTTTCCCCACCTTAAAATCTATAAAGATATCATAATCGTCAACTAGTTGATATACGTAAAATC	10.9897
HXT1_29to38_10snps_1	Randomly_Mutated_Window	TTATATATAAAGGCAACAATGTCCCCATTCAGTTAAGGATCTGGGGTCTCATGTTCTTTCCCCACCTTAAAATCTATAAAGATATCATAATCGTCAACTAGTTGATATACGTAAAATC	10.4621
HXT1_39to48_10snps_1	Randomly_Mutated_Window	TTATATATAAAGGCAACAATGTCCCCATAATCAATTCCGATCTCTCCTTCATGTTCTTTCCCCACCTTAAAATCTATAAAGATATCATAATCGTCAACTAGTTGATATACGTAAAATC	11.4536
HXT1_49to58_10snps_1	Randomly_Mutated_Window	TTATATATAAAGGCAACAATGTCCCCATAATCAATTCCATCTGGGGTCAATCCAATGCTCCCCACCTTAAAATCTATAAAGATATCATAATCGTCAACTAGTTGATATACGTAAAATC	5.71187
HXT1_59to68_10snps_1	Randomly_Mutated_Window	TTATATATAAAGGCAACAATGTCCCCATAATCAATTCCATCTGGGGTCTCATGTTCTTGTATACTTCCAAAATCTATAAAGATATCATAATCGTCAACTAGTTGATATACGTAAAATC	11.1361
HXT1_69to78_10snps_1	Randomly_Mutated_Window	TTATATATAAAGGCAACAATGTCCCCATAATCAATTCCATCTGGGGTCTCATGTTCTTTCCCCACCTTCGTCCACTCTAAGATATCATAATCGTCAACTAGTTGATATACGTAAAATC	11.9519
HXT1_79to88_10snps_1	Randomly_Mutated_Window	TTATATATAAAGGCAACAATGTCCCCATAATCAATTCCATCTGGGGTCTCATGTTCTTTCCCCACCTTAAAATCTATACTACATGATCAATCGTCAACTAGTTGATATACGTAAAATC	NaN
HXT1_89to98_10snps_1	Randomly_Mutated_Window	TTATATATAAAGGCAACAATGTCCCCATAATCAATTCCATCTGGGGTCTCATGTTCTTTCCCCACCTTAAAATCTATAAAGATATCATGTCTAATGGGTAGTTGATATACGTAAAATC	NaN
HXT1_99to108_10snps_1	Randomly_Mutated_Window	TTATATATAAAGGCAACAATGTCCCCATAATCAATTCCATCTGGGGTCTCATGTTCTTTCCCCACCTTAAAATCTATAAAGATATCATAATCGTCAACCCCGGACCCAACGTAAAATC	13.9756
HXT1_109to118_10snps_1	Randomly_Mutated_Window	TTATATATAAAGGCAACAATGTCCCCATAATCAATTCCATCTGGGGTCTCATGTTCTTTCCCCACCTTAAAATCTATAAAGATATCATAATCGTCAACTAGTTGATATTGAGTCTGGG	16.3149
ILV3_1to8_10snps_1	Randomly_Mutated_Window	GAACAGCGATATAATGTAACAAAAGAAGAGACTGAAGTTTTATTATGCATTGTAGCGCCTGTAATCTTTAGTAACGGATTCTTGTATTTTTTTGTAAACAGCCAAGAAAAAAGTAGAG	NaN
ILV3_9to18_10snps_1	Randomly_Mutated_Window	AGTATATTTGGGTTGTGCACAAAAGAAGAGACTGAAGTTTTATTATGCATTGTAGCGCCTGTAATCTTTAGTAACGGATTCTTGTATTTTTTTGTAAACAGCCAAGAAAAAAGTAGAG	6.03861
ILV3_19to28_10snps_1	Randomly_Mutated_Window	AGTATATTATATAATGTAGTTGGTACCAAGACTGAAGTTTTATTATGCATTGTAGCGCCTGTAATCTTTAGTAACGGATTCTTGTATTTTTTTGTAAACAGCCAAGAAAAAAGTAGAG	8.79742
ILV3_29to38_10snps_1	Randomly_Mutated_Window	AGTATATTATATAATGTAACAAAAGAAGGCTGAAGTAGTTTATTATGCATTGTAGCGCCTGTAATCTTTAGTAACGGATTCTTGTATTTTTTTGTAAACAGCCAAGAAAAAAGTAGAG	9.0088
ILV3_39to48_10snps_1	Randomly_Mutated_Window	AGTATATTATATAATGTAACAAAAGAAGAGACTGAAGTGCGCGCTGTAATTGTAGCGCCTGTAATCTTTAGTAACGGATTCTTGTATTTTTTTGTAAACAGCCAAGAAAAAAGTAGAG	7.77812
ILV3_49to58_10snps_1	Randomly_Mutated_Window	AGTATATTATATAATGTAACAAAAGAAGAGACTGAAGTTTTATTATGCCGACCTTTAACTGTAATCTTTAGTAACGGATTCTTGTATTTTTTTGTAAACAGCCAAGAAAAAAGTAGAG	10.2347
ILV3_59to68_10snps_1	Randomly_Mutated_Window	AGTATATTATATAATGTAACAAAAGAAGAGACTGAAGTTTTATTATGCATTGTAGCGCACAACTAGCATAGTAACGGATTCTTGTATTTTTTTGTAAACAGCCAAGAAAAAAGTAGAG	6.24369
ILV3_69to78_10snps_1	Randomly_Mutated_Window	AGTATATTATATAATGTAACAAAAGAAGAGACTGAAGTTTTATTATGCATTGTAGCGCCTGTAATCTTGTTGTTTCATTTCTTGTATTTTTTTGTAAACAGCCAAGAAAAAAGTAGAG	9.27591
ILV3_79to88_10snps_1	Randomly_Mutated_Window	AGTATATTATATAATGTAACAAAAGAAGAGACTGAAGTTTTATTATGCATTGTAGCGCCTGTAATCTTTAGTAACGGACCACCCGTACTTTTTGTAAACAGCCAAGAAAAAAGTAGAG	7.25715
ILV3_89to98_10snps_1	Randomly_Mutated_Window	AGTATATTATATAATGTAACAAAAGAAGAGACTGAAGTTTTATTATGCATTGTAGCGCCTGTAATCTTTAGTAACGGATTCTTGTATTGAAACAGTTCCAGCCAAGAAAAAAGTAGAG	9.62085
ILV3_99to108_10snps_1	Randomly_Mutated_Window	AGTATATTATATAATGTAACAAAAGAAGAGACTGAAGTTTTATTATGCATTGTAGCGCCTGTAATCTTTAGTAACGGATTCTTGTATTTTTTTGTAAATTAGTTCACCAAAAGTAGAG	8.82195
ILV3_109to118_10snps_1	Randomly_Mutated_Window	AGTATATTATATAATGTAACAAAAGAAGAGACTGAAGTTTTATTATGCATTGTAGCGCCTGTAATCTTTAGTAACGGATTCTTGTATTTTTTTGTAAACAGCCAAGAATTCGTGCTCT	8.50614
PFK2_1to8_10snps_1	Randomly_Mutated_Window	AGGGGCAGTTTTTTTTTTTTTCCTTCTTCTTGCTTAAAAGCCTTTCTTATACCTCATTTGAACAATAGAACTAGATTTAGAGACTAGTTTAGCATTGGCCAAGAACTAACCATACGCA	10.0424
PFK2_9to18_10snps_1	Randomly_Mutated_Window	TTCCTTTTGACGGGGAGCTTTCCTTCTTCTTGCTTAAAAGCCTTTCTTATACCTCATTTGAACAATAGAACTAGATTTAGAGACTAGTTTAGCATTGGCCAAGAACTAACCATACGCA	8.93978
PFK2_19to28_10snps_1	Randomly_Mutated_Window	TTCCTTTTTTTTTTTTTTAACTAGGTGACTTGCTTAAAAGCCTTTCTTATACCTCATTTGAACAATAGAACTAGATTTAGAGACTAGTTTAGCATTGGCCAAGAACTAACCATACGCA	8.58928
PFK2_29to38_10snps_1	Randomly_Mutated_Window	TTCCTTTTTTTTTTTTTTTTTCCTTCTTTAGTTCCCCCAGCCTTTCTTATACCTCATTTGAACAATAGAACTAGATTTAGAGACTAGTTTAGCATTGGCCAAGAACTAACCATACGCA	NaN
PFK2_39to48_10snps_1	Randomly_Mutated_Window	TTCCTTTTTTTTTTTTTTTTTCCTTCTTCTTGCTTAAATTATACGTACATACCTCATTTGAACAATAGAACTAGATTTAGAGACTAGTTTAGCATTGGCCAAGAACTAACCATACGCA	8.88145
PFK2_49to58_10snps_1	Randomly_Mutated_Window	TTCCTTTTTTTTTTTTTTTTTCCTTCTTCTTGCTTAAAAGCCTTTCTTGACATGGGGATGAACAATAGAACTAGATTTAGAGACTAGTTTAGCATTGGCCAAGAACTAACCATACGCA	NaN
PFK2_59to68_10snps_1	Randomly_Mutated_Window	TTCCTTTTTTTTTTTTTTTTTCCTTCTTCTTGCTTAAAAGCCTTTCTTATACCTCATTCTTCTCCAGTAACTAGATTTAGAGACTAGTTTAGCATTGGCCAAGAACTAACCATACGCA	11.3292
PFK2_69to78_10snps_1	Randomly_Mutated_Window	TTCCTTTTTTTTTTTTTTTTTCCTTCTTCTTGCTTAAAAGCCTTTCTTATACCTCATTTGAACAATAGGTGCTAGAAGAGAGACTAGTTTAGCATTGGCCAAGAACTAACCATACGCA	NaN
PFK2_79to88_10snps_1	Randomly_Mutated_Window	TTCCTTTTTTTTTTTTTTTTTCCTTCTTCTTGCTTAAAAGCCTTTCTTATACCTCATTTGAACAATAGAACTAGATTTTTGTCGGTCATTAGCATTGGCCAAGAACTAACCATACGCA	NaN
PFK2_89to98_10snps_1	Randomly_Mutated_Window	TTCCTTTTTTTTTTTTTTTTTCCTTCTTCTTGCTTAAAAGCCTTTCTTATACCTCATTTGAACAATAGAACTAGATTTAGAGACTAGTGAGCGCAAAACCAAGAACTAACCATACGCA	NaN
PFK2_99to108_10snps_1	Randomly_Mutated_Window	TTCCTTTTTTTTTTTTTTTTTCCTTCTTCTTGCTTAAAAGCCTTTCTTATACCTCATTTGAACAATAGAACTAGATTTAGAGACTAGTTTAGCATTGGTTCCCGTAACACCATACGCA	9.31068
PFK2_109to118_10snps_1	Randomly_Mutated_Window	TTCCTTTTTTTTTTTTTTTTTCCTTCTTCTTGCTTAAAAGCCTTTCTTATACCTCATTTGAACAATAGAACTAGATTTAGAGACTAGTTTAGCATTGGCCAAGAACTATGGGCTGAAC	NaN
RPA12_1to8_10snps_1	Randomly_Mutated_Window	GCTCGCGGGAAAAAAAAAAAAATCAAATTTATGTCAAGTGAAGGGCATTGCATGGCAAGTGTAAAGAATCCAAGAAGAAAAGAAAGGCTTAAAGCAATCCAGGTTAGTACTTATAAGA	7.20575
RPA12_9to18_10snps_1	Randomly_Mutated_Window	AAAAATATATGTCTGTGTAAAATCAAATTTATGTCAAGTGAAGGGCATTGCATGGCAAGTGTAAAGAATCCAAGAAGAAAAGAAAGGCTTAAAGCAATCCAGGTTAGTACTTATAAGA	7.81916
RPA12_19to28_10snps_1	Randomly_Mutated_Window	AAAAATATGAAAAAAAAACTCTCTGGCGTTATGTCAAGTGAAGGGCATTGCATGGCAAGTGTAAAGAATCCAAGAAGAAAAGAAAGGCTTAAAGCAATCCAGGTTAGTACTTATAAGA	7.37935
RPA12_29to38_10snps_1	Randomly_Mutated_Window	AAAAATATGAAAAAAAAAAAAATCAAATGATATCATTCTGAAGGGCATTGCATGGCAAGTGTAAAGAATCCAAGAAGAAAAGAAAGGCTTAAAGCAATCCAGGTTAGTACTTATAAGA	7.52543
RPA12_39to48_10snps_1	Randomly_Mutated_Window	AAAAATATGAAAAAAAAAAAAATCAAATTTATGTCAAGAACTATTGGCTGCATGGCAAGTGTAAAGAATCCAAGAAGAAAAGAAAGGCTTAAAGCAATCCAGGTTAGTACTTATAAGA	8.03542
RPA12_49to58_10snps_1	Randomly_Mutated_Window	AAAAATATGAAAAAAAAAAAAATCAAATTTATGTCAAGTGAAGGGCATGTACGATTTGGTGTAAAGAATCCAAGAAGAAAAGAAAGGCTTAAAGCAATCCAGGTTAGTACTTATAAGA	7.97157
RPA12_59to68_10snps_1	Randomly_Mutated_Window	AAAAATATGAAAAAAAAAAAAATCAAATTTATGTCAAGTGAAGGGCATTGCATGGCAACACCCTTTGTTCCAAGAAGAAAAGAAAGGCTTAAAGCAATCCAGGTTAGTACTTATAAGA	8.06046
RPA12_69to78_10snps_1	Randomly_Mutated_Window	AAAAATATGAAAAAAAAAAAAATCAAATTTATGTCAAGTGAAGGGCATTGCATGGCAAGTGTAAAGAAGGGTCACTACAAAGAAAGGCTTAAAGCAATCCAGGTTAGTACTTATAAGA	NaN
RPA12_79to88_10snps_1	Randomly_Mutated_Window	AAAAATATGAAAAAAAAAAAAATCAAATTTATGTCAAGTGAAGGGCATTGCATGGCAAGTGTAAAGAATCCAAGAAGATGCACTGCCATTAAAGCAATCCAGGTTAGTACTTATAAGA	1.93655
RPA12_89to98_10snps_1	Randomly_Mutated_Window	AAAAATATGAAAAAAAAAAAAATCAAATTTATGTCAAGTGAAGGGCATTGCATGGCAAGTGTAAAGAATCCAAGAAGAAAAGAAAGGCCGTCTTTTGGCCAGGTTAGTACTTATAAGA	3.79283
RPA12_99to108_10snps_1	Randomly_Mutated_Window	AAAAATATGAAAAAAAAAAAAATCAAATTTATGTCAAGTGAAGGGCATTGCATGGCAAGTGTAAAGAATCCAAGAAGAAAAGAAAGGCTTAAAGCAATGTGATAGCTCACTTATAAGA	NaN
RPA12_109to118_10snps_1	Randomly_Mutated_Window	AAAAATATGAAAAAAAAAAAAATCAAATTTATGTCAAGTGAAGGGCATTGCATGGCAAGTGTAAAGAATCCAAGAAGAAAAGAAAGGCTTAAAGCAATCCAGGTTAGTTGACTGGCAC	NaN
RPB10_1to8_10snps_1	Randomly_Mutated_Window	TCCGGGACAGAAAAAAAAAAAGAAACATTGAATAAAATCACAATGGGATGATAGTTAAAGTGTATTCAAACTGTAGAGTGTAGAACGTAAACCTCAATAAGCAAAATAATAATACAAA	7.39238
RPB10_9to18_10snps_1	Randomly_Mutated_Window	ATTTCATAGTTGGGGTTTAAAGAAACATTGAATAAAATCACAATGGGATGATAGTTAAAGTGTATTCAAACTGTAGAGTGTAGAACGTAAACCTCAATAAGCAAAATAATAATACAAA	5.63981
RPB10_19to28_10snps_1	Randomly_Mutated_Window	ATTTCATAAGAAAAAAAACCCTCGTAGGTGAATAAAATCACAATGGGATGATAGTTAAAGTGTATTCAAACTGTAGAGTGTAGAACGTAAACCTCAATAAGCAAAATAATAATACAAA	5.55088
RPB10_29to38_10snps_1	Randomly_Mutated_Window	ATTTCATAAGAAAAAAAAAAAGAAACATATCCGTTCCGCACAATGGGATGATAGTTAAAGTGTATTCAAACTGTAGAGTGTAGAACGTAAACCTCAATAAGCAAAATAATAATACAAA	6.69352
RPB10_39to48_10snps_1	Randomly_Mutated_Window	ATTTCATAAGAAAAAAAAAAAGAAACATTGAATAAAATGTGTGCAACCTGATAGTTAAAGTGTATTCAAACTGTAGAGTGTAGAACGTAAACCTCAATAAGCAAAATAATAATACAAA	6.95825
RPB10_49to58_10snps_1	Randomly_Mutated_Window	ATTTCATAAGAAAAAAAAAAAGAAACATTGAATAAAATCACAATGGGAATTCGACATCAGTGTATTCAAACTGTAGAGTGTAGAACGTAAACCTCAATAAGCAAAATAATAATACAAA	5.80222
RPB10_59to68_10snps_1	Randomly_Mutated_Window	ATTTCATAAGAAAAAAAAAAAGAAACATTGAATAAAATCACAATGGGATGATAGTTAAGAGCGCCGAGAACTGTAGAGTGTAGAACGTAAACCTCAATAAGCAAAATAATAATACAAA	7.3261
RPB10_69to78_10snps_1	Randomly_Mutated_Window	ATTTCATAAGAAAAAAAAAAAGAAACATTGAATAAAATCACAATGGGATGATAGTTAAAGTGTATTCACTGCCCTTTCTGTAGAACGTAAACCTCAATAAGCAAAATAATAATACAAA	6.90019
RPB10_79to88_10snps_1	Randomly_Mutated_Window	ATTTCATAAGAAAAAAAAAAAGAAACATTGAATAAAATCACAATGGGATGATAGTTAAAGTGTATTCAAACTGTAGAGGACTTCCATCAAACCTCAATAAGCAAAATAATAATACAAA	7.20965
RPB10_89to98_10snps_1	Randomly_Mutated_Window	ATTTCATAAGAAAAAAAAAAAGAAACATTGAATAAAATCACAATGGGATGATAGTTAAAGTGTATTCAAACTGTAGAGTGTAGAACGTTCCGGAAGTGAAGCAAAATAATAATACAAA	7.63157
RPB10_99to108_10snps_1	Randomly_Mutated_Window	ATTTCATAAGAAAAAAAAAAAGAAACATTGAATAAAATCACAATGGGATGATAGTTAAAGTGTATTCAAACTGTAGAGTGTAGAACGTAAACCTCAATCGAGGTCTACATAATACAAA	3.24705
RPB10_109to118_10snps_1	Randomly_Mutated_Window	ATTTCATAAGAAAAAAAAAAAGAAACATTGAATAAAATCACAATGGGATGATAGTTAAAGTGTATTCAAACTGTAGAGTGTAGAACGTAAACCTCAATAAGCAAAATATGTTCCGTCC	NaN
RPL14A_1to8_10snps_1	Randomly_Mutated_Window	AGGCCCGCAACTGAAAAAAAAGTAATCTAAGGTTAAGTTGATCAGGTCTGCCGATTGTATAACAAATTTAATTGTTTGTCTTAGTGAACAAAGAGAGTCGTGAAAAATAAAATAAACA	8.25074
RPL14A_9to18_10snps_1	Randomly_Mutated_Window	TACTATTGGGTCCTTTGGAAAGTAATCTAAGGTTAAGTTGATCAGGTCTGCCGATTGTATAACAAATTTAATTGTTTGTCTTAGTGAACAAAGAGAGTCGTGAAAAATAAAATAAACA	8.3173
RPL14A_19to28_10snps_1	Randomly_Mutated_Window	TACTATTGAACTGAAAAAGGCCCGTCTGAAGGTTAAGTTGATCAGGTCTGCCGATTGTATAACAAATTTAATTGTTTGTCTTAGTGAACAAAGAGAGTCGTGAAAAATAAAATAAACA	NaN
RPL14A_29to38_10snps_1	Randomly_Mutated_Window	TACTATTGAACTGAAAAAAAAGTAATCTTGTAGCTCCCTGATCAGGTCTGCCGATTGTATAACAAATTTAATTGTTTGTCTTAGTGAACAAAGAGAGTCGTGAAAAATAAAATAAACA	7.72795
RPL14A_39to48_10snps_1	Randomly_Mutated_Window	TACTATTGAACTGAAAAAAAAGTAATCTAAGGTTAAGTCTGGATTCCATGCCGATTGTATAACAAATTTAATTGTTTGTCTTAGTGAACAAAGAGAGTCGTGAAAAATAAAATAAACA	7.59811
RPL14A_49to58_10snps_1	Randomly_Mutated_Window	TACTATTGAACTGAAAAAAAAGTAATCTAAGGTTAAGTTGATCAGGTCCTAGCCCATGATAACAAATTTAATTGTTTGTCTTAGTGAACAAAGAGAGTCGTGAAAAATAAAATAAACA	8.10434
RPL14A_59to68_10snps_1	Randomly_Mutated_Window	TACTATTGAACTGAAAAAAAAGTAATCTAAGGTTAAGTTGATCAGGTCTGCCGATTGTTGTGTCTGGGTAATTGTTTGTCTTAGTGAACAAAGAGAGTCGTGAAAAATAAAATAAACA	7.47492
RPL14A_69to78_10snps_1	Randomly_Mutated_Window	TACTATTGAACTGAAAAAAAAGTAATCTAAGGTTAAGTTGATCAGGTCTGCCGATTGTATAACAAATTGCTGGACCCATCTTAGTGAACAAAGAGAGTCGTGAAAAATAAAATAAACA	8.37084
RPL14A_79to88_10snps_1	Randomly_Mutated_Window	TACTATTGAACTGAAAAAAAAGTAATCTAAGGTTAAGTTGATCAGGTCTGCCGATTGTATAACAAATTTAATTGTTTGAGAGCCCTTCCAAAGAGAGTCGTGAAAAATAAAATAAACA	8.25023
RPL14A_89to98_10snps_1	Randomly_Mutated_Window	TACTATTGAACTGAAAAAAAAGTAATCTAAGGTTAAGTTGATCAGGTCTGCCGATTGTATAACAAATTTAATTGTTTGTCTTAGTGAATGTGCCAGTCCGTGAAAAATAAAATAAACA	5.4297
RPL14A_99to108_10snps_1	Randomly_Mutated_Window	TACTATTGAACTGAAAAAAAAGTAATCTAAGGTTAAGTTGATCAGGTCTGCCGATTGTATAACAAATTTAATTGTTTGTCTTAGTGAACAAAGAGAGTGTGTTCCTCAAAAATAAACA	8.42635
RPL14A_109to118_10snps_1	Randomly_Mutated_Window	TACTATTGAACTGAAAAAAAAGTAATCTAAGGTTAAGTTGATCAGGTCTGCCGATTGTATAACAAATTTAATTGTTTGTCTTAGTGAACAAAGAGAGTCGTGAAAAATGCTGGCCCAT	NaN
RPL28_1to8_10snps_1	Randomly_Mutated_Window	GCCTGTAATCATCTGTATCCCGTATATTTAAGATGGCGTTTGCTTTCTCCGTTGATTTTTTTCCTTCTTAGTGATTTTTTTGCATTAAATCCCAGAACAATCATCCAACTAATCAAGA	15.45
RPL28_9to18_10snps_1	Randomly_Mutated_Window	CAAACCTTGGGGTATGGCCCCGTATATTTAAGATGGCGTTTGCTTTCTCCGTTGATTTTTTTCCTTCTTAGTGATTTTTTTGCATTAAATCCCAGAACAATCATCCAACTAATCAAGA	12.8734
RPL28_19to28_10snps_1	Randomly_Mutated_Window	CAAACCTTTCATCTGTATAGAAACATCATAAGATGGCGTTTGCTTTCTCCGTTGATTTTTTTCCTTCTTAGTGATTTTTTTGCATTAAATCCCAGAACAATCATCCAACTAATCAAGA	8.55222
RPL28_29to38_10snps_1	Randomly_Mutated_Window	CAAACCTTTCATCTGTATCCCGTATATTGTCATCAAAATTTGCTTTCTCCGTTGATTTTTTTCCTTCTTAGTGATTTTTTTGCATTAAATCCCAGAACAATCATCCAACTAATCAAGA	8.12607
RPL28_39to48_10snps_1	Randomly_Mutated_Window	CAAACCTTTCATCTGTATCCCGTATATTTAAGATGGCGGACTGGGGTACCGTTGATTTTTTTCCTTCTTAGTGATTTTTTTGCATTAAATCCCAGAACAATCATCCAACTAATCAAGA	13.2445
RPL28_49to58_10snps_1	Randomly_Mutated_Window	CAAACCTTTCATCTGTATCCCGTATATTTAAGATGGCGTTTGCTTTCTAGCCGCGAAATTTTCCTTCTTAGTGATTTTTTTGCATTAAATCCCAGAACAATCATCCAACTAATCAAGA	12.6198
RPL28_59to68_10snps_1	Randomly_Mutated_Window	CAAACCTTTCATCTGTATCCCGTATATTTAAGATGGCGTTTGCTTTCTCCGTTGATTTCCCATGGAAGTAGTGATTTTTTTGCATTAAATCCCAGAACAATCATCCAACTAATCAAGA	12.0206
RPL28_69to78_10snps_1	Randomly_Mutated_Window	CAAACCTTTCATCTGTATCCCGTATATTTAAGATGGCGTTTGCTTTCTCCGTTGATTTTTTTCCTTCTAGTCCGGGCCTTTGCATTAAATCCCAGAACAATCATCCAACTAATCAAGA	12.2516
RPL28_79to88_10snps_1	Randomly_Mutated_Window	CAAACCTTTCATCTGTATCCCGTATATTTAAGATGGCGTTTGCTTTCTCCGTTGATTTTTTTCCTTCTTAGTGATTTTCAGTACCCCTATCCCAGAACAATCATCCAACTAATCAAGA	13.6984
RPL28_89to98_10snps_1	Randomly_Mutated_Window	CAAACCTTTCATCTGTATCCCGTATATTTAAGATGGCGTTTGCTTTCTCCGTTGATTTTTTTCCTTCTTAGTGATTTTTTTGCATTAACCTTGGCCCGAATCATCCAACTAATCAAGA	14.4615
RPL28_99to108_10snps_1	Randomly_Mutated_Window	CAAACCTTTCATCTGTATCCCGTATATTTAAGATGGCGTTTGCTTTCTCCGTTGATTTTTTTCCTTCTTAGTGATTTTTTTGCATTAAATCCCAGAACTTAGGAGTCGCTAATCAAGA	14.3272
RPL28_109to118_10snps_1	Randomly_Mutated_Window	CAAACCTTTCATCTGTATCCCGTATATTTAAGATGGCGTTTGCTTTCTCCGTTGATTTTTTTCCTTCTTAGTGATTTTTTTGCATTAAATCCCAGAACAATCATCCAATCTGAATTCT	14.266
RPL3_1to8_10snps_1	Randomly_Mutated_Window	TGCACAGAATAAAATACGATTTATTTAGTTGTCTTTGTCAATCCTCATCTTTCTTTACTCATTATTTCATTTCGGTTTTGTCATCTCTAGAACAACACAGTTACTACAACAATCAATC	11.9214
RPL3_9to18_10snps_1	Randomly_Mutated_Window	CTGGATATGACGCGGTGAATTTATTTAGTTGTCTTTGTCAATCCTCATCTTTCTTTACTCATTATTTCATTTCGGTTTTGTCATCTCTAGAACAACACAGTTACTACAACAATCAATC	9.74015
RPL3_19to28_10snps_1	Randomly_Mutated_Window	CTGGATATATAAAATACGTCGATCCACATTGTCTTTGTCAATCCTCATCTTTCTTTACTCATTATTTCATTTCGGTTTTGTCATCTCTAGAACAACACAGTTACTACAACAATCAATC	20.3556
RPL3_29to38_10snps_1	Randomly_Mutated_Window	CTGGATATATAAAATACGATTTATTTAGGCAATAGCAACAATCCTCATCTTTCTTTACTCATTATTTCATTTCGGTTTTGTCATCTCTAGAACAACACAGTTACTACAACAATCAATC	18.365
RPL3_39to48_10snps_1	Randomly_Mutated_Window	CTGGATATATAAAATACGATTTATTTAGTTGTCTTTGTTCCGATGTTGCTTTCTTTACTCATTATTTCATTTCGGTTTTGTCATCTCTAGAACAACACAGTTACTACAACAATCAATC	18.858
RPL3_49to58_10snps_1	Randomly_Mutated_Window	CTGGATATATAAAATACGATTTATTTAGTTGTCTTTGTCAATCCTCATAGCAAAAGTATCATTATTTCATTTCGGTTTTGTCATCTCTAGAACAACACAGTTACTACAACAATCAATC	17.5641
RPL3_59to68_10snps_1	Randomly_Mutated_Window	CTGGATATATAAAATACGATTTATTTAGTTGTCTTTGTCAATCCTCATCTTTCTTTACGGTAATCGAAATTTCGGTTTTGTCATCTCTAGAACAACACAGTTACTACAACAATCAATC	15.4835
RPL3_69to78_10snps_1	Randomly_Mutated_Window	CTGGATATATAAAATACGATTTATTTAGTTGTCTTTGTCAATCCTCATCTTTCTTTACTCATTATTTCCGCGGAAACCTGTCATCTCTAGAACAACACAGTTACTACAACAATCAATC	18.7359
RPL3_79to88_10snps_1	Randomly_Mutated_Window	CTGGATATATAAAATACGATTTATTTAGTTGTCTTTGTCAATCCTCATCTTTCTTTACTCATTATTTCATTTCGGTTTAAAACAAGGCAGAACAACACAGTTACTACAACAATCAATC	19.9152
RPL3_89to98_10snps_1	Randomly_Mutated_Window	CTGGATATATAAAATACGATTTATTTAGTTGTCTTTGTCAATCCTCATCTTTCTTTACTCATTATTTCATTTCGGTTTTGTCATCTCTTACCTCCGCTAGTTACTACAACAATCAATC	19.3606
RPL3_99to108_10snps_1	Randomly_Mutated_Window	CTGGATATATAAAATACGATTTATTTAGTTGTCTTTGTCAATCCTCATCTTTCTTTACTCATTATTTCATTTCGGTTTTGTCATCTCTAGAACAACACTACCGTCCTTACAATCAATC	20.0518
RPL3_109to118_10snps_1	Randomly_Mutated_Window	CTGGATATATAAAATACGATTTATTTAGTTGTCTTTGTCAATCCTCATCTTTCTTTACTCATTATTTCATTTCGGTTTTGTCATCTCTAGAACAACACAGTTACTACAGGTGGACGGA	17.4439
RPL35B_1to8_10snps_1	Randomly_Mutated_Window	CTTCAAATTGCAATCGTCATCATATGAGAAATGGATATATTGAAAATCTACTCACATCTCTTTTTTGGGGGTTTGGTAGTACAGTGAGAACACGATAAAGAACCAAATAGGACTAAAA	7.58293
RPL35B_9to18_10snps_1	Randomly_Mutated_Window	TAGAGGCCACGCGGGCCGATCATATGAGAAATGGATATATTGAAAATCTACTCACATCTCTTTTTTGGGGGTTTGGTAGTACAGTGAGAACACGATAAAGAACCAAATAGGACTAAAA	5.49548
RPL35B_19to28_10snps_1	Randomly_Mutated_Window	TAGAGGCCTGCAATCGTCGGGTGGATTTAAATGGATATATTGAAAATCTACTCACATCTCTTTTTTGGGGGTTTGGTAGTACAGTGAGAACACGATAAAGAACCAAATAGGACTAAAA	6.14662
RPL35B_29to38_10snps_1	Randomly_Mutated_Window	TAGAGGCCTGCAATCGTCATCATATGAGTCCCATCATAATTGAAAATCTACTCACATCTCTTTTTTGGGGGTTTGGTAGTACAGTGAGAACACGATAAAGAACCAAATAGGACTAAAA	5.93445
RPL35B_39to48_10snps_1	Randomly_Mutated_Window	TAGAGGCCTGCAATCGTCATCATATGAGAAATGGATATCCGATCGCGGTACTCACATCTCTTTTTTGGGGGTTTGGTAGTACAGTGAGAACACGATAAAGAACCAAATAGGACTAAAA	4.90723
RPL35B_49to58_10snps_1	Randomly_Mutated_Window	TAGAGGCCTGCAATCGTCATCATATGAGAAATGGATATATTGAAAATCATTGGTACAGTCTTTTTTGGGGGTTTGGTAGTACAGTGAGAACACGATAAAGAACCAAATAGGACTAAAA	5.51434
RPL35B_59to68_10snps_1	Randomly_Mutated_Window	TAGAGGCCTGCAATCGTCATCATATGAGAAATGGATATATTGAAAATCTACTCACATCAAAGAACACTGGGTTTGGTAGTACAGTGAGAACACGATAAAGAACCAAATAGGACTAAAA	7.07109
RPL35B_69to78_10snps_1	Randomly_Mutated_Window	TAGAGGCCTGCAATCGTCATCATATGAGAAATGGATATATTGAAAATCTACTCACATCTCTTTTTTGGTCACACTACCGTACAGTGAGAACACGATAAAGAACCAAATAGGACTAAAA	7.64212
RPL35B_79to88_10snps_1	Randomly_Mutated_Window	TAGAGGCCTGCAATCGTCATCATATGAGAAATGGATATATTGAAAATCTACTCACATCTCTTTTTTGGGGGTTTGGTAAACGTTGCCTAACACGATAAAGAACCAAATAGGACTAAAA	7.26435
RPL35B_89to98_10snps_1	Randomly_Mutated_Window	TAGAGGCCTGCAATCGTCATCATATGAGAAATGGATATATTGAAAATCTACTCACATCTCTTTTTTGGGGGTTTGGTAGTACAGTGAGGCAGGCTATGAGAACCAAATAGGACTAAAA	NaN
RPL35B_99to108_10snps_1	Randomly_Mutated_Window	TAGAGGCCTGCAATCGTCATCATATGAGAAATGGATATATTGAAAATCTACTCACATCTCTTTTTTGGGGGTTTGGTAGTACAGTGAGAACACGATAAGACCGTTTGGAGGACTAAAA	5.91193
RPL35B_109to118_10snps_1	Randomly_Mutated_Window	TAGAGGCCTGCAATCGTCATCATATGAGAAATGGATATATTGAAAATCTACTCACATCTCTTTTTTGGGGGTTTGGTAGTACAGTGAGAACACGATAAAGAACCAAATTTTCACTGCT	5.56489
RPL43B_1to8_10snps_1	Randomly_Mutated_Window	TCGCAAGCAAATTTGAAATTTCAACTGAGAATCAGAATATATTACTGCCCTTCGTGTTGTAGGGTTATTCATTAACTATATACGATATTATAAACAGCATAGATAATCAAACAAAAAA	7.9094
RPL43B_9to18_10snps_1	Randomly_Mutated_Window	AGCTTGAAGCTAAACGCCTTTCAACTGAGAATCAGAATATATTACTGCCCTTCGTGTTGTAGGGTTATTCATTAACTATATACGATATTATAAACAGCATAGATAATCAAACAAAAAA	7.25058
RPL43B_19to28_10snps_1	Randomly_Mutated_Window	AGCTTGAAAAATTTGAAACCGGCCAATTGAATCAGAATATATTACTGCCCTTCGTGTTGTAGGGTTATTCATTAACTATATACGATATTATAAACAGCATAGATAATCAAACAAAAAA	7.30122
RPL43B_29to38_10snps_1	Randomly_Mutated_Window	AGCTTGAAAAATTTGAAATTTCAACTGAATCAAGAGCAATATTACTGCCCTTCGTGTTGTAGGGTTATTCATTAACTATATACGATATTATAAACAGCATAGATAATCAAACAAAAAA	6.70907
RPL43B_39to48_10snps_1	Randomly_Mutated_Window	AGCTTGAAAAATTTGAAATTTCAACTGAGAATCAGAATTACGCTGCCACCTTCGTGTTGTAGGGTTATTCATTAACTATATACGATATTATAAACAGCATAGATAATCAAACAAAAAA	6.72
RPL43B_49to58_10snps_1	Randomly_Mutated_Window	AGCTTGAAAAATTTGAAATTTCAACTGAGAATCAGAATATATTACTGCGAAGGCAAGCGTAGGGTTATTCATTAACTATATACGATATTATAAACAGCATAGATAATCAAACAAAAAA	NaN
RPL43B_59to68_10snps_1	Randomly_Mutated_Window	AGCTTGAAAAATTTGAAATTTCAACTGAGAATCAGAATATATTACTGCCCTTCGTGTTCGTATACCCGTCATTAACTATATACGATATTATAAACAGCATAGATAATCAAACAAAAAA	8.13801
RPL43B_69to78_10snps_1	Randomly_Mutated_Window	AGCTTGAAAAATTTGAAATTTCAACTGAGAATCAGAATATATTACTGCCCTTCGTGTTGTAGGGTTATCACGCGGTGTTATACGATATTATAAACAGCATAGATAATCAAACAAAAAA	8.40813
RPL43B_79to88_10snps_1	Randomly_Mutated_Window	AGCTTGAAAAATTTGAAATTTCAACTGAGAATCAGAATATATTACTGCCCTTCGTGTTGTAGGGTTATTCATTAACTACGGTAAGGTGTATAAACAGCATAGATAATCAAACAAAAAA	NaN
RPL43B_89to98_10snps_1	Randomly_Mutated_Window	AGCTTGAAAAATTTGAAATTTCAACTGAGAATCAGAATATATTACTGCCCTTCGTGTTGTAGGGTTATTCATTAACTATATACGATATGGGCGCTTCGATAGATAATCAAACAAAAAA	5.16499
RPL43B_99to108_10snps_1	Randomly_Mutated_Window	AGCTTGAAAAATTTGAAATTTCAACTGAGAATCAGAATATATTACTGCCCTTCGTGTTGTAGGGTTATTCATTAACTATATACGATATTATAAACAGCGCCTCCCCGAAAACAAAAAA	7.95057
RPL43B_109to118_10snps_1	Randomly_Mutated_Window	AGCTTGAAAAATTTGAAATTTCAACTGAGAATCAGAATATATTACTGCCCTTCGTGTTGTAGGGTTATTCATTAACTATATACGATATTATAAACAGCATAGATAATCGCTTCCGGCT	7.64503
RPL4A_1to8_10snps_1	Randomly_Mutated_Window	CGTGGTGCAAAATTTATATAAACGAATGGTATCTCCATCACATTTCTTTTAGCCTCGCAACTTGTACTTTTCATCACTTTTCTTGTAATTTAGCAATATCCCAAGAACAATCATCGAA	16.0147
RPL4A_9to18_10snps_1	Randomly_Mutated_Window	AAAAAAAAGTGGGGGTCTTAAACGAATGGTATCTCCATCACATTTCTTTTAGCCTCGCAACTTGTACTTTTCATCACTTTTCTTGTAATTTAGCAATATCCCAAGAACAATCATCGAA	7.1616
RPL4A_19to28_10snps_1	Randomly_Mutated_Window	AAAAAAAAAAAATTTATAGCGTATCTGAGTATCTCCATCACATTTCTTTTAGCCTCGCAACTTGTACTTTTCATCACTTTTCTTGTAATTTAGCAATATCCCAAGAACAATCATCGAA	8.70197
RPL4A_29to38_10snps_1	Randomly_Mutated_Window	AAAAAAAAAAAATTTATATAAACGAATGCCTGAAGGTCCACATTTCTTTTAGCCTCGCAACTTGTACTTTTCATCACTTTTCTTGTAATTTAGCAATATCCCAAGAACAATCATCGAA	19.6825
RPL4A_39to48_10snps_1	Randomly_Mutated_Window	AAAAAAAAAAAATTTATATAAACGAATGGTATCTCCATTTATCGCGAGTTAGCCTCGCAACTTGTACTTTTCATCACTTTTCTTGTAATTTAGCAATATCCCAAGAACAATCATCGAA	18.4608
RPL4A_49to58_10snps_1	Randomly_Mutated_Window	AAAAAAAAAAAATTTATATAAACGAATGGTATCTCCATCACATTTCTTCGGCGTCTCGAACTTGTACTTTTCATCACTTTTCTTGTAATTTAGCAATATCCCAAGAACAATCATCGAA	19.3777
RPL4A_59to68_10snps_1	Randomly_Mutated_Window	AAAAAAAAAAAATTTATATAAACGAATGGTATCTCCATCACATTTCTTTTAGCCTCGCGGTAGCCTAATTTCATCACTTTTCTTGTAATTTAGCAATATCCCAAGAACAATCATCGAA	0.892783
RPL4A_69to78_10snps_1	Randomly_Mutated_Window	AAAAAAAAAAAATTTATATAAACGAATGGTATCTCCATCACATTTCTTTTAGCCTCGCAACTTGTACTGGCTTCATAGTTTCTTGTAATTTAGCAATATCCCAAGAACAATCATCGAA	18.5797
RPL4A_79to88_10snps_1	Randomly_Mutated_Window	AAAAAAAAAAAATTTATATAAACGAATGGTATCTCCATCACATTTCTTTTAGCCTCGCAACTTGTACTTTTCATCACTCAGGAAACTGTTTAGCAATATCCCAAGAACAATCATCGAA	17.6469
RPL4A_89to98_10snps_1	Randomly_Mutated_Window	AAAAAAAAAAAATTTATATAAACGAATGGTATCTCCATCACATTTCTTTTAGCCTCGCAACTTGTACTTTTCATCACTTTTCTTGTAACCGCTGCCATTCCCAAGAACAATCATCGAA	18.3074
RPL4A_99to108_10snps_1	Randomly_Mutated_Window	AAAAAAAAAAAATTTATATAAACGAATGGTATCTCCATCACATTTCTTTTAGCCTCGCAACTTGTACTTTTCATCACTTTTCTTGTAATTTAGCAATACTAGGGATGAAATCATCGAA	NaN
RPL4A_109to118_10snps_1	Randomly_Mutated_Window	AAAAAAAAAAAATTTATATAAACGAATGGTATCTCCATCACATTTCTTTTAGCCTCGCAACTTGTACTTTTCATCACTTTTCTTGTAATTTAGCAATATCCCAAGAACTCAATCAACG	19.2399
RPL5_1to8_10snps_1	Randomly_Mutated_Window	TGTGCACGATAGAAAAGTTTGTAGACATATCCGATGTAGTATATTTCAGAGGCCAACCTTTACTTTTGTTTTCTCCTACACTTCAAAATAAAAGACACCGTCACAAATCTCAGCAACA	8.64527
RPL5_9to18_10snps_1	Randomly_Mutated_Window	AAAAATAATGCACTCCCATTGTAGACATATCCGATGTAGTATATTTCAGAGGCCAACCTTTACTTTTGTTTTCTCCTACACTTCAAAATAAAAGACACCGTCACAAATCTCAGCAACA	8.1974
RPL5_19to28_10snps_1	Randomly_Mutated_Window	AAAAATAAATAGAAAAGTGAAGCACGTAATCCGATGTAGTATATTTCAGAGGCCAACCTTTACTTTTGTTTTCTCCTACACTTCAAAATAAAAGACACCGTCACAAATCTCAGCAACA	9.18935
RPL5_29to38_10snps_1	Randomly_Mutated_Window	AAAAATAAATAGAAAAGTTTGTAGACATGAGTCCGAACGTATATTTCAGAGGCCAACCTTTACTTTTGTTTTCTCCTACACTTCAAAATAAAAGACACCGTCACAAATCTCAGCAACA	9.35908
RPL5_39to48_10snps_1	Randomly_Mutated_Window	AAAAATAAATAGAAAAGTTTGTAGACATATCCGATGTAAGCCTCCATTGAGGCCAACCTTTACTTTTGTTTTCTCCTACACTTCAAAATAAAAGACACCGTCACAAATCTCAGCAACA	6.92238
RPL5_49to58_10snps_1	Randomly_Mutated_Window	AAAAATAAATAGAAAAGTTTGTAGACATATCCGATGTAGTATATTTCACGAAATGTTTTTTACTTTTGTTTTCTCCTACACTTCAAAATAAAAGACACCGTCACAAATCTCAGCAACA	9.72757
RPL5_59to68_10snps_1	Randomly_Mutated_Window	AAAAATAAATAGAAAAGTTTGTAGACATATCCGATGTAGTATATTTCAGAGGCCAACCGAACGAACAATTTTCTCCTACACTTCAAAATAAAAGACACCGTCACAAATCTCAGCAACA	7.41278
RPL5_69to78_10snps_1	Randomly_Mutated_Window	AAAAATAAATAGAAAAGTTTGTAGACATATCCGATGTAGTATATTTCAGAGGCCAACCTTTACTTTTGAAGAGCTGCCCACTTCAAAATAAAAGACACCGTCACAAATCTCAGCAACA	9.08118
RPL5_79to88_10snps_1	Randomly_Mutated_Window	AAAAATAAATAGAAAAGTTTGTAGACATATCCGATGTAGTATATTTCAGAGGCCAACCTTTACTTTTGTTTTCTCCTATTAGATTGTTTAAAAGACACCGTCACAAATCTCAGCAACA	8.96513
RPL5_89to98_10snps_1	Randomly_Mutated_Window	AAAAATAAATAGAAAAGTTTGTAGACATATCCGATGTAGTATATTTCAGAGGCCAACCTTTACTTTTGTTTTCTCCTACACTTCAAAAGCGCGTGTTGCGTCACAAATCTCAGCAACA	NaN
RPL5_99to108_10snps_1	Randomly_Mutated_Window	AAAAATAAATAGAAAAGTTTGTAGACATATCCGATGTAGTATATTTCAGAGGCCAACCTTTACTTTTGTTTTCTCCTACACTTCAAAATAAAAGACACGAGAGGTCCCCTCAGCAACA	NaN
RPL5_109to118_10snps_1	Randomly_Mutated_Window	AAAAATAAATAGAAAAGTTTGTAGACATATCCGATGTAGTATATTTCAGAGGCCAACCTTTACTTTTGTTTTCTCCTACACTTCAAAATAAAAGACACCGTCACAAATAGAGAATTAT	9.60077
RPL8A_1to8_10snps_1	Randomly_Mutated_Window	GCCCGCCTAGACGCTAAATTGTTTATAAAGGCGAGGAATTTGTATCTATCAATTACTATTCCAGTTGTCAGTTTACATTGCTTACCCTCTATTATCACATCAAAACAACTAATTCGAA	NaN
RPL8A_9to18_10snps_1	Randomly_Mutated_Window	AAAAAAAATCGTAAGGTGTTGTTTATAAAGGCGAGGAATTTGTATCTATCAATTACTATTCCAGTTGTCAGTTTACATTGCTTACCCTCTATTATCACATCAAAACAACTAATTCGAA	15.1131
RPL8A_19to28_10snps_1	Randomly_Mutated_Window	AAAAAAAAAGACGCTAAACAAACCCCTCAGGCGAGGAATTTGTATCTATCAATTACTATTCCAGTTGTCAGTTTACATTGCTTACCCTCTATTATCACATCAAAACAACTAATTCGAA	4.93344
RPL8A_29to38_10snps_1	Randomly_Mutated_Window	AAAAAAAAAGACGCTAAATTGTTTATAATCCTCGCATGTTTGTATCTATCAATTACTATTCCAGTTGTCAGTTTACATTGCTTACCCTCTATTATCACATCAAAACAACTAATTCGAA	NaN
RPL8A_39to48_10snps_1	Randomly_Mutated_Window	AAAAAAAAAGACGCTAAATTGTTTATAAAGGCGAGGAAACCAGGCGCTTCAATTACTATTCCAGTTGTCAGTTTACATTGCTTACCCTCTATTATCACATCAAAACAACTAATTCGAA	NaN
RPL8A_49to58_10snps_1	Randomly_Mutated_Window	AAAAAAAAAGACGCTAAATTGTTTATAAAGGCGAGGAATTTGTATCTACGTTACCTCGTTCCAGTTGTCAGTTTACATTGCTTACCCTCTATTATCACATCAAAACAACTAATTCGAA	14.9546
RPL8A_59to68_10snps_1	Randomly_Mutated_Window	AAAAAAAAAGACGCTAAATTGTTTATAAAGGCGAGGAATTTGTATCTATCAATTACTAGAAGTACGTGCAGTTTACATTGCTTACCCTCTATTATCACATCAAAACAACTAATTCGAA	13.3072
RPL8A_69to78_10snps_1	Randomly_Mutated_Window	AAAAAAAAAGACGCTAAATTGTTTATAAAGGCGAGGAATTTGTATCTATCAATTACTATTCCAGTTGTTCTCCCGACGTGCTTACCCTCTATTATCACATCAAAACAACTAATTCGAA	NaN
RPL8A_79to88_10snps_1	Randomly_Mutated_Window	AAAAAAAAAGACGCTAAATTGTTTATAAAGGCGAGGAATTTGTATCTATCAATTACTATTCCAGTTGTCAGTTTACATAAGCACAGTACTATTATCACATCAAAACAACTAATTCGAA	14.8065
RPL8A_89to98_10snps_1	Randomly_Mutated_Window	AAAAAAAAAGACGCTAAATTGTTTATAAAGGCGAGGAATTTGTATCTATCAATTACTATTCCAGTTGTCAGTTTACATTGCTTACCCTGCCGGTGAGAATCAAAACAACTAATTCGAA	11.8919
RPL8A_99to108_10snps_1	Randomly_Mutated_Window	AAAAAAAAAGACGCTAAATTGTTTATAAAGGCGAGGAATTTGTATCTATCAATTACTATTCCAGTTGTCAGTTTACATTGCTTACCCTCTATTATCACGGAGCGGTCGCTAATTCGAA	11.5995
RPL8A_109to118_10snps_1	Randomly_Mutated_Window	AAAAAAAAAGACGCTAAATTGTTTATAAAGGCGAGGAATTTGTATCTATCAATTACTATTCCAGTTGTCAGTTTACATTGCTTACCCTCTATTATCACATCAAAACAAGCTGGGTCGT	14.4053
RPT2_1to8_10snps_1	Randomly_Mutated_Window	CTACAGGATTTACCTAAAAGAAGGTTAATGTGAATATTAGTGAATATGATGCGTATCAGTGTCAAGCTTACAGTCAATTCAAGTTAAAGAAGAGACAGCGTTTTTAATAGAAAATAAA	7.21798
RPT2_9to18_10snps_1	Randomly_Mutated_Window	TCTTTTCTGAACTTAGTGAGAAGGTTAATGTGAATATTAGTGAATATGATGCGTATCAGTGTCAAGCTTACAGTCAATTCAAGTTAAAGAAGAGACAGCGTTTTTAATAGAAAATAAA	7.48447
RPT2_19to28_10snps_1	Randomly_Mutated_Window	TCTTTTCTTTTACCTAAACTCTTTGGTGTGTGAATATTAGTGAATATGATGCGTATCAGTGTCAAGCTTACAGTCAATTCAAGTTAAAGAAGAGACAGCGTTTTTAATAGAAAATAAA	7.93502
RPT2_29to38_10snps_1	Randomly_Mutated_Window	TCTTTTCTTTTACCTAAAAGAAGGTTAAAACCGGGGGCAGTGAATATGATGCGTATCAGTGTCAAGCTTACAGTCAATTCAAGTTAAAGAAGAGACAGCGTTTTTAATAGAAAATAAA	6.80471
RPT2_39to48_10snps_1	Randomly_Mutated_Window	TCTTTTCTTTTACCTAAAAGAAGGTTAATGTGAATATTTTACTTAGAAATGCGTATCAGTGTCAAGCTTACAGTCAATTCAAGTTAAAGAAGAGACAGCGTTTTTAATAGAAAATAAA	8.51937
RPT2_49to58_10snps_1	Randomly_Mutated_Window	TCTTTTCTTTTACCTAAAAGAAGGTTAATGTGAATATTAGTGAATATGCAAAACCCGCGTGTCAAGCTTACAGTCAATTCAAGTTAAAGAAGAGACAGCGTTTTTAATAGAAAATAAA	7.28384
RPT2_59to68_10snps_1	Randomly_Mutated_Window	TCTTTTCTTTTACCTAAAAGAAGGTTAATGTGAATATTAGTGAATATGATGCGTATCATGCAAGGAGATACAGTCAATTCAAGTTAAAGAAGAGACAGCGTTTTTAATAGAAAATAAA	6.89818
RPT2_69to78_10snps_1	Randomly_Mutated_Window	TCTTTTCTTTTACCTAAAAGAAGGTTAATGTGAATATTAGTGAATATGATGCGTATCAGTGTCAAGCTGGTGCCACCATCAAGTTAAAGAAGAGACAGCGTTTTTAATAGAAAATAAA	NaN
RPT2_79to88_10snps_1	Randomly_Mutated_Window	TCTTTTCTTTTACCTAAAAGAAGGTTAATGTGAATATTAGTGAATATGATGCGTATCAGTGTCAAGCTTACAGTCAATATGGTGCCCTGAAGAGACAGCGTTTTTAATAGAAAATAAA	3.57853
RPT2_89to98_10snps_1	Randomly_Mutated_Window	TCTTTTCTTTTACCTAAAAGAAGGTTAATGTGAATATTAGTGAATATGATGCGTATCAGTGTCAAGCTTACAGTCAATTCAAGTTAAACCCATACGCACGTTTTTAATAGAAAATAAA	7.44822
RPT2_99to108_10snps_1	Randomly_Mutated_Window	TCTTTTCTTTTACCTAAAAGAAGGTTAATGTGAATATTAGTGAATATGATGCGTATCAGTGTCAAGCTTACAGTCAATTCAAGTTAAAGAAGAGACAGGCGGACACTGAGAAAATAAA	6.72672
RPT2_109to118_10snps_1	Randomly_Mutated_Window	TCTTTTCTTTTACCTAAAAGAAGGTTAATGTGAATATTAGTGAATATGATGCGTATCAGTGTCAAGCTTACAGTCAATTCAAGTTAAAGAAGAGACAGCGTTTTTAATCCCCGTGTCG	7.44393
TIF11_1to8_10snps_1	Randomly_Mutated_Window	GGTAGGCGAATAGTGAAAAATTGAAAAAAGCTTCAATTTTAGTTTGCTGAAAGAAACCTTTACTTATGTAGAAGGTGTACTTGCAAAAGCACTAGTGTAATATAGAGCAAAGTTCATC	7.13659
TIF11_9to18_10snps_1	Randomly_Mutated_Window	CAAGAAGTCCGCCCTGCGAATTGAAAAAAGCTTCAATTTTAGTTTGCTGAAAGAAACCTTTACTTATGTAGAAGGTGTACTTGCAAAAGCACTAGTGTAATATAGAGCAAAGTTCATC	6.9
TIF11_19to28_10snps_1	Randomly_Mutated_Window	CAAGAAGTAATAGTGAAACCACTCTCGCAGCTTCAATTTTAGTTTGCTGAAAGAAACCTTTACTTATGTAGAAGGTGTACTTGCAAAAGCACTAGTGTAATATAGAGCAAAGTTCATC	6.13915
TIF11_29to38_10snps_1	Randomly_Mutated_Window	CAAGAAGTAATAGTGAAAAATTGAAAAATTGCCGCGGATTAGTTTGCTGAAAGAAACCTTTACTTATGTAGAAGGTGTACTTGCAAAAGCACTAGTGTAATATAGAGCAAAGTTCATC	5.07621
TIF11_39to48_10snps_1	Randomly_Mutated_Window	CAAGAAGTAATAGTGAAAAATTGAAAAAAGCTTCAATTCGGACGGATCGAAAGAAACCTTTACTTATGTAGAAGGTGTACTTGCAAAAGCACTAGTGTAATATAGAGCAAAGTTCATC	5.59336
TIF11_49to58_10snps_1	Randomly_Mutated_Window	CAAGAAGTAATAGTGAAAAATTGAAAAAAGCTTCAATTTTAGTTTGCTTCGTTCTTTATTTACTTATGTAGAAGGTGTACTTGCAAAAGCACTAGTGTAATATAGAGCAAAGTTCATC	7.98483
TIF11_59to68_10snps_1	Randomly_Mutated_Window	CAAGAAGTAATAGTGAAAAATTGAAAAAAGCTTCAATTTTAGTTTGCTGAAAGAAACCAGACAGGCGATAGAAGGTGTACTTGCAAAAGCACTAGTGTAATATAGAGCAAAGTTCATC	7.34976
TIF11_69to78_10snps_1	Randomly_Mutated_Window	CAAGAAGTAATAGTGAAAAATTGAAAAAAGCTTCAATTTTAGTTTGCTGAAAGAAACCTTTACTTATGCTTCCATCTCACTTGCAAAAGCACTAGTGTAATATAGAGCAAAGTTCATC	7.65449
TIF11_79to88_10snps_1	Randomly_Mutated_Window	CAAGAAGTAATAGTGAAAAATTGAAAAAAGCTTCAATTTTAGTTTGCTGAAAGAAACCTTTACTTATGTAGAAGGTGTGACACATGTCGCACTAGTGTAATATAGAGCAAAGTTCATC	4.2022
TIF11_89to98_10snps_1	Randomly_Mutated_Window	CAAGAAGTAATAGTGAAAAATTGAAAAAAGCTTCAATTTTAGTTTGCTGAAAGAAACCTTTACTTATGTAGAAGGTGTACTTGCAAAAAAGTCCTAACAATATAGAGCAAAGTTCATC	7.20416
TIF11_99to108_10snps_1	Randomly_Mutated_Window	CAAGAAGTAATAGTGAAAAATTGAAAAAAGCTTCAATTTTAGTTTGCTGAAAGAAACCTTTACTTATGTAGAAGGTGTACTTGCAAAAGCACTAGTGTGGACGTCGAGAAAGTTCATC	5.5833
TIF11_109to118_10snps_1	Randomly_Mutated_Window	CAAGAAGTAATAGTGAAAAATTGAAAAAAGCTTCAATTTTAGTTTGCTGAAAGAAACCTTTACTTATGTAGAAGGTGTACTTGCAAAAGCACTAGTGTAATATAGAGCCCCCGGGGCT	1.52702
VMA13_1to8_10snps_1	Randomly_Mutated_Window	TTGTCGGGGATAATGAAAAAAAAAAAAAGTATTGTATATGACTGTTTTCCTGATAAAAGAATGCCTGCAATAATTCAAAGACAAGAGATATAAAAGTGCACTGGCGATTTCAGGAACA	6.48991
VMA13_9to18_10snps_1	Randomly_Mutated_Window	AAAGGTTTAGGGTGAGTTAAAAAAAAAAGTATTGTATATGACTGTTTTCCTGATAAAAGAATGCCTGCAATAATTCAAAGACAAGAGATATAAAAGTGCACTGGCGATTTCAGGAACA	6.06769
VMA13_19to28_10snps_1	Randomly_Mutated_Window	AAAGGTTTGATAATGAAATCGCTTCTTCGTATTGTATATGACTGTTTTCCTGATAAAAGAATGCCTGCAATAATTCAAAGACAAGAGATATAAAAGTGCACTGGCGATTTCAGGAACA	7.39444
VMA13_29to38_10snps_1	Randomly_Mutated_Window	AAAGGTTTGATAATGAAAAAAAAAAAAAACCCGAATAGTGACTGTTTTCCTGATAAAAGAATGCCTGCAATAATTCAAAGACAAGAGATATAAAAGTGCACTGGCGATTTCAGGAACA	5.79361
VMA13_39to48_10snps_1	Randomly_Mutated_Window	AAAGGTTTGATAATGAAAAAAAAAAAAAGTATTGTATAATTAGCGGACCCTGATAAAAGAATGCCTGCAATAATTCAAAGACAAGAGATATAAAAGTGCACTGGCGATTTCAGGAACA	6.44727
VMA13_49to58_10snps_1	Randomly_Mutated_Window	AAAGGTTTGATAATGAAAAAAAAAAAAAGTATTGTATATGACTGTTTTTTGAGCTCCGGAATGCCTGCAATAATTCAAAGACAAGAGATATAAAAGTGCACTGGCGATTTCAGGAACA	NaN
VMA13_59to68_10snps_1	Randomly_Mutated_Window	AAAGGTTTGATAATGAAAAAAAAAAAAAGTATTGTATATGACTGTTTTCCTGATAAAACCGACAGGCAAATAATTCAAAGACAAGAGATATAAAAGTGCACTGGCGATTTCAGGAACA	6.21276
VMA13_69to78_10snps_1	Randomly_Mutated_Window	AAAGGTTTGATAATGAAAAAAAAAAAAAGTATTGTATATGACTGTTTTCCTGATAAAAGAATGCCTGCTCCTTCAGGCAGACAAGAGATATAAAAGTGCACTGGCGATTTCAGGAACA	5.00566
VMA13_79to88_10snps_1	Randomly_Mutated_Window	AAAGGTTTGATAATGAAAAAAAAAAAAAGTATTGTATATGACTGTTTTCCTGATAAAAGAATGCCTGCAATAATTCAACTCGCCATCCTATAAAAGTGCACTGGCGATTTCAGGAACA	5.70277
VMA13_89to98_10snps_1	Randomly_Mutated_Window	AAAGGTTTGATAATGAAAAAAAAAAAAAGTATTGTATATGACTGTTTTCCTGATAAAAGAATGCCTGCAATAATTCAAAGACAAGAGAATCCTCGCACCACTGGCGATTTCAGGAACA	NaN
VMA13_99to108_10snps_1	Randomly_Mutated_Window	AAAGGTTTGATAATGAAAAAAAAAAAAAGTATTGTATATGACTGTTTTCCTGATAAAAGAATGCCTGCAATAATTCAAAGACAAGAGATATAAAAGTGTTTCCAAAGCTTCAGGAACA	7.36473
VMA13_109to118_10snps_1	Randomly_Mutated_Window	AAAGGTTTGATAATGAAAAAAAAAAAAAGTATTGTATATGACTGTTTTCCTGATAAAAGAATGCCTGCAATAATTCAAAGACAAGAGATATAAAAGTGCACTGGCGATCGTCAACGGT	6.85446
snR14_1to8_10snps_1	Randomly_Mutated_Window	CCGCCCGCGGAACAGAATATTAGTTAGCTTCATTGTCCAATTACTATTGTTACTTACGTTTAATGCATTTTCTTTTCTTTCACTTCCTTCCTTAATACTCCATCCTTATGCACGGGAA	NaN
snR14_9to18_10snps_1	Randomly_Mutated_Window	ATATAAAACCTGGGATTCATTAGTTAGCTTCATTGTCCAATTACTATTGTTACTTACGTTTAATGCATTTTCTTTTCTTTCACTTCCTTCCTTAATACTCCATCCTTATGCACGGGAA	NaN
snR14_19to28_10snps_1	Randomly_Mutated_Window	ATATAAAAGGAACAGAATGCGGAACTCATTCATTGTCCAATTACTATTGTTACTTACGTTTAATGCATTTTCTTTTCTTTCACTTCCTTCCTTAATACTCCATCCTTATGCACGGGAA	NaN
snR14_29to38_10snps_1	Randomly_Mutated_Window	ATATAAAAGGAACAGAATATTAGTTAGCCGTTCATCAGAATTACTATTGTTACTTACGTTTAATGCATTTTCTTTTCTTTCACTTCCTTCCTTAATACTCCATCCTTATGCACGGGAA	NaN
snR14_39to48_10snps_1	Randomly_Mutated_Window	ATATAAAAGGAACAGAATATTAGTTAGCTTCATTGTCCCCGCTTGGAGGTTACTTACGTTTAATGCATTTTCTTTTCTTTCACTTCCTTCCTTAATACTCCATCCTTATGCACGGGAA	NaN
snR14_49to58_10snps_1	Randomly_Mutated_Window	ATATAAAAGGAACAGAATATTAGTTAGCTTCATTGTCCAATTACTATTCGCGGAAGTTTTTAATGCATTTTCTTTTCTTTCACTTCCTTCCTTAATACTCCATCCTTATGCACGGGAA	NaN
snR14_59to68_10snps_1	Randomly_Mutated_Window	ATATAAAAGGAACAGAATATTAGTTAGCTTCATTGTCCAATTACTATTGTTACTTACGAGCTCCCAGCTTTCTTTTCTTTCACTTCCTTCCTTAATACTCCATCCTTATGCACGGGAA	NaN
snR14_69to78_10snps_1	Randomly_Mutated_Window	ATATAAAAGGAACAGAATATTAGTTAGCTTCATTGTCCAATTACTATTGTTACTTACGTTTAATGCATACCTGGCAAATTCACTTCCTTCCTTAATACTCCATCCTTATGCACGGGAA	NaN
snR14_79to88_10snps_1	Randomly_Mutated_Window	ATATAAAAGGAACAGAATATTAGTTAGCTTCATTGTCCAATTACTATTGTTACTTACGTTTAATGCATTTTCTTTTCTCCTCTCCAACTCCTTAATACTCCATCCTTATGCACGGGAA	NaN
snR14_89to98_10snps_1	Randomly_Mutated_Window	ATATAAAAGGAACAGAATATTAGTTAGCTTCATTGTCCAATTACTATTGTTACTTACGTTTAATGCATTTTCTTTTCTTTCACTTCCTCTTACTTATGTCCATCCTTATGCACGGGAA	NaN
snR14_99to108_10snps_1	Randomly_Mutated_Window	ATATAAAAGGAACAGAATATTAGTTAGCTTCATTGTCCAATTACTATTGTTACTTACGTTTAATGCATTTTCTTTTCTTTCACTTCCTTCCTTAATACCGTCATTGATTGCACGGGAA	18.4853
snR14_109to118_10snps_1	Randomly_Mutated_Window	ATATAAAAGGAACAGAATATTAGTTAGCTTCATTGTCCAATTACTATTGTTACTTACGTTTAATGCATTTTCTTTTCTTTCACTTCCTTCCTTAATACTCCATCCTTAACTGGACACC	17.2895
snR14_1to28_30snps_1	Randomly_Mutated_Window	CATCTTCGTTGCAGTCCACCCCACCGCTTTCATTGTCCAATTACTATTGTTACTTACGTTTAATGCATTTTCTTTTCTTTCACTTCCTTCCTTAATACTCCATCCTTATGCACGGGAA	NaN
snR14_1to28_30snps_2	Randomly_Mutated_Window	TGTCCTGTCTTTACTTGGGACTTACTTATTCATTGTCCAATTACTATTGTTACTTACGTTTAATGCATTTTCTTTTCTTTCACTTCCTTCCTTAATACTCCATCCTTATGCACGGGAA	NaN
snR14_29to58_30snps_1	Randomly_Mutated_Window	ATATAAAAGGAACAGAATATTAGTTAGCCATGCATCAGCGGAGAACAAAACTTAGCGCTTTAATGCATTTTCTTTTCTTTCACTTCCTTCCTTAATACTCCATCCTTATGCACGGGAA	NaN
snR14_29to58_30snps_2	Randomly_Mutated_Window	ATATAAAAGGAACAGAATATTAGTTAGCAAGGACAGGTCGCGGTATACAACCACATGATTTAATGCATTTTCTTTTCTTTCACTTCCTTCCTTAATACTCCATCCTTATGCACGGGAA	NaN
snR14_59to88_30snps_1	Randomly_Mutated_Window	ATATAAAAGGAACAGAATATTAGTTAGCTTCATTGTCCAATTACTATTGTTACTTACGAACCTGCATGACGGCAAAGAGAGTAACATATCCTTAATACTCCATCCTTATGCACGGGAA	NaN
snR14_59to88_30snps_2	Randomly_Mutated_Window	ATATAAAAGGAACAGAATATTAGTTAGCTTCATTGTCCAATTACTATTGTTACTTACGCCACTATTTCAACGCCGATACAAGAAGAGGTCCTTAATACTCCATCCTTATGCACGGGAA	NaN
snR14_89to118_30snps_1	Randomly_Mutated_Window	ATATAAAAGGAACAGAATATTAGTTAGCTTCATTGTCCAATTACTATTGTTACTTACGTTTAATGCATTTTCTTTTCTTTCACTTCCTATGACGTACTCTTCATGACTGTGGTTCAGC	NaN
snR14_89to118_30snps_2	Randomly_Mutated_Window	ATATAAAAGGAACAGAATATTAGTTAGCTTCATTGTCCAATTACTATTGTTACTTACGTTTAATGCATTTTCTTTTCTTTCACTTCCTGATACGTCTTCTAGCGGCCGAATGGATTCT	NaN
TDH3_1to28_30snps_1	Randomly_Mutated_Window	CCAGCTACTATATTGCACCCGGTCGTCTCTTCTTAAATTCTACTTTTATAGTTAGTCTTTTTTTTAGTTTTAAAACACCAAGAACTTAGTTTCGAATAAACACACATAAACAAACAAA	NaN
TDH3_1to28_30snps_2	Randomly_Mutated_Window	AATCTGAGAACCTCCGGCCCACAGGCCCCTTCTTAAATTCTACTTTTATAGTTAGTCTTTTTTTTAGTTTTAAAACACCAAGAACTTAGTTTCGAATAAACACACATAAACAAACAAA	7.71112
TDH3_29to58_30snps_1	Randomly_Mutated_Window	TTGTAATTCTGTAAATCTATTTCTTAAATACTAGTCCACACCGAGCGTGTCCACAAGGTTTTTTTAGTTTTAAAACACCAAGAACTTAGTTTCGAATAAACACACATAAACAAACAAA	8.06636
TDH3_29to58_30snps_2	Randomly_Mutated_Window	TTGTAATTCTGTAAATCTATTTCTTAAAGGCACCCGTGCAACGCACCTGTCAAGAGGATTTTTTTAGTTTTAAAACACCAAGAACTTAGTTTCGAATAAACACACATAAACAAACAAA	5.7363
TDH3_59to88_30snps_1	Randomly_Mutated_Window	TTGTAATTCTGTAAATCTATTTCTTAAACTTCTTAAATTCTACTTTTATAGTTAGTCTCCCCGGGTACCCGCGTCTTGGGTCGGTCGGGTTTCGAATAAACACACATAAACAAACAAA	3.95659
TDH3_59to88_30snps_2	Randomly_Mutated_Window	TTGTAATTCTGTAAATCTATTTCTTAAACTTCTTAAATTCTACTTTTATAGTTAGTCTCAAGAACTCACAGTCGGATGTGTTTTTGGGGTTTCGAATAAACACACATAAACAAACAAA	9.31461
TDH3_89to118_30snps_1	Randomly_Mutated_Window	TTGTAATTCTGTAAATCTATTTCTTAAACTTCTTAAATTCTACTTTTATAGTTAGTCTTTTTTTTAGTTTTAAAACACCAAGAACTTAAAAGTACGACTCTCTCACATGCATTCGGTG	NaN
TDH3_89to118_30snps_2	Randomly_Mutated_Window	TTGTAATTCTGTAAATCTATTTCTTAAACTTCTTAAATTCTACTTTTATAGTTAGTCTTTTTTTTAGTTTTAAAACACCAAGAACTTACGACGATTGTTCTTTGTCCCCTTCTTGGCG	5.30939
GAL7_1to28_30snps_1	Randomly_Mutated_Window	CTATCCCAACACAAATTACATAACGAGGAAGATATAAAAGCAGGTCGGAAATATTTATGGGCATTATTATGCAGAGCATCAACATGATAAAAAAAAACAGTTGAATATTCCCTCAAAA	10.372
GAL7_1to28_30snps_2	Randomly_Mutated_Window	CCAAACACAGGTCCGTCCACTTGGTCTGAAGATATAAAAGCAGGTCGGAAATATTTATGGGCATTATTATGCAGAGCATCAACATGATAAAAAAAAACAGTTGAATATTCCCTCAAAA	13.7628
GAL7_29to58_30snps_1	Randomly_Mutated_Window	TAGCTATGTTCAGTTAGTTTGGCTAGCAGCATGCCTTCCAGGCTGTTTTTCAGGCATCGGGCATTATTATGCAGAGCATCAACATGATAAAAAAAAACAGTTGAATATTCCCTCAAAA	NaN
GAL7_29to58_30snps_2	Randomly_Mutated_Window	TAGCTATGTTCAGTTAGTTTGGCTAGCAGTCGGCACCTTAGCTCATTTCTGCGAAACCGGGCATTATTATGCAGAGCATCAACATGATAAAAAAAAACAGTTGAATATTCCCTCAAAA	2.37934
GAL7_59to88_30snps_1	Randomly_Mutated_Window	TAGCTATGTTCAGTTAGTTTGGCTAGCAAAGATATAAAAGCAGGTCGGAAATATTTATATTGCCCTGGCATATTTTGGCATGGTACCGAAAAAAAAACAGTTGAATATTCCCTCAAAA	13.6107
GAL7_59to88_30snps_2	Randomly_Mutated_Window	TAGCTATGTTCAGTTAGTTTGGCTAGCAAAGATATAAAAGCAGGTCGGAAATATTTATAAAGCCAGAACCTTCACTTTCACGGTAATAAAAAAAAAACAGTTGAATATTCCCTCAAAA	17.2119
GAL7_89to118_30snps_1	Randomly_Mutated_Window	TAGCTATGTTCAGTTAGTTTGGCTAGCAAAGATATAAAAGCAGGTCGGAAATATTTATGGGCATTATTATGCAGAGCATCAACATGATCTTTCGCGGTTTCATGTCCAGAATCACCCG	NaN
GAL7_89to118_30snps_2	Randomly_Mutated_Window	TAGCTATGTTCAGTTAGTTTGGCTAGCAAAGATATAAAAGCAGGTCGGAAATATTTATGGGCATTATTATGCAGAGCATCAACATGATTCTGCTCTCTCTGGCCGACAGTATCTTTCC	5.16699
CCW12_1to28_30snps_1	Randomly_Mutated_Window	GAATGATGGGTGGCGAGCAGGTGCATGGCATTGTTCTAATTATTCTTATTCTCCTTTATTCTTTCCTAACATACCAAGAAATTAATCTTCTGTCATTCGCTTAAACACTATATCAATA	4.37838
CCW12_1to28_30snps_2	Randomly_Mutated_Window	GCCAGACTCGTCTGCGTCAAATTGGTGCCATTGTTCTAATTATTCTTATTCTCCTTTATTCTTTCCTAACATACCAAGAAATTAATCTTCTGTCATTCGCTTAAACACTATATCAATA	4.83449
CCW12_29to58_30snps_1	Randomly_Mutated_Window	ATGCTTGATAATCTTTCTTTCCATCCTAACGACGCGGCCAACCGTAGTGCACGGGAATTTCTTTCCTAACATACCAAGAAATTAATCTTCTGTCATTCGCTTAAACACTATATCAATA	NaN
CCW12_29to58_30snps_2	Randomly_Mutated_Window	ATGCTTGATAATCTTTCTTTCCATCCTAGTACAGCGCGGGGGAATCACCAACGAACACTTCTTTCCTAACATACCAAGAAATTAATCTTCTGTCATTCGCTTAAACACTATATCAATA	2.83658
CCW12_59to88_30snps_1	Randomly_Mutated_Window	ATGCTTGATAATCTTTCTTTCCATCCTACATTGTTCTAATTATTCTTATTCTCCTTTACCGGCATGACGTCGGGTCTTGGGAACCATATCTGTCATTCGCTTAAACACTATATCAATA	5.25668
CCW12_59to88_30snps_2	Randomly_Mutated_Window	ATGCTTGATAATCTTTCTTTCCATCCTACATTGTTCTAATTATTCTTATTCTCCTTTAAGTGCAGAATCTTAGTTTGCGCGAGGTGGCTCTGTCATTCGCTTAAACACTATATCAATA	NaN
CCW12_89to118_30snps_1	Randomly_Mutated_Window	ATGCTTGATAATCTTTCTTTCCATCCTACATTGTTCTAATTATTCTTATTCTCCTTTATTCTTTCCTAACATACCAAGAAATTAATCTCTCCGACCGGTTGGCGTGCGCTCCAGCTGT	5.79603
CCW12_89to118_30snps_2	Randomly_Mutated_Window	ATGCTTGATAATCTTTCTTTCCATCCTACATTGTTCTAATTATTCTTATTCTCCTTTATTCTTTCCTAACATACCAAGAAATTAATCTCACACGCCCTTAGATTCAGTCGCGAGCGGG	6.68322
ENO2_1to28_30snps_1	Randomly_Mutated_Window	TGAGTAATAGTGACCCGCGGACACAGCACCTTGTCTCAATCTTTTATTTTTATTTTATTTTTCTTTTCTTAGTTTCTTTCATAACACCAAGCAACTAATACTATAACATACAATAATA	7.43194
ENO2_1to28_30snps_2	Randomly_Mutated_Window	CCGGCGGTCCTCAGGTAGAAGCGCGCCACCTTGTCTCAATCTTTTATTTTTATTTTATTTTTCTTTTCTTAGTTTCTTTCATAACACCAAGCAACTAATACTATAACATACAATAATA	7.50423
ENO2_29to58_30snps_1	Randomly_Mutated_Window	ATTAATTCTTATTTTGTATCTTTTCTTCTTGGCGTGTGTGTCGAACGACAGCAGCCCCTTTTCTTTTCTTAGTTTCTTTCATAACACCAAGCAACTAATACTATAACATACAATAATA	6.464
ENO2_29to58_30snps_2	Randomly_Mutated_Window	ATTAATTCTTATTTTGTATCTTTTCTTCGAGACAGCTTTCGGGCACGAAACCGGCGTGTTTTCTTTTCTTAGTTTCTTTCATAACACCAAGCAACTAATACTATAACATACAATAATA	6.51034
ENO2_59to88_30snps_1	Randomly_Mutated_Window	ATTAATTCTTATTTTGTATCTTTTCTTCCCTTGTCTCAATCTTTTATTTTTATTTTATAAACTGGGATCACAGAAAACGGCATCGTGGAAGCAACTAATACTATAACATACAATAATA	NaN
ENO2_59to88_30snps_2	Randomly_Mutated_Window	ATTAATTCTTATTTTGTATCTTTTCTTCCCTTGTCTCAATCTTTTATTTTTATTTTATGGAGAAACCGCATAGCAGAGAATGGTTTGGAAGCAACTAATACTATAACATACAATAATA	7.06041
ENO2_89to118_30snps_1	Randomly_Mutated_Window	ATTAATTCTTATTTTGTATCTTTTCTTCCCTTGTCTCAATCTTTTATTTTTATTTTATTTTTCTTTTCTTAGTTTCTTTCATAACACCTGCTCTGGGTGTTCTGCGTGACACTATTCC	4.73153
ENO2_89to118_30snps_2	Randomly_Mutated_Window	ATTAATTCTTATTTTGTATCTTTTCTTCCCTTGTCTCAATCTTTTATTTTTATTTTATTTTTCTTTTCTTAGTTTCTTTCATAACACCCGAGTGGGTTCGTGGAGTATATGGCGTCCC	NaN
PDC1_1to28_30snps_1	Randomly_Mutated_Window	TGCCCTTGCATTGGGATATACGCGATATTTTATTTTCATATTTCTTGTCATATTCCTTTCTCAATTATTATTTTCTACTCATAACCTCACGCAAAATAACACAGTCAAATCAATCAAA	9.73419
PDC1_1to28_30snps_2	Randomly_Mutated_Window	ATAATGCCCGTACCGATCAACCTGCAGTTTTATTTTCATATTTCTTGTCATATTCCTTTCTCAATTATTATTTTCTACTCATAACCTCACGCAAAATAACACAGTCAAATCAATCAAA	9.76192
PDC1_29to58_30snps_1	Randomly_Mutated_Window	CCTTGCAATCAGATTTGGGTTTGTTCCCGAGCCGGCACCGAAAGCATCTCACGATGGCTCTCAATTATTATTTTCTACTCATAACCTCACGCAAAATAACACAGTCAAATCAATCAAA	NaN
PDC1_29to58_30snps_2	Randomly_Mutated_Window	CCTTGCAATCAGATTTGGGTTTGTTCCCCACTCAGGATGCGCAAGCTAGGGCGAAGACTCTCAATTATTATTTTCTACTCATAACCTCACGCAAAATAACACAGTCAAATCAATCAAA	3.88364
PDC1_59to88_30snps_1	Randomly_Mutated_Window	CCTTGCAATCAGATTTGGGTTTGTTCCCTTTATTTTCATATTTCTTGTCATATTCCTTCACGTCAGGCCTACGAGGGTGTTCGCAGCAACGCAAAATAACACAGTCAAATCAATCAAA	7.81501
PDC1_59to88_30snps_2	Randomly_Mutated_Window	CCTTGCAATCAGATTTGGGTTTGTTCCCTTTATTTTCATATTTCTTGTCATATTCCTTGGAGTCCGCGGTCAAAGGGGATGGTTGACGACGCAAAATAACACAGTCAAATCAATCAAA	4.5199
PDC1_89to118_30snps_1	Randomly_Mutated_Window	CCTTGCAATCAGATTTGGGTTTGTTCCCTTTATTTTCATATTTCTTGTCATATTCCTTTCTCAATTATTATTTTCTACTCATAACCTCCTAACTGTGGTAGTGTGAGTGATTCCATCG	7.90547
PDC1_89to118_30snps_2	Randomly_Mutated_Window	CCTTGCAATCAGATTTGGGTTTGTTCCCTTTATTTTCATATTTCTTGTCATATTCCTTTCTCAATTATTATTTTCTACTCATAACCTCGGCTGTGCCCCGGTCCAACGTAGGCCAGGT	2.66381
FBA1_1to28_30snps_1	Randomly_Mutated_Window	CGTACATGTCTATATCGTTCGGGGGGAGAATTTCAGTTATTGTTCTTCCTTGCGTTATTCTTCTGTTCTTCTTTTTCTTTTGTCATATATAACCATAACCAAGTAATACATATTCAAA	5.37578
FBA1_1to28_30snps_2	Randomly_Mutated_Window	TCGCGACGCACGCCCCCCTCATAGATATAATTTCAGTTATTGTTCTTCCTTGCGTTATTCTTCTGTTCTTCTTTTTCTTTTGTCATATATAACCATAACCAAGTAATACATATTCAAA	NaN
FBA1_29to58_30snps_1	Randomly_Mutated_Window	AAAGACAAAGACATAATACTTCTCTATCGTGGATCCCAGGAAAGTCAATCAATTACCATCTTCTGTTCTTCTTTTTCTTTTGTCATATATAACCATAACCAAGTAATACATATTCAAA	NaN
FBA1_29to58_30snps_2	Randomly_Mutated_Window	AAAGACAAAGACATAATACTTCTCTATCTTGAGGTCCCCGCAGGGGAATGGATCCGCGTCTTCTGTTCTTCTTTTTCTTTTGTCATATATAACCATAACCAAGTAATACATATTCAAA	3.47963
FBA1_59to88_30snps_1	Randomly_Mutated_Window	AAAGACAAAGACATAATACTTCTCTATCAATTTCAGTTATTGTTCTTCCTTGCGTTATCTCGTCTACGACGGCGCGGACAGACAGGCCATAACCATAACCAAGTAATACATATTCAAA	4.73909
FBA1_59to88_30snps_2	Randomly_Mutated_Window	AAAGACAAAGACATAATACTTCTCTATCAATTTCAGTTATTGTTCTTCCTTGCGTTATGTAAAGTCGTGCTAGAAGTCGGAAAGTGCCATAACCATAACCAAGTAATACATATTCAAA	8.21126
FBA1_89to118_30snps_1	Randomly_Mutated_Window	AAAGACAAAGACATAATACTTCTCTATCAATTTCAGTTATTGTTCTTCCTTGCGTTATTCTTCTGTTCTTCTTTTTCTTTTGTCATATCCGTTTTGTGAACGCACTCCTCCTGAAGCC	5.68714
FBA1_89to118_30snps_2	Randomly_Mutated_Window	AAAGACAAAGACATAATACTTCTCTATCAATTTCAGTTATTGTTCTTCCTTGCGTTATTCTTCTGTTCTTCTTTTTCTTTTGTCATATCCCTAATATCATTCACTTACACCTAGGGCG	6.7412
TEF1_1to28_30snps_1	Randomly_Mutated_Window	CCGGTCTGGAGATCCCGTCTGTTGGGAGGTTTCATTTTTCTTGTTCTATTACAACTTTTTTTACTTCTTGCTCATTAGAAAGAAAGCATAGCAATCTAATCTAAGTTTTAATTACAAA	6.28448
TEF1_1to28_30snps_2	Randomly_Mutated_Window	CGGGGTTGAGGACCAAAGCTTCCGGAGCGTTTCATTTTTCTTGTTCTATTACAACTTTTTTTACTTCTTGCTCATTAGAAAGAAAGCATAGCAATCTAATCTAAGTTTTAATTACAAA	7.17011
TEF1_29to58_30snps_1	Randomly_Mutated_Window	TAAACGGTCTTCAATTTCTCAAGTTTCAACGGATGAGCGAACTACAGTGCCTTGTAGATTTTACTTCTTGCTCATTAGAAAGAAAGCATAGCAATCTAATCTAAGTTTTAATTACAAA	3.80412
TEF1_29to58_30snps_2	Randomly_Mutated_Window	TAAACGGTCTTCAATTTCTCAAGTTTCATGCCAGGGCGAGACAGAGGCCGTGTGAGGCTTTTACTTCTTGCTCATTAGAAAGAAAGCATAGCAATCTAATCTAAGTTTTAATTACAAA	2.87183
TEF1_59to88_30snps_1	Randomly_Mutated_Window	TAAACGGTCTTCAATTTCTCAAGTTTCAGTTTCATTTTTCTTGTTCTATTACAACTTTACCGCACGGGGAAATCGGGTGCCTTTGATGTAGCAATCTAATCTAAGTTTTAATTACAAA	1.70333
TEF1_59to88_30snps_2	Randomly_Mutated_Window	TAAACGGTCTTCAATTTCTCAAGTTTCAGTTTCATTTTTCTTGTTCTATTACAACTTTAAGCCAGCTGACTATGAACCTGTCCCCCGCTAGCAATCTAATCTAAGTTTTAATTACAAA	NaN
TEF1_89to118_30snps_1	Randomly_Mutated_Window	TAAACGGTCTTCAATTTCTCAAGTTTCAGTTTCATTTTTCTTGTTCTATTACAACTTTTTTTACTTCTTGCTCATTAGAAAGAAAGCAATCGCTCTCGCCTCTTCCCGCCGACGAGGG	4.47408
TEF1_89to118_30snps_2	Randomly_Mutated_Window	TAAACGGTCTTCAATTTCTCAAGTTTCAGTTTCATTTTTCTTGTTCTATTACAACTTTTTTTACTTCTTGCTCATTAGAAAGAAAGCAGGTGGGCTATGGGGCGCCAAGTGCCCTCTT	NaN
ADH1_1to28_30snps_1	Randomly_Mutated_Window	AGGCGCGAGTGATGAGGAGGAACAAAGAGTCATTGTTCTCGTTCCCTTTCTTCCTTGTTTCTTTTTCTGCACAATATTTCAAGCTATACCAAGCATACAATCAACTATCTCATATACA	5.82216
ADH1_1to28_30snps_2	Randomly_Mutated_Window	AAACTCGCATGACTCGGCAACAGGTTGAGTCATTGTTCTCGTTCCCTTTCTTCCTTGTTTCTTTTTCTGCACAATATTTCAAGCTATACCAAGCATACAATCAACTATCTCATATACA	4.13318
ADH1_29to58_30snps_1	Randomly_Mutated_Window	CCTGCAATTATTAATCTTTTGTTTCCTCCAATAAAACGGTTAGGGAGACGGGTAAGAATTCTTTTTCTGCACAATATTTCAAGCTATACCAAGCATACAATCAACTATCTCATATACA	6.89985
ADH1_29to58_30snps_2	Randomly_Mutated_Window	CCTGCAATTATTAATCTTTTGTTTCCTCAGTGCGCCGTAAAGATGTCAAGGATGCGCGTTCTTTTTCTGCACAATATTTCAAGCTATACCAAGCATACAATCAACTATCTCATATACA	4.96035
ADH1_59to88_30snps_1	Randomly_Mutated_Window	CCTGCAATTATTAATCTTTTGTTTCCTCGTCATTGTTCTCGTTCCCTTTCTTCCTTGTGCAGAGGCGATTGGGTACAACTGTCACGCCCCAAGCATACAATCAACTATCTCATATACA	4.40808
ADH1_59to88_30snps_2	Randomly_Mutated_Window	CCTGCAATTATTAATCTTTTGTTTCCTCGTCATTGTTCTCGTTCCCTTTCTTCCTTGTCATGGGCGGGAATATCGTGCATGCTAGCCTCCAAGCATACAATCAACTATCTCATATACA	5.496
ADH1_89to118_30snps_1	Randomly_Mutated_Window	CCTGCAATTATTAATCTTTTGTTTCCTCGTCATTGTTCTCGTTCCCTTTCTTCCTTGTTTCTTTTTCTGCACAATATTTCAAGCTATATTGCTTGGGACTAAGCTCTCGCGGGTGCGT	5.23655
ADH1_89to118_30snps_2	Randomly_Mutated_Window	CCTGCAATTATTAATCTTTTGTTTCCTCGTCATTGTTCTCGTTCCCTTTCTTCCTTGTTTCTTTTTCTGCACAATATTTCAAGCTATAAATGCAGAGTTCAGCTAACCGCTCATATGT	NaN
CWP2_1to28_30snps_1	Randomly_Mutated_Window	AGCATGGGTCATCGACAGTGCAAGGAGATGCCATCCCTTTTCCTATCTTTGTTCTTTTCTTCTCATAATCAAGAATAAATAACTTCATCACATTCGCTACACACTAACAAGAAAAAAA	6.58234
CWP2_1to28_30snps_2	Randomly_Mutated_Window	GGCATCCTTGATCCAGAGCCGAAAACTCTGCCATCCCTTTTCCTATCTTTGTTCTTTTCTTCTCATAATCAAGAATAAATAACTTCATCACATTCGCTACACACTAACAAGAAAAAAA	6.22051
CWP2_29to58_30snps_1	Randomly_Mutated_Window	TCTTGTTCATCATTTTCAATTCTCTTCTGTTAGCATAAGAAAAAGATGCCAAATGAAACTTCTCATAATCAAGAATAAATAACTTCATCACATTCGCTACACACTAACAAGAAAAAAA	7.98299
CWP2_29to58_30snps_2	Randomly_Mutated_Window	TCTTGTTCATCATTTTCAATTCTCTTCTAAAACCGGACGAGTAGTAAGCGCAATAGGACTTCTCATAATCAAGAATAAATAACTTCATCACATTCGCTACACACTAACAAGAAAAAAA	8.57542
CWP2_59to88_30snps_1	Randomly_Mutated_Window	TCTTGTTCATCATTTTCAATTCTCTTCTTGCCATCCCTTTTCCTATCTTTGTTCTTTTTACACATGGTGGCCATTGTTTCGCACAATACACATTCGCTACACACTAACAAGAAAAAAA	8.31744
CWP2_59to88_30snps_2	Randomly_Mutated_Window	TCTTGTTCATCATTTTCAATTCTCTTCTTGCCATCCCTTTTCCTATCTTTGTTCTTTTGCATAACAGGGACCTGTATGCCCGAAGTCCCACATTCGCTACACACTAACAAGAAAAAAA	NaN
CWP2_89to118_30snps_1	Randomly_Mutated_Window	TCTTGTTCATCATTTTCAATTCTCTTCTTGCCATCCCTTTTCCTATCTTTGTTCTTTTCTTCTCATAATCAAGAATAAATAACTTCATTCGTAAGTGATTTTTACCGGGTTCCTGGTC	5.1431
CWP2_89to118_30snps_2	Randomly_Mutated_Window	TCTTGTTCATCATTTTCAATTCTCTTCTTGCCATCCCTTTTCCTATCTTTGTTCTTTTCTTCTCATAATCAAGAATAAATAACTTCATGTTGAAGCTCTTCTCAGGGTCTTTTTGGCC	1.2673
HSP12_1to28_30snps_1	Randomly_Mutated_Window	TGGATAAATCCGAGTGGCCGATAATCCGAATCTCTCTCTAATATATAGAAAAAAAAACCATCTGATTATTCGATAATCTCAAACAAACAACTCAAAACAAAAAAAACTAAATACAACA	8.37881
HSP12_1to28_30snps_2	Randomly_Mutated_Window	CTACTACTGGGGTTTGCACGGAGGCCCAAATCTCTCTCTAATATATAGAAAAAAAAACCATCTGATTATTCGATAATCTCAAACAAACAACTCAAAACAAAAAAAACTAAATACAACA	7.42108
HSP12_29to58_30snps_1	Randomly_Mutated_Window	ACTTCCTCAATTGCGTTTGATCTTATTTCTCTGGGTGTCCGCCGCAGCCTGCCGGTCTCATCTGATTATTCGATAATCTCAAACAAACAACTCAAAACAAAAAAAACTAAATACAACA	NaN
HSP12_29to58_30snps_2	Randomly_Mutated_Window	ACTTCCTCAATTGCGTTTGATCTTATTTCCGTAAAGAACTGCTCCATCTTGCCGGCTACATCTGATTATTCGATAATCTCAAACAAACAACTCAAAACAAAAAAAACTAAATACAACA	6.26023
HSP12_59to88_30snps_1	Randomly_Mutated_Window	ACTTCCTCAATTGCGTTTGATCTTATTTAATCTCTCTCTAATATATAGAAAAAAAAACGGAACTTGATGGTATATCAGCTCTTTTCTTAACTCAAAACAAAAAAAACTAAATACAACA	10.99
HSP12_59to88_30snps_2	Randomly_Mutated_Window	ACTTCCTCAATTGCGTTTGATCTTATTTAATCTCTCTCTAATATATAGAAAAAAAAACGCAGGCCACTCATCCATGAAAGTCGGCGCTAACTCAAAACAAAAAAAACTAAATACAACA	7.4642
HSP12_89to118_30snps_1	Randomly_Mutated_Window	ACTTCCTCAATTGCGTTTGATCTTATTTAATCTCTCTCTAATATATAGAAAAAAAAACCATCTGATTATTCGATAATCTCAAACAAACTCTCGTCTTACTGCGGGTTAGCCCTGCTGT	4.58396
HSP12_89to118_30snps_2	Randomly_Mutated_Window	ACTTCCTCAATTGCGTTTGATCTTATTTAATCTCTCTCTAATATATAGAAAAAAAAACCATCTGATTATTCGATAATCTCAAACAAACCGTATCGTCACTTCGGTTGGTTGGCGGTTT	6.90497
PGK1_1to28_30snps_1	Randomly_Mutated_Window	CGCCAGACAGCCTAGAAACAAGGCCGTGAGTTTTTCAAGTTCTTAGATGCTTTCTTTTTCTCTTTTTTACAGATCATCAAGGAAGTAATTATCTACTTTTTACAACAAATATAAAACA	5.69967
PGK1_1to28_30snps_2	Randomly_Mutated_Window	GCACTCGCGCCTAGTCGCGACTCGGTAGAGTTTTTCAAGTTCTTAGATGCTTTCTTTTTCTCTTTTTTACAGATCATCAAGGAAGTAATTATCTACTTTTTACAACAAATATAAAACA	5.03331
PGK1_29to58_30snps_1	Randomly_Mutated_Window	AATACATATTTGGTCTTTTCTAATTCGTCTCCACGTTGCACTCACCTACGAGCAGGGCTCTCTTTTTTACAGATCATCAAGGAAGTAATTATCTACTTTTTACAACAAATATAAAACA	7.35113
PGK1_29to58_30snps_2	Randomly_Mutated_Window	AATACATATTTGGTCTTTTCTAATTCGTGCGGGGCGGCTCAACCTATACTCAGACCGCTCTCTTTTTTACAGATCATCAAGGAAGTAATTATCTACTTTTTACAACAAATATAAAACA	4.81249
PGK1_59to88_30snps_1	Randomly_Mutated_Window	AATACATATTTGGTCTTTTCTAATTCGTAGTTTTTCAAGTTCTTAGATGCTTTCTTTTCAAACCCGAGCTGACGGTCTCCACCGAAGTTTATCTACTTTTTACAACAAATATAAAACA	6.40076
PGK1_59to88_30snps_2	Randomly_Mutated_Window	AATACATATTTGGTCTTTTCTAATTCGTAGTTTTTCAAGTTCTTAGATGCTTTCTTTTGAGAGCGCCGCAGCCGTGGGTTCACGCGGTTTATCTACTTTTTACAACAAATATAAAACA	3.59284
PGK1_89to118_30snps_1	Randomly_Mutated_Window	AATACATATTTGGTCTTTTCTAATTCGTAGTTTTTCAAGTTCTTAGATGCTTTCTTTTTCTCTTTTTTACAGATCATCAAGGAAGTAAAAGGGGTACGGGACTCGAGCGGCGCCCCGT	6.2333
PGK1_89to118_30snps_2	Randomly_Mutated_Window	AATACATATTTGGTCTTTTCTAATTCGTAGTTTTTCAAGTTCTTAGATGCTTTCTTTTTCTCTTTTTTACAGATCATCAAGGAAGTAAGAGCTGCTCAAGGGGCCAGTGCGGCCGTTG	2.15391
RPL3_1to28_30snps_1	Randomly_Mutated_Window	TATAGGCCCCTCTTAGGCGAAAGACCGATTGTCTTTGTCAATCCTCATCTTTCTTTACTCATTATTTCATTTCGGTTTTGTCATCTCTAGAACAACACAGTTACTACAACAATCAATC	6.43611
RPL3_1to28_30snps_2	Randomly_Mutated_Window	AACATCTGGAGTGTGCACTGCGGGACCATTGTCTTTGTCAATCCTCATCTTTCTTTACTCATTATTTCATTTCGGTTTTGTCATCTCTAGAACAACACAGTTACTACAACAATCAATC	5.93015
RPL3_29to58_30snps_1	Randomly_Mutated_Window	CTGGATATATAAAATACGATTTATTTAGGGCATCACCGTTCGGTATCCAGCCGAGCGTTCATTATTTCATTTCGGTTTTGTCATCTCTAGAACAACACAGTTACTACAACAATCAATC	12.3331
RPL3_29to58_30snps_2	Randomly_Mutated_Window	CTGGATATATAAAATACGATTTATTTAGAAAGACGCCCTGTCTGCTCGGCGCTCCCCGTCATTATTTCATTTCGGTTTTGTCATCTCTAGAACAACACAGTTACTACAACAATCAATC	12.1948
RPL3_59to88_30snps_1	Randomly_Mutated_Window	CTGGATATATAAAATACGATTTATTTAGTTGTCTTTGTCAATCCTCATCTTTCTTTACGACGAGCGGTCCAAGCTAAGGACACCTAGGAGAACAACACAGTTACTACAACAATCAATC	11.7011
RPL3_59to88_30snps_2	Randomly_Mutated_Window	CTGGATATATAAAATACGATTTATTTAGTTGTCTTTGTCAATCCTCATCTTTCTTTACGTGAAGGAGGCAAAGCAGAGGCCTTGGGGAAGAACAACACAGTTACTACAACAATCAATC	2.45315
RPL3_89to118_30snps_1	Randomly_Mutated_Window	CTGGATATATAAAATACGATTTATTTAGTTGTCTTTGTCAATCCTCATCTTTCTTTACTCATTATTTCATTTCGGTTTTGTCATCTCTTCTGTGTGGGTACCCGATGTGAGGATCCAA	NaN
RPL3_89to118_30snps_2	Randomly_Mutated_Window	CTGGATATATAAAATACGATTTATTTAGTTGTCTTTGTCAATCCTCATCTTTCTTTACTCATTATTTCATTTCGGTTTTGTCATCTCTCACTATTAGTTAAGTTCGATGGCTATGTAG	NaN
TDH2_1to28_30snps_1	Randomly_Mutated_Window	GAGGAAGGTCGTAAACCCGAGCCTCTCATCTATTCATTTTATTATTGTTTGTTTAAATGTTAAAAAAACCAAGAACTTAGTTTCAAATTAAATTCATCACACAAACAAACAAAACAAA	9.4696
TDH2_1to28_30snps_2	Randomly_Mutated_Window	CACCAGCCCGACTCACCGAAGAAACTATTCTATTCATTTTATTATTGTTTGTTTAAATGTTAAAAAAACCAAGAACTTAGTTTCAAATTAAATTCATCACACAAACAAACAAAACAAA	0.850275
TDH2_29to58_30snps_1	Randomly_Mutated_Window	TCATTCAAGATAGTTTTTTTCTTGTGTGGAGCCAACGGCCTGAGAACCACCGAGCTCCGTTAAAAAAACCAAGAACTTAGTTTCAAATTAAATTCATCACACAAACAAACAAAACAAA	6.54095
TDH2_29to58_30snps_2	Randomly_Mutated_Window	TCATTCAAGATAGTTTTTTTCTTGTGTGGTACGGTTAGCATAACCCCCCGAAGACGTGGTTAAAAAAACCAAGAACTTAGTTTCAAATTAAATTCATCACACAAACAAACAAAACAAA	5.89684
TDH2_59to88_30snps_1	Randomly_Mutated_Window	TCATTCAAGATAGTTTTTTTCTTGTGTGTCTATTCATTTTATTATTGTTTGTTTAAATCCCTGGCGCTAACTCTGACATTCGCATTGCTAAATTCATCACACAAACAAACAAAACAAA	NaN
TDH2_59to88_30snps_2	Randomly_Mutated_Window	TCATTCAAGATAGTTTTTTTCTTGTGTGTCTATTCATTTTATTATTGTTTGTTTAAATCGAGGCCTCCGTTCTTCACCTTACCGTGGATAAATTCATCACACAAACAAACAAAACAAA	7.65125
TDH2_89to118_30snps_1	Randomly_Mutated_Window	TCATTCAAGATAGTTTTTTTCTTGTGTGTCTATTCATTTTATTATTGTTTGTTTAAATGTTAAAAAAACCAAGAACTTAGTTTCAAATGTTGAATTGGCTCATCCTGGGTCTTCGTGT	2.3189
TDH2_89to118_30snps_2	Randomly_Mutated_Window	TCATTCAAGATAGTTTTTTTCTTGTGTGTCTATTCATTTTATTATTGTTTGTTTAAATGTTAAAAAAACCAAGAACTTAGTTTCAAATAGGTGGGCCTCGCACGCGGGTGTTGGTTCT	5.31514
RPL8A_1to28_30snps_1	Randomly_Mutated_Window	CCTTGCGCCATACTATGTCGTAACGCGCAGGCGAGGAATTTGTATCTATCAATTACTATTCCAGTTGTCAGTTTACATTGCTTACCCTCTATTATCACATCAAAACAACTAATTCGAA	3.3693
RPL8A_1to28_30snps_2	Randomly_Mutated_Window	GTCCTGGCCTTTATGCTTCATGAGGCTGAGGCGAGGAATTTGTATCTATCAATTACTATTCCAGTTGTCAGTTTACATTGCTTACCCTCTATTATCACATCAAAACAACTAATTCGAA	5.53659
RPL8A_29to58_30snps_1	Randomly_Mutated_Window	AAAAAAAAAGACGCTAAATTGTTTATAACTTTCCTTTCCACCAGGGGCAGCTAATGGCTTCCAGTTGTCAGTTTACATTGCTTACCCTCTATTATCACATCAAAACAACTAATTCGAA	7.20414
RPL8A_29to58_30snps_2	Randomly_Mutated_Window	AAAAAAAAAGACGCTAAATTGTTTATAAGTATATCCTTCCGTGCCTCCGAGGGACGCCTTCCAGTTGTCAGTTTACATTGCTTACCCTCTATTATCACATCAAAACAACTAATTCGAA	7.17466
RPL8A_59to88_30snps_1	Randomly_Mutated_Window	AAAAAAAAAGACGCTAAATTGTTTATAAAGGCGAGGAATTTGTATCTATCAATTACTAGGTTCAACTGTCAGAGCGCGCAGAGCTGAGCTATTATCACATCAAAACAACTAATTCGAA	12.5938
RPL8A_59to88_30snps_2	Randomly_Mutated_Window	AAAAAAAAAGACGCTAAATTGTTTATAAAGGCGAGGAATTTGTATCTATCAATTACTAGCGAGCAGTGATACGGTATACAAGGTGTAACTATTATCACATCAAAACAACTAATTCGAA	13.3462
RPL8A_89to118_30snps_1	Randomly_Mutated_Window	AAAAAAAAAGACGCTAAATTGTTTATAAAGGCGAGGAATTTGTATCTATCAATTACTATTCCAGTTGTCAGTTTACATTGCTTACCCTAACGCCGGCTGATCGGCATCTCGGACGATG	NaN
RPL8A_89to118_30snps_2	Randomly_Mutated_Window	AAAAAAAAAGACGCTAAATTGTTTATAAAGGCGAGGAATTTGTATCTATCAATTACTATTCCAGTTGTCAGTTTACATTGCTTACCCTGCTCGGCGGTGAATTCGTGCTGCGCGGCCC	5.58238
CDC19_1to28_30snps_1	Randomly_Mutated_Window	AGCAAACGCACTCCCCGGTCGTGCGGGAATCCTTTGGTTTTTTATTCTTAACTTGTTTATTATTCTCTCTTGTTTCTATTTACAAGACACCAATCAAAACAAATAAAACATCATCACA	5.73895
CDC19_1to28_30snps_2	Randomly_Mutated_Window	GACTAGGCAACTCAGCGGCCGGCACCGAATCCTTTGGTTTTTTATTCTTAACTTGTTTATTATTCTCTCTTGTTTCTATTTACAAGACACCAATCAAAACAAATAAAACATCATCACA	7.42676
CDC19_29to58_30snps_1	Randomly_Mutated_Window	CTACTCTTTTTCATATTCATTCTTTTTCTCGTGAATCGCCGCGGGCAGATTGAGAACGATTATTCTCTCTTGTTTCTATTTACAAGACACCAATCAAAACAAATAAAACATCATCACA	5.7375
CDC19_29to58_30snps_2	Randomly_Mutated_Window	CTACTCTTTTTCATATTCATTCTTTTTCCCGGACAACCGCGCCGCCGAACTGCCTCCAATTATTCTCTCTTGTTTCTATTTACAAGACACCAATCAAAACAAATAAAACATCATCACA	3.84326
CDC19_59to88_30snps_1	Randomly_Mutated_Window	CTACTCTTTTTCATATTCATTCTTTTTCATCCTTTGGTTTTTTATTCTTAACTTGTTTCCAGGCTGACGCCACGCGCCAGCTAGTCTAACCAATCAAAACAAATAAAACATCATCACA	5.16251
CDC19_59to88_30snps_2	Randomly_Mutated_Window	CTACTCTTTTTCATATTCATTCTTTTTCATCCTTTGGTTTTTTATTCTTAACTTGTTTTGGTGCTGTCACGTCCGGCGGAACAGCTTTACCAATCAAAACAAATAAAACATCATCACA	7.87336
CDC19_89to118_30snps_1	Randomly_Mutated_Window	CTACTCTTTTTCATATTCATTCTTTTTCATCCTTTGGTTTTTTATTCTTAACTTGTTTATTATTCTCTCTTGTTTCTATTTACAAGACCGTCTGAGGTTGGCCCTGTTGCAGCGTTAG	8.0646
CDC19_89to118_30snps_2	Randomly_Mutated_Window	CTACTCTTTTTCATATTCATTCTTTTTCATCCTTTGGTTTTTTATTCTTAACTTGTTTATTATTCTCTCTTGTTTCTATTTACAAGACGTTTGATCGGTACGCCCTTCTGATCAAGAG	7.97563
RPS14B_1to28_30snps_1	Randomly_Mutated_Window	CGCCCGCCTTTTCTTTGGCCGGAAGCCAGAGTATAAAAGCGGTACTATTCCTTCTGTATGCATCTTCATCGCAAGAGAGAAAAAGACTGAAATCAACAACTCCCAATAACAATTAAGA	15.2474
RPS14B_1to28_30snps_2	Randomly_Mutated_Window	CGATGTTAGTAGCTGGGGATTGCATAGAGAGTATAAAAGCGGTACTATTCCTTCTGTATGCATCTTCATCGCAAGAGAGAAAAAGACTGAAATCAACAACTCCCAATAACAATTAAGA	13.9684
RPS14B_29to58_30snps_1	Randomly_Mutated_Window	GATATAGTCGCAAGAACTTGCCTTCTACCGAAGAGGTTCATCAGTGGCCGGCCGGACGTGCATCTTCATCGCAAGAGAGAAAAAGACTGAAATCAACAACTCCCAATAACAATTAAGA	4.09647
RPS14B_29to58_30snps_2	Randomly_Mutated_Window	GATATAGTCGCAAGAACTTGCCTTCTACACCCGGGTTTATTACTGCGGCAGACGATAGTGCATCTTCATCGCAAGAGAGAAAAAGACTGAAATCAACAACTCCCAATAACAATTAAGA	4.80498
RPS14B_59to88_30snps_1	Randomly_Mutated_Window	GATATAGTCGCAAGAACTTGCCTTCTACGAGTATAAAAGCGGTACTATTCCTTCTGTAACGCAAGAATGTATCGCCTCTTCGCTTTGAGAAATCAACAACTCCCAATAACAATTAAGA	14.0559
RPS14B_59to88_30snps_2	Randomly_Mutated_Window	GATATAGTCGCAAGAACTTGCCTTCTACGAGTATAAAAGCGGTACTATTCCTTCTGTAATGTCGGCAGCTTACCTGATCTTTCCACTAGAAATCAACAACTCCCAATAACAATTAAGA	15.2028
RPS14B_89to118_30snps_1	Randomly_Mutated_Window	GATATAGTCGCAAGAACTTGCCTTCTACGAGTATAAAAGCGGTACTATTCCTTCTGTATGCATCTTCATCGCAAGAGAGAAAAAGACTCCTTCGCTGCTGCTTAGGACGTTCGCTCAC	7.33624
RPS14B_89to118_30snps_2	Randomly_Mutated_Window	GATATAGTCGCAAGAACTTGCCTTCTACGAGTATAAAAGCGGTACTATTCCTTCTGTATGCATCTTCATCGCAAGAGAGAAAAAGACTTTGCATCTACCAGGATTCCCGGTTCACGCC	5.49348
RPL10_1to28_30snps_1	Randomly_Mutated_Window	TTCTCTTAGACGTGCGGAGAACGCGGTCGGAGCAACCATTTATACATCCTTTCCGCAAGTGCTTTTGGAGTGGGACTTTCAAACTTTAAAGTACAGTATATCAAATAACTAATTCAAG	4.84424
RPL10_1to28_30snps_2	Randomly_Mutated_Window	GAGCCGAGAGGATCCTTCCACCCTCAACGGAGCAACCATTTATACATCCTTTCCGCAAGTGCTTTTGGAGTGGGACTTTCAAACTTTAAAGTACAGTATATCAAATAACTAATTCAAG	5.79554
RPL10_29to58_30snps_1	Randomly_Mutated_Window	AGAATAGTTTATAAAAAGATGTTGATGTTCGTAGGGGGACCTGTACATGACCGGATTTGTGCTTTTGGAGTGGGACTTTCAAACTTTAAAGTACAGTATATCAAATAACTAATTCAAG	9.69865
RPL10_29to58_30snps_2	Randomly_Mutated_Window	AGAATAGTTTATAAAAAGATGTTGATGTAATCGGCTGCGAGGACATGAGACATGAACGGTGCTTTTGGAGTGGGACTTTCAAACTTTAAAGTACAGTATATCAAATAACTAATTCAAG	0.738781
RPL10_59to88_30snps_1	Randomly_Mutated_Window	AGAATAGTTTATAAAAAGATGTTGATGTGGAGCAACCATTTATACATCCTTTCCGCAAAATGCGGGATGACACTGTACAATTCGAAGTAAGTACAGTATATCAAATAACTAATTCAAG	8.93076
RPL10_59to88_30snps_2	Randomly_Mutated_Window	AGAATAGTTTATAAAAAGATGTTGATGTGGAGCAACCATTTATACATCCTTTCCGCAATCCGCCGACAGAACTCGGCCAGGCCTCCATAAGTACAGTATATCAAATAACTAATTCAAG	8.91487
RPL10_89to118_30snps_1	Randomly_Mutated_Window	AGAATAGTTTATAAAAAGATGTTGATGTGGAGCAACCATTTATACATCCTTTCCGCAAGTGCTTTTGGAGTGGGACTTTCAAACTTTAGGTATGTCACGTAACTCACCTATTGGGTTT	NaN
RPL10_89to118_30snps_2	Randomly_Mutated_Window	AGAATAGTTTATAAAAAGATGTTGATGTGGAGCAACCATTTATACATCCTTTCCGCAAGTGCTTTTGGAGTGGGACTTTCAAACTTTACCACCGCAAGGCGTGCTCCTAGCGCAGTCA	NaN
RPL28_1to28_30snps_1	Randomly_Mutated_Window	ACTTGACGCACGAATAGAAGGTCCATCGTAAGATGGCGTTTGCTTTCTCCGTTGATTTTTTTCCTTCTTAGTGATTTTTTTGCATTAAATCCCAGAACAATCATCCAACTAATCAAGA	6.89978
RPL28_1to28_30snps_2	Randomly_Mutated_Window	TCTTAGAAGGCGTACGGGAGGCACATAATAAGATGGCGTTTGCTTTCTCCGTTGATTTTTTTCCTTCTTAGTGATTTTTTTGCATTAAATCCCAGAACAATCATCCAACTAATCAAGA	7.39543
RPL28_29to58_30snps_1	Randomly_Mutated_Window	CAAACCTTTCATCTGTATCCCGTATATTGCCATCACGCGGGTGGAAAAGTCGGAGAAATTTTCCTTCTTAGTGATTTTTTTGCATTAAATCCCAGAACAATCATCCAACTAATCAAGA	6.54217
RPL28_29to58_30snps_2	Randomly_Mutated_Window	CAAACCTTTCATCTGTATCCCGTATATTGGCACCTTGCAAGCGACAGATTTCACTAACTTTTCCTTCTTAGTGATTTTTTTGCATTAAATCCCAGAACAATCATCCAACTAATCAAGA	8.2589
RPL28_59to88_30snps_1	Randomly_Mutated_Window	CAAACCTTTCATCTGTATCCCGTATATTTAAGATGGCGTTTGCTTTCTCCGTTGATTTCCACTACAAGCCAATGGCACCGAAGGAACCATCCCAGAACAATCATCCAACTAATCAAGA	8.96952
RPL28_59to88_30snps_2	Randomly_Mutated_Window	CAAACCTTTCATCTGTATCCCGTATATTTAAGATGGCGTTTGCTTTCTCCGTTGATTTCAAGGAAAGGACCCTTGACAAACCACCATTATCCCAGAACAATCATCCAACTAATCAAGA	9.73693
RPL28_89to118_30snps_1	Randomly_Mutated_Window	CAAACCTTTCATCTGTATCCCGTATATTTAAGATGGCGTTTGCTTTCTCCGTTGATTTTTTTCCTTCTTAGTGATTTTTTTGCATTAAGATTGGAGCTGGATTATTCCGGCGATCTAG	9.23517
RPL28_89to118_30snps_2	Randomly_Mutated_Window	CAAACCTTTCATCTGTATCCCGTATATTTAAGATGGCGTTTGCTTTCTCCGTTGATTTTTTTCCTTCTTAGTGATTTTTTTGCATTAAGGATAGTTCGTTGGCAAGGGGGCTAAGTAC	10.9196
LYS20_1to28_30snps_1	Randomly_Mutated_Window	GGTATTGGCTGGGCCCTGCTCCGAGAGGAAAGTGTATTTGATATGTTCCCGTTTAGTTTATTCTTGTTTCTTATCTACATAACAAACAAAGGAAGGACCCTGTATTGTTTTCCTAAAG	NaN
LYS20_1to28_30snps_2	Randomly_Mutated_Window	GCCACTTATGGGCGTTAGAGGGGAGATAAAAGTGTATTTGATATGTTCCCGTTTAGTTTATTCTTGTTTCTTATCTACATAACAAACAAAGGAAGGACCCTGTATTGTTTTCCTAAAG	6.23864
LYS20_29to58_30snps_1	Randomly_Mutated_Window	ATATAAATGATATTGGCTGCTTATCGATTGCCACATCGGATGCAAACTGACCCACTAATATTCTTGTTTCTTATCTACATAACAAACAAAGGAAGGACCCTGTATTGTTTTCCTAAAG	6.95418
LYS20_29to58_30snps_2	Randomly_Mutated_Window	ATATAAATGATATTGGCTGCTTATCGATGGGCAAGGCAAACCCGCCCGAAAAGAGAGGTATTCTTGTTTCTTATCTACATAACAAACAAAGGAAGGACCCTGTATTGTTTTCCTAAAG	5.39421
LYS20_59to88_30snps_1	Randomly_Mutated_Window	ATATAAATGATATTGGCTGCTTATCGATAAAGTGTATTTGATATGTTCCCGTTTAGTTAGCGTAGAACCAACGGGCTATGCGTGCCATAAGGAAGGACCCTGTATTGTTTTCCTAAAG	2.69229
LYS20_59to88_30snps_2	Randomly_Mutated_Window	ATATAAATGATATTGGCTGCTTATCGATAAAGTGTATTTGATATGTTCCCGTTTAGTTGTGGTCCTCCAAGGCATCTGCCGGGGTCTTAAGGAAGGACCCTGTATTGTTTTCCTAAAG	2.27593
LYS20_89to118_30snps_1	Randomly_Mutated_Window	ATATAAATGATATTGGCTGCTTATCGATAAAGTGTATTTGATATGTTCCCGTTTAGTTTATTCTTGTTTCTTATCTACATAACAAACAGGCATGCAGGTGACGGAGCACGGGGGCTTT	NaN
LYS20_89to118_30snps_2	Randomly_Mutated_Window	ATATAAATGATATTGGCTGCTTATCGATAAAGTGTATTTGATATGTTCCCGTTTAGTTTATTCTTGTTTCTTATCTACATAACAAACAGTACGTATGAGTCAATGGTCGCGTAGCGTC	NaN
RPP0_1to28_30snps_1	Randomly_Mutated_Window	TGTATCGCTGCCACGACCTAGTGGAGGGCTTTTTTCAAGTTTCAGCCATAAGATACATAAGCGGAATACCTTTAAACATCCTGCAAACAGTCTAATAAATACGTATAATAAGTTTGAA	NaN
RPP0_1to28_30snps_2	Randomly_Mutated_Window	TCTCGAGCTGCCCTAACGGAGTCGATAACTTTTTTCAAGTTTCAGCCATAAGATACATAAGCGGAATACCTTTAAACATCCTGCAAACAGTCTAATAAATACGTATAATAAGTTTGAA	6.81571
RPP0_29to58_30snps_1	Randomly_Mutated_Window	AAAGATTAACAATATCTAATTCTCGATTTCGGCAGTGGAGGGGTTTAGCCTTCCTACGAAGCGGAATACCTTTAAACATCCTGCAAACAGTCTAATAAATACGTATAATAAGTTTGAA	5.12897
RPP0_29to58_30snps_2	Randomly_Mutated_Window	AAAGATTAACAATATCTAATTCTCGATTTCGGACAGGGCCAGTCATACGCGATAGAGGAAGCGGAATACCTTTAAACATCCTGCAAACAGTCTAATAAATACGTATAATAAGTTTGAA	6.70422
RPP0_59to88_30snps_1	Randomly_Mutated_Window	AAAGATTAACAATATCTAATTCTCGATTCTTTTTTCAAGTTTCAGCCATAAGATACATGCATATTGGTGTAGCGGTTCAATCTTCGTGAGTCTAATAAATACGTATAATAAGTTTGAA	8.7382
RPP0_59to88_30snps_2	Randomly_Mutated_Window	AAAGATTAACAATATCTAATTCTCGATTCTTTTTTCAAGTTTCAGCCATAAGATACATGTTGTTGCCTTAGGCTGCGCAGAAATTGGGAGTCTAATAAATACGTATAATAAGTTTGAA	7.52347
RPP0_89to118_30snps_1	Randomly_Mutated_Window	AAAGATTAACAATATCTAATTCTCGATTCTTTTTTCAAGTTTCAGCCATAAGATACATAAGCGGAATACCTTTAAACATCCTGCAAACCTCGATGACCCCTATACATGCCCTGGGATT	NaN
RPP0_89to118_30snps_2	Randomly_Mutated_Window	AAAGATTAACAATATCTAATTCTCGATTCTTTTTTCAAGTTTCAGCCATAAGATACATAAGCGGAATACCTTTAAACATCCTGCAAACGCATGGTCGTTGCGAGCCTGGGTAGCCTGG	NaN
RPL7B_1to28_30snps_1	Randomly_Mutated_Window	GCGCATCTCCTGTAGTTCCCGACAACCCGCTCTTCCTATTGCTTTTTCAATAGAGGCTTAAATCTTCCTCGTTTGTAGAGTAAGTAGACCCATATTACAAATCTCCATCAACGTCATA	6.35041
RPL7B_1to28_30snps_2	Randomly_Mutated_Window	GCTCCGCCCTGCTACCGCGATCGGGGTGGCTCTTCCTATTGCTTTTTCAATAGAGGCTTAAATCTTCCTCGTTTGTAGAGTAAGTAGACCCATATTACAAATCTCCATCAACGTCATA	3.8107
RPL7B_29to58_30snps_1	Randomly_Mutated_Window	AAAGTATATAAAAGTGAAATATTTCAGACTAAGCGTCTGCCTCGAGAGTGCTTGACACTAAATCTTCCTCGTTTGTAGAGTAAGTAGACCCATATTACAAATCTCCATCAACGTCATA	16.1291
RPL7B_29to58_30snps_2	Randomly_Mutated_Window	AAAGTATATAAAAGTGAAATATTTCAGAAGATGCGAGGAGAAGGAAGAGCGGTTTAGGTAAATCTTCCTCGTTTGTAGAGTAAGTAGACCCATATTACAAATCTCCATCAACGTCATA	15.8415
RPL7B_59to88_30snps_1	Randomly_Mutated_Window	AAAGTATATAAAAGTGAAATATTTCAGAGCTCTTCCTATTGCTTTTTCAATAGAGGCTACCCCGGGGTCGCCCGCAGTTAATGAGTATCCCATATTACAAATCTCCATCAACGTCATA	8.17783
RPL7B_59to88_30snps_2	Randomly_Mutated_Window	AAAGTATATAAAAGTGAAATATTTCAGAGCTCTTCCTATTGCTTTTTCAATAGAGGCTATCGCTGGAACGTGCCCCCTGCGTGACCACCCCATATTACAAATCTCCATCAACGTCATA	11.6529
RPL7B_89to118_30snps_1	Randomly_Mutated_Window	AAAGTATATAAAAGTGAAATATTTCAGAGCTCTTCCTATTGCTTTTTCAATAGAGGCTTAAATCTTCCTCGTTTGTAGAGTAAGTAGAAAACAGGATTCCTGTCTACCGGTTACGTGT	17.5365
RPL7B_89to118_30snps_2	Randomly_Mutated_Window	AAAGTATATAAAAGTGAAATATTTCAGAGCTCTTCCTATTGCTTTTTCAATAGAGGCTTAAATCTTCCTCGTTTGTAGAGTAAGTAGAGTGTATCCGGTGCGTGAATGTTTTTGGGGT	NaN
RPL4A_1to28_30snps_1	Randomly_Mutated_Window	TGTGGGTGTCGGAACGCCCGGCGATTCAGTATCTCCATCACATTTCTTTTAGCCTCGCAACTTGTACTTTTCATCACTTTTCTTGTAATTTAGCAATATCCCAAGAACAATCATCGAA	5.42211
RPL4A_1to28_30snps_2	Randomly_Mutated_Window	CTGCCGTTTGGTCCCTCTGCTCTAGGGAGTATCTCCATCACATTTCTTTTAGCCTCGCAACTTGTACTTTTCATCACTTTTCTTGTAATTTAGCAATATCCCAAGAACAATCATCGAA	5.50249
RPL4A_29to58_30snps_1	Randomly_Mutated_Window	AAAAAAAAAAAATTTATATAAACGAATGTATGACTTGCTTAGCAGTGACCCTGACAAAAACTTGTACTTTTCATCACTTTTCTTGTAATTTAGCAATATCCCAAGAACAATCATCGAA	NaN
RPL4A_29to58_30snps_2	Randomly_Mutated_Window	AAAAAAAAAAAATTTATATAAACGAATGCCTCGCGGCATGGGCAGTCGAACTTTAATTAACTTGTACTTTTCATCACTTTTCTTGTAATTTAGCAATATCCCAAGAACAATCATCGAA	18.2013
RPL4A_59to88_30snps_1	Randomly_Mutated_Window	AAAAAAAAAAAATTTATATAAACGAATGGTATCTCCATCACATTTCTTTTAGCCTCGCTTGAACAGTGACAAGGTCGGGGATACCCCCTTTAGCAATATCCCAAGAACAATCATCGAA	8.19908
RPL4A_59to88_30snps_2	Randomly_Mutated_Window	AAAAAAAAAAAATTTATATAAACGAATGGTATCTCCATCACATTTCTTTTAGCCTCGCCTTGACATGCGGGGGGACGAGCAAAGTGCTTTTAGCAATATCCCAAGAACAATCATCGAA	13.5726
RPL4A_89to118_30snps_1	Randomly_Mutated_Window	AAAAAAAAAAAATTTATATAAACGAATGGTATCTCCATCACATTTCTTTTAGCCTCGCAACTTGTACTTTTCATCACTTTTCTTGTAAGAACATCGGTGAATCTCCCTGCGTGATCGC	14.8199
RPL4A_89to118_30snps_2	Randomly_Mutated_Window	AAAAAAAAAAAATTTATATAAACGAATGGTATCTCCATCACATTTCTTTTAGCCTCGCAACTTGTACTTTTCATCACTTTTCTTGTAACCCCATCCACAAGGGCACGGGCCGCCATTC	13.3331
HHF2_1to28_30snps_1	Randomly_Mutated_Window	ACGACCACTTAGTAGCCCTATTTCGAACTTTTTTTCGCTTAATTTATTCTTTTCTCTATCTTTTTTCCTACATCTTGTTCAAAAGAGTAGCAAAAACAACAATCAATACAATAAAATA	9.46205
HHF2_1to28_30snps_2	Randomly_Mutated_Window	CACTTTAATACGATCTCCGAGTCAGAAGTTTTTTTCGCTTAATTTATTCTTTTCTCTATCTTTTTTCCTACATCTTGTTCAAAAGAGTAGCAAAAACAACAATCAATACAATAAAATA	10.0032
HHF2_29to58_30snps_1	Randomly_Mutated_Window	TTAGGATGAGGCGGTGAAAGAGATTTTTCGGGACAAAGCAGCGAGGCATCAGCGGACTTCTTTTTTCCTACATCTTGTTCAAAAGAGTAGCAAAAACAACAATCAATACAATAAAATA	5.65761
HHF2_29to58_30snps_2	Randomly_Mutated_Window	TTAGGATGAGGCGGTGAAAGAGATTTTTCGCAAAGATTGGGTACGTCGTCCCCTGGCGTCTTTTTTCCTACATCTTGTTCAAAAGAGTAGCAAAAACAACAATCAATACAATAAAATA	NaN
HHF2_59to88_30snps_1	Randomly_Mutated_Window	TTAGGATGAGGCGGTGAAAGAGATTTTTTTTTTTTCGCTTAATTTATTCTTTTCTCTACACCCACGAAGTGGAGACACCATTGGACCGAGCAAAAACAACAATCAATACAATAAAATA	NaN
HHF2_59to88_30snps_2	Randomly_Mutated_Window	TTAGGATGAGGCGGTGAAAGAGATTTTTTTTTTTTCGCTTAATTTATTCTTTTCTCTAGTCCAGCGGAACATAGCACGCAGTTCCTAGAGCAAAAACAACAATCAATACAATAAAATA	5.03036
HHF2_89to118_30snps_1	Randomly_Mutated_Window	TTAGGATGAGGCGGTGAAAGAGATTTTTTTTTTTTCGCTTAATTTATTCTTTTCTCTATCTTTTTTCCTACATCTTGTTCAAAAGAGTTCAGCCGGTGCACGATCGGGTGTCCCCCCT	2.71322
HHF2_89to118_30snps_2	Randomly_Mutated_Window	TTAGGATGAGGCGGTGAAAGAGATTTTTTTTTTTTCGCTTAATTTATTCTTTTCTCTATCTTTTTTCCTACATCTTGTTCAAAAGAGTCTGGTGGTACCAGGATGGCGTCGCCGGTAG	NaN
RPL15A_1to28_30snps_1	Randomly_Mutated_Window	ACATCAGCCTGGGACCGTAACGTTAGCAATTTAACTGCTATTTCTCACGTTTCTTTCCCTATCCTTAAGTAATTCTTTTACAATCTAAGAAAACCACGATCAAACAAATAAATCAGCA	9.83539
RPL15A_1to28_30snps_2	Randomly_Mutated_Window	ATCATTCGCCTGGCCACTGTCATCCACTATTTAACTGCTATTTCTCACGTTTCTTTCCCTATCCTTAAGTAATTCTTTTACAATCTAAGAAAACCACGATCAAACAAATAAATCAGCA	NaN
RPL15A_29to58_30snps_1	Randomly_Mutated_Window	GATGGCATTGCATTTTTACCACCGGTACCGACGTTATGACGGGGCGCAACAGTAGAGACTATCCTTAAGTAATTCTTTTACAATCTAAGAAAACCACGATCAAACAAATAAATCAGCA	5.04983
RPL15A_29to58_30snps_2	Randomly_Mutated_Window	GATGGCATTGCATTTTTACCACCGGTACTAGATCACCGAGACAGGATATGCGAAGAGTCTATCCTTAAGTAATTCTTTTACAATCTAAGAAAACCACGATCAAACAAATAAATCAGCA	6.21845
RPL15A_59to88_30snps_1	Randomly_Mutated_Window	GATGGCATTGCATTTTTACCACCGGTACATTTAACTGCTATTTCTCACGTTTCTTTCCTGTAGTAGCGCCGTGGTGAACCTGTGAGGCGAAAACCACGATCAAACAAATAAATCAGCA	4.30971
RPL15A_59to88_30snps_2	Randomly_Mutated_Window	GATGGCATTGCATTTTTACCACCGGTACATTTAACTGCTATTTCTCACGTTTCTTTCCAAGCAAAGTTCATCGAAGAGGCTCCGGACGGAAAACCACGATCAAACAAATAAATCAGCA	6.73427
RPL15A_89to118_30snps_1	Randomly_Mutated_Window	GATGGCATTGCATTTTTACCACCGGTACATTTAACTGCTATTTCTCACGTTTCTTTCCCTATCCTTAAGTAATTCTTTTACAATCTAACGGCGTGGTATGATCCAGCTAGGGATCAGT	NaN
RPL15A_89to118_30snps_2	Randomly_Mutated_Window	GATGGCATTGCATTTTTACCACCGGTACATTTAACTGCTATTTCTCACGTTTCTTTCCCTATCCTTAAGTAATTCTTTTACAATCTAAAGGTGTGCACGGATCCACCGACTGGAGCTG	6.63301
RPL25_1to28_30snps_1	Randomly_Mutated_Window	CCAAGCGGCTGACACCGCCCGCGTGTGCTTAAAATTATTTTAAAACAATTTTAAATGTATCTCATATGCTTTTCTTCTGCTGTTGAAAAGGCTAAACAAAGAAGATCAATAAGATAAA	NaN
RPL25_1to28_30snps_2	Randomly_Mutated_Window	CCAATCGGTGAAAGCGTTTAGGGTAGGGTTAAAATTATTTTAAAACAATTTTAAATGTATCTCATATGCTTTTCTTCTGCTGTTGAAAAGGCTAAACAAAGAAGATCAATAAGATAAA	8.46832
RPL25_29to58_30snps_1	Randomly_Mutated_Window	ATGCATACAATCTTTTAGATATTATCTTCAGGGTGCCGCCGCTGTTTGGACGCGCGCCATCTCATATGCTTTTCTTCTGCTGTTGAAAAGGCTAAACAAAGAAGATCAATAAGATAAA	NaN
RPL25_29to58_30snps_2	Randomly_Mutated_Window	ATGCATACAATCTTTTAGATATTATCTTGGCCTCAAGGCGGTGTGGCGAAGACGCGAAATCTCATATGCTTTTCTTCTGCTGTTGAAAAGGCTAAACAAAGAAGATCAATAAGATAAA	4.77716
RPL25_59to88_30snps_1	Randomly_Mutated_Window	ATGCATACAATCTTTTAGATATTATCTTTTAAAATTATTTTAAAACAATTTTAAATGTGATAAGCCGAAAACGGGAAGATCAGGCTCCAGGCTAAACAAAGAAGATCAATAAGATAAA	8.32183
RPL25_59to88_30snps_2	Randomly_Mutated_Window	ATGCATACAATCTTTTAGATATTATCTTTTAAAATTATTTTAAAACAATTTTAAATGTCCGAGTAGAATAGAAAGATGAAGTCAATTCAGGCTAAACAAAGAAGATCAATAAGATAAA	6.62636
RPL25_89to118_30snps_1	Randomly_Mutated_Window	ATGCATACAATCTTTTAGATATTATCTTTTAAAATTATTTTAAAACAATTTTAAATGTATCTCATATGCTTTTCTTCTGCTGTTGAAAGCTGCTGGGGGTCGGCGGTTCAGGCTCTCG	3.03183
RPL25_89to118_30snps_2	Randomly_Mutated_Window	ATGCATACAATCTTTTAGATATTATCTTTTAAAATTATTTTAAAACAATTTTAAATGTATCTCATATGCTTTTCTTCTGCTGTTGAAATTCTCGGTAGGCACCCCCATGGTTCCACTC	NaN
HXT1_1to28_30snps_1	Randomly_Mutated_Window	GGGGCCGGGCGCAACTACGGCATTAGCGAATCAATTCCATCTGGGGTCTCATGTTCTTTCCCCACCTTAAAATCTATAAAGATATCATAATCGTCAACTAGTTGATATACGTAAAATC	1.33355
HXT1_1to28_30snps_2	Randomly_Mutated_Window	ACCAGATAGGCTAGGGTGGCAGTTGTCGAATCAATTCCATCTGGGGTCTCATGTTCTTTCCCCACCTTAAAATCTATAAAGATATCATAATCGTCAACTAGTTGATATACGTAAAATC	NaN
HXT1_29to58_30snps_1	Randomly_Mutated_Window	TTATATATAAAGGCAACAATGTCCCCATCCAACGCATGGGACTAAACACATGTCGTACTCCCCACCTTAAAATCTATAAAGATATCATAATCGTCAACTAGTTGATATACGTAAAATC	9.31374
HXT1_29to58_30snps_2	Randomly_Mutated_Window	TTATATATAAAGGCAACAATGTCCCCATCTGAGTGCTGCCAAATCAATAATGTAGTAATCCCCACCTTAAAATCTATAAAGATATCATAATCGTCAACTAGTTGATATACGTAAAATC	NaN
HXT1_59to88_30snps_1	Randomly_Mutated_Window	TTATATATAAAGGCAACAATGTCCCCATAATCAATTCCATCTGGGGTCTCATGTTCTTGTTAGGGGCCGGGTAGCTGTTTTGGCATTAAATCGTCAACTAGTTGATATACGTAAAATC	NaN
HXT1_59to88_30snps_2	Randomly_Mutated_Window	TTATATATAAAGGCAACAATGTCCCCATAATCAATTCCATCTGGGGTCTCATGTTCTTAGAGTTGTGCCTTGGGACACGGCGCTCTGGAATCGTCAACTAGTTGATATACGTAAAATC	6.20539
HXT1_89to118_30snps_1	Randomly_Mutated_Window	TTATATATAAAGGCAACAATGTCCCCATAATCAATTCCATCTGGGGTCTCATGTTCTTTCCCCACCTTAAAATCTATAAAGATATCATCGAACCATGTAGTCATGCTCTGAAGTCTAT	NaN
HXT1_89to118_30snps_2	Randomly_Mutated_Window	TTATATATAAAGGCAACAATGTCCCCATAATCAATTCCATCTGGGGTCTCATGTTCTTTCCCCACCTTAAAATCTATAAAGATATCATCCGGCGGGGTCTCGCCTCCGCGTGTTCCAT	1.06742
RPS13_1to28_30snps_1	Randomly_Mutated_Window	ATGTATCCGCCCGTAACCATACGCCTACTCACAGTCGTGATTGAATTAACAATTTCTTTCTCATTAATATTTATTCTAAACGGTTAACCACTAAATCAATCAACAACAATCAGTCAAA	7.49317
RPS13_1to28_30snps_2	Randomly_Mutated_Window	TTACTCGGCGGCGCGATTGGTCAGGCATTCACAGTCGTGATTGAATTAACAATTTCTTTCTCATTAATATTTATTCTAAACGGTTAACCACTAAATCAATCAACAACAATCAGTCAAA	7.65232
RPS13_29to58_30snps_1	Randomly_Mutated_Window	GATGGAAATTTATGTTGGCCGACATATAAAGACCGGAATCCCCTCCGCGAGTAGAAAGTCTCATTAATATTTATTCTAAACGGTTAACCACTAAATCAATCAACAACAATCAGTCAAA	16.2832
RPS13_29to58_30snps_2	Randomly_Mutated_Window	GATGGAAATTTATGTTGGCCGACATATAGTGTCAAACCTTCACGTCATGTCGGAAACGTCTCATTAATATTTATTCTAAACGGTTAACCACTAAATCAATCAACAACAATCAGTCAAA	5.49441
RPS13_59to88_30snps_1	Randomly_Mutated_Window	GATGGAAATTTATGTTGGCCGACATATATCACAGTCGTGATTGAATTAACAATTTCTTCTCGGGGTTATAAAGACTCCCCGATGCGTGCACTAAATCAATCAACAACAATCAGTCAAA	6.19819
RPS13_59to88_30snps_2	Randomly_Mutated_Window	GATGGAAATTTATGTTGGCCGACATATATCACAGTCGTGATTGAATTAACAATTTCTTAGCTGCCGGCCGGCTCGACCCGGCTACTTACACTAAATCAATCAACAACAATCAGTCAAA	5.78026
RPS13_89to118_30snps_1	Randomly_Mutated_Window	GATGGAAATTTATGTTGGCCGACATATATCACAGTCGTGATTGAATTAACAATTTCTTTCTCATTAATATTTATTCTAAACGGTTAACAGGACGGGTCTCAGGATGAGGCACCCATTC	NaN
RPS13_89to118_30snps_2	Randomly_Mutated_Window	GATGGAAATTTATGTTGGCCGACATATATCACAGTCGTGATTGAATTAACAATTTCTTTCTCATTAATATTTATTCTAAACGGTTAACGGTCGGCAAGTGGCCGTTAGTGACTGGTTG	3.1245
RPL26A_1to28_30snps_1	Randomly_Mutated_Window	GCCGCCACGTGCTCCCAGGCATTCAATCAGTACAAGATACTAAGAAGACTATAACAACAGAAGACAATTTTGTAGTGCGATTCTATATTATTGACGTAACCAACAAAAAAGTATCAGA	NaN
RPL26A_1to28_30snps_2	Randomly_Mutated_Window	GGGTCGGTTAGATAAAAGCTTGTACAACAGTACAAGATACTAAGAAGACTATAACAACAGAAGACAATTTTGTAGTGCGATTCTATATTATTGACGTAACCAACAAAAAAGTATCAGA	8.81779
RPL26A_29to58_30snps_1	Randomly_Mutated_Window	TAACGACGACAGCTTGTCTAGAAGGCGACCCCTGTAGAGAGCTTCCCCGGCACTGGGAAGAAGACAATTTTGTAGTGCGATTCTATATTATTGACGTAACCAACAAAAAAGTATCAGA	2.56236
RPL26A_29to58_30snps_2	Randomly_Mutated_Window	TAACGACGACAGCTTGTCTAGAAGGCGATTGGGGCTTATACTTACCCCTATATTGTCAAGAAGACAATTTTGTAGTGCGATTCTATATTATTGACGTAACCAACAAAAAAGTATCAGA	6.07268
RPL26A_59to88_30snps_1	Randomly_Mutated_Window	TAACGACGACAGCTTGTCTAGAAGGCGAAGTACAAGATACTAAGAAGACTATAACAACCACTTTGGGAGACTCTTCTGAGAATAGGTCTATTGACGTAACCAACAAAAAAGTATCAGA	6.87325
RPL26A_59to88_30snps_2	Randomly_Mutated_Window	TAACGACGACAGCTTGTCTAGAAGGCGAAGTACAAGATACTAAGAAGACTATAACAACTTCCTCTCCAAGCCCGTACTCGAGTGCGGATATTGACGTAACCAACAAAAAAGTATCAGA	5.68751
RPL26A_89to118_30snps_1	Randomly_Mutated_Window	TAACGACGACAGCTTGTCTAGAAGGCGAAGTACAAGATACTAAGAAGACTATAACAACAGAAGACAATTTTGTAGTGCGATTCTATATGTCCATTTCCTTGTGAGCTGTTCATGATAC	NaN
RPL26A_89to118_30snps_2	Randomly_Mutated_Window	TAACGACGACAGCTTGTCTAGAAGGCGAAGTACAAGATACTAAGAAGACTATAACAACAGAAGACAATTTTGTAGTGCGATTCTATATCTAAACATCTGAACGTGGGTGGTCCAGTAG	5.4003
ALD6_1to28_30snps_1	Randomly_Mutated_Window	CAGTTTTTAGATACGCATGGTGCACTATAGTGTTCAGTCTTTTACTTCTCTTGTTTTATAGAAGAAAAAACATCAAGAAACATCTTTAACATACACAAACACATACTATCAGAATACA	7.87264
ALD6_1to28_30snps_2	Randomly_Mutated_Window	GGGGCTTACGATCACGGGAGGTGAGAATAGTGTTCAGTCTTTTACTTCTCTTGTTTTATAGAAGAAAAAACATCAAGAAACATCTTTAACATACACAAACACATACTATCAGAATACA	NaN
ALD6_29to58_30snps_1	Randomly_Mutated_Window	ATAAGAAGTTTGGTAATATTCAATTCGATCGCAAACCCAAGGCTAAAGAGGACACAGGTAGAAGAAAAAACATCAAGAAACATCTTTAACATACACAAACACATACTATCAGAATACA	8.29261
ALD6_29to58_30snps_2	Randomly_Mutated_Window	ATAAGAAGTTTGGTAATATTCAATTCGACCGCGATCTGTCCGGTAAGTCTAGAAAGAGTAGAAGAAAAAACATCAAGAAACATCTTTAACATACACAAACACATACTATCAGAATACA	7.17477
ALD6_59to88_30snps_1	Randomly_Mutated_Window	ATAAGAAGTTTGGTAATATTCAATTCGAAGTGTTCAGTCTTTTACTTCTCTTGTTTTAGTAGCATCTTTGTTGTCCCGGCGGGTAGCGACATACACAAACACATACTATCAGAATACA	7.58914
ALD6_59to88_30snps_2	Randomly_Mutated_Window	ATAAGAAGTTTGGTAATATTCAATTCGAAGTGTTCAGTCTTTTACTTCTCTTGTTTTACCATTAGCGTCGGGCAGGCTCGTCAGGCCCACATACACAAACACATACTATCAGAATACA	4.52596
ALD6_89to118_30snps_1	Randomly_Mutated_Window	ATAAGAAGTTTGGTAATATTCAATTCGAAGTGTTCAGTCTTTTACTTCTCTTGTTTTATAGAAGAAAAAACATCAAGAAACATCTTTACAGCCGCGCTGATGTCTGCCGTGACGCGGC	NaN
ALD6_89to118_30snps_2	Randomly_Mutated_Window	ATAAGAAGTTTGGTAATATTCAATTCGAAGTGTTCAGTCTTTTACTTCTCTTGTTTTATAGAAGAAAAAACATCAAGAAACATCTTTATGCCGGCGTCTGGTTGTGGTGAGTCGCTAT	2.3189
HHT2_1to28_30snps_1	Randomly_Mutated_Window	GACGGCACTTATCCGACCAATCAAGAGGTTTATATAGGACCACTGTTTTGTGACTTCCACTTTGGCCCTTCCAACTGTTCTTCCCCTTTTACTAAAGGATCCAAGCAAACACTCCACA	9.09191
HHT2_1to28_30snps_2	Randomly_Mutated_Window	GCGTGCAGGCACCGTAGAACTCCTGGTCTTTATATAGGACCACTGTTTTGTGACTTCCACTTTGGCCCTTCCAACTGTTCTTCCCCTTTTACTAAAGGATCCAAGCAAACACTCCACA	9.57418
HHT2_29to58_30snps_1	Randomly_Mutated_Window	TGTATATAAATAATCTTTTTCTTGTTCTGGGTGCAGACGATGGAAAAAGAAACGCATTACTTTGGCCCTTCCAACTGTTCTTCCCCTTTTACTAAAGGATCCAAGCAAACACTCCACA	NaN
HHT2_29to58_30snps_2	Randomly_Mutated_Window	TGTATATAAATAATCTTTTTCTTGTTCTCGACGTCCTTGGGTTCAGCGCTAAGTGAAGACTTTGGCCCTTCCAACTGTTCTTCCCCTTTTACTAAAGGATCCAAGCAAACACTCCACA	NaN
HHT2_59to88_30snps_1	Randomly_Mutated_Window	TGTATATAAATAATCTTTTTCTTGTTCTTTTATATAGGACCACTGTTTTGTGACTTCCGGGCATATGACCTTGCGGAGGACGGAAAGGTTACTAAAGGATCCAAGCAAACACTCCACA	12.2395
HHT2_59to88_30snps_2	Randomly_Mutated_Window	TGTATATAAATAATCTTTTTCTTGTTCTTTTATATAGGACCACTGTTTTGTGACTTCCGACGGTCTTAAGATGTGCTCAAACTAGGGCTTACTAAAGGATCCAAGCAAACACTCCACA	NaN
HHT2_89to118_30snps_1	Randomly_Mutated_Window	TGTATATAAATAATCTTTTTCTTGTTCTTTTATATAGGACCACTGTTTTGTGACTTCCACTTTGGCCCTTCCAACTGTTCTTCCCCTTACTACCTCCCCATGCGTGGGCATACAGTGT	NaN
HHT2_89to118_30snps_2	Randomly_Mutated_Window	TGTATATAAATAATCTTTTTCTTGTTCTTTTATATAGGACCACTGTTTTGTGACTTCCACTTTGGCCCTTCCAACTGTTCTTCCCCTTAGGTGTCGCAGGTATTTGTGGAGGCTTCAG	13.2408
HHT1_1to28_30snps_1	Randomly_Mutated_Window	TCCTCCATACGCGGCCCTGGATGCGTAGCTTCGGGATACATCTCTTTCCTCAACCTTTTATATTCTTTCTTTCTAGTTAATAAGAAAAACATCTAACATAAATATATAAACGCAAACA	NaN
HHT1_1to28_30snps_2	Randomly_Mutated_Window	TGCGAGTTGCCCCCCGTTCGGCATAGAACTTCGGGATACATCTCTTTCCTCAACCTTTTATATTCTTTCTTTCTAGTTAATAAGAAAAACATCTAACATAAATATATAAACGCAAACA	NaN
HHT1_29to58_30snps_1	Randomly_Mutated_Window	GAAATACATATATAAAAGACTGTGTATTGCGAATCTATGTGTAAGACAGCTCTATCGATATATTCTTTCTTTCTAGTTAATAAGAAAAACATCTAACATAAATATATAAACGCAAACA	13.5742
HHT1_29to58_30snps_2	Randomly_Mutated_Window	GAAATACATATATAAAAGACTGTGTATTAAGACTACCTGCGGGTAAGAACGGCGGGCGTATATTCTTTCTTTCTAGTTAATAAGAAAAACATCTAACATAAATATATAAACGCAAACA	5.36017
HHT1_59to88_30snps_1	Randomly_Mutated_Window	GAAATACATATATAAAAGACTGTGTATTCTTCGGGATACATCTCTTTCCTCAACCTTTATAGAGTCGAGCAGTCTTAATGGCTATTGTACATCTAACATAAATATATAAACGCAAACA	8.23686
HHT1_59to88_30snps_2	Randomly_Mutated_Window	GAAATACATATATAAAAGACTGTGTATTCTTCGGGATACATCTCTTTCCTCAACCTTTGGGCCAACAAACCCGCCAGGTGGGTAGCGCACATCTAACATAAATATATAAACGCAAACA	7.64037
HHT1_89to118_30snps_1	Randomly_Mutated_Window	GAAATACATATATAAAAGACTGTGTATTCTTCGGGATACATCTCTTTCCTCAACCTTTTATATTCTTTCTTTCTAGTTAATAAGAAAACTCAGGCGTGATTCCCCCCTGTTTAGCTTT	21.9594
HHT1_89to118_30snps_2	Randomly_Mutated_Window	GAAATACATATATAAAAGACTGTGTATTCTTCGGGATACATCTCTTTCCTCAACCTTTTATATTCTTTCTTTCTAGTTAATAAGAAAATGTGAACTTTACGCGTGCGGGCACAGTTAG	9.43365
ADH2_1to28_30snps_1	Randomly_Mutated_Window	TATAGTAACTCAACGCGACAAAACACCAATCACTTCTTGTTTCTTCTTGGTAAATAGAATATCAAGCTACAAAAAGCATACAATCAACTATCAACTATTAACTATATCGTAATACACA	7.32057
ADH2_1to28_30snps_2	Randomly_Mutated_Window	AAAAAGGCCTGTGGTGAGCCAACAACCAATCACTTCTTGTTTCTTCTTGGTAAATAGAATATCAAGCTACAAAAAGCATACAATCAACTATCAACTATTAACTATATCGTAATACACA	6.70915
ADH2_29to58_30snps_1	Randomly_Mutated_Window	CTCTTACTACTGCTCTCTTGTTGTTTTTGAGCGACAGCAGAAGGGGGCAAGGTGATCCATATCAAGCTACAAAAAGCATACAATCAACTATCAACTATTAACTATATCGTAATACACA	6.48322
ADH2_29to58_30snps_2	Randomly_Mutated_Window	CTCTTACTACTGCTCTCTTGTTGTTTTTGCTCAAATACTAGAGGGACGCCCTCTCGAGATATCAAGCTACAAAAAGCATACAATCAACTATCAACTATTAACTATATCGTAATACACA	NaN
ADH2_59to88_30snps_1	Randomly_Mutated_Window	CTCTTACTACTGCTCTCTTGTTGTTTTTATCACTTCTTGTTTCTTCTTGGTAAATAGACGTAGCCATACTTCGGCCTTCGTGTCGGCTTATCAACTATTAACTATATCGTAATACACA	3.54467
ADH2_59to88_30snps_2	Randomly_Mutated_Window	CTCTTACTACTGCTCTCTTGTTGTTTTTATCACTTCTTGTTTCTTCTTGGTAAATAGACCGCACCCAGCTGTGGGAAGCTATTCGCCGTATCAACTATTAACTATATCGTAATACACA	4.08309
ADH2_89to118_30snps_1	Randomly_Mutated_Window	CTCTTACTACTGCTCTCTTGTTGTTTTTATCACTTCTTGTTTCTTCTTGGTAAATAGAATATCAAGCTACAAAAAGCATACAATCAACACGACCTCGACGTGCCCGATTAGCGTGCAC	6.72174
ADH2_89to118_30snps_2	Randomly_Mutated_Window	CTCTTACTACTGCTCTCTTGTTGTTTTTATCACTTCTTGTTTCTTCTTGGTAAATAGAATATCAAGCTACAAAAAGCATACAATCAACCTCATTGCCCAGGGAGCCATTCCCCGATGT	NaN
RPS20_1to28_30snps_1	Randomly_Mutated_Window	CATCCTTCGTTCGCGCGTGGGTGCTCTGTAGTAAAGATGGGTTATTTCATTCAAGCTCAGCTTTAGATTGAAACTCCTACAAGAAAGCAAGTAAAATAAACAAAAAGGTATATACAAA	6.37356
RPS20_1to28_30snps_2	Randomly_Mutated_Window	TCGCCTCCGTCAGGCAGTGAGTTGGCTGTAGTAAAGATGGGTTATTTCATTCAAGCTCAGCTTTAGATTGAAACTCCTACAAGAAAGCAAGTAAAATAAACAAAAAGGTATATACAAA	5.36871
RPS20_29to58_30snps_1	Randomly_Mutated_Window	GTAATAGACCGTATTGAATTCAAAATAAAGTAGCTCGCCTCCGCAGCACAGTTTAGAGAGCTTTAGATTGAAACTCCTACAAGAAAGCAAGTAAAATAAACAAAAAGGTATATACAAA	5.43807
RPS20_29to58_30snps_2	Randomly_Mutated_Window	GTAATAGACCGTATTGAATTCAAAATAAGTACTCTTCGTCACGTGAGGCCAGTTCGGGAGCTTTAGATTGAAACTCCTACAAGAAAGCAAGTAAAATAAACAAAAAGGTATATACAAA	3.22875
RPS20_59to88_30snps_1	Randomly_Mutated_Window	GTAATAGACCGTATTGAATTCAAAATAATAGTAAAGATGGGTTATTTCATTCAAGCTCCATGCGGAGAGTTGGTAGTAGGTGCCCTCGAAGTAAAATAAACAAAAAGGTATATACAAA	4.44702
RPS20_59to88_30snps_2	Randomly_Mutated_Window	GTAATAGACCGTATTGAATTCAAAATAATAGTAAAGATGGGTTATTTCATTCAAGCTCGTAAGACCTCAACCGTAAAAGTCCTGCGTTAAGTAAAATAAACAAAAAGGTATATACAAA	3.61753
RPS20_89to118_30snps_1	Randomly_Mutated_Window	GTAATAGACCGTATTGAATTCAAAATAATAGTAAAGATGGGTTATTTCATTCAAGCTCAGCTTTAGATTGAAACTCCTACAAGAAAGCTCAACTGGCCTCGTGTTTCTACACCTAGCC	4.82631
RPS20_89to118_30snps_2	Randomly_Mutated_Window	GTAATAGACCGTATTGAATTCAAAATAATAGTAAAGATGGGTTATTTCATTCAAGCTCAGCTTTAGATTGAAACTCCTACAAGAAAGCTTAAGGGTCCTTGTGCGCTCGCATATACTT	6.31129
RPS3_1to28_30snps_1	Randomly_Mutated_Window	CCGTTGCGCGGGAGTCGGGATGGTTTGCTTAAGCAATTTCTAGTTTGTAGATATTGTTAGATTAGTTTTTGAACATTGTTTTGATAACTGAAAATAAAACAGCAAACAAACTACAAAA	7.45464
RPS3_1to28_30snps_2	Randomly_Mutated_Window	AATGGACATTTCAGGGCAGAGTCTACAGTTAAGCAATTTCTAGTTTGTAGATATTGTTAGATTAGTTTTTGAACATTGTTTTGATAACTGAAAATAAAACAGCAAACAAACTACAAAA	8.62694
RPS3_29to58_30snps_1	Randomly_Mutated_Window	TGAAATACAACAGCATTTTTCATACATTAGTGCGTCCGAAGCAGCACGTTGCTCCACGAGATTAGTTTTTGAACATTGTTTTGATAACTGAAAATAAAACAGCAAACAAACTACAAAA	8.11537
RPS3_29to58_30snps_2	Randomly_Mutated_Window	TGAAATACAACAGCATTTTTCATACATTACCTCAGGCGGAACCGCGTAGTGACGGCAAAGATTAGTTTTTGAACATTGTTTTGATAACTGAAAATAAAACAGCAAACAAACTACAAAA	5.82209
RPS3_59to88_30snps_1	Randomly_Mutated_Window	TGAAATACAACAGCATTTTTCATACATTTTAAGCAATTTCTAGTTTGTAGATATTGTTGATAATTGACGATGCATGGTCAGCTCATCATGAAAATAAAACAGCAAACAAACTACAAAA	3.30345
RPS3_59to88_30snps_2	Randomly_Mutated_Window	TGAAATACAACAGCATTTTTCATACATTTTAAGCAATTTCTAGTTTGTAGATATTGTTGCGCGTTGCCGACGGAGAACAAAGATGCTATGAAAATAAAACAGCAAACAAACTACAAAA	NaN
RPS3_89to118_30snps_1	Randomly_Mutated_Window	TGAAATACAACAGCATTTTTCATACATTTTAAGCAATTTCTAGTTTGTAGATATTGTTAGATTAGTTTTTGAACATTGTTTTGATAACCATTTTGTGGTATTATCTAGGCGGTGTCCT	6.83871
RPS3_89to118_30snps_2	Randomly_Mutated_Window	TGAAATACAACAGCATTTTTCATACATTTTAAGCAATTTCTAGTTTGTAGATATTGTTAGATTAGTTTTTGAACATTGTTTTGATAACGTGTCGGGTGTTGAGCTGGCTTTAGGCGCG	5.60765
RPL41B_1to28_30snps_1	Randomly_Mutated_Window	CCGTTATCGAAGATCGATGTGCCTCATGTTCACTTCTCTCTTTGAAATTTCGCTTGTTTTCTGTTTTCATCTTATATTTTACTTCAATCCTAAGATAGTCATATCGACTTAATTCCAA	6.27417
RPL41B_1to28_30snps_2	Randomly_Mutated_Window	CGTGCGTGGACGGGAGTCGGTCAGCCTGTTCACTTCTCTCTTTGAAATTTCGCTTGTTTTCTGTTTTCATCTTATATTTTACTTCAATCCTAAGATAGTCATATCGACTTAATTCCAA	4.79667
RPL41B_29to58_30snps_1	Randomly_Mutated_Window	TTAAATAATTGTTATCCGTCATTATTGTCCGGGACTGGCAAGACGCCACAATTCCCGATTCTGTTTTCATCTTATATTTTACTTCAATCCTAAGATAGTCATATCGACTTAATTCCAA	5.04354
RPL41B_29to58_30snps_2	Randomly_Mutated_Window	TTAAATAATTGTTATCCGTCATTATTGTCGGCGCCAGAAGAGCTGTTCACTCAGGCGATTCTGTTTTCATCTTATATTTTACTTCAATCCTAAGATAGTCATATCGACTTAATTCCAA	5.94123
RPL41B_59to88_30snps_1	Randomly_Mutated_Window	TTAAATAATTGTTATCCGTCATTATTGTTTCACTTCTCTCTTTGAAATTTCGCTTGTTCCAAACAGGGGCTCCGGTAGCGCAGAATGACCTAAGATAGTCATATCGACTTAATTCCAA	2.27127
RPL41B_59to88_30snps_2	Randomly_Mutated_Window	TTAAATAATTGTTATCCGTCATTATTGTTTCACTTCTCTCTTTGAAATTTCGCTTGTTGAAGCCGGGGTAACACCTGCAGGTAAGGCCCCTAAGATAGTCATATCGACTTAATTCCAA	NaN
RPL41B_89to118_30snps_1	Randomly_Mutated_Window	TTAAATAATTGTTATCCGTCATTATTGTTTCACTTCTCTCTTTGAAATTTCGCTTGTTTTCTGTTTTCATCTTATATTTTACTTCAATGGACGACGTCGGTCTCGCCTCATCCAATCT	4.80998
RPL41B_89to118_30snps_2	Randomly_Mutated_Window	TTAAATAATTGTTATCCGTCATTATTGTTTCACTTCTCTCTTTGAAATTTCGCTTGTTTTCTGTTTTCATCTTATATTTTACTTCAATGTCGCAGGTTAACCGAATCACGCGGAGGGT	6.76875
EFB1_1to28_30snps_1	Randomly_Mutated_Window	TTGGTCTCCATGCTCCGGCAACAAGTAGTCTTTTTTTTTTCCTTCTACTCTTTATCTTTTTACCTCATGCTTTCTACCTTTCAGCACTGAAGAGTCCAACCGAATATATACACACATA	5.69945
EFB1_1to28_30snps_2	Randomly_Mutated_Window	TTACCAAGTGAGGACCCGGGGTAGCCAATCTTTTTTTTTTCCTTCTACTCTTTATCTTTTTACCTCATGCTTTCTACCTTTCAGCACTGAAGAGTCCAACCGAATATATACACACATA	NaN
EFB1_29to58_30snps_1	Randomly_Mutated_Window	GGTTATCTACCCACTATATTTAGTTGGTGGCAAGGGGACGATGGACCTCTGCCCATCATTTACCTCATGCTTTCTACCTTTCAGCACTGAAGAGTCCAACCGAATATATACACACATA	4.42266
EFB1_29to58_30snps_2	Randomly_Mutated_Window	GGTTATCTACCCACTATATTTAGTTGGTCAAACCGGAGCCGGCATCCTATGCCCGACGTTTACCTCATGCTTTCTACCTTTCAGCACTGAAGAGTCCAACCGAATATATACACACATA	3.1138
EFB1_59to88_30snps_1	Randomly_Mutated_Window	GGTTATCTACCCACTATATTTAGTTGGTTCTTTTTTTTTTCCTTCTACTCTTTATCTTGAGTAGCGTGAACAGACGTGACGGGTGGACGAAGAGTCCAACCGAATATATACACACATA	2.58252
EFB1_59to88_30snps_2	Randomly_Mutated_Window	GGTTATCTACCCACTATATTTAGTTGGTTCTTTTTTTTTTCCTTCTACTCTTTATCTTAAACATAATCAACGGGGGAGAACGGTGCAAGAAGAGTCCAACCGAATATATACACACATA	8.51582
EFB1_89to118_30snps_1	Randomly_Mutated_Window	GGTTATCTACCCACTATATTTAGTTGGTTCTTTTTTTTTTCCTTCTACTCTTTATCTTTTTACCTCATGCTTTCTACCTTTCAGCACTTTTTTTGAACCGACCTATACGCAGGGAGGT	6.68705
EFB1_89to118_30snps_2	Randomly_Mutated_Window	GGTTATCTACCCACTATATTTAGTTGGTTCTTTTTTTTTTCCTTCTACTCTTTATCTTTTTACCTCATGCTTTCTACCTTTCAGCACTCGTCGACGACGAATCCGTCCGCTTTTTTGC	2.3189
RPL39_1to28_30snps_1	Randomly_Mutated_Window	AAGGACATCGTCGCCCACAACCCGTCAGTCTACTTAATATACTTTCTACAATTTTTGGTACATTCATATTATACTGAAAATTCGAAAAAGACAAGCAAATAAACACAGATAGATCAAC	NaN
RPL39_1to28_30snps_2	Randomly_Mutated_Window	AACAGTTTCACGGCTGATAGAATCCTGATCTACTTAATATACTTTCTACAATTTTTGGTACATTCATATTATACTGAAAATTCGAAAAAGACAAGCAAATAAACACAGATAGATCAAC	6.0724
RPL39_29to58_30snps_1	Randomly_Mutated_Window	TCTTCGCCTTGATAGATACTTTAAAACTGGCTAGACGCGCGAGCCAAGTCGGCCAGTATACATTCATATTATACTGAAAATTCGAAAAAGACAAGCAAATAAACACAGATAGATCAAC	NaN
RPL39_29to58_30snps_2	Randomly_Mutated_Window	TCTTCGCCTTGATAGATACTTTAAAACTCTCGTAGGGCGCTTAAAGACGTGAGAACCATACATTCATATTATACTGAAAATTCGAAAAAGACAAGCAAATAAACACAGATAGATCAAC	6.28981
RPL39_59to88_30snps_1	Randomly_Mutated_Window	TCTTCGCCTTGATAGATACTTTAAAACTTCTACTTAATATACTTTCTACAATTTTTGGGTATCGACGCACGGTTCATCGGAGTTCCTGAGACAAGCAAATAAACACAGATAGATCAAC	NaN
RPL39_59to88_30snps_2	Randomly_Mutated_Window	TCTTCGCCTTGATAGATACTTTAAAACTTCTACTTAATATACTTTCTACAATTTTTGGCTTCGGGTCGAGTATACACGCCGAGCCTTTAGACAAGCAAATAAACACAGATAGATCAAC	7.02389
RPL39_89to118_30snps_1	Randomly_Mutated_Window	TCTTCGCCTTGATAGATACTTTAAAACTTCTACTTAATATACTTTCTACAATTTTTGGTACATTCATATTATACTGAAAATTCGAAAAGTGATTAACTTATCGACGGCCCGTGGGGCG	1.34835
RPL39_89to118_30snps_2	Randomly_Mutated_Window	TCTTCGCCTTGATAGATACTTTAAAACTTCTACTTAATATACTTTCTACAATTTTTGGTACATTCATATTATACTGAAAATTCGAAAAGTCGGCAAGGGGCGTTCAGCTCGTCGTGCT	4.26112
PSA1_1to28_30snps_1	Randomly_Mutated_Window	GTGACGTTTGCTTGGGCTGACCAGGCCTTGTCCAAATATTTTGTTGACTATACAAACAAAATATTATCAGCACAAGACAAGCTACAACTTCAACAAATAAAACATATATAATTGAAAA	6.08262
PSA1_1to28_30snps_2	Randomly_Mutated_Window	ATTACCTAGGCTATGCGAGGAACGGGCATGTCCAAATATTTTGTTGACTATACAAACAAAATATTATCAGCACAAGACAAGCTACAACTTCAACAAATAAAACATATATAATTGAAAA	5.54057
PSA1_29to58_30snps_1	Randomly_Mutated_Window	TACTTTACATTCGCTAACTCTTTTCTTCACGGGCCGGGCAACTCCCTACGGCAGCGGGAAATATTATCAGCACAAGACAAGCTACAACTTCAACAAATAAAACATATATAATTGAAAA	2.3189
PSA1_29to58_30snps_2	Randomly_Mutated_Window	TACTTTACATTCGCTAACTCTTTTCTTCGTAATCGTACACCGAGACGTCGACGGGGTCAAATATTATCAGCACAAGACAAGCTACAACTTCAACAAATAAAACATATATAATTGAAAA	3.79298
PSA1_59to88_30snps_1	Randomly_Mutated_Window	TACTTTACATTCGCTAACTCTTTTCTTCTGTCCAAATATTTTGTTGACTATACAAACACCGGGCAGCGTCATTCGCGTGCTAGCGGCGTTCAACAAATAAAACATATATAATTGAAAA	1.57636
PSA1_59to88_30snps_2	Randomly_Mutated_Window	TACTTTACATTCGCTAACTCTTTTCTTCTGTCCAAATATTTTGTTGACTATACAAACATCCCTGATCGCAGCGGCACGGGCGATTCGGTTCAACAAATAAAACATATATAATTGAAAA	3.09594
PSA1_89to118_30snps_1	Randomly_Mutated_Window	TACTTTACATTCGCTAACTCTTTTCTTCTGTCCAAATATTTTGTTGACTATACAAACAAAATATTATCAGCACAAGACAAGCTACAACGCGTGATGGAGCTGTGCTGGGCGAACGCCG	NaN
PSA1_89to118_30snps_2	Randomly_Mutated_Window	TACTTTACATTCGCTAACTCTTTTCTTCTGTCCAAATATTTTGTTGACTATACAAACAAAATATTATCAGCACAAGACAAGCTACAACGGGCCTGCTCTCGTACCTCTATCGGTGCCG	5.88513
CIT2_1to28_30snps_1	Randomly_Mutated_Window	CTCCTTACTGCGTCGAGGCAGCAAACGCCCTCATTATTAAGTTTCAGGGAACAATATCAACACATATCATAACAGGTTCTCAAAACTTTTTGTTTTAATAATACTAGTAACAAGAAAA	NaN
CIT2_1to28_30snps_2	Randomly_Mutated_Window	CTGGCCAGGGGAGATCGATTGCGGGTGACCTCATTATTAAGTTTCAGGGAACAATATCAACACATATCATAACAGGTTCTCAAAACTTTTTGTTTTAATAATACTAGTAACAAGAAAA	4.72161
CIT2_29to58_30snps_1	Randomly_Mutated_Window	ACTTGGTTCTTTAGATATGGTGTTCGTTGAGGGCGGGGTTTACCACTTCTTGTGCGAAAACACATATCATAACAGGTTCTCAAAACTTTTTGTTTTAATAATACTAGTAACAAGAAAA	7.09799
CIT2_29to58_30snps_2	Randomly_Mutated_Window	ACTTGGTTCTTTAGATATGGTGTTCGTTGACGGCACACGGAACGGTTCTTTAGCGCCGAACACATATCATAACAGGTTCTCAAAACTTTTTGTTTTAATAATACTAGTAACAAGAAAA	6.97579
CIT2_59to88_30snps_1	Randomly_Mutated_Window	ACTTGGTTCTTTAGATATGGTGTTCGTTCCTCATTATTAAGTTTCAGGGAACAATATCCCGGGGACAGGGGGTGCTCCGGGCTGTAACTTTGTTTTAATAATACTAGTAACAAGAAAA	4.14843
CIT2_59to88_30snps_2	Randomly_Mutated_Window	ACTTGGTTCTTTAGATATGGTGTTCGTTCCTCATTATTAAGTTTCAGGGAACAATATCTTTCGGCCCTGGTTATACGGAGATTGTTAATTTGTTTTAATAATACTAGTAACAAGAAAA	NaN
CIT2_89to118_30snps_1	Randomly_Mutated_Window	ACTTGGTTCTTTAGATATGGTGTTCGTTCCTCATTATTAAGTTTCAGGGAACAATATCAACACATATCATAACAGGTTCTCAAAACTTAAGTACCGTGGTGATGCTCGTCTCGTTGCC	NaN
CIT2_89to118_30snps_2	Randomly_Mutated_Window	ACTTGGTTCTTTAGATATGGTGTTCGTTCCTCATTATTAAGTTTCAGGGAACAATATCAACACATATCATAACAGGTTCTCAAAACTTCACACCGGTCAGCGCTAGTGTCGCCTGTGT	7.3261
RPL18A_1to28_30snps_1	Randomly_Mutated_Window	GAGGAAAGGTGGGTATCCATGCTACGTCGATAATTTAAAACAAATTGAGTTGAAGATTCATCAATTCTGCCATTTTGGATCCATCACAAGAAGAGATCATCAAGCTTACGGATTCACA	7.98958
RPL18A_1to28_30snps_2	Randomly_Mutated_Window	GAGGTCACAAGTCGAAGCATAGAATGCGGATAATTTAAAACAAATTGAGTTGAAGATTCATCAATTCTGCCATTTTGGATCCATCACAAGAAGAGATCATCAAGCTTACGGATTCACA	8.12216
RPL18A_29to58_30snps_1	Randomly_Mutated_Window	TTCTGGTTCCTCAAGGAATATTGTATGAAGATCCGCGCCGACCGGGATCGGCGCTCGGCATCAATTCTGCCATTTTGGATCCATCACAAGAAGAGATCATCAAGCTTACGGATTCACA	1.60173
RPL18A_29to58_30snps_2	Randomly_Mutated_Window	TTCTGGTTCCTCAAGGAATATTGTATGATGGTTAGATGCGGGGCAACTAAATGCCGCCCATCAATTCTGCCATTTTGGATCCATCACAAGAAGAGATCATCAAGCTTACGGATTCACA	NaN
RPL18A_59to88_30snps_1	Randomly_Mutated_Window	TTCTGGTTCCTCAAGGAATATTGTATGAGATAATTTAAAACAAATTGAGTTGAAGATTTTGGGCCAGACTAGGGAAAAGCTACGTGACAGAAGAGATCATCAAGCTTACGGATTCACA	NaN
RPL18A_59to88_30snps_2	Randomly_Mutated_Window	TTCTGGTTCCTCAAGGAATATTGTATGAGATAATTTAAAACAAATTGAGTTGAAGATTTGATCCGATACTTTCGAAATGGAAGGACAGAGAAGAGATCATCAAGCTTACGGATTCACA	5.86824
RPL18A_89to118_30snps_1	Randomly_Mutated_Window	TTCTGGTTCCTCAAGGAATATTGTATGAGATAATTTAAAACAAATTGAGTTGAAGATTCATCAATTCTGCCATTTTGGATCCATCACAGTGTCCTCGGTGTTCTACGTATATACTGAC	6.89971
RPL18A_89to118_30snps_2	Randomly_Mutated_Window	TTCTGGTTCCTCAAGGAATATTGTATGAGATAATTTAAAACAAATTGAGTTGAAGATTCATCAATTCTGCCATTTTGGATCCATCACACACGTGTCCACGGCGCACCGTTTTAAACTG	4.78281
RPS0A_1to28_30snps_1	Randomly_Mutated_Window	TGCTTAAGCTGTTATGAAACCCGCCGTGATCGAAATGTAGCATTGTTAGTTTACTTCGTAAACTGCCCTTGTAGAGTGAGGTATAGCTTAGAAAATAGCAAACTAAATAGAGAGCGAA	5.76645
RPS0A_1to28_30snps_2	Randomly_Mutated_Window	AGGTAGCGTCTTTCATCTTACCCGGCCCATCGAAATGTAGCATTGTTAGTTTACTTCGTAAACTGCCCTTGTAGAGTGAGGTATAGCTTAGAAAATAGCAAACTAAATAGAGAGCGAA	1.12429
RPS0A_29to58_30snps_1	Randomly_Mutated_Window	GATCCCGTAGCAAGGATGCTTATAATATCGTTGCTCTATAAGCCCGGCAAAACTACGCTAAACTGCCCTTGTAGAGTGAGGTATAGCTTAGAAAATAGCAAACTAAATAGAGAGCGAA	4.86913
RPS0A_29to58_30snps_2	Randomly_Mutated_Window	GATCCCGTAGCAAGGATGCTTATAATATCCAAGTGGTCTTATCCAAGGCGGCTGACAATAAACTGCCCTTGTAGAGTGAGGTATAGCTTAGAAAATAGCAAACTAAATAGAGAGCGAA	4.38701
RPS0A_59to88_30snps_1	Randomly_Mutated_Window	GATCCCGTAGCAAGGATGCTTATAATATATCGAAATGTAGCATTGTTAGTTTACTTCGACGGTAAAGAAGTGGACAGCGTCGTATAGATAGAAAATAGCAAACTAAATAGAGAGCGAA	5.28709
RPS0A_59to88_30snps_2	Randomly_Mutated_Window	GATCCCGTAGCAAGGATGCTTATAATATATCGAAATGTAGCATTGTTAGTTTACTTCGATCCAGTGTGGATAGCTTGCTTACCGCCTCTAGAAAATAGCAAACTAAATAGAGAGCGAA	6.35478
RPS0A_89to118_30snps_1	Randomly_Mutated_Window	GATCCCGTAGCAAGGATGCTTATAATATATCGAAATGTAGCATTGTTAGTTTACTTCGTAAACTGCCCTTGTAGAGTGAGGTATAGCTGCAGTTGATCATGGGAGGGGCTTATAGACG	NaN
RPS0A_89to118_30snps_2	Randomly_Mutated_Window	GATCCCGTAGCAAGGATGCTTATAATATATCGAAATGTAGCATTGTTAGTTTACTTCGTAAACTGCCCTTGTAGAGTGAGGTATAGCTGCTCCGGATAATGGGGGTCACTCTTAGTTC	NaN
RPL30_1to28_30snps_1	Randomly_Mutated_Window	GTCCCGAACTAGGACGCATGCTACTCCAATACTTACTCCTTGCTCTTTTATAATATAACCAAACAGACCGGAGTGTTTAAGAACCTACAGCTTATTCAATTAATCAATATACGCAGAG	7.88921
RPL30_1to28_30snps_2	Randomly_Mutated_Window	AACAAGAGCCCCTACCGATGCGGGTGACATACTTACTCCTTGCTCTTTTATAATATAACCAAACAGACCGGAGTGTTTAAGAACCTACAGCTTATTCAATTAATCAATATACGCAGAG	4.6491
RPL30_29to58_30snps_1	Randomly_Mutated_Window	CCATTTGTTGGAATGTTCATTACAGTTTTCCTGACAGGAGCAGGTAAAGCCGGACCCTCCAAACAGACCGGAGTGTTTAAGAACCTACAGCTTATTCAATTAATCAATATACGCAGAG	4.19855
RPL30_29to58_30snps_2	Randomly_Mutated_Window	CCATTTGTTGGAATGTTCATTACAGTTTGCCACACAGAAAAATCTACGACAGGACACTCCAAACAGACCGGAGTGTTTAAGAACCTACAGCTTATTCAATTAATCAATATACGCAGAG	5.31146
RPL30_59to88_30snps_1	Randomly_Mutated_Window	CCATTTGTTGGAATGTTCATTACAGTTTATACTTACTCCTTGCTCTTTTATAATATAATGGTTACCGGTCACTCCAAGTTTCTATCCTAGCTTATTCAATTAATCAATATACGCAGAG	7.37114
RPL30_59to88_30snps_2	Randomly_Mutated_Window	CCATTTGTTGGAATGTTCATTACAGTTTATACTTACTCCTTGCTCTTTTATAATATAATTGCTGCCTTTTCTACCCAGGTTGCTGCCAAGCTTATTCAATTAATCAATATACGCAGAG	NaN
RPL30_89to118_30snps_1	Randomly_Mutated_Window	CCATTTGTTGGAATGTTCATTACAGTTTATACTTACTCCTTGCTCTTTTATAATATAACCAAACAGACCGGAGTGTTTAAGAACCTACTTAACCACGGGAGCCGTTTCTGTTATTTTA	NaN
RPL30_89to118_30snps_2	Randomly_Mutated_Window	CCATTTGTTGGAATGTTCATTACAGTTTATACTTACTCCTTGCTCTTTTATAATATAACCAAACAGACCGGAGTGTTTAAGAACCTACGAAACCGCAGCACGCCGGCGGACGCTTACT	4.71854
HHF1_1to28_30snps_1	Randomly_Mutated_Window	GGTCGCGAGACGCGTCATTGCCTCAGGCTTTTCTATATGATGGTTTCCGTCGCATTATTGTACTCTATAGTACTAAAGCAACAAACAAAAACAAGCAACAAATATAATATAGTAAAAT	NaN
HHF1_1to28_30snps_2	Randomly_Mutated_Window	AGTGGGCGAGATGCTTGTATTGAGGTACTTTTCTATATGATGGTTTCCGTCGCATTATTGTACTCTATAGTACTAAAGCAACAAACAAAAACAAGCAACAAATATAATATAGTAAAAT	6.55404
HHF1_29to58_30snps_1	Randomly_Mutated_Window	TTCTTTTTCCTATAAATACCGAGATATTAACGTACAGGAGCAAAGAGAAGGAAGCATGTGTACTCTATAGTACTAAAGCAACAAACAAAAACAAGCAACAAATATAATATAGTAAAAT	NaN
HHF1_29to58_30snps_2	Randomly_Mutated_Window	TTCTTTTTCCTATAAATACCGAGATATTAGGGTAGCGAAGAAAGAATAAGTAGCGCTCTGTACTCTATAGTACTAAAGCAACAAACAAAAACAAGCAACAAATATAATATAGTAAAAT	17.5247
HHF1_59to88_30snps_1	Randomly_Mutated_Window	TTCTTTTTCCTATAAATACCGAGATATTTTTTCTATATGATGGTTTCCGTCGCATTATCTGTGCACCGTAATGGCTTATTCGCTTAGTAAACAAGCAACAAATATAATATAGTAAAAT	NaN
HHF1_59to88_30snps_2	Randomly_Mutated_Window	TTCTTTTTCCTATAAATACCGAGATATTTTTTCTATATGATGGTTTCCGTCGCATTATCAAGACTGGCGACTTCTTCCATCGTTCGCTAAACAAGCAACAAATATAATATAGTAAAAT	17.6013
HHF1_89to118_30snps_1	Randomly_Mutated_Window	TTCTTTTTCCTATAAATACCGAGATATTTTTTCTATATGATGGTTTCCGTCGCATTATTGTACTCTATAGTACTAAAGCAACAAACAAGGCACCATGGAGCTAGGGGCCGTTGTTTTC	NaN
HHF1_89to118_30snps_2	Randomly_Mutated_Window	TTCTTTTTCCTATAAATACCGAGATATTTTTTCTATATGATGGTTTCCGTCGCATTATTGTACTCTATAGTACTAAAGCAACAAACAATGTGCCAAGGATCCGCCTCGGGGCAGTTGC	NaN
RPP1B_1to28_30snps_1	Randomly_Mutated_Window	ATGGGGCGATGACAAGCAAATGGCAGCGAAGCCCCTTCGTGATATTTCAAGGTTAAATTACGAATTGCAGTTTCAGTTAATCTTGGACTAACAAAGAAATCAAACAACTAAGAAGAAA	NaN
RPP1B_1to28_30snps_2	Randomly_Mutated_Window	GAGGGCTTTATGAGCCCTCACTGGTCCAAAGCCCCTTCGTGATATTTCAAGGTTAAATTACGAATTGCAGTTTCAGTTAATCTTGGACTAACAAAGAAATCAAACAACTAAGAAGAAA	8.46754
RPP1B_29to58_30snps_1	Randomly_Mutated_Window	CCAAATAAGCATTTGATGTTGAATCTGTTCCGAGTGCGTGAGAGAAAGCTACAAGGCGTACGAATTGCAGTTTCAGTTAATCTTGGACTAACAAAGAAATCAAACAACTAAGAAGAAA	8.58362
RPP1B_29to58_30snps_2	Randomly_Mutated_Window	CCAAATAAGCATTTGATGTTGAATCTGTTGATGAAAAGTAATCCCAGTCGTTGGTGCCTACGAATTGCAGTTTCAGTTAATCTTGGACTAACAAAGAAATCAAACAACTAAGAAGAAA	NaN
RPP1B_59to88_30snps_1	Randomly_Mutated_Window	CCAAATAAGCATTTGATGTTGAATCTGTAAGCCCCTTCGTGATATTTCAAGGTTAAATGTGATTCAAGCAAGGTTAGCGTATAGATCGTAACAAAGAAATCAAACAACTAAGAAGAAA	NaN
RPP1B_59to88_30snps_2	Randomly_Mutated_Window	CCAAATAAGCATTTGATGTTGAATCTGTAAGCCCCTTCGTGATATTTCAAGGTTAAATGGTTGGACCTTACCCGCTGCCCCAAACTCATAACAAAGAAATCAAACAACTAAGAAGAAA	5.4404
RPP1B_89to118_30snps_1	Randomly_Mutated_Window	CCAAATAAGCATTTGATGTTGAATCTGTAAGCCCCTTCGTGATATTTCAAGGTTAAATTACGAATTGCAGTTTCAGTTAATCTTGGACACTATTCCGCCAATGTTTGACTTTTGTTCG	NaN
RPP1B_89to118_30snps_2	Randomly_Mutated_Window	CCAAATAAGCATTTGATGTTGAATCTGTAAGCCCCTTCGTGATATTTCAAGGTTAAATTACGAATTGCAGTTTCAGTTAATCTTGGACCGTGGGCTGCGAGTGCTTTGCCTACGAGGG	3.57839
RPS5_1to28_30snps_1	Randomly_Mutated_Window	AGCAACGTCGAGCTAGCTGTGAGCGCCATTCATTTTGAATTAAAATTACTTTTTATTTTAATTACACTCCTTTCATAATACCAAGAAAAGAGACTAGAAATAACCGACCATTCCAAAG	NaN
RPS5_1to28_30snps_2	Randomly_Mutated_Window	AAGCAGGGGGGACTGAGGGCTCGCCCCCTTCATTTTGAATTAAAATTACTTTTTATTTTAATTACACTCCTTTCATAATACCAAGAAAAGAGACTAGAAATAACCGACCATTCCAAAG	7.67014
RPS5_29to58_30snps_1	Randomly_Mutated_Window	TTTTGTACTTTTTATCAATACTTAAAATCGAGAGAACGTCCTTCGCAGGCGACCGGGGTAATTACACTCCTTTCATAATACCAAGAAAAGAGACTAGAAATAACCGACCATTCCAAAG	6.51721
RPS5_29to58_30snps_2	Randomly_Mutated_Window	TTTTGTACTTTTTATCAATACTTAAAATCGTCGGGATCCCACTTTACCGGCGCGGGGCTAATTACACTCCTTTCATAATACCAAGAAAAGAGACTAGAAATAACCGACCATTCCAAAG	NaN
RPS5_59to88_30snps_1	Randomly_Mutated_Window	TTTTGTACTTTTTATCAATACTTAAAATTTCATTTTGAATTAAAATTACTTTTTATTTCGCAGTATGCTAGGGACCGTGTAACTTTCGAGAGACTAGAAATAACCGACCATTCCAAAG	10.605
RPS5_59to88_30snps_2	Randomly_Mutated_Window	TTTTGTACTTTTTATCAATACTTAAAATTTCATTTTGAATTAAAATTACTTTTTATTTCCGGACTCGCTAAAAGTACCCTGTTTTGGGAGAGACTAGAAATAACCGACCATTCCAAAG	9.41167
RPS5_89to118_30snps_1	Randomly_Mutated_Window	TTTTGTACTTTTTATCAATACTTAAAATTTCATTTTGAATTAAAATTACTTTTTATTTTAATTACACTCCTTTCATAATACCAAGAAATCGTCAAGATCGGTGGGTGGGCCCTGCTCA	7.55432
RPS5_89to118_30snps_2	Randomly_Mutated_Window	TTTTGTACTTTTTATCAATACTTAAAATTTCATTTTGAATTAAAATTACTTTTTATTTTAATTACACTCCTTTCATAATACCAAGAAACACCGGATATTGACTTTACGGGGCTACTGC	NaN
RPL22A_1to28_30snps_1	Randomly_Mutated_Window	CAGGAGCGTTCTGTTCGGTATCTGCAGGAATATGTACATTATTAATTGAGATTAACAACTTTACCTGTACTTTACCGTTATCAAATTATAAACCACCAAAACAACAGATTAAGAAACA	8.54777
RPL22A_1to28_30snps_2	Randomly_Mutated_Window	GCACGAGTTTGTCACGGGCAGACAGAGAAATATGTACATTATTAATTGAGATTAACAACTTTACCTGTACTTTACCGTTATCAAATTATAAACCACCAAAACAACAGATTAAGAAACA	8.39433
RPL22A_29to58_30snps_1	Randomly_Mutated_Window	TGTTTCAAACTATCATTTAGCTGCATACCCCCACCTGTCCCAAGCGGTCCGGATCTTGCTTTACCTGTACTTTACCGTTATCAAATTATAAACCACCAAAACAACAGATTAAGAAACA	4.69864
RPL22A_29to58_30snps_2	Randomly_Mutated_Window	TGTTTCAAACTATCATTTAGCTGCATACGCATGAACATGGCAATCAAACTTAATTATCCTTTACCTGTACTTTACCGTTATCAAATTATAAACCACCAAAACAACAGATTAAGAAACA	7.50411
RPL22A_59to88_30snps_1	Randomly_Mutated_Window	TGTTTCAAACTATCATTTAGCTGCATACAATATGTACATTATTAATTGAGATTAACAATACCTGAAAACAGAGTTAAAGCAGTGGCGTTAAACCACCAAAACAACAGATTAAGAAACA	7.13772
RPL22A_59to88_30snps_2	Randomly_Mutated_Window	TGTTTCAAACTATCATTTAGCTGCATACAATATGTACATTATTAATTGAGATTAACAATCAGCAGGAAGGACATATTCCTAGTCGACTTAAACCACCAAAACAACAGATTAAGAAACA	8.79667
RPL22A_89to118_30snps_1	Randomly_Mutated_Window	TGTTTCAAACTATCATTTAGCTGCATACAATATGTACATTATTAATTGAGATTAACAACTTTACCTGTACTTTACCGTTATCAAATTAGCGCATCTAGTTCTGGGCTGGCGGTTCTGT	6.70133
RPL22A_89to118_30snps_2	Randomly_Mutated_Window	TGTTTCAAACTATCATTTAGCTGCATACAATATGTACATTATTAATTGAGATTAACAACTTTACCTGTACTTTACCGTTATCAAATTAATTTAAGTACCCTATCGTTTGGCCCGCCGC	6.23259
RPS4A_1to28_30snps_1	Randomly_Mutated_Window	TGACAGCAGTTACCAGGACACTCGGCCGAAATTATACTATAATTTAATCTAGTGTTGAAATACTTTCTTATATAGCGATTTTTCTGCCCAAAACAAACCAAAGAATCAATACGCAAAG	NaN
RPS4A_1to28_30snps_2	Randomly_Mutated_Window	CCCGACACAAAATTCGAGCTAGGTACCCAAATTATACTATAATTTAATCTAGTGTTGAAATACTTTCTTATATAGCGATTTTTCTGCCCAAAACAAACCAAAGAATCAATACGCAAAG	8.16615
RPS4A_29to58_30snps_1	Randomly_Mutated_Window	GAGATTGTCGGCAATACTAGTATATTAATTGGGCCGGACGCGCGGCTGGAGTATCCACAATACTTTCTTATATAGCGATTTTTCTGCCCAAAACAAACCAAAGAATCAATACGCAAAG	4.35867
RPS4A_29to58_30snps_2	Randomly_Mutated_Window	GAGATTGTCGGCAATACTAGTATATTAAGGTGCCGTAGCGGCGCAGCCGATTACGAATAATACTTTCTTATATAGCGATTTTTCTGCCCAAAACAAACCAAAGAATCAATACGCAAAG	5.92539
RPS4A_59to88_30snps_1	Randomly_Mutated_Window	GAGATTGTCGGCAATACTAGTATATTAAAAATTATACTATAATTTAATCTAGTGTTGATTGCTCGAGGAGATCGAATGGGACAACAGTCAAAACAAACCAAAGAATCAATACGCAAAG	7.00809
RPS4A_59to88_30snps_2	Randomly_Mutated_Window	GAGATTGTCGGCAATACTAGTATATTAAAAATTATACTATAATTTAATCTAGTGTTGACTCTTGGGGGCCATGGCTAGCGGACGACAACAAAACAAACCAAAGAATCAATACGCAAAG	4.58847
RPS4A_89to118_30snps_1	Randomly_Mutated_Window	GAGATTGTCGGCAATACTAGTATATTAAAAATTATACTATAATTTAATCTAGTGTTGAAATACTTTCTTATATAGCGATTTTTCTGCCGCGGCTTGGGTGGCCCTGATTCGTTTTTTT	NaN
RPS4A_89to118_30snps_2	Randomly_Mutated_Window	GAGATTGTCGGCAATACTAGTATATTAAAAATTATACTATAATTTAATCTAGTGTTGAAATACTTTCTTATATAGCGATTTTTCTGCCGGCTTATCGAGCGCCGCGTTTATGCATGTT	NaN
RPL13B_1to28_30snps_1	Randomly_Mutated_Window	GATCTTTGCCAACCCCCCTACCAACTATTACTATGTAATTAGAGGTACTTGAAGTTAGAACATAATGTAACATTAATAGGAAATAATTTCGGAAAAGTAAAGCAGGAATCAAGTAACA	5.94658
RPL13B_1to28_30snps_2	Randomly_Mutated_Window	AGTAATGAGCTACTTCATGGACAGCTACTACTATGTAATTAGAGGTACTTGAAGTTAGAACATAATGTAACATTAATAGGAAATAATTTCGGAAAAGTAAAGCAGGAATCAAGTAACA	NaN
RPL13B_29to58_30snps_1	Randomly_Mutated_Window	TCCTCCATTGGGAAGTTACTTTCTTACAGCTGCGCCCGGACACATCGAGCCGGTAAGTAACATAATGTAACATTAATAGGAAATAATTTCGGAAAAGTAAAGCAGGAATCAAGTAACA	2.92029
RPL13B_29to58_30snps_2	Randomly_Mutated_Window	TCCTCCATTGGGAAGTTACTTTCTTACAGCACCGCGTGGCTTTTAATTACATCCCCGCAACATAATGTAACATTAATAGGAAATAATTTCGGAAAAGTAAAGCAGGAATCAAGTAACA	NaN
RPL13B_59to88_30snps_1	Randomly_Mutated_Window	TCCTCCATTGGGAAGTTACTTTCTTACATACTATGTAATTAGAGGTACTTGAAGTTAGTCGGCCCACATTTCGACGACTCGTTGGGAATCGGAAAAGTAAAGCAGGAATCAAGTAACA	7.5723
RPL13B_59to88_30snps_2	Randomly_Mutated_Window	TCCTCCATTGGGAAGTTACTTTCTTACATACTATGTAATTAGAGGTACTTGAAGTTAGGGTTGCTGCATGTTCAGGCCATCTGGCCAATCGGAAAAGTAAAGCAGGAATCAAGTAACA	5.67636
RPL13B_89to118_30snps_1	Randomly_Mutated_Window	TCCTCCATTGGGAAGTTACTTTCTTACATACTATGTAATTAGAGGTACTTGAAGTTAGAACATAATGTAACATTAATAGGAAATAATTCAATGGTTCGTGGAGCCACTGTCGACTGGT	NaN
RPL13B_89to118_30snps_2	Randomly_Mutated_Window	TCCTCCATTGGGAAGTTACTTTCTTACATACTATGTAATTAGAGGTACTTGAAGTTAGAACATAATGTAACATTAATAGGAAATAATTATAATTCCCACCCAGTTTCGGGTTTGTGTG	4.26791
RPL7A_1to28_30snps_1	Randomly_Mutated_Window	CCGGGAGGCGTTTGCCTCGTTGGCGCACAATATTGAAATAATCAAGACACTAGATCTGCCTTGTATTGTCTTCGGTTCATATAAATCCAAATAACCAACCAAGCAAATTAAGATCACA	NaN
RPL7A_1to28_30snps_2	Randomly_Mutated_Window	GCACTCACATGTTGAAACCTGAGAACCCAATATTGAAATAATCAAGACACTAGATCTGCCTTGTATTGTCTTCGGTTCATATAAATCCAAATAACCAACCAAGCAAATTAAGATCACA	8.26698
RPL7A_29to58_30snps_1	Randomly_Mutated_Window	ATCACTTTGACAACTTCATCCTTTCTGATCCCGGTTTCACCGATCTCGGTAGTCAAGTCCTTGTATTGTCTTCGGTTCATATAAATCCAAATAACCAACCAAGCAAATTAAGATCACA	6.7327
RPL7A_29to58_30snps_2	Randomly_Mutated_Window	ATCACTTTGACAACTTCATCCTTTCTGACGGGCGAGCTCCCGTCCATTGTGGATATGCCCTTGTATTGTCTTCGGTTCATATAAATCCAAATAACCAACCAAGCAAATTAAGATCACA	2.3189
RPL7A_59to88_30snps_1	Randomly_Mutated_Window	ATCACTTTGACAACTTCATCCTTTCTGAAATATTGAAATAATCAAGACACTAGATCTGTAGGTAGCGTCAGATTCGATTCTCGCTATTAAATAACCAACCAAGCAAATTAAGATCACA	9.82393
RPL7A_59to88_30snps_2	Randomly_Mutated_Window	ATCACTTTGACAACTTCATCCTTTCTGAAATATTGAAATAATCAAGACACTAGATCTGTTAGCGTCGAAGGATCTCCGCCTATTCGTTAAATAACCAACCAAGCAAATTAAGATCACA	9.12941
RPL7A_89to118_30snps_1	Randomly_Mutated_Window	ATCACTTTGACAACTTCATCCTTTCTGAAATATTGAAATAATCAAGACACTAGATCTGCCTTGTATTGTCTTCGGTTCATATAAATCCCCCGGTAGTGTGCTCGCCGGGTGCTCTTAT	4.94137
RPL7A_89to118_30snps_2	Randomly_Mutated_Window	ATCACTTTGACAACTTCATCCTTTCTGAAATATTGAAATAATCAAGACACTAGATCTGCCTTGTATTGTCTTCGGTTCATATAAATCCTGGCCGGGCCGTGCATGTTCACTTTGTCAG	NaN
RPL5_1to28_30snps_1	Randomly_Mutated_Window	GGTCGGTCGCTATGCTAGCACGGTCATCATCCGATGTAGTATATTTCAGAGGCCAACCTTTACTTTTGTTTTCTCCTACACTTCAAAATAAAAGACACCGTCACAAATCTCAGCAACA	7.83545
RPL5_1to28_30snps_2	Randomly_Mutated_Window	CGTCCACCGCTAGTCTCCCCCAGCCATGATCCGATGTAGTATATTTCAGAGGCCAACCTTTACTTTTGTTTTCTCCTACACTTCAAAATAAAAGACACCGTCACAAATCTCAGCAACA	7.86651
RPL5_29to58_30snps_1	Randomly_Mutated_Window	AAAAATAAATAGAAAAGTTTGTAGACATTGTATTAACCAATATAACGGTTAAGGGGTTTTTACTTTTGTTTTCTCCTACACTTCAAAATAAAAGACACCGTCACAAATCTCAGCAACA	8.20485
RPL5_29to58_30snps_2	Randomly_Mutated_Window	AAAAATAAATAGAAAAGTTTGTAGACATCGGGTTACGTCAGATAGCACTTCTAGGTGGTTTACTTTTGTTTTCTCCTACACTTCAAAATAAAAGACACCGTCACAAATCTCAGCAACA	NaN
RPL5_59to88_30snps_1	Randomly_Mutated_Window	AAAAATAAATAGAAAAGTTTGTAGACATATCCGATGTAGTATATTTCAGAGGCCAACCACGCTCCCCAAAGCAATTCGGGAAGTGGTTTAAAAGACACCGTCACAAATCTCAGCAACA	NaN
RPL5_59to88_30snps_2	Randomly_Mutated_Window	AAAAATAAATAGAAAAGTTTGTAGACATATCCGATGTAGTATATTTCAGAGGCCAACCGCAGTGCGGTAGGAGATACGATTACTGCTTTAAAAGACACCGTCACAAATCTCAGCAACA	5.8072
RPL5_89to118_30snps_1	Randomly_Mutated_Window	AAAAATAAATAGAAAAGTTTGTAGACATATCCGATGTAGTATATTTCAGAGGCCAACCTTTACTTTTGTTTTCTCCTACACTTCAAAAGTCCGAGTTATTCGGGTCTGGGGCTTGGTT	4.76877
RPL5_89to118_30snps_2	Randomly_Mutated_Window	AAAAATAAATAGAAAAGTTTGTAGACATATCCGATGTAGTATATTTCAGAGGCCAACCTTTACTTTTGTTTTCTCCTACACTTCAAAACGGTTTCAGTGCATGAGCCAACACATTTAG	NaN
RPS15_1to28_30snps_1	Randomly_Mutated_Window	AGACTGGCGCATGCGGTCGCCAAGGCCCATTTCATTTTTTTCTTATTTGTTAGTGCTTATCCTTACATTGTAGAATAAGACGAACTAGAAGTACACAACAAGATAATCACGACCGATC	NaN
RPS15_1to28_30snps_2	Randomly_Mutated_Window	CGCCCAAAGCAGCAGACCGGAGCACCTCATTTCATTTTTTTCTTATTTGTTAGTGCTTATCCTTACATTGTAGAATAAGACGAACTAGAAGTACACAACAAGATAATCACGACCGATC	NaN
RPS15_29to58_30snps_1	Randomly_Mutated_Window	TATGGTCTCTTCTTTTATTTGTTCTTGGGGAGGTGCGACCAAGGCACGTGATAGATGGATCCTTACATTGTAGAATAAGACGAACTAGAAGTACACAACAAGATAATCACGACCGATC	4.70463
RPS15_29to58_30snps_2	Randomly_Mutated_Window	TATGGTCTCTTCTTTTATTTGTTCTTGGCGCAATGGCGCGCTGGGGAATAAGTAAAAAATCCTTACATTGTAGAATAAGACGAACTAGAAGTACACAACAAGATAATCACGACCGATC	6.40221
RPS15_59to88_30snps_1	Randomly_Mutated_Window	TATGGTCTCTTCTTTTATTTGTTCTTGGATTTCATTTTTTTCTTATTTGTTAGTGCTTTGTGACCGGGGCCCAGTAGTAGGCGTGCGAAAGTACACAACAAGATAATCACGACCGATC	7.57235
RPS15_59to88_30snps_2	Randomly_Mutated_Window	TATGGTCTCTTCTTTTATTTGTTCTTGGATTTCATTTTTTTCTTATTTGTTAGTGCTTTATTAACACCCAAGCGTCTTTGATTCTCGTAAGTACACAACAAGATAATCACGACCGATC	8.84823
RPS15_89to118_30snps_1	Randomly_Mutated_Window	TATGGTCTCTTCTTTTATTTGTTCTTGGATTTCATTTTTTTCTTATTTGTTAGTGCTTATCCTTACATTGTAGAATAAGACGAACTAGTGTGTTGGCCGGGCGGGCCTCATTGACCCT	1.51832
RPS15_89to118_30snps_2	Randomly_Mutated_Window	TATGGTCTCTTCTTTTATTTGTTCTTGGATTTCATTTTTTTCTTATTTGTTAGTGCTTATCCTTACATTGTAGAATAAGACGAACTAGTCTGTTCATCTCGCCCGTCGGTTTAGCGCT	NaN
RPL33A_1to28_30snps_1	Randomly_Mutated_Window	CGTCGGGGATCGCATCCTAAGTGAAATTGTGTATTAATCACTAGTTCAAAACTTGAGTTATTTTGCCTTGAGCAATTGTAAGAATCCGTAAGAAACCAACAATCAAATAAATTGAAAA	8.21363
RPL33A_1to28_30snps_2	Randomly_Mutated_Window	GTGCGAAGAGGGAGCGCAAACGCGACCTGTGTATTAATCACTAGTTCAAAACTTGAGTTATTTTGCCTTGAGCAATTGTAAGAATCCGTAAGAAACCAACAATCAAATAAATTGAAAA	7.60178
RPL33A_29to58_30snps_1	Randomly_Mutated_Window	AAATATTCGCTATCAAGCTTTAATTTACTCCCGCACCCAGAACCGCTCGTGTGGTTTCTATTTTGCCTTGAGCAATTGTAAGAATCCGTAAGAAACCAACAATCAAATAAATTGAAAA	NaN
RPL33A_29to58_30snps_2	Randomly_Mutated_Window	AAATATTCGCTATCAAGCTTTAATTTACAATGGGGCTATTAGCCAGTCGCCGCATTAATATTTTGCCTTGAGCAATTGTAAGAATCCGTAAGAAACCAACAATCAAATAAATTGAAAA	7.20395
RPL33A_59to88_30snps_1	Randomly_Mutated_Window	AAATATTCGCTATCAAGCTTTAATTTACGTGTATTAATCACTAGTTCAAAACTTGAGTCTAAGCCTGAGCTTACGCAAAGCTTCCTTATAAGAAACCAACAATCAAATAAATTGAAAA	7.73973
RPL33A_59to88_30snps_2	Randomly_Mutated_Window	AAATATTCGCTATCAAGCTTTAATTTACGTGTATTAATCACTAGTTCAAAACTTGAGTCTAGCCAAGGCTTCTTTCGCCTTAGGAGTTTAAGAAACCAACAATCAAATAAATTGAAAA	5.94499
RPL33A_89to118_30snps_1	Randomly_Mutated_Window	AAATATTCGCTATCAAGCTTTAATTTACGTGTATTAATCACTAGTTCAAAACTTGAGTTATTTTGCCTTGAGCAATTGTAAGAATCCGGTCTGGTATTTGTTCACCCGGCTGGTTTTT	3.80325
RPL33A_89to118_30snps_2	Randomly_Mutated_Window	AAATATTCGCTATCAAGCTTTAATTTACGTGTATTAATCACTAGTTCAAAACTTGAGTTATTTTGCCTTGAGCAATTGTAAGAATCCGACTATGTAAGCGCTCTTGCGTGGGACCCGT	NaN
RPL14A_1to28_30snps_1	Randomly_Mutated_Window	ATGAGGGTCTACAGTCCGTTCCCTCGTAAAGGTTAAGTTGATCAGGTCTGCCGATTGTATAACAAATTTAATTGTTTGTCTTAGTGAACAAAGAGAGTCGTGAAAAATAAAATAAACA	NaN
RPL14A_1to28_30snps_2	Randomly_Mutated_Window	ACAGCAGCCGAGTTGTGGTGGAGTTCACAAGGTTAAGTTGATCAGGTCTGCCGATTGTATAACAAATTTAATTGTTTGTCTTAGTGAACAAAGAGAGTCGTGAAAAATAAAATAAACA	7.5762
RPL14A_29to58_30snps_1	Randomly_Mutated_Window	TACTATTGAACTGAAAAAAAAGTAATCTCTTACCTTAACTGCTCTAGGCTAACGAATGATAACAAATTTAATTGTTTGTCTTAGTGAACAAAGAGAGTCGTGAAAAATAAAATAAACA	7.56725
RPL14A_29to58_30snps_2	Randomly_Mutated_Window	TACTATTGAACTGAAAAAAAAGTAATCTTGCTGATTTGAAGAGCACAGCCAATTGCCGATAACAAATTTAATTGTTTGTCTTAGTGAACAAAGAGAGTCGTGAAAAATAAAATAAACA	8.39071
RPL14A_59to88_30snps_1	Randomly_Mutated_Window	TACTATTGAACTGAAAAAAAAGTAATCTAAGGTTAAGTTGATCAGGTCTGCCGATTGTTACTACTCCCGTGAATCAAACTGGGCGATGCAAAGAGAGTCGTGAAAAATAAAATAAACA	3.27106
RPL14A_59to88_30snps_2	Randomly_Mutated_Window	TACTATTGAACTGAAAAAAAAGTAATCTAAGGTTAAGTTGATCAGGTCTGCCGATTGTTGTGGGCCGAACCGACCGAAAGGCCTGCGGCAAAGAGAGTCGTGAAAAATAAAATAAACA	2.3189
RPL14A_89to118_30snps_1	Randomly_Mutated_Window	TACTATTGAACTGAAAAAAAAGTAATCTAAGGTTAAGTTGATCAGGTCTGCCGATTGTATAACAAATTTAATTGTTTGTCTTAGTGAATGGCACCCTGGCACTCGGCCGGTCGGTGGT	NaN
RPL14A_89to118_30snps_2	Randomly_Mutated_Window	TACTATTGAACTGAAAAAAAAGTAATCTAAGGTTAAGTTGATCAGGTCTGCCGATTGTATAACAAATTTAATTGTTTGTCTTAGTGAAGGGGTTCTCGAAATGGCTTCCGTTACGGAT	NaN
RPS21B_1to28_30snps_1	Randomly_Mutated_Window	TGCAAGTCACTCTTCCTCTATTCCAGGGGTTTTATAAACATTGTTAACGAATTTGACTTTAAAGGGGAATTTCAGTTAAAAATCTGATAAAAAAATAAAAGAATATCAATAAGCCAAA	7.88487
RPS21B_1to28_30snps_2	Randomly_Mutated_Window	ACTACGCCACGCTTCCGACTCGCCCCTTGTTTTATAAACATTGTTAACGAATTTGACTTTAAAGGGGAATTTCAGTTAAAAATCTGATAAAAAAATAAAAGAATATCAATAAGCCAAA	7.34696
RPS21B_29to58_30snps_1	Randomly_Mutated_Window	CTAGTAATTGAGGATTATAGGATTGAAATGGGGCGTCCTGCCTAGGCTCTTCCCCGTGTTAAAGGGGAATTTCAGTTAAAAATCTGATAAAAAAATAAAAGAATATCAATAAGCCAAA	4.12052
RPS21B_29to58_30snps_2	Randomly_Mutated_Window	CTAGTAATTGAGGATTATAGGATTGAAATGGACTCTGTTTCGTGCTCTCTCCGCACTATTAAAGGGGAATTTCAGTTAAAAATCTGATAAAAAAATAAAAGAATATCAATAAGCCAAA	NaN
RPS21B_59to88_30snps_1	Randomly_Mutated_Window	CTAGTAATTGAGGATTATAGGATTGAAAGTTTTATAAACATTGTTAACGAATTTGACTGGGTGCTTCTGCCCGTAGAGTCCTATGATAAAAAAAATAAAAGAATATCAATAAGCCAAA	6.68791
RPS21B_59to88_30snps_2	Randomly_Mutated_Window	CTAGTAATTGAGGATTATAGGATTGAAAGTTTTATAAACATTGTTAACGAATTTGACTAGGGGAATACTCGGATAAGCTGTTGAGTTCAAAAAAATAAAAGAATATCAATAAGCCAAA	8.4749
RPS21B_89to118_30snps_1	Randomly_Mutated_Window	CTAGTAATTGAGGATTATAGGATTGAAAGTTTTATAAACATTGTTAACGAATTTGACTTTAAAGGGGAATTTCAGTTAAAAATCTGATGGCCTGTCCGTTATTGGCGGCGGGCTGCTG	1.33994
RPS21B_89to118_30snps_2	Randomly_Mutated_Window	CTAGTAATTGAGGATTATAGGATTGAAAGTTTTATAAACATTGTTAACGAATTTGACTTTAAAGGGGAATTTCAGTTAAAAATCTGATGCTGGTTAGTTTTGCGGCATGGGTCAGCCC	NaN
RPL38_1to28_30snps_1	Randomly_Mutated_Window	GCTCGCTCTACACGGACGAGTATGGGGAAATTAAATTTTCTAATTTCAATGTAGAAATATTTCAACTGTTAGTTTTTTATTTCAGGTTGAATATAGTACGACAAAATATCAAGGAAAA	6.82905
RPL38_1to28_30snps_2	Randomly_Mutated_Window	AAACTTGGTGGTCTCAGCACCGTCCCCAAATTAAATTTTCTAATTTCAATGTAGAAATATTTCAACTGTTAGTTTTTTATTTCAGGTTGAATATAGTACGACAAAATATCAAGGAAAA	9.47302
RPL38_29to58_30snps_1	Randomly_Mutated_Window	TGCACAATATTGAATCTTCAATCTAAAGTCAGTTCGGAGAACGCCATGCCTCGTGTCAATTTCAACTGTTAGTTTTTTATTTCAGGTTGAATATAGTACGACAAAATATCAAGGAAAA	6.17307
RPL38_29to58_30snps_2	Randomly_Mutated_Window	TGCACAATATTGAATCTTCAATCTAAAGCGCACGCGCCATATGCAATTTCCATCCTGGATTTCAACTGTTAGTTTTTTATTTCAGGTTGAATATAGTACGACAAAATATCAAGGAAAA	7.33029
RPL38_59to88_30snps_1	Randomly_Mutated_Window	TGCACAATATTGAATCTTCAATCTAAAGAATTAAATTTTCTAATTTCAATGTAGAAATGAAGACGTCACCCCCACGCACGCCTTTAACGAATATAGTACGACAAAATATCAAGGAAAA	7.3171
RPL38_59to88_30snps_2	Randomly_Mutated_Window	TGCACAATATTGAATCTTCAATCTAAAGAATTAAATTTTCTAATTTCAATGTAGAAATGAACATTTGTCACAGCCCGATACATCATAAGAATATAGTACGACAAAATATCAAGGAAAA	8.57818
RPL38_89to118_30snps_1	Randomly_Mutated_Window	TGCACAATATTGAATCTTCAATCTAAAGAATTAAATTTTCTAATTTCAATGTAGAAATATTTCAACTGTTAGTTTTTTATTTCAGGTTACCACCGAACGTTGCCCCGTGGCCATGCGT	NaN
RPL38_89to118_30snps_2	Randomly_Mutated_Window	TGCACAATATTGAATCTTCAATCTAAAGAATTAAATTTTCTAATTTCAATGTAGAAATATTTCAACTGTTAGTTTTTTATTTCAGGTTACGGGAGAGTTCTACCCGATGTCCTTTCCT	NaN
RPL27A_1to28_30snps_1	Randomly_Mutated_Window	CCAACGCATAACGGGTACAGTGAAACAGGTTTTGAGCTAAAATTAAAGATATATTAGATTTTTAGAATTTCTTAGATAGTCTCAACGTGTTAAAACAAAAGCATAACCAAAGAAAAAA	8.05178
RPL27A_1to28_30snps_2	Randomly_Mutated_Window	ACGAAGAGTCTGCCGGGCGTGCATAACTGTTTTGAGCTAAAATTAAAGATATATTAGATTTTTAGAATTTCTTAGATAGTCTCAACGTGTTAAAACAAAAGCATAACCAAAGAAAAAA	8.43709
RPL27A_29to58_30snps_1	Randomly_Mutated_Window	GTTCGTTCATGTAAAACATACTGCCGTACGAGACGCAAGTTCCCGCGATACGGGGTTGTTTTTAGAATTTCTTAGATAGTCTCAACGTGTTAAAACAAAAGCATAACCAAAGAAAAAA	NaN
RPL27A_29to58_30snps_2	Randomly_Mutated_Window	GTTCGTTCATGTAAAACATACTGCCGTATCAGACTCGCTGGCGCGTCTGACACAAGATTTTTTAGAATTTCTTAGATAGTCTCAACGTGTTAAAACAAAAGCATAACCAAAGAAAAAA	5.13826
RPL27A_59to88_30snps_1	Randomly_Mutated_Window	GTTCGTTCATGTAAAACATACTGCCGTAGTTTTGAGCTAAAATTAAAGATATATTAGAAGCAGTTGCAGAGACGTCGGAGTCATTAAAGTTAAAACAAAAGCATAACCAAAGAAAAAA	8.30926
RPL27A_59to88_30snps_2	Randomly_Mutated_Window	GTTCGTTCATGTAAAACATACTGCCGTAGTTTTGAGCTAAAATTAAAGATATATTAGAGGACACTCTAGCTAACAGGCCCTCTGTTTGGTTAAAACAAAAGCATAACCAAAGAAAAAA	7.91056
RPL27A_89to118_30snps_1	Randomly_Mutated_Window	GTTCGTTCATGTAAAACATACTGCCGTAGTTTTGAGCTAAAATTAAAGATATATTAGATTTTTAGAATTTCTTAGATAGTCTCAACGTCACTTCGATCGGAGTCCCAACTTACTTTGG	NaN
RPL27A_89to118_30snps_2	Randomly_Mutated_Window	GTTCGTTCATGTAAAACATACTGCCGTAGTTTTGAGCTAAAATTAAAGATATATTAGATTTTTAGAATTTCTTAGATAGTCTCAACGTCACTGCCATGTTTAGGCCGTGCGATGCGCT	NaN
RPS30A_1to28_30snps_1	Randomly_Mutated_Window	CGTTCACAGTGGGCTTGTTTCCTGCTCAGGTATGTTGCATTTTAAAGGCTACATGAACTGCACATTAAATTTGCCACTGTAATAATCTTCCATATCCCCATACAAAAACTACGCAAAT	6.19727
RPS30A_1to28_30snps_2	Randomly_Mutated_Window	GCTACACTCGTTGCGAGTAGGAGTAGTGGGTATGTTGCATTTTAAAGGCTACATGAACTGCACATTAAATTTGCCACTGTAATAATCTTCCATATCCCCATACAAAAACTACGCAAAT	7.725
RPS30A_29to58_30snps_1	Randomly_Mutated_Window	ATAGATAGAACAAAACAGCCTTACGAACTTGGAAGGTTGGACGTGCCAGAGACAAGTATGCACATTAAATTTGCCACTGTAATAATCTTCCATATCCCCATACAAAAACTACGCAAAT	NaN
RPS30A_29to58_30snps_2	Randomly_Mutated_Window	ATAGATAGAACAAAACAGCCTTACGAACTAGGCAGCCACCAGCTGCCTGAGAGGCGTTTGCACATTAAATTTGCCACTGTAATAATCTTCCATATCCCCATACAAAAACTACGCAAAT	5.17072
RPS30A_59to88_30snps_1	Randomly_Mutated_Window	ATAGATAGAACAAAACAGCCTTACGAACGGTATGTTGCATTTTAAAGGCTACATGAACCCTCTTAAGGGAGAATAGTGCAGGCTGAAATCCATATCCCCATACAAAAACTACGCAAAT	5.74352
RPS30A_59to88_30snps_2	Randomly_Mutated_Window	ATAGATAGAACAAAACAGCCTTACGAACGGTATGTTGCATTTTAAAGGCTACATGAACGCGCACCGCCTAAATTATTATGGCCTGCAATCCATATCCCCATACAAAAACTACGCAAAT	3.15323
RPS30A_89to118_30snps_1	Randomly_Mutated_Window	ATAGATAGAACAAAACAGCCTTACGAACGGTATGTTGCATTTTAAAGGCTACATGAACTGCACATTAAATTTGCCACTGTAATAATCTCTGCGGGATAACACGCTCCTAACAAACCTC	3.46081
RPS30A_89to118_30snps_2	Randomly_Mutated_Window	ATAGATAGAACAAAACAGCCTTACGAACGGTATGTTGCATTTTAAAGGCTACATGAACTGCACATTAAATTTGCCACTGTAATAATCTGAAGATCAAAATACAGTGGTTGCATGCGGC	NaN
RPS23B_1to28_30snps_1	Randomly_Mutated_Window	GGGTGCTGCCATAGGACAGGGCTGGACCGATACTATTAGTGATGGTAAGGTTATGAAGCTTACATGTTTAATATTGTAGATTCCAGAAGCAGGTAAGAACAACAAACTACAAGAAAAG	5.76091
RPS23B_1to28_30snps_2	Randomly_Mutated_Window	AGAGTATAGCTAAGGGCAAGGGTTATCCGATACTATTAGTGATGGTAAGGTTATGAAGCTTACATGTTTAATATTGTAGATTCCAGAAGCAGGTAAGAACAACAAACTACAAGAAAAG	6.82577
RPS23B_29to58_30snps_1	Randomly_Mutated_Window	TCCACGCTTTCGCAATTTTCAAGATCGAACGTAGGGATAGAGGTTCCTTCGGGCTCGTCTTACATGTTTAATATTGTAGATTCCAGAAGCAGGTAAGAACAACAAACTACAAGAAAAG	5.4557
RPS23B_29to58_30snps_2	Randomly_Mutated_Window	TCCACGCTTTCGCAATTTTCAAGATCGAATGCAGCACTCGACATTGGGCAGACCCGGCCTTACATGTTTAATATTGTAGATTCCAGAAGCAGGTAAGAACAACAAACTACAAGAAAAG	NaN
RPS23B_59to88_30snps_1	Randomly_Mutated_Window	TCCACGCTTTCGCAATTTTCAAGATCGAGATACTATTAGTGATGGTAAGGTTATGAAGACAGACGTAACCGCGGCTATCGCGATCCTGGCAGGTAAGAACAACAAACTACAAGAAAAG	5.45543
RPS23B_59to88_30snps_2	Randomly_Mutated_Window	TCCACGCTTTCGCAATTTTCAAGATCGAGATACTATTAGTGATGGTAAGGTTATGAAGTCGGGCCTCGCGCACCGAAGTCGCGGGTGGGCAGGTAAGAACAACAAACTACAAGAAAAG	3.39144
RPS23B_89to118_30snps_1	Randomly_Mutated_Window	TCCACGCTTTCGCAATTTTCAAGATCGAGATACTATTAGTGATGGTAAGGTTATGAAGCTTACATGTTTAATATTGTAGATTCCAGAATTTTAGGGATTATTGCCCGATATCATCGTT	4.56187
RPS23B_89to118_30snps_2	Randomly_Mutated_Window	TCCACGCTTTCGCAATTTTCAAGATCGAGATACTATTAGTGATGGTAAGGTTATGAAGCTTACATGTTTAATATTGTAGATTCCAGAACACCAATCAGCAGTACGGTCCGCGCGCCTC	5.72319
EFT2_1to28_30snps_1	Randomly_Mutated_Window	GCGGGCGCTCCAGGTATGCCTGAATATGATATTATTCTCTTACATTTCACGATTGCCCTTTTGGTGTTTAGCATTCAGACTCAAAGACCACAAACACAAACTATAACATAATTGCAAG	NaN
EFT2_1to28_30snps_2	Randomly_Mutated_Window	CCGTCGACGGCCTGCCGGGCCTACGGCTATATTATTCTCTTACATTTCACGATTGCCCTTTTGGTGTTTAGCATTCAGACTCAAAGACCACAAACACAAACTATAACATAATTGCAAG	6.20822
EFT2_29to58_30snps_1	Randomly_Mutated_Window	TATATATTCTTGATATCTTAGATTATACTGCCCGAGTCGAGGTGCGATTATCCCCGTATTTTGGTGTTTAGCATTCAGACTCAAAGACCACAAACACAAACTATAACATAATTGCAAG	NaN
EFT2_29to58_30snps_2	Randomly_Mutated_Window	TATATATTCTTGATATCTTAGATTATACCCTCGGAAACAAGGACCAAACACTAAATTGTTTTGGTGTTTAGCATTCAGACTCAAAGACCACAAACACAAACTATAACATAATTGCAAG	NaN
EFT2_59to88_30snps_1	Randomly_Mutated_Window	TATATATTCTTGATATCTTAGATTATACATATTATTCTCTTACATTTCACGATTGCCCGCAATTACAAAGTGGGGATTTGGAGCTCGACACAAACACAAACTATAACATAATTGCAAG	8.70526
EFT2_59to88_30snps_2	Randomly_Mutated_Window	TATATATTCTTGATATCTTAGATTATACATATTATTCTCTTACATTTCACGATTGCCCGCGAAAGTAACTCTGAAGTACAATTGCCGACACAAACACAAACTATAACATAATTGCAAG	10.3808
EFT2_89to118_30snps_1	Randomly_Mutated_Window	TATATATTCTTGATATCTTAGATTATACATATTATTCTCTTACATTTCACGATTGCCCTTTTGGTGTTTAGCATTCAGACTCAAAGACTGATGCAGTGGCGAGGGTTTGCGCGTACTC	NaN
EFT2_89to118_30snps_2	Randomly_Mutated_Window	TATATATTCTTGATATCTTAGATTATACATATTATTCTCTTACATTTCACGATTGCCCTTTTGGTGTTTAGCATTCAGACTCAAAGACACGCTTGGTGCTGCCACTAGGCCACCATCC	0.854485
RPL31A_1to28_30snps_1	Randomly_Mutated_Window	AGGAGGTTGTTTCGAGTGACGGAGCGGCAATTATATTGAAGATTTTATAACTAGTGATAATTTCATTCAAGTTTTAAAGAAAGAATTAATAAGCAAACAGAACTCAATCAAAGGAAAA	8.30385
RPL31A_1to28_30snps_2	Randomly_Mutated_Window	TCTGAGTGGGCTCACTCTCTAGTGCCATAATTATATTGAAGATTTTATAACTAGTGATAATTTCATTCAAGTTTTAAAGAAAGAATTAATAAGCAAACAGAACTCAATCAAAGGAAAA	9.22746
RPL31A_29to58_30snps_1	Randomly_Mutated_Window	GAATCTCATAGCTTGAAAGATAGTATTGGCAACACCAAGGCCAGCGCGCCAGGAGATGAATTTCATTCAAGTTTTAAAGAAAGAATTAATAAGCAAACAGAACTCAATCAAAGGAAAA	3.72728
RPL31A_29to58_30snps_2	Randomly_Mutated_Window	GAATCTCATAGCTTGAAAGATAGTATTGGGGCTAGCACCGCTCAAGTGGGTATAGTTGAATTTCATTCAAGTTTTAAAGAAAGAATTAATAAGCAAACAGAACTCAATCAAAGGAAAA	7.27501
RPL31A_59to88_30snps_1	Randomly_Mutated_Window	GAATCTCATAGCTTGAAAGATAGTATTGAATTATATTGAAGATTTTATAACTAGTGATTCCGCATGAAGCACAGGGCTCTTGCCGGCCATAAGCAAACAGAACTCAATCAAAGGAAAA	6.88821
RPL31A_59to88_30snps_2	Randomly_Mutated_Window	GAATCTCATAGCTTGAAAGATAGTATTGAATTATATTGAAGATTTTATAACTAGTGATCCGCGTGCCGGGCCCAAGTGATGGATTCGTATAAGCAAACAGAACTCAATCAAAGGAAAA	4.09375
RPL31A_89to118_30snps_1	Randomly_Mutated_Window	GAATCTCATAGCTTGAAAGATAGTATTGAATTATATTGAAGATTTTATAACTAGTGATAATTTCATTCAAGTTTTAAAGAAAGAATTACGCCTAGGGGTTCTGATTGGACTCTCCTTG	3.53878
RPL31A_89to118_30snps_2	Randomly_Mutated_Window	GAATCTCATAGCTTGAAAGATAGTATTGAATTATATTGAAGATTTTATAACTAGTGATAATTTCATTCAAGTTTTAAAGAAAGAATTACATTCGTGTACCTTTGATTGTCGCAAGCGT	7.31008
ICL1_1to28_30snps_1	Randomly_Mutated_Window	CGGTAATGCCCGCCGGCAACGGGCGCTTTTTCATCTTATCCTTTTTTTCTTTTCACACCCAAATACCTAACAATTGAGAGAAAACTCTTAGCATAACATAACAAAAAGTCAACGAAAA	4.58615
ICL1_1to28_30snps_2	Randomly_Mutated_Window	TCCTGAGAGCGGCCGGCACTGGCTACGTTTTCATCTTATCCTTTTTTTCTTTTCACACCCAAATACCTAACAATTGAGAGAAAACTCTTAGCATAACATAACAAAAAGTCAACGAAAA	NaN
ICL1_29to58_30snps_1	Randomly_Mutated_Window	ATTCTTATTATTTGTCTTGGCTTGCTAAGCCTGGACATAATGCGCCCGAGCCCTTTCACCAAATACCTAACAATTGAGAGAAAACTCTTAGCATAACATAACAAAAAGTCAACGAAAA	5.84908
ICL1_29to58_30snps_2	Randomly_Mutated_Window	ATTCTTATTATTTGTCTTGGCTTGCTAAGGCGGCTACTCTGCAGCAACTCCACATACACCAAATACCTAACAATTGAGAGAAAACTCTTAGCATAACATAACAAAAAGTCAACGAAAA	6.2289
ICL1_59to88_30snps_1	Randomly_Mutated_Window	ATTCTTATTATTTGTCTTGGCTTGCTAATTTCATCTTATCCTTTTTTTCTTTTCACACGTTCTGGTTGGCACGACAGTTAGTGTAATGTAGCATAACATAACAAAAAGTCAACGAAAA	6.59023
ICL1_59to88_30snps_2	Randomly_Mutated_Window	ATTCTTATTATTTGTCTTGGCTTGCTAATTTCATCTTATCCTTTTTTTCTTTTCACACATTCCCTGAGTTGGCCCTGACTGCCGTCGGTAGCATAACATAACAAAAAGTCAACGAAAA	8.0414
ICL1_89to118_30snps_1	Randomly_Mutated_Window	ATTCTTATTATTTGTCTTGGCTTGCTAATTTCATCTTATCCTTTTTTTCTTTTCACACCCAAATACCTAACAATTGAGAGAAAACTCTACATCATGACATCAGGCGGCGATCGAGTGC	NaN
ICL1_89to118_30snps_2	Randomly_Mutated_Window	ATTCTTATTATTTGTCTTGGCTTGCTAATTTCATCTTATCCTTTTTTTCTTTTCACACCCAAATACCTAACAATTGAGAGAAAACTCTGGCGGGGTATCCCGGCTGTTGAGTACGCGG	2.25943
RPL11B_1to28_30snps_1	Randomly_Mutated_Window	AATTACCCTGATGCGGACCTTCCTACTGACTGTTAAGAGAGGCATTCATTTCGTGTATTATAACGTTTAGCATCAGTTACCCTTGAAAGCCCAACATATACAAAAATACGCGTCCAAG	3.00008
RPL11B_1to28_30snps_2	Randomly_Mutated_Window	GTTCTCCGTTAGCATTCCCGCAGCTACCACTGTTAAGAGAGGCATTCATTTCGTGTATTATAACGTTTAGCATCAGTTACCCTTGAAAGCCCAACATATACAAAAATACGCGTCCAAG	NaN
RPL11B_29to58_30snps_1	Randomly_Mutated_Window	TGGACATAACTCATCATTAAAGAAGTATGGGACACCTCTGTTAGGGTGGCGTCCTGCCTATAACGTTTAGCATCAGTTACCCTTGAAAGCCCAACATATACAAAAATACGCGTCCAAG	4.73057
RPL11B_29to58_30snps_2	Randomly_Mutated_Window	TGGACATAACTCATCATTAAAGAAGTATCTAACCTTTGCTAATCGCTTCCCTACAGCGTATAACGTTTAGCATCAGTTACCCTTGAAAGCCCAACATATACAAAAATACGCGTCCAAG	7.67404
RPL11B_59to88_30snps_1	Randomly_Mutated_Window	TGGACATAACTCATCATTAAAGAAGTATACTGTTAAGAGAGGCATTCATTTCGTGTATCGGTTGTGAACAATCAGAGGCGAAGATTGGGCCCAACATATACAAAAATACGCGTCCAAG	6.84509
RPL11B_59to88_30snps_2	Randomly_Mutated_Window	TGGACATAACTCATCATTAAAGAAGTATACTGTTAAGAGAGGCATTCATTTCGTGTATGGGGCATCCGTTGGCAGCACTGATGGTCCTGCCCAACATATACAAAAATACGCGTCCAAG	3.43644
RPL11B_89to118_30snps_1	Randomly_Mutated_Window	TGGACATAACTCATCATTAAAGAAGTATACTGTTAAGAGAGGCATTCATTTCGTGTATTATAACGTTTAGCATCAGTTACCCTTGAAATGTTTCTCGGCGACTGTGACTATCGATTCA	3.81804
RPL11B_89to118_30snps_2	Randomly_Mutated_Window	TGGACATAACTCATCATTAAAGAAGTATACTGTTAAGAGAGGCATTCATTTCGTGTATTATAACGTTTAGCATCAGTTACCCTTGAAACGGTGCACGGGTTTTGCCATAAGACGTTCA	3.34471
RPL43B_1to28_30snps_1	Randomly_Mutated_Window	CCAGGATGCTCAGGACCGGGATGTGGTGGAATCAGAATATATTACTGCCCTTCGTGTTGTAGGGTTATTCATTAACTATATACGATATTATAAACAGCATAGATAATCAAACAAAAAA	1.2673
RPL43B_1to28_30snps_2	Randomly_Mutated_Window	GTTGGATCCTGCGGTCCCAGAGGTGCCGGAATCAGAATATATTACTGCCCTTCGTGTTGTAGGGTTATTCATTAACTATATACGATATTATAAACAGCATAGATAATCAAACAAAAAA	NaN
RPL43B_29to58_30snps_1	Randomly_Mutated_Window	AGCTTGAAAAATTTGAAATTTCAACTGATTTGTTTCTGTACGCTTGAGTTAGTCGCGCGTAGGGTTATTCATTAACTATATACGATATTATAAACAGCATAGATAATCAAACAAAAAA	NaN
RPL43B_29to58_30snps_2	Randomly_Mutated_Window	AGCTTGAAAAATTTGAAATTTCAACTGACCGAATAGCGCGGGGGGAAGAGAGAAATAGGTAGGGTTATTCATTAACTATATACGATATTATAAACAGCATAGATAATCAAACAAAAAA	NaN
RPL43B_59to88_30snps_1	Randomly_Mutated_Window	AGCTTGAAAAATTTGAAATTTCAACTGAGAATCAGAATATATTACTGCCCTTCGTGTTTACCCACGGCCAGGGGGTCCGGCCTAGATGTATAAACAGCATAGATAATCAAACAAAAAA	4.45983
RPL43B_59to88_30snps_2	Randomly_Mutated_Window	AGCTTGAAAAATTTGAAATTTCAACTGAGAATCAGAATATATTACTGCCCTTCGTGTTCATCTACCGCAGCCCTTGCCATCTAAGATCTATAAACAGCATAGATAATCAAACAAAAAA	9.40147
RPL43B_89to118_30snps_1	Randomly_Mutated_Window	AGCTTGAAAAATTTGAAATTTCAACTGAGAATCAGAATATATTACTGCCCTTCGTGTTGTAGGGTTATTCATTAACTATATACGATATCCGCCTACTTGCTTTCTGCAGTTTCGCCCT	4.61137
RPL43B_89to118_30snps_2	Randomly_Mutated_Window	AGCTTGAAAAATTTGAAATTTCAACTGAGAATCAGAATATATTACTGCCCTTCGTGTTGTAGGGTTATTCATTAACTATATACGATATGGCGCTATTTTGTTGACTAATCCTTTGGGT	2.59554
RPS16A_1to28_30snps_1	Randomly_Mutated_Window	CTAAGGTTCCACTGTTATTTGCTAGGTGACATAAAAATAGCCTACAAATTCTGAACTCTGTAAAGGAAGCCTCATAAATAAAGGTAGATAGTAAAGTATACAAGAGAAGAATCCCAAG	8.51334
RPS16A_1to28_30snps_2	Randomly_Mutated_Window	AACTATTAGCAGCCAGTTTGGGCAGGCAACATAAAAATAGCCTACAAATTCTGAACTCTGTAAAGGAAGCCTCATAAATAAAGGTAGATAGTAAAGTATACAAGAGAAGAATCCCAAG	NaN
RPS16A_29to58_30snps_1	Randomly_Mutated_Window	GCTGCAACAACTGAGAGGGCAAGGATATCAGGTCTCTCGATGGCTCTCAGGGCCTGCGTGTAAAGGAAGCCTCATAAATAAAGGTAGATAGTAAAGTATACAAGAGAAGAATCCCAAG	5.5567
RPS16A_29to58_30snps_2	Randomly_Mutated_Window	GCTGCAACAACTGAGAGGGCAAGGATATCAGCGTGCTATCGAGTTGGCCAAGCTGTCTTGTAAAGGAAGCCTCATAAATAAAGGTAGATAGTAAAGTATACAAGAGAAGAATCCCAAG	NaN
RPS16A_59to88_30snps_1	Randomly_Mutated_Window	GCTGCAACAACTGAGAGGGCAAGGATATACATAAAAATAGCCTACAAATTCTGAACTCCAAGTGCTTCTGTGGGGCTCCCGCATATATTAGTAAAGTATACAAGAGAAGAATCCCAAG	5.71127
RPS16A_59to88_30snps_2	Randomly_Mutated_Window	GCTGCAACAACTGAGAGGGCAAGGATATACATAAAAATAGCCTACAAATTCTGAACTCGTACTCCAGTTTACTCCGCTGTTCTCCTCGTAGTAAAGTATACAAGAGAAGAATCCCAAG	6.32108
RPS16A_89to118_30snps_1	Randomly_Mutated_Window	GCTGCAACAACTGAGAGGGCAAGGATATACATAAAAATAGCCTACAAATTCTGAACTCTGTAAAGGAAGCCTCATAAATAAAGGTAGAGTAGGTCTGCAGGCGTCCTTTGTGGTGTGC	5.59754
RPS16A_89to118_30snps_2	Randomly_Mutated_Window	GCTGCAACAACTGAGAGGGCAAGGATATACATAAAAATAGCCTACAAATTCTGAACTCTGTAAAGGAAGCCTCATAAATAAAGGTAGAGCTACGTTCGGGTGTTCATCCGTCATTCTT	4.91849
RPL33B_1to28_30snps_1	Randomly_Mutated_Window	ATCGAGTCTGCGTATTTTTCCAACTGGGAAACGATTATTATAGCAGATAAAGGTCCGAAAACAGTTTCTTTGCTTAAACAACCTTTGCAAAAGTAGAACCAGATAAATCATAGATAAA	7.9003
RPL33B_1to28_30snps_2	Randomly_Mutated_Window	ATTGCCGTACATAGCTAGCTCGAATGCTAAACGATTATTATAGCAGATAAAGGTCCGAAAACAGTTTCTTTGCTTAAACAACCTTTGCAAAAGTAGAACCAGATAAATCATAGATAAA	6.94266
RPL33B_29to58_30snps_1	Randomly_Mutated_Window	CAGTTACGCTTAGCACCAGATTTTGAAAGGGACGACCGCCGTCGTTTGCCTTCGTGCTAAACAGTTTCTTTGCTTAAACAACCTTTGCAAAAGTAGAACCAGATAAATCATAGATAAA	3.65958
RPL33B_29to58_30snps_2	Randomly_Mutated_Window	CAGTTACGCTTAGCACCAGATTTTGAAAGGCAATGCGGAGCCCTTCGCGGGCCCAACTAAACAGTTTCTTTGCTTAAACAACCTTTGCAAAAGTAGAACCAGATAAATCATAGATAAA	2.3963
RPL33B_59to88_30snps_1	Randomly_Mutated_Window	CAGTTACGCTTAGCACCAGATTTTGAAAAAACGATTATTATAGCAGATAAAGGTCCGAGCCTTTGCCTCACCGGCGTTAGCGGACGCTAAAAGTAGAACCAGATAAATCATAGATAAA	3.24725
RPL33B_59to88_30snps_2	Randomly_Mutated_Window	CAGTTACGCTTAGCACCAGATTTTGAAAAAACGATTATTATAGCAGATAAAGGTCCGATGGATACGGTCCATGACGGTACGAGCGGTAAAAAGTAGAACCAGATAAATCATAGATAAA	4.33584
RPL33B_89to118_30snps_1	Randomly_Mutated_Window	CAGTTACGCTTAGCACCAGATTTTGAAAAAACGATTATTATAGCAGATAAAGGTCCGAAAACAGTTTCTTTGCTTAAACAACCTTTGCTGGGAGCCTCTGCTTGCGTATTGGTCATCG	5.56866
RPL33B_89to118_30snps_2	Randomly_Mutated_Window	CAGTTACGCTTAGCACCAGATTTTGAAAAAACGATTATTATAGCAGATAAAGGTCCGAAAACAGTTTCTTTGCTTAAACAACCTTTGCGGCTCGGCCTGAGCCGGGTGGCGTAGATTC	2.31611
RPS1A_1to28_30snps_1	Randomly_Mutated_Window	CCGACGTTGATTGGAAGTCCTTACAATTAACTATTCTATTAAGAAAGGAAGGTGTTCACGTTGTGAACTTTAATATTAAGGAAACAAAACAAGCACACGAATAACCAATCGTTTAATC	7.55362
RPS1A_1to28_30snps_2	Randomly_Mutated_Window	CTCCGCGAGTGGTCACTGCCCCCAGGTAAACTATTCTATTAAGAAAGGAAGGTGTTCACGTTGTGAACTTTAATATTAAGGAAACAAAACAAGCACACGAATAACCAATCGTTTAATC	7.21661
RPS1A_29to58_30snps_1	Randomly_Mutated_Window	TAATATACCCAAAATGACTAGATGTCACTTAATGATAGGGCTACGTACCCCCACGCACCGTTGTGAACTTTAATATTAAGGAAACAAAACAAGCACACGAATAACCAATCGTTTAATC	5.56708
RPS1A_29to58_30snps_2	Randomly_Mutated_Window	TAATATACCCAAAATGACTAGATGTCACCCAGGCATGTGCCTTGGGAACTACGTCCAGCGTTGTGAACTTTAATATTAAGGAAACAAAACAAGCACACGAATAACCAATCGTTTAATC	NaN
RPS1A_59to88_30snps_1	Randomly_Mutated_Window	TAATATACCCAAAATGACTAGATGTCACAACTATTCTATTAAGAAAGGAAGGTGTTCAACCCTATGTACAGTCGCGCTCCATGGATGGACAAGCACACGAATAACCAATCGTTTAATC	2.93316
RPS1A_59to88_30snps_2	Randomly_Mutated_Window	TAATATACCCAAAATGACTAGATGTCACAACTATTCTATTAAGAAAGGAAGGTGTTCATCCGAATGGAAAGGTATAGGTCCCCTTGTCACAAGCACACGAATAACCAATCGTTTAATC	5.17626
RPS1A_89to118_30snps_1	Randomly_Mutated_Window	TAATATACCCAAAATGACTAGATGTCACAACTATTCTATTAAGAAAGGAAGGTGTTCACGTTGTGAACTTTAATATTAAGGAAACAAATGTTTAGTGGCTTGGTTACTCATAGAGCCG	3.44266
RPS1A_89to118_30snps_2	Randomly_Mutated_Window	TAATATACCCAAAATGACTAGATGTCACAACTATTCTATTAAGAAAGGAAGGTGTTCACGTTGTGAACTTTAATATTAAGGAAACAAAGATTCGGGTGAGGATTTGGGCTAGGAGGCG	3.92802
RPL23B_1to28_30snps_1	Randomly_Mutated_Window	CAGAGCGTTTACTTCAACGCCCAACGGGTCAAGAAGTATATAGATTTTGAATATTGATTAAGCGAGTAATATTGCTATTTCGAAATAATCGAGAAATCACGATAATAATACAGCAAAA	7.77575
RPL23B_1to28_30snps_2	Randomly_Mutated_Window	CAGAGACTGCAGTTCACATTGTAACCTTTCAAGAAGTATATAGATTTTGAATATTGATTAAGCGAGTAATATTGCTATTTCGAAATAATCGAGAAATCACGATAATAATACAGCAAAA	8.58417
RPL23B_29to58_30snps_1	Randomly_Mutated_Window	TTCTTTTCAGTTGGATGGAGAGTTATAAGGGCATGAACGTACAGCGGAACTCGACATATAAGCGAGTAATATTGCTATTTCGAAATAATCGAGAAATCACGATAATAATACAGCAAAA	8.40596
RPL23B_29to58_30snps_2	Randomly_Mutated_Window	TTCTTTTCAGTTGGATGGAGAGTTATAAGATTATGTCTGTCGTGCGAAATCATACCGCTAAGCGAGTAATATTGCTATTTCGAAATAATCGAGAAATCACGATAATAATACAGCAAAA	7.57099
RPL23B_59to88_30snps_1	Randomly_Mutated_Window	TTCTTTTCAGTTGGATGGAGAGTTATAATCAAGAAGTATATAGATTTTGAATATTGATAGGAACGTACTCCGCATCTGAATCTTGCTCTCGAGAAATCACGATAATAATACAGCAAAA	8.0786
RPL23B_59to88_30snps_2	Randomly_Mutated_Window	TTCTTTTCAGTTGGATGGAGAGTTATAATCAAGAAGTATATAGATTTTGAATATTGATAGTCGTGTCGTCCACTAATAAGGTCGCAGGTCGAGAAATCACGATAATAATACAGCAAAA	8.64702
RPL23B_89to118_30snps_1	Randomly_Mutated_Window	TTCTTTTCAGTTGGATGGAGAGTTATAATCAAGAAGTATATAGATTTTGAATATTGATTAAGCGAGTAATATTGCTATTTCGAAATAAATCTAGGTGACACGGGCCGGGGATAGTGCT	5.84636
RPL23B_89to118_30snps_2	Randomly_Mutated_Window	TTCTTTTCAGTTGGATGGAGAGTTATAATCAAGAAGTATATAGATTTTGAATATTGATTAAGCGAGTAATATTGCTATTTCGAAATAAGTATTTTCCGCAACCTGCTTGGTCCTGTGT	NaN
RPL17A_1to28_30snps_1	Randomly_Mutated_Window	TGCGCCAGTGGCAAAGTATCCGTGTTACCAACGGCTAGCATAAAACAACTACTAACGTTTTCAGTGCTATATTCGAAAGAGCAAACAAAGAGTCCTCAAGAACTACTAATAGATTAAA	7.77038
RPL17A_1to28_30snps_2	Randomly_Mutated_Window	TGCCGTTGGTGCGACTTGGCCCTGATAACAACGGCTAGCATAAAACAACTACTAACGTTTTCAGTGCTATATTCGAAAGAGCAAACAAAGAGTCCTCAAGAACTACTAATAGATTAAA	8.38701
RPL17A_29to58_30snps_1	Randomly_Mutated_Window	GCAATGGAAATTTCTAACATTAGAGCTTGCTTTAAACTTGCTTCCTGTGATACCTTCATTTCAGTGCTATATTCGAAAGAGCAAACAAAGAGTCCTCAAGAACTACTAATAGATTAAA	10.1042
RPL17A_29to58_30snps_2	Randomly_Mutated_Window	GCAATGGAAATTTCTAACATTAGAGCTTGTGTTCTGCAATGCTCGAGTGCCTATCAAATTTCAGTGCTATATTCGAAAGAGCAAACAAAGAGTCCTCAAGAACTACTAATAGATTAAA	7.57628
RPL17A_59to88_30snps_1	Randomly_Mutated_Window	GCAATGGAAATTTCTAACATTAGAGCTTCAACGGCTAGCATAAAACAACTACTAACGTGGCGGTATACGATAGAACTCCCTTCGCACCAGAGTCCTCAAGAACTACTAATAGATTAAA	8.27832
RPL17A_59to88_30snps_2	Randomly_Mutated_Window	GCAATGGAAATTTCTAACATTAGAGCTTCAACGGCTAGCATAAAACAACTACTAACGTGAAGGTCATATAGCCTAGCTTTAATCTACGAGAGTCCTCAAGAACTACTAATAGATTAAA	8.72992
RPL17A_89to118_30snps_1	Randomly_Mutated_Window	GCAATGGAAATTTCTAACATTAGAGCTTCAACGGCTAGCATAAAACAACTACTAACGTTTTCAGTGCTATATTCGAAAGAGCAAACAACTCCATTGAGTATCACCTAGTACATCATTG	6.68569
RPL17A_89to118_30snps_2	Randomly_Mutated_Window	GCAATGGAAATTTCTAACATTAGAGCTTCAACGGCTAGCATAAAACAACTACTAACGTTTTCAGTGCTATATTCGAAAGAGCAAACAACATAGGTCGCCAGTTATACCTAGATAGCCT	7.66052
RPP2A_1to28_30snps_1	Randomly_Mutated_Window	GGCTGTCATACTGGGGAAACGCCCAAGTCTTCCGTTTATTCAAAAGCTTTTTCTATTATTTTAGTGATTTTTTTCTCATTGGAAATTCATACACAACAACAGAACCAATCATACAAAA	7.58579
RPP2A_1to28_30snps_2	Randomly_Mutated_Window	CCGGCCCGACCCTCGTATCACGACCTCGCTTCCGTTTATTCAAAAGCTTTTTCTATTATTTTAGTGATTTTTTTCTCATTGGAAATTCATACACAACAACAGAACCAATCATACAAAA	7.92792
RPP2A_29to58_30snps_1	Randomly_Mutated_Window	TTTCAATTGTTACTTCTGGTAATTTCTAACATATAACCACAGGCGATAGAAGTGCGACTTTTAGTGATTTTTTTCTCATTGGAAATTCATACACAACAACAGAACCAATCATACAAAA	NaN
RPP2A_29to58_30snps_2	Randomly_Mutated_Window	TTTCAATTGTTACTTCTGGTAATTTCTAGCCGTCCAGCGAGCCGGCAAGAAGTCTGATTTTTAGTGATTTTTTTCTCATTGGAAATTCATACACAACAACAGAACCAATCATACAAAA	NaN
RPP2A_59to88_30snps_1	Randomly_Mutated_Window	TTTCAATTGTTACTTCTGGTAATTTCTACTTCCGTTTATTCAAAAGCTTTTTCTATTAGGCCCCGCTCGGCAGATGGGGCCATCTACAATACACAACAACAGAACCAATCATACAAAA	NaN
RPP2A_59to88_30snps_2	Randomly_Mutated_Window	TTTCAATTGTTACTTCTGGTAATTTCTACTTCCGTTTATTCAAAAGCTTTTTCTATTAACGACCCACGCAACAGGAGGCCAACCCGGGATACACAACAACAGAACCAATCATACAAAA	8.18261
RPP2A_89to118_30snps_1	Randomly_Mutated_Window	TTTCAATTGTTACTTCTGGTAATTTCTACTTCCGTTTATTCAAAAGCTTTTTCTATTATTTTAGTGATTTTTTTCTCATTGGAAATTCTCGAGTTCGGCTTTCCTACGATTCCGGCCT	4.46765
RPP2A_89to118_30snps_2	Randomly_Mutated_Window	TTTCAATTGTTACTTCTGGTAATTTCTACTTCCGTTTATTCAAAAGCTTTTTCTATTATTTTAGTGATTTTTTTCTCATTGGAAATTCCCTGTTTTGCTAGTTCAGTTCGCAGGTGTG	6.74345
ARO4_1to28_30snps_1	Randomly_Mutated_Window	AGTATCGAGCGGCATCGTCCTACGTGTAAATTAAGAATAACTAGAAGAGTCTCTCTTTATATTCGTTTATTTTATATATTTAACCGCTAAATTTAGTAAACAAAAGAATCTATCAGAA	7.45504
ARO4_1to28_30snps_2	Randomly_Mutated_Window	GGTGTCCAAGATCTGGATAACCTCCTTGAATTAAGAATAACTAGAAGAGTCTCTCTTTATATTCGTTTATTTTATATATTTAACCGCTAAATTTAGTAAACAAAAGAATCTATCAGAA	7.92841
ARO4_29to58_30snps_1	Randomly_Mutated_Window	TCGTCATTTTTAGCATCGTTATAAGAGTCCAGTCCGTGGGAGCCCGCGCGGATGGAGCATATTCGTTTATTTTATATATTTAACCGCTAAATTTAGTAAACAAAAGAATCTATCAGAA	6.16823
ARO4_29to58_30snps_2	Randomly_Mutated_Window	TCGTCATTTTTAGCATCGTTATAAGAGTCTCGTGTTCGCCTATCGGAGCCGGTGAAGGATATTCGTTTATTTTATATATTTAACCGCTAAATTTAGTAAACAAAAGAATCTATCAGAA	7.73598
ARO4_59to88_30snps_1	Randomly_Mutated_Window	TCGTCATTTTTAGCATCGTTATAAGAGTAATTAAGAATAACTAGAAGAGTCTCTCTTTTGGCGGTGGATGAAACAGAGAGCCTAACTCAAATTTAGTAAACAAAAGAATCTATCAGAA	9.3799
ARO4_59to88_30snps_2	Randomly_Mutated_Window	TCGTCATTTTTAGCATCGTTATAAGAGTAATTAAGAATAACTAGAAGAGTCTCTCTTTCAGAAGTGCCCGACCGGCCCAAGGGATTACAAATTTAGTAAACAAAAGAATCTATCAGAA	8.65857
ARO4_89to118_30snps_1	Randomly_Mutated_Window	TCGTCATTTTTAGCATCGTTATAAGAGTAATTAAGAATAACTAGAAGAGTCTCTCTTTATATTCGTTTATTTTATATATTTAACCGCTGCTCGAGCCGCGGGTCTTTTCGGTGGCTCC	2.44777
ARO4_89to118_30snps_2	Randomly_Mutated_Window	TCGTCATTTTTAGCATCGTTATAAGAGTAATTAAGAATAACTAGAAGAGTCTCTCTTTATATTCGTTTATTTTATATATTTAACCGCTGTTGAATCATCTTCCCTTGTAGAGCTCCGC	NaN
HAC1_1to28_30snps_1	Randomly_Mutated_Window	GCCGGTAATGCTGGCGTTAACGCCTCAATCTTCTTGTTTTATTTAAACTTCCAAGGCTTTAACTCAGTGTCAAACATAACAACCTCCTCCTCCCCCACCTACGACAACAACCGCCACT	8.62877
HAC1_1to28_30snps_2	Randomly_Mutated_Window	CGGAGGTGCGTTAACGGAAGGTCGGAGATCTTCTTGTTTTATTTAAACTTCCAAGGCTTTAACTCAGTGTCAAACATAACAACCTCCTCCTCCCCCACCTACGACAACAACCGCCACT	7.98908
HAC1_29to58_30snps_1	Randomly_Mutated_Window	TTTTTAGCGAAATTTTCCTTTCTTCTTGAACGTACCCAAATACCCCTAGAGACCTTTCTTAACTCAGTGTCAAACATAACAACCTCCTCCTCCCCCACCTACGACAACAACCGCCACT	NaN
HAC1_29to58_30snps_2	Randomly_Mutated_Window	TTTTTAGCGAAATTTTCCTTTCTTCTTGAGGCAAGTGGAAGGGGGTGTGCATGTTAACTTAACTCAGTGTCAAACATAACAACCTCCTCCTCCCCCACCTACGACAACAACCGCCACT	4.85818
HAC1_59to88_30snps_1	Randomly_Mutated_Window	TTTTTAGCGAAATTTTCCTTTCTTCTTGTCTTCTTGTTTTATTTAAACTTCCAAGGCTCACGGCATTCACGGGGGTGTCTCTGACTTCCCTCCCCCACCTACGACAACAACCGCCACT	NaN
HAC1_59to88_30snps_2	Randomly_Mutated_Window	TTTTTAGCGAAATTTTCCTTTCTTCTTGTCTTCTTGTTTTATTTAAACTTCCAAGGCTGGCCGGGCTACGACGTTGGCTTGCAAGATCCCTCCCCCACCTACGACAACAACCGCCACT	4.24462
HAC1_89to118_30snps_1	Randomly_Mutated_Window	TTTTTAGCGAAATTTTCCTTTCTTCTTGTCTTCTTGTTTTATTTAAACTTCCAAGGCTTTAACTCAGTGTCAAACATAACAACCTCCTAAAAGAGAGTGATACTGTCTTGATCAACGG	6.53783
HAC1_89to118_30snps_2	Randomly_Mutated_Window	TTTTTAGCGAAATTTTCCTTTCTTCTTGTCTTCTTGTTTTATTTAAACTTCCAAGGCTTTAACTCAGTGTCAAACATAACAACCTCCTGGCAAAGACTTGGTATATCATCTATTAGGA	8.2264
ARF1_1to28_30snps_1	Randomly_Mutated_Window	TAGACAAGTCAAACCGGCTTGAAGGAGTGATAGAAAGTTCATTTTGTTTTGAAACTTTTTGGAACCTCTGGCATTGAAGGTATAAGAAAGAACTCAAACAGGTTTAATAGAATTAAAA	7.01118
ARF1_1to28_30snps_2	Randomly_Mutated_Window	TCTCGCTCTTCCGCGGGCGAGGCACACCGATAGAAAGTTCATTTTGTTTTGAAACTTTTTGGAACCTCTGGCATTGAAGGTATAAGAAAGAACTCAAACAGGTTTAATAGAATTAAAA	4.75183
ARF1_29to58_30snps_1	Randomly_Mutated_Window	ATCGAGGTGGTTTTTATAAGTCTTACTATTAGTTTTCCGTGCGACCACAGTGTGTGACTTGGAACCTCTGGCATTGAAGGTATAAGAAAGAACTCAAACAGGTTTAATAGAATTAAAA	7.68366
ARF1_29to58_30snps_2	Randomly_Mutated_Window	ATCGAGGTGGTTTTTATAAGTCTTACTATCGTTCTGAGGTCGAAAACCCACCCTAGAATTGGAACCTCTGGCATTGAAGGTATAAGAAAGAACTCAAACAGGTTTAATAGAATTAAAA	7.65923
ARF1_59to88_30snps_1	Randomly_Mutated_Window	ATCGAGGTGGTTTTTATAAGTCTTACTAGATAGAAAGTTCATTTTGTTTTGAAACTTTCCAATCAAGAGCCATGGTTTAACGGGGCTCAGAACTCAAACAGGTTTAATAGAATTAAAA	7.42249
ARF1_59to88_30snps_2	Randomly_Mutated_Window	ATCGAGGTGGTTTTTATAAGTCTTACTAGATAGAAAGTTCATTTTGTTTTGAAACTTTCATTTGTGCTAAATCCCATTTCCTGGGAGGAGAACTCAAACAGGTTTAATAGAATTAAAA	10.1495
ARF1_89to118_30snps_1	Randomly_Mutated_Window	ATCGAGGTGGTTTTTATAAGTCTTACTAGATAGAAAGTTCATTTTGTTTTGAAACTTTTTGGAACCTCTGGCATTGAAGGTATAAGAAGATGACTGGTTCCAAAGCGCTTGTGAGGGC	NaN
ARF1_89to118_30snps_2	Randomly_Mutated_Window	ATCGAGGTGGTTTTTATAAGTCTTACTAGATAGAAAGTTCATTTTGTTTTGAAACTTTTTGGAACCTCTGGCATTGAAGGTATAAGAAGTCCAATGTGTCCCAGGCGGCTCCGATGCT	NaN
ILV3_1to28_30snps_1	Randomly_Mutated_Window	CACTAGGCTGCACTCCGGTAGGTGCCTCAGACTGAAGTTTTATTATGCATTGTAGCGCCTGTAATCTTTAGTAACGGATTCTTGTATTTTTTTGTAAACAGCCAAGAAAAAAGTAGAG	3.3358
ILV3_1to28_30snps_2	Randomly_Mutated_Window	TAGGATACTGTGGTAACTGTGTGGCCGCAGACTGAAGTTTTATTATGCATTGTAGCGCCTGTAATCTTTAGTAACGGATTCTTGTATTTTTTTGTAAACAGCCAAGAAAAAAGTAGAG	NaN
ILV3_29to58_30snps_1	Randomly_Mutated_Window	AGTATATTATATAATGTAACAAAAGAAGTAGACATGCGGACCGCCATGTAATCGCAATCTGTAATCTTTAGTAACGGATTCTTGTATTTTTTTGTAAACAGCCAAGAAAAAAGTAGAG	7.62071
ILV3_29to58_30snps_2	Randomly_Mutated_Window	AGTATATTATATAATGTAACAAAAGAAGGTGAGCGTAGACGGGAGATGTAAAGCATCGCTGTAATCTTTAGTAACGGATTCTTGTATTTTTTTGTAAACAGCCAAGAAAAAAGTAGAG	6.9147
ILV3_59to88_30snps_1	Randomly_Mutated_Window	AGTATATTATATAATGTAACAAAAGAAGAGACTGAAGTTTTATTATGCATTGTAGCGCACAAGCCTCCGGTCGTTTTTGGTCCTGGGATTTTTGTAAACAGCCAAGAAAAAAGTAGAG	NaN
ILV3_59to88_30snps_2	Randomly_Mutated_Window	AGTATATTATATAATGTAACAAAAGAAGAGACTGAAGTTTTATTATGCATTGTAGCGCTGTGTTGAACAGCACGTACCGCTAGTGTCGTTTTTGTAAACAGCCAAGAAAAAAGTAGAG	7.05216
ILV3_89to118_30snps_1	Randomly_Mutated_Window	AGTATATTATATAATGTAACAAAAGAAGAGACTGAAGTTTTATTATGCATTGTAGCGCCTGTAATCTTTAGTAACGGATTCTTGTATTAGGGGACTGGTTTTACCCGTTGTTAATCTC	3.39782
ILV3_89to118_30snps_2	Randomly_Mutated_Window	AGTATATTATATAATGTAACAAAAGAAGAGACTGAAGTTTTATTATGCATTGTAGCGCCTGTAATCTTTAGTAACGGATTCTTGTATTCCGGGTGGGTAGCGTTCTCCTTTTCAGTTT	6.62718
PFK2_1to28_30snps_1	Randomly_Mutated_Window	CCAGCGAAGACGAAACGCCACTGAGAGGCTTGCTTAAAAGCCTTTCTTATACCTCATTTGAACAATAGAACTAGATTTAGAGACTAGTTTAGCATTGGCCAAGAACTAACCATACGCA	7.73239
PFK2_1to28_30snps_2	Randomly_Mutated_Window	GGTGAAGAAGGAGGACAAGACGAAGGGACTTGCTTAAAAGCCTTTCTTATACCTCATTTGAACAATAGAACTAGATTTAGAGACTAGTTTAGCATTGGCCAAGAACTAACCATACGCA	NaN
PFK2_29to58_30snps_1	Randomly_Mutated_Window	TTCCTTTTTTTTTTTTTTTTTCCTTCTTTGACGACTTTGAATGGGTCACCCAAGTTGCTGAACAATAGAACTAGATTTAGAGACTAGTTTAGCATTGGCCAAGAACTAACCATACGCA	8.23712
PFK2_29to58_30snps_2	Randomly_Mutated_Window	TTCCTTTTTTTTTTTTTTTTTCCTTCTTAAACAGGTTCGATAACAAAGTCTTAGTCGGTGAACAATAGAACTAGATTTAGAGACTAGTTTAGCATTGGCCAAGAACTAACCATACGCA	9.09563
PFK2_59to88_30snps_1	Randomly_Mutated_Window	TTCCTTTTTTTTTTTTTTTTTCCTTCTTCTTGCTTAAAAGCCTTTCTTATACCTCATTATCTTGTCGACGTAGACGCATTTCCAGCTCTTAGCATTGGCCAAGAACTAACCATACGCA	NaN
PFK2_59to88_30snps_2	Randomly_Mutated_Window	TTCCTTTTTTTTTTTTTTTTTCCTTCTTCTTGCTTAAAAGCCTTTCTTATACCTCATTATTTTTCGCTGCGACTGCCCGCTACTATCCTTAGCATTGGCCAAGAACTAACCATACGCA	8.8701
PFK2_89to118_30snps_1	Randomly_Mutated_Window	TTCCTTTTTTTTTTTTTTTTTCCTTCTTCTTGCTTAAAAGCCTTTCTTATACCTCATTTGAACAATAGAACTAGATTTAGAGACTAGTCCCCGGCAAAAGGCTGCTACCGGTCCACTC	NaN
PFK2_89to118_30snps_2	Randomly_Mutated_Window	TTCCTTTTTTTTTTTTTTTTTCCTTCTTCTTGCTTAAAAGCCTTTCTTATACCTCATTTGAACAATAGAACTAGATTTAGAGACTAGTGGGCTGACAAGATCCCGAGGCAGGATTTGT	6.08063
RPL4B_1to28_30snps_1	Randomly_Mutated_Window	TCAAAGACGCTGCCGTGCCGCCGATAATCACTACTATTATTATTGAAAATAATATTTCTTTCCTATCAGCAATCGCTTACATATTCATAGTCATTTACTAGGGTATATACCAATAATA	NaN
RPL4B_1to28_30snps_2	Randomly_Mutated_Window	GAGGAGTCACTTTTAGCGTTTCGGTGCGCACTACTATTATTATTGAAAATAATATTTCTTTCCTATCAGCAATCGCTTACATATTCATAGTCATTTACTAGGGTATATACCAATAATA	6.6274
RPL4B_29to58_30snps_1	Randomly_Mutated_Window	AGTTTTCATGAAGATCATGAATACGTTATCGCCACCAGGAAGCCACGTTGGTAGCGAGTTTCCTATCAGCAATCGCTTACATATTCATAGTCATTTACTAGGGTATATACCAATAATA	3.82516
RPL4B_29to58_30snps_2	Randomly_Mutated_Window	AGTTTTCATGAAGATCATGAATACGTTAGTTGCTATCGGAGGCGCGCCGGGGGGAGCATTTCCTATCAGCAATCGCTTACATATTCATAGTCATTTACTAGGGTATATACCAATAATA	2.31914
RPL4B_59to88_30snps_1	Randomly_Mutated_Window	AGTTTTCATGAAGATCATGAATACGTTACACTACTATTATTATTGAAAATAATATTTCAGCTGCCCGCCATCGTAGACCGGGGCGGGCAGTCATTTACTAGGGTATATACCAATAATA	NaN
RPL4B_59to88_30snps_2	Randomly_Mutated_Window	AGTTTTCATGAAGATCATGAATACGTTACACTACTATTATTATTGAAAATAATATTTCACAAAGGGGCCGCCCTAGGACTTGTGAGCCAGTCATTTACTAGGGTATATACCAATAATA	4.71825
RPL4B_89to118_30snps_1	Randomly_Mutated_Window	AGTTTTCATGAAGATCATGAATACGTTACACTACTATTATTATTGAAAATAATATTTCTTTCCTATCAGCAATCGCTTACATATTCATGCCGTCAATAGCCCAGGATGGATCCGCCAT	NaN
RPL4B_89to118_30snps_2	Randomly_Mutated_Window	AGTTTTCATGAAGATCATGAATACGTTACACTACTATTATTATTGAAAATAATATTTCTTTCCTATCAGCAATCGCTTACATATTCATCTCACGAAGAGCCTCATCCATAACTCTTAC	8.32669
SUP45_1to28_30snps_1	Randomly_Mutated_Window	TAGTCTGAGCATTAGAGGCAGTATACCTTGTGGCCTTAACGACACCTTTATTTCTTAATTCATTTCGGCTTGTCTCCTTATTAAGACTACAGAAATAGACAAAGGAAATACTTCAATA	7.59482
SUP45_1to28_30snps_2	Randomly_Mutated_Window	TAGACCGAACACCAGCCCGGCGACCACCTGTGGCCTTAACGACACCTTTATTTCTTAATTCATTTCGGCTTGTCTCCTTATTAAGACTACAGAAATAGACAAAGGAAATACTTCAATA	4.61754
SUP45_29to58_30snps_1	Randomly_Mutated_Window	ACTGTATTTTTAACTGATATACTGTTGGATATATGGCCGAACGCATAGGTCCGTGCTTTTCATTTCGGCTTGTCTCCTTATTAAGACTACAGAAATAGACAAAGGAAATACTTCAATA	NaN
SUP45_29to58_30snps_2	Randomly_Mutated_Window	ACTGTATTTTTAACTGATATACTGTTGGCAGCAGGACGGTACATGTAAACCCAGCCTGTTCATTTCGGCTTGTCTCCTTATTAAGACTACAGAAATAGACAAAGGAAATACTTCAATA	6.3838
SUP45_59to88_30snps_1	Randomly_Mutated_Window	ACTGTATTTTTAACTGATATACTGTTGGTGTGGCCTTAACGACACCTTTATTTCTTAACCTTGCCGATAGGTCGAATAGTCCGTCTGCACAGAAATAGACAAAGGAAATACTTCAATA	7.89513
SUP45_59to88_30snps_2	Randomly_Mutated_Window	ACTGTATTTTTAACTGATATACTGTTGGTGTGGCCTTAACGACACCTTTATTTCTTAAGCGGGGCATCAAGCGAGTAGCCAAGGTGTGACAGAAATAGACAAAGGAAATACTTCAATA	NaN
SUP45_89to118_30snps_1	Randomly_Mutated_Window	ACTGTATTTTTAACTGATATACTGTTGGTGTGGCCTTAACGACACCTTTATTTCTTAATTCATTTCGGCTTGTCTCCTTATTAAGACTCTCCCTTGGCTGGGTAATCGGTAGAGCGGT	4.40451
SUP45_89to118_30snps_2	Randomly_Mutated_Window	ACTGTATTTTTAACTGATATACTGTTGGTGTGGCCTTAACGACACCTTTATTTCTTAATTCATTTCGGCTTGTCTCCTTATTAAGACTTTCTTTCCGCTACTGTTTTCGCTGATGGGT	NaN
BGL2_1to28_30snps_1	Randomly_Mutated_Window	TAAACCTACTAGAATAGCGCGTCCGTAATTTCCTCATTCACAATTTGGACTTCTTCTTGTTTTTTTCAATATAAGTTTATTGAGATAGACAACTAACCAAAAAGAAAAACGGTCAAAG	7.85665
BGL2_1to28_30snps_2	Randomly_Mutated_Window	GGCACCTTGCTACATACCGGTCCGCGACTTTCCTCATTCACAATTTGGACTTCTTCTTGTTTTTTTCAATATAAGTTTATTGAGATAGACAACTAACCAAAAAGAAAAACGGTCAAAG	7.52327
BGL2_29to58_30snps_1	Randomly_Mutated_Window	ATTTTAACTGCCTCCTTATAAAGAAACTGCAGAGAGAAATATTGAAAAGAGAACCACCGTTTTTTTCAATATAAGTTTATTGAGATAGACAACTAACCAAAAAGAAAAACGGTCAAAG	9.14325
BGL2_29to58_30snps_2	Randomly_Mutated_Window	ATTTTAACTGCCTCCTTATAAAGAAACTCCCTAGGCGAAGGTGAAGAACGGCAACACAGTTTTTTTCAATATAAGTTTATTGAGATAGACAACTAACCAAAAAGAAAAACGGTCAAAG	8.35431
BGL2_59to88_30snps_1	Randomly_Mutated_Window	ATTTTAACTGCCTCCTTATAAAGAAACTTTTCCTCATTCACAATTTGGACTTCTTCTTTGCACGGGACGGCATGCAGACAGTGACACCACAACTAACCAAAAAGAAAAACGGTCAAAG	8.12713
BGL2_59to88_30snps_2	Randomly_Mutated_Window	ATTTTAACTGCCTCCTTATAAAGAAACTTTTCCTCATTCACAATTTGGACTTCTTCTTCCGGAAGCTCCGCCTGTAGATGATGCTAGAACAACTAACCAAAAAGAAAAACGGTCAAAG	NaN
BGL2_89to118_30snps_1	Randomly_Mutated_Window	ATTTTAACTGCCTCCTTATAAAGAAACTTTTCCTCATTCACAATTTGGACTTCTTCTTGTTTTTTTCAATATAAGTTTATTGAGATAGCAGCTGGGGGCGGGTTCGTTCATCAGTTTT	5.69163
BGL2_89to118_30snps_2	Randomly_Mutated_Window	ATTTTAACTGCCTCCTTATAAAGAAACTTTTCCTCATTCACAATTTGGACTTCTTCTTGTTTTTTTCAATATAAGTTTATTGAGATAGGATGTGGCATGTCTTACGCCCGTTGTCCGT	NaN
ATP7_1to28_30snps_1	Randomly_Mutated_Window	CCGCTCGGCGCACCGGGGCAGTTCGGGTACACGTAACGCAAAAGAACAATCTTAGGATTTAAAAGAAATTTTTCGTGCACTTAATTGCAGAATCACCTAATTATATTTTTGTTCGACT	NaN
ATP7_1to28_30snps_2	Randomly_Mutated_Window	ACAAGACGGCCCCCCCTCCCAGCCTAAAACACGTAACGCAAAAGAACAATCTTAGGATTTAAAAGAAATTTTTCGTGCACTTAATTGCAGAATCACCTAATTATATTTTTGTTCGACT	2.64418
ATP7_29to58_30snps_1	Randomly_Mutated_Window	TTCTATATAAGTTTATATATTCATATTGCGTGCACGTATTCTCTTCTTCCTACGATTATTAAAAGAAATTTTTCGTGCACTTAATTGCAGAATCACCTAATTATATTTTTGTTCGACT	NaN
ATP7_29to58_30snps_2	Randomly_Mutated_Window	TTCTATATAAGTTTATATATTCATATTGTTCAACGCTTGTGGGCTCTCTCTCCTAAGATTAAAAGAAATTTTTCGTGCACTTAATTGCAGAATCACCTAATTATATTTTTGTTCGACT	NaN
ATP7_59to88_30snps_1	Randomly_Mutated_Window	TTCTATATAAGTTTATATATTCATATTGACACGTAACGCAAAAGAACAATCTTAGGATCAGTCCCGCCAAAGGTTCCGGGACTTCGAAAGAATCACCTAATTATATTTTTGTTCGACT	9.10842
ATP7_59to88_30snps_2	Randomly_Mutated_Window	TTCTATATAAGTTTATATATTCATATTGACACGTAACGCAAAAGAACAATCTTAGGATCCTCCTTGGGAACCGTAGATGGACCCGCCTAGAATCACCTAATTATATTTTTGTTCGACT	5.38926
ATP7_89to118_30snps_1	Randomly_Mutated_Window	TTCTATATAAGTTTATATATTCATATTGACACGTAACGCAAAAGAACAATCTTAGGATTTAAAAGAAATTTTTCGTGCACTTAATTGCCATCCATTTGCGAACGGACCGAACGACTGC	18.055
ATP7_89to118_30snps_2	Randomly_Mutated_Window	TTCTATATAAGTTTATATATTCATATTGACACGTAACGCAAAAGAACAATCTTAGGATTTAAAAGAAATTTTTCGTGCACTTAATTGCGACTGGCGGATGCCCGTCCGAAAGCGTCAG	NaN
ADE13_1to28_30snps_1	Randomly_Mutated_Window	GGCCGACCGTATCAAGATTCCGGCGCGGAACCTCTCAAAATTTCTTCCCCAAGGACCAAAGCTTTTCCAGTAAGTTGCTACAACTAAAGTGAAATAAACTATCCGAATTATATAAAAG	2.3189
ADE13_1to28_30snps_2	Randomly_Mutated_Window	TGGCCATCCCGTGAACGTTCCGTCTCAAAACCTCTCAAAATTTCTTCCCCAAGGACCAAAGCTTTTCCAGTAAGTTGCTACAACTAAAGTGAAATAAACTATCCGAATTATATAAAAG	4.01553
ADE13_29to58_30snps_1	Randomly_Mutated_Window	CCATATAAAACAATTATACTTCATCACCGGATGGAACCTGCCGAAGAGAACCATCAGGAAGCTTTTCCAGTAAGTTGCTACAACTAAAGTGAAATAAACTATCCGAATTATATAAAAG	9.13717
ADE13_29to58_30snps_2	Randomly_Mutated_Window	CCATATAAAACAATTATACTTCATCACCCCATATGAGGCTGGCGCGAAATGCTCTAACAAGCTTTTCCAGTAAGTTGCTACAACTAAAGTGAAATAAACTATCCGAATTATATAAAAG	6.28713
ADE13_59to88_30snps_1	Randomly_Mutated_Window	CCATATAAAACAATTATACTTCATCACCAACCTCTCAAAATTTCTTCCCCAAGGACCATGTTGAGAAGTTGGCCAGTAATATTGCTTGGTGAAATAAACTATCCGAATTATATAAAAG	5.17658
ADE13_59to88_30snps_2	Randomly_Mutated_Window	CCATATAAAACAATTATACTTCATCACCAACCTCTCAAAATTTCTTCCCCAAGGACCACGAAAGCAGTCTGGTCAAAAAGGTTGCTTCGTGAAATAAACTATCCGAATTATATAAAAG	8.81474
ADE13_89to118_30snps_1	Randomly_Mutated_Window	CCATATAAAACAATTATACTTCATCACCAACCTCTCAAAATTTCTTCCCCAAGGACCAAAGCTTTTCCAGTAAGTTGCTACAACTAAACACGCTCCGCTCCGAGCGCGGTGCCGCTGC	0.762976
ADE13_89to118_30snps_2	Randomly_Mutated_Window	CCATATAAAACAATTATACTTCATCACCAACCTCTCAAAATTTCTTCCCCAAGGACCAAAGCTTTTCCAGTAAGTTGCTACAACTAAACGCGCTCCGGAAGGGAACCCATACCTGTGT	13.4521
ISU1_1to28_30snps_1	Randomly_Mutated_Window	AAAGAATCTGGACTGATTAGGGCTCCGTTGTTCAGAGATTATTCTTAAATCCATAAGAACATCCCTTCATATAACAATTGAATAAGGAAAACACAACACATAACACATATTTAACCTG	4.83701
ISU1_1to28_30snps_2	Randomly_Mutated_Window	GAAACGGTGCAAGGATATCTACAGAAATTGTTCAGAGATTATTCTTAAATCCATAAGAACATCCCTTCATATAACAATTGAATAAGGAAAACACAACACATAACACATATTTAACCTG	NaN
ISU1_29to58_30snps_1	Randomly_Mutated_Window	TTCCTTCGCTCTTCCGCATATATATTTGCCCCGGAGAGACCGAGGCCCTGTTGCGGACACATCCCTTCATATAACAATTGAATAAGGAAAACACAACACATAACACATATTTAACCTG	8.45563
ISU1_29to58_30snps_2	Randomly_Mutated_Window	TTCCTTCGCTCTTCCGCATATATATTTGGTGGTGCCTCCAGAGTCAGGCCAATACCCCACATCCCTTCATATAACAATTGAATAAGGAAAACACAACACATAACACATATTTAACCTG	3.80939
ISU1_59to88_30snps_1	Randomly_Mutated_Window	TTCCTTCGCTCTTCCGCATATATATTTGTGTTCAGAGATTATTCTTAAATCCATAAGACGGGAGAACGTCGCCTGGTAAACCCTTTTTAAACACAACACATAACACATATTTAACCTG	NaN
ISU1_59to88_30snps_2	Randomly_Mutated_Window	TTCCTTCGCTCTTCCGCATATATATTTGTGTTCAGAGATTATTCTTAAATCCATAAGATAGCTGAAGGCGGGTTTTTGGTCCGTCACCAAACACAACACATAACACATATTTAACCTG	4.52599
ISU1_89to118_30snps_1	Randomly_Mutated_Window	TTCCTTCGCTCTTCCGCATATATATTTGTGTTCAGAGATTATTCTTAAATCCATAAGAACATCCCTTCATATAACAATTGAATAAGGACGGTCTTCATGCGTCATGGGCGCGTGTAGA	NaN
ISU1_89to118_30snps_2	Randomly_Mutated_Window	TTCCTTCGCTCTTCCGCATATATATTTGTGTTCAGAGATTATTCTTAAATCCATAAGAACATCCCTTCATATAACAATTGAATAAGGAGCGTCGCTGGGCACTAGTTGCGGGGGGGCT	4.1185
YMR226C_1to28_30snps_1	Randomly_Mutated_Window	CTCTAATCGCCGCACGGGGCGCCCGCGCAGGAGGATAGATGAAACAGCATGGCGCATAGAAAGTGTTCAAGCTCACTAGTAAAGGCGGGAAATAGAACATTGAGAACGTATTTTGATA	NaN
YMR226C_1to28_30snps_2	Randomly_Mutated_Window	GCAATTTTGTTATCCGCGTCAGCCTCGGAGGAGGATAGATGAAACAGCATGGCGCATAGAAAGTGTTCAAGCTCACTAGTAAAGGCGGGAAATAGAACATTGAGAACGTATTTTGATA	2.68812
YMR226C_29to58_30snps_1	Randomly_Mutated_Window	TATCGGAGCGATATAAAAAGCTGAAGAAGTTTTCTCGTCCATGCAGAAGGACTATCGGGAAAGTGTTCAAGCTCACTAGTAAAGGCGGGAAATAGAACATTGAGAACGTATTTTGATA	17.2236
YMR226C_29to58_30snps_2	Randomly_Mutated_Window	TATCGGAGCGATATAAAAAGCTGAAGAATTATTTCACCTGAGTGTCTGTATCTAGGGCGAAAGTGTTCAAGCTCACTAGTAAAGGCGGGAAATAGAACATTGAGAACGTATTTTGATA	17.311
YMR226C_59to88_30snps_1	Randomly_Mutated_Window	TATCGGAGCGATATAAAAAGCTGAAGAAAGGAGGATAGATGAAACAGCATGGCGCATACTTCCATCCGCGAGCTTGATTACCTTCAAAGAAATAGAACATTGAGAACGTATTTTGATA	15.9016
YMR226C_59to88_30snps_2	Randomly_Mutated_Window	TATCGGAGCGATATAAAAAGCTGAAGAAAGGAGGATAGATGAAACAGCATGGCGCATATCGTTACCCACGTAGATTATTACTTTCGTTGAAATAGAACATTGAGAACGTATTTTGATA	10.5801
YMR226C_89to118_30snps_1	Randomly_Mutated_Window	TATCGGAGCGATATAAAAAGCTGAAGAAAGGAGGATAGATGAAACAGCATGGCGCATAGAAAGTGTTCAAGCTCACTAGTAAAGGCGGACCCCCCCTTGAGCCCGGTCGCACACTTCC	NaN
YMR226C_89to118_30snps_2	Randomly_Mutated_Window	TATCGGAGCGATATAAAAAGCTGAAGAAAGGAGGATAGATGAAACAGCATGGCGCATAGAAAGTGTTCAAGCTCACTAGTAAAGGCGGTGGCCTCGTATGCCTAGCACGTGGAAACCT	NaN
COX12_1to28_30snps_1	Randomly_Mutated_Window	GGACGGATGGGTCGTGCGCCTGCCCCAGAGCAGAGATATACAAATATTTTAGTAAGAATACATAAAGTATCTTTGCTTTCACAAATAGGAACAAGCACATAAATACAGTATAATAGAC	6.46446
COX12_1to28_30snps_2	Randomly_Mutated_Window	TGCTGCTTCGTAGCAACGCGGGTGCGGAAGCAGAGATATACAAATATTTTAGTAAGAATACATAAAGTATCTTTGCTTTCACAAATAGGAACAAGCACATAAATACAGTATAATAGAC	6.84167
COX12_29to58_30snps_1	Randomly_Mutated_Window	CAGATAGAAAAGTTGCATTAAAATGATTGAACAGTTCCCGGCTGACACCGCTCTTTCTTACATAAAGTATCTTTGCTTTCACAAATAGGAACAAGCACATAAATACAGTATAATAGAC	7.0106
COX12_29to58_30snps_2	Randomly_Mutated_Window	CAGATAGAAAAGTTGCATTAAAATGATTGATGACTCGGGTATGCATAACAGAGTTCTGTACATAAAGTATCTTTGCTTTCACAAATAGGAACAAGCACATAAATACAGTATAATAGAC	6.21322
COX12_59to88_30snps_1	Randomly_Mutated_Window	CAGATAGAAAAGTTGCATTAAAATGATTAGCAGAGATATACAAATATTTTAGTAAGAACTGCGCTGCGGCTGCCCAACATCAGTCATTGAACAAGCACATAAATACAGTATAATAGAC	6.13781
COX12_59to88_30snps_2	Randomly_Mutated_Window	CAGATAGAAAAGTTGCATTAAAATGATTAGCAGAGATATACAAATATTTTAGTAAGAAGTTTACCGCCGGGAGCAGAGATTACGGCCCGAACAAGCACATAAATACAGTATAATAGAC	4.90157
COX12_89to118_30snps_1	Randomly_Mutated_Window	CAGATAGAAAAGTTGCATTAAAATGATTAGCAGAGATATACAAATATTTTAGTAAGAATACATAAAGTATCTTTGCTTTCACAAATAGCTGGTGAGCGTACCCCGGCAATCTCCGCCT	4.29884
COX12_89to118_30snps_2	Randomly_Mutated_Window	CAGATAGAAAAGTTGCATTAAAATGATTAGCAGAGATATACAAATATTTTAGTAAGAATACATAAAGTATCTTTGCTTTCACAAATAGTCGAGTCACGGAGTTGCGCCGTGCCCTAGT	6.24508
PFY1_1to28_30snps_1	Randomly_Mutated_Window	AGACGAAGAGAAACTCGTAGACTGGATTCCTTTCTCATTCCCTTCTTAAAACAACTGTGTGATCCTTGAGAAAAGATAAATTACATACACAACATAAACCCAACTACGATCGCAAATT	5.60503
PFY1_1to28_30snps_2	Randomly_Mutated_Window	CAAAAGGCAACAAACCGATGGCCACACTCCTTTCTCATTCCCTTCTTAAAACAACTGTGTGATCCTTGAGAAAAGATAAATTACATACACAACATAAACCCAACTACGATCGCAAATT	7.83805
PFY1_29to58_30snps_1	Randomly_Mutated_Window	TTTTTTTTCTTTTTAAAGCTCAGTTGACAGGGCACGCGCTGAGCGGGCTTCGCCAAAAGTGATCCTTGAGAAAAGATAAATTACATACACAACATAAACCCAACTACGATCGCAAATT	4.25929
PFY1_29to58_30snps_2	Randomly_Mutated_Window	TTTTTTTTCTTTTTAAAGCTCAGTTGACAGGGCACATCAGTAGAGCGCGCTTGTGGACGTGATCCTTGAGAAAAGATAAATTACATACACAACATAAACCCAACTACGATCGCAAATT	NaN
PFY1_59to88_30snps_1	Randomly_Mutated_Window	TTTTTTTTCTTTTTAAAGCTCAGTTGACCCTTTCTCATTCCCTTCTTAAAACAACTGTAAAGCGTCAACCTCTCCGCGTGGATGTCGTACAACATAAACCCAACTACGATCGCAAATT	NaN
PFY1_59to88_30snps_2	Randomly_Mutated_Window	TTTTTTTTCTTTTTAAAGCTCAGTTGACCCTTTCTCATTCCCTTCTTAAAACAACTGTTGATCTAGAATTTCCGTTAGGTAGGGGGCTACAACATAAACCCAACTACGATCGCAAATT	9.15579
PFY1_89to118_30snps_1	Randomly_Mutated_Window	TTTTTTTTCTTTTTAAAGCTCAGTTGACCCTTTCTCATTCCCTTCTTAAAACAACTGTGTGATCCTTGAGAAAAGATAAATTACATACGAGTTTGGTTGGGTGAATGAGGAAACTCGA	NaN
PFY1_89to118_30snps_2	Randomly_Mutated_Window	TTTTTTTTCTTTTTAAAGCTCAGTTGACCCTTTCTCATTCCCTTCTTAAAACAACTGTGTGATCCTTGAGAAAAGATAAATTACATACTTGGGTAGGTGTGTCACTAATAGCTCCGCC	7.0469
DLD3_1to28_30snps_1	Randomly_Mutated_Window	CACTGGGCCGTCGCTAGGTGTCACCGGGTAACTGACGAGGCAGAACAGGGTGCCAAAATGCTCCTCAATATTTTATTCATTTGAGATTCAAGGCTTAAAGACAGCATATATAAGAATT	3.7827
DLD3_1to28_30snps_2	Randomly_Mutated_Window	CTCTACGGATGAGCCGGTAGTTGCCGAGTAACTGACGAGGCAGAACAGGGTGCCAAAATGCTCCTCAATATTTTATTCATTTGAGATTCAAGGCTTAAAGACAGCATATATAAGAATT	3.26231
DLD3_29to58_30snps_1	Randomly_Mutated_Window	TGAGTATATAAGTGATCACTCGCTTATAATTAAACACTCCGGCGGGGTATGTAATCGTTGCTCCTCAATATTTTATTCATTTGAGATTCAAGGCTTAAAGACAGCATATATAAGAATT	10.9911
DLD3_29to58_30snps_2	Randomly_Mutated_Window	TGAGTATATAAGTGATCACTCGCTTATAGCCAGTCGCTCAATAGGTGACCAAGACTCGTGCTCCTCAATATTTTATTCATTTGAGATTCAAGGCTTAAAGACAGCATATATAAGAATT	NaN
DLD3_59to88_30snps_1	Randomly_Mutated_Window	TGAGTATATAAGTGATCACTCGCTTATATAACTGACGAGGCAGAACAGGGTGCCAAAAATACGAAGCTATCAAGCCGTCGCAAGATAGCAAGGCTTAAAGACAGCATATATAAGAATT	6.01387
DLD3_59to88_30snps_2	Randomly_Mutated_Window	TGAGTATATAAGTGATCACTCGCTTATATAACTGACGAGGCAGAACAGGGTGCCAAAAGCTCAGCGGTGGCAGACGAGTCGGTGTGGCCAAGGCTTAAAGACAGCATATATAAGAATT	NaN
DLD3_89to118_30snps_1	Randomly_Mutated_Window	TGAGTATATAAGTGATCACTCGCTTATATAACTGACGAGGCAGAACAGGGTGCCAAAATGCTCCTCAATATTTTATTCATTTGAGATTACTCTGCCTGCAGAGCACACGCCCTCCTGG	NaN
DLD3_89to118_30snps_2	Randomly_Mutated_Window	TGAGTATATAAGTGATCACTCGCTTATATAACTGACGAGGCAGAACAGGGTGCCAAAATGCTCCTCAATATTTTATTCATTTGAGATTGGTAAGCCGGGACGTTGTATGTGTGCCTCG	NaN
GRE3_1to28_30snps_1	Randomly_Mutated_Window	TCTACTTGTACTGTCCATGTCAATTCGGAGAAGCAAATAGTTGTCAGTGCAATCCTTCAAGACGATTGGGAAAATACTGTAATATAAATCGTAAAGGAAAATTGGAAATTTTTTAAAG	4.74587
GRE3_1to28_30snps_2	Randomly_Mutated_Window	TCTAGGGCGGATGTGCGGGGTAAATCCAAGAAGCAAATAGTTGTCAGTGCAATCCTTCAAGACGATTGGGAAAATACTGTAATATAAATCGTAAAGGAAAATTGGAAATTTTTTAAAG	2.05321
GRE3_29to58_30snps_1	Randomly_Mutated_Window	CTGGTACACTGAAGTATATAAGGGATATGCGGTATCCATCCCTAGGAGCGGCGGAAAGAAGACGATTGGGAAAATACTGTAATATAAATCGTAAAGGAAAATTGGAAATTTTTTAAAG	0.1399
GRE3_29to58_30snps_2	Randomly_Mutated_Window	CTGGTACACTGAAGTATATAAGGGATATCATCCTCCCCCAGACCAGCGCTCGAGTAGTAAGACGATTGGGAAAATACTGTAATATAAATCGTAAAGGAAAATTGGAAATTTTTTAAAG	NaN
GRE3_59to88_30snps_1	Randomly_Mutated_Window	CTGGTACACTGAAGTATATAAGGGATATAGAAGCAAATAGTTGTCAGTGCAATCCTTCGGCTACGGCCTTCCCTGGTGCGGGCTAGCGTCGTAAAGGAAAATTGGAAATTTTTTAAAG	5.28995
GRE3_59to88_30snps_2	Randomly_Mutated_Window	CTGGTACACTGAAGTATATAAGGGATATAGAAGCAAATAGTTGTCAGTGCAATCCTTCCCACGACGCCTATGCTACTCTATGATGTGTTCGTAAAGGAAAATTGGAAATTTTTTAAAG	5.41289
GRE3_89to118_30snps_1	Randomly_Mutated_Window	CTGGTACACTGAAGTATATAAGGGATATAGAAGCAAATAGTTGTCAGTGCAATCCTTCAAGACGATTGGGAAAATACTGTAATATAAAAACACGGTTTCTTACAACGCCCCGGCTGCC	9.17791
GRE3_89to118_30snps_2	Randomly_Mutated_Window	CTGGTACACTGAAGTATATAAGGGATATAGAAGCAAATAGTTGTCAGTGCAATCCTTCAAGACGATTGGGAAAATACTGTAATATAAAAGCATTGCAGCCCGATTGCTCAGGCCTTTC	10.5228
KGD2_1to28_30snps_1	Randomly_Mutated_Window	CTCGTGTCGGGTAATGATAGCTACCGCAGGTATATATCAGTGAATAGATATATTGTTATAAACTTCACTACCACATTTGTTACAACCAAAGACACAACTTCAGATAATTATTTAAACA	6.45537
KGD2_1to28_30snps_2	Randomly_Mutated_Window	TCGCTTCTGCGTAATGTAATAGCGAGGGGGTATATATCAGTGAATAGATATATTGTTATAAACTTCACTACCACATTTGTTACAACCAAAGACACAACTTCAGATAATTATTTAAACA	6.80329
KGD2_29to58_30snps_1	Randomly_Mutated_Window	AATAAAAAATTAGGCAGCTATCTTTAACTTGTGCCGAATAACCCATACGTACGCAAATTAAACTTCACTACCACATTTGTTACAACCAAAGACACAACTTCAGATAATTATTTAAACA	6.22457
KGD2_29to58_30snps_2	Randomly_Mutated_Window	AATAAAAAATTAGGCAGCTATCTTTAACTTGGACAGGACTGTTCGTCTGGATGGCGGTTAAACTTCACTACCACATTTGTTACAACCAAAGACACAACTTCAGATAATTATTTAAACA	6.28331
KGD2_59to88_30snps_1	Randomly_Mutated_Window	AATAAAAAATTAGGCAGCTATCTTTAACGGTATATATCAGTGAATAGATATATTGTTAATGGAGGTCAAGTATGGCACAAGCTCGGTCAAGACACAACTTCAGATAATTATTTAAACA	4.36262
KGD2_59to88_30snps_2	Randomly_Mutated_Window	AATAAAAAATTAGGCAGCTATCTTTAACGGTATATATCAGTGAATAGATATATTGTTACGCGGCCTGTCTGTGAGGGGCAAGACCGACAAGACACAACTTCAGATAATTATTTAAACA	NaN
KGD2_89to118_30snps_1	Randomly_Mutated_Window	AATAAAAAATTAGGCAGCTATCTTTAACGGTATATATCAGTGAATAGATATATTGTTATAAACTTCACTACCACATTTGTTACAACCAGGCCATGTTTCCGGTTACTCGGAAACGGTT	NaN
KGD2_89to118_30snps_2	Randomly_Mutated_Window	AATAAAAAATTAGGCAGCTATCTTTAACGGTATATATCAGTGAATAGATATATTGTTATAAACTTCACTACCACATTTGTTACAACCAGTACGTTCCGAGAGACCGCCATAAGTGGTG	NaN
ATP17_1to28_30snps_1	Randomly_Mutated_Window	AATCCCGTCAGCGGGTCGCTTCTTAAGGTTTCTAGGGCAAGAAAAGACATTGTTGAAATTGTTCCAGAAACTTTCATTTAAAGTCTTTCGTGAAAGGAGTGGACGTCAAAAAGAAATA	5.52943
ATP17_1to28_30snps_2	Randomly_Mutated_Window	GGTCAGCCCACGCCGTCGCGCTGTGGTCTTTCTAGGGCAAGAAAAGACATTGTTGAAATTGTTCCAGAAACTTTCATTTAAAGTCTTTCGTGAAAGGAGTGGACGTCAAAAAGAAATA	3.43915
ATP17_29to58_30snps_1	Randomly_Mutated_Window	CCATTTTGATTATAAAGAAAGGCATTATGAGGGTTTTACGCCGTGCTGTACTCCACTTTTGTTCCAGAAACTTTCATTTAAAGTCTTTCGTGAAAGGAGTGGACGTCAAAAAGAAATA	6.97752
ATP17_29to58_30snps_2	Randomly_Mutated_Window	CCATTTTGATTATAAAGAAAGGCATTATCGCACTCTAGTCCTTGTCCTTAGAAGCCTCTTGTTCCAGAAACTTTCATTTAAAGTCTTTCGTGAAAGGAGTGGACGTCAAAAAGAAATA	10.0575
ATP17_59to88_30snps_1	Randomly_Mutated_Window	CCATTTTGATTATAAAGAAAGGCATTATTTTCTAGGGCAAGAAAAGACATTGTTGAAAGGCGATAGTCCGACCGACCGGTGTTAGCCACGTGAAAGGAGTGGACGTCAAAAAGAAATA	5.29256
ATP17_59to88_30snps_2	Randomly_Mutated_Window	CCATTTTGATTATAAAGAAAGGCATTATTTTCTAGGGCAAGAAAAGACATTGTTGAAAAAAAATACTTGGGGACACAACGCCACTCGACGTGAAAGGAGTGGACGTCAAAAAGAAATA	4.34942
ATP17_89to118_30snps_1	Randomly_Mutated_Window	CCATTTTGATTATAAAGAAAGGCATTATTTTCTAGGGCAAGAAAAGACATTGTTGAAATTGTTCCAGAAACTTTCATTTAAAGTCTTTGAAATGCTCCTCCTGTTAGCGTGTACCTAG	NaN
ATP17_89to118_30snps_2	Randomly_Mutated_Window	CCATTTTGATTATAAAGAAAGGCATTATTTTCTAGGGCAAGAAAAGACATTGTTGAAATTGTTCCAGAAACTTTCATTTAAAGTCTTTGCGTCGTTATTCTCCACAACTCTTACGCAG	7.70859
PRE2_1to28_30snps_1	Randomly_Mutated_Window	TTTACAGCGATCCTTTGCGACTGGGCCCATATCAATTTTCAAAAGAGAATAACAAATTTACTATTAAATTGAATAGATAGAAAGAAACCAGAAAGAAAAGAAGGAAAAAAAAACAAAC	NaN
PRE2_1to28_30snps_2	Randomly_Mutated_Window	TGCTACTCCCTCTGCCTGGCAGCAACTCATATCAATTTTCAAAAGAGAATAACAAATTTACTATTAAATTGAATAGATAGAAAGAAACCAGAAAGAAAAGAAGGAAAAAAAAACAAAC	NaN
PRE2_29to58_30snps_1	Randomly_Mutated_Window	AAGGTGAATTGTAAAGAAAGGCTTCAATCAGAAGGCCCAATTTGTCCCCGTTGTCTGATACTATTAAATTGAATAGATAGAAAGAAACCAGAAAGAAAAGAAGGAAAAAAAAACAAAC	NaN
PRE2_29to58_30snps_2	Randomly_Mutated_Window	AAGGTGAATTGTAAAGAAAGGCTTCAATTAGAATTAGGATTCTTACAGGGGGAGCTGGTACTATTAAATTGAATAGATAGAAAGAAACCAGAAAGAAAAGAAGGAAAAAAAAACAAAC	NaN
PRE2_59to88_30snps_1	Randomly_Mutated_Window	AAGGTGAATTGTAAAGAAAGGCTTCAATATATCAATTTTCAAAAGAGAATAACAAATTCGAGCCACCCGGCGTGTTCCGCTGGCCCCTCAGAAAGAAAAGAAGGAAAAAAAAACAAAC	3.42792
PRE2_59to88_30snps_2	Randomly_Mutated_Window	AAGGTGAATTGTAAAGAAAGGCTTCAATATATCAATTTTCAAAAGAGAATAACAAATTGCTGTAAGGGGCATTACTGCCAGGTCCCCGCAGAAAGAAAAGAAGGAAAAAAAAACAAAC	4.17079
PRE2_89to118_30snps_1	Randomly_Mutated_Window	AAGGTGAATTGTAAAGAAAGGCTTCAATATATCAATTTTCAAAAGAGAATAACAAATTTACTATTAAATTGAATAGATAGAAAGAAACAGAGGCACGCTAGGCACCCCTTGGTATGCG	NaN
PRE2_89to118_30snps_2	Randomly_Mutated_Window	AAGGTGAATTGTAAAGAAAGGCTTCAATATATCAATTTTCAAAAGAGAATAACAAATTTACTATTAAATTGAATAGATAGAAAGAAACTGTTCGTGTGCTGGTTCCCCCCTGCTGCTT	6.7945
COX7_1to28_30snps_1	Randomly_Mutated_Window	ATTCCCCAATCTTTAGACCGGCTTTCTCAAGATGATATTATTTATTCATCCCATGAATAGTAGAACTCGATATAAGATTCTAAACCAACAAGTACAGAAAGCAAAACAATAATAAATA	9.52742
COX7_1to28_30snps_2	Randomly_Mutated_Window	AGTATCCAAGCTTTCTTCTACAGGCAGCAAGATGATATTATTTATTCATCCCATGAATAGTAGAACTCGATATAAGATTCTAAACCAACAAGTACAGAAAGCAAAACAATAATAAATA	8.97678
COX7_29to58_30snps_1	Randomly_Mutated_Window	GCAGGTTTGAAAAGGCGGATAGAAATAATCAGACCACGATCCCTAAATAGTACCAGTCAGTAGAACTCGATATAAGATTCTAAACCAACAAGTACAGAAAGCAAAACAATAATAAATA	8.78516
COX7_29to58_30snps_2	Randomly_Mutated_Window	GCAGGTTTGAAAAGGCGGATAGAAATAATTCCCAGCGCCTGGGGGGTGCTATCACTGCAGTAGAACTCGATATAAGATTCTAAACCAACAAGTACAGAAAGCAAAACAATAATAAATA	NaN
COX7_59to88_30snps_1	Randomly_Mutated_Window	GCAGGTTTGAAAAGGCGGATAGAAATAAAAGATGATATTATTTATTCATCCCATGAATTCGCCTCGCGACAGCCGTCAGGAGCTGTTCCAAGTACAGAAAGCAAAACAATAATAAATA	6.5831
COX7_59to88_30snps_2	Randomly_Mutated_Window	GCAGGTTTGAAAAGGCGGATAGAAATAAAAGATGATATTATTTATTCATCCCATGAATCAGGCTTTAGAGATGGGTCGATCGGGGGCGCAAGTACAGAAAGCAAAACAATAATAAATA	5.65488
COX7_89to118_30snps_1	Randomly_Mutated_Window	GCAGGTTTGAAAAGGCGGATAGAAATAAAAGATGATATTATTTATTCATCCCATGAATAGTAGAACTCGATATAAGATTCTAAACCAATCTCACGCCCCGCGTCCTTGTACGCTGCCG	3.40087
COX7_89to118_30snps_2	Randomly_Mutated_Window	GCAGGTTTGAAAAGGCGGATAGAAATAAAAGATGATATTATTTATTCATCCCATGAATAGTAGAACTCGATATAAGATTCTAAACCAAAGTCCGGGCTGTCAGGGGGCTGCTATTGAG	7.25913
RPL9B_1to28_30snps_1	Randomly_Mutated_Window	TCCCGACAAGGGTTGGCCATGGGGGAAATTCCCTTTACCTATTCTCTTTTTGAAATAGTTCATTTTCTCTCTCTGAAACGACAATAAACCAAACTCTAGCCTCCAATAGTCACTAAAG	5.70064
RPL9B_1to28_30snps_2	Randomly_Mutated_Window	GTCCGGCAGCGATGGGGCGGATAAGTAGTTCCCTTTACCTATTCTCTTTTTGAAATAGTTCATTTTCTCTCTCTGAAACGACAATAAACCAAACTCTAGCCTCCAATAGTCACTAAAG	7.34002
RPL9B_29to58_30snps_1	Randomly_Mutated_Window	AAAATTACCAACCATATTTCTATTTCCTGCTGTAGACGAGTAGAGGCGAACTTGTCGCTTCATTTTCTCTCTCTGAAACGACAATAAACCAAACTCTAGCCTCCAATAGTCACTAAAG	4.98543
RPL9B_29to58_30snps_2	Randomly_Mutated_Window	AAAATTACCAACCATATTTCTATTTCCTCCTATCAACTGCGGCGGTGAGCGTTTTGCATTCATTTTCTCTCTCTGAAACGACAATAAACCAAACTCTAGCCTCCAATAGTCACTAAAG	6.63316
RPL9B_59to88_30snps_1	Randomly_Mutated_Window	AAAATTACCAACCATATTTCTATTTCCTTTCCCTTTACCTATTCTCTTTTTGAAATAGCAGCCCCCTCGCGGTGCCTCAACTTTACTTCCAAACTCTAGCCTCCAATAGTCACTAAAG	6.98681
RPL9B_59to88_30snps_2	Randomly_Mutated_Window	AAAATTACCAACCATATTTCTATTTCCTTTCCCTTTACCTATTCTCTTTTTGAAATAGGCTCCCCGTCGAGGGCTTGGGAGGCGGTTTCCAAACTCTAGCCTCCAATAGTCACTAAAG	4.27747
RPL9B_89to118_30snps_1	Randomly_Mutated_Window	AAAATTACCAACCATATTTCTATTTCCTTTCCCTTTACCTATTCTCTTTTTGAAATAGTTCATTTTCTCTCTCTGAAACGACAATAAAGGGTCAAGATAAGATACTATACAGGCTTCA	NaN
RPL9B_89to118_30snps_2	Randomly_Mutated_Window	AAAATTACCAACCATATTTCTATTTCCTTTCCCTTTACCTATTCTCTTTTTGAAATAGTTCATTTTCTCTCTCTGAAACGACAATAAAAGGGCTAGAGTTGAGACGCCACAGAGGTTC	7.3261
MRS11_1to28_30snps_1	Randomly_Mutated_Window	GTTAAAATTACGGGTAGTCGTCCAGTCATCTCTAAAGAACTATTACTCTCCTCGTTCCCCTCTCATGTCTTTTAACAGATAAACAAGCAAAAGAAGGAACTATCATACTTAGAAAAAC	8.01601
MRS11_1to28_30snps_2	Randomly_Mutated_Window	CCAAACGTACCTCGCCCACGATTATCCTTCTCTAAAGAACTATTACTCTCCTCGTTCCCCTCTCATGTCTTTTAACAGATAAACAAGCAAAAGAAGGAACTATCATACTTAGAAAAAC	6.94665
MRS11_29to58_30snps_1	Randomly_Mutated_Window	AGCTGGCAGTGAACGTACAAGAGCAAGCGTGAGCCCCCGGGCGCGACAAAGATCAAGACCTCTCATGTCTTTTAACAGATAAACAAGCAAAAGAAGGAACTATCATACTTAGAAAAAC	5.97526
MRS11_29to58_30snps_2	Randomly_Mutated_Window	AGCTGGCAGTGAACGTACAAGAGCAAGCGACAACGGCTTGCTAATTAGCATGGTAGGACCTCTCATGTCTTTTAACAGATAAACAAGCAAAAGAAGGAACTATCATACTTAGAAAAAC	6.65269
MRS11_59to88_30snps_1	Randomly_Mutated_Window	AGCTGGCAGTGAACGTACAAGAGCAAGCTCTCTAAAGAACTATTACTCTCCTCGTTCCGTGAAGGGCGTAAAGTCTCCGCGTGAGGCGAAAAGAAGGAACTATCATACTTAGAAAAAC	3.09167
MRS11_59to88_30snps_2	Randomly_Mutated_Window	AGCTGGCAGTGAACGTACAAGAGCAAGCTCTCTAAAGAACTATTACTCTCCTCGTTCCGAAACTCCCATGGGAGTGTTCGTCGTTCATAAAAGAAGGAACTATCATACTTAGAAAAAC	NaN
MRS11_89to118_30snps_1	Randomly_Mutated_Window	AGCTGGCAGTGAACGTACAAGAGCAAGCTCTCTAAAGAACTATTACTCTCCTCGTTCCCCTCTCATGTCTTTTAACAGATAAACAAGCGGCTCTTACCGGAGGGCCGTGGTCGTGCCG	0.470989
MRS11_89to118_30snps_2	Randomly_Mutated_Window	AGCTGGCAGTGAACGTACAAGAGCAAGCTCTCTAAAGAACTATTACTCTCCTCGTTCCCCTCTCATGTCTTTTAACAGATAAACAAGCGGCCCGTCTCTTCCCACCCAGACCCCTGTA	1.64944
ATP14_1to28_30snps_1	Randomly_Mutated_Window	CTCCGTTGTTGAGCGGATAGTTGGAGATTAAGGAAGGGGTGTTAACTTATATACAGGTTCATCTACCAGTCACCAGTCCATACAAACTTGAACCGTCTGCGTACCAGTCCTAATCAAA	6.78108
ATP14_1to28_30snps_2	Randomly_Mutated_Window	GGCTCGGCGTGTATGCCTCTTTTACGCGTAAGGAAGGGGTGTTAACTTATATACAGGTTCATCTACCAGTCACCAGTCCATACAAACTTGAACCGTCTGCGTACCAGTCCTAATCAAA	4.0404
ATP14_29to58_30snps_1	Randomly_Mutated_Window	AAAAAAAAAACCCACTGCTCAGATGTTAGGGACGCAACAGAGACTAAGTGTCCGTTCGTCATCTACCAGTCACCAGTCCATACAAACTTGAACCGTCTGCGTACCAGTCCTAATCAAA	3.55769
ATP14_29to58_30snps_2	Randomly_Mutated_Window	AAAAAAAAAACCCACTGCTCAGATGTTAGTTATGGACCTCACCTCAGGCCCGCATCCCTCATCTACCAGTCACCAGTCCATACAAACTTGAACCGTCTGCGTACCAGTCCTAATCAAA	3.73581
ATP14_59to88_30snps_1	Randomly_Mutated_Window	AAAAAAAAAACCCACTGCTCAGATGTTATAAGGAAGGGGTGTTAACTTATATACAGGTAGTGGCGGATAGTCAGCACATTCCTGCTAATGAACCGTCTGCGTACCAGTCCTAATCAAA	3.08324
ATP14_59to88_30snps_2	Randomly_Mutated_Window	AAAAAAAAAACCCACTGCTCAGATGTTATAAGGAAGGGGTGTTAACTTATATACAGGTGAGGGGTTTGTGAGTGCTCGGGGCGCCCGCTGAACCGTCTGCGTACCAGTCCTAATCAAA	2.44244
ATP14_89to118_30snps_1	Randomly_Mutated_Window	AAAAAAAAAACCCACTGCTCAGATGTTATAAGGAAGGGGTGTTAACTTATATACAGGTTCATCTACCAGTCACCAGTCCATACAAACTATTGTGTAACATCCGGGTACATATGATTCT	NaN
ATP14_89to118_30snps_2	Randomly_Mutated_Window	AAAAAAAAAACCCACTGCTCAGATGTTATAAGGAAGGGGTGTTAACTTATATACAGGTTCATCTACCAGTCACCAGTCCATACAAACTGACCGTTGAGTGAGCATTAATTCGCCAGGC	5.77374
COX13_1to28_30snps_1	Randomly_Mutated_Window	CACCTGAGCCGCCTTCTTGGAATAAATTCGTTTTCACTACACATCGCATGTGTTTTATCTAGATTTAAAATCATATTACTACAGTTCTACAGTTATACAAATAACAAACAATAGAAAA	8.81983
COX13_1to28_30snps_2	Randomly_Mutated_Window	CGCCTTGTCTATGGTGACCCTTAGCTCGCGTTTTCACTACACATCGCATGTGTTTTATCTAGATTTAAAATCATATTACTACAGTTCTACAGTTATACAAATAACAAACAATAGAAAA	5.86639
COX13_29to58_30snps_1	Randomly_Mutated_Window	ATATAACAAACATACACGTTGCCTTGAAATAAGCACAGGAGTGCACGTGCATAAAACACTAGATTTAAAATCATATTACTACAGTTCTACAGTTATACAAATAACAAACAATAGAAAA	8.14084
COX13_29to58_30snps_2	Randomly_Mutated_Window	ATATAACAAACATACACGTTGCCTTGAAGTCCAAATAGGGGTGAACGTCTAAGACCGGCTAGATTTAAAATCATATTACTACAGTTCTACAGTTATACAAATAACAAACAATAGAAAA	6.97811
COX13_59to88_30snps_1	Randomly_Mutated_Window	ATATAACAAACATACACGTTGCCTTGAACGTTTTCACTACACATCGCATGTGTTTTATAGCTTGACGCCCCTCCGCGGTGCTCCCGGGACAGTTATACAAATAACAAACAATAGAAAA	3.75528
COX13_59to88_30snps_2	Randomly_Mutated_Window	ATATAACAAACATACACGTTGCCTTGAACGTTTTCACTACACATCGCATGTGTTTTATGGGACCCACGGTGGCACGGGAGTGTTGAGCACAGTTATACAAATAACAAACAATAGAAAA	5.53178
COX13_89to118_30snps_1	Randomly_Mutated_Window	ATATAACAAACATACACGTTGCCTTGAACGTTTTCACTACACATCGCATGTGTTTTATCTAGATTTAAAATCATATTACTACAGTTCTGTGAAATGCGGCCAGTACCGACCACATCCG	NaN
COX13_89to118_30snps_2	Randomly_Mutated_Window	ATATAACAAACATACACGTTGCCTTGAACGTTTTCACTACACATCGCATGTGTTTTATCTAGATTTAAAATCATATTACTACAGTTCTTGTTCACCGTCTTGTCGCGCTGGCGTTTTT	3.84219
ATP4_1to28_30snps_1	Randomly_Mutated_Window	CTTCCCGCGTTGAAGGACGGATGCGAGCTGTTGACAAGTTTATACTGTGCTAGGAAGGGTTATATTTTATTAAAAGACTGACGAGAATTCAGTACCTCCTAAGTGCGCAAGAGATAAA	3.88951
ATP4_1to28_30snps_2	Randomly_Mutated_Window	GCAATACTCGTACTGCCAGCTATCGACCTGTTGACAAGTTTATACTGTGCTAGGAAGGGTTATATTTTATTAAAAGACTGACGAGAATTCAGTACCTCCTAAGTGCGCAAGAGATAAA	NaN
ATP4_29to58_30snps_1	Randomly_Mutated_Window	AGGGATTATAATTGCAGTTAGCAGTTTACACCCTTGTCGGCCACGATGCTATCCGCACGTTATATTTTATTAAAAGACTGACGAGAATTCAGTACCTCCTAAGTGCGCAAGAGATAAA	5.6594
ATP4_29to58_30snps_2	Randomly_Mutated_Window	AGGGATTATAATTGCAGTTAGCAGTTTACCAGTGTTTCCACTACACTACTACATTCACGTTATATTTTATTAAAAGACTGACGAGAATTCAGTACCTCCTAAGTGCGCAAGAGATAAA	7.95227
ATP4_59to88_30snps_1	Randomly_Mutated_Window	AGGGATTATAATTGCAGTTAGCAGTTTATGTTGACAAGTTTATACTGTGCTAGGAAGGCGGTGTCGCCGGAGTTGTCAGTGGATTCCCTCAGTACCTCCTAAGTGCGCAAGAGATAAA	NaN
ATP4_59to88_30snps_2	Randomly_Mutated_Window	AGGGATTATAATTGCAGTTAGCAGTTTATGTTGACAAGTTTATACTGTGCTAGGAAGGAAGCCCGCCGGGCCCTGTGAATTACGAGCCTCAGTACCTCCTAAGTGCGCAAGAGATAAA	0.231151
ATP4_89to118_30snps_1	Randomly_Mutated_Window	AGGGATTATAATTGCAGTTAGCAGTTTATGTTGACAAGTTTATACTGTGCTAGGAAGGGTTATATTTTATTAAAAGACTGACGAGAATAGTCGCTACTACTCCCAGATCTCTAGGGGG	3.53028
ATP4_89to118_30snps_2	Randomly_Mutated_Window	AGGGATTATAATTGCAGTTAGCAGTTTATGTTGACAAGTTTATACTGTGCTAGGAAGGGTTATATTTTATTAAAAGACTGACGAGAATGGGTATTTATTCCTCACATAGCCGACCGCG	1.79349
RPL35B_1to28_30snps_1	Randomly_Mutated_Window	AGCGATGTCCTGGCACCTCGGGCGGCGTAAATGGATATATTGAAAATCTACTCACATCTCTTTTTTGGGGGTTTGGTAGTACAGTGAGAACACGATAAAGAACCAAATAGGACTAAAA	4.60845
RPL35B_1to28_30snps_2	Randomly_Mutated_Window	AGCCTTTTATATTCATCAGCACACCCCAAAATGGATATATTGAAAATCTACTCACATCTCTTTTTTGGGGGTTTGGTAGTACAGTGAGAACACGATAAAGAACCAAATAGGACTAAAA	6.47075
RPL35B_29to58_30snps_1	Randomly_Mutated_Window	TAGAGGCCTGCAATCGTCATCATATGAGTCTGTACATGTACTCCGCGACTTCGGTGAATCTTTTTTGGGGGTTTGGTAGTACAGTGAGAACACGATAAAGAACCAAATAGGACTAAAA	4.50654
RPL35B_29to58_30snps_2	Randomly_Mutated_Window	TAGAGGCCTGCAATCGTCATCATATGAGTGGATTTACGGACCCGCGCAATAAACGTAGTCTTTTTTGGGGGTTTGGTAGTACAGTGAGAACACGATAAAGAACCAAATAGGACTAAAA	3.76428
RPL35B_59to88_30snps_1	Randomly_Mutated_Window	TAGAGGCCTGCAATCGTCATCATATGAGAAATGGATATATTGAAAATCTACTCACATCGAGAGCAGAATCCCGGTCCGAGTATACTGCAACACGATAAAGAACCAAATAGGACTAAAA	6.15242
RPL35B_59to88_30snps_2	Randomly_Mutated_Window	TAGAGGCCTGCAATCGTCATCATATGAGAAATGGATATATTGAAAATCTACTCACATCATACGCCCCCCTACAGTTGGTGGAGAATTAAACACGATAAAGAACCAAATAGGACTAAAA	6.41186
RPL35B_89to118_30snps_1	Randomly_Mutated_Window	TAGAGGCCTGCAATCGTCATCATATGAGAAATGGATATATTGAAAATCTACTCACATCTCTTTTTTGGGGGTTTGGTAGTACAGTGAGTCAGTATCGGCTTTAGCTTCGTCTAGCGCT	5.34946
RPL35B_89to118_30snps_2	Randomly_Mutated_Window	TAGAGGCCTGCAATCGTCATCATATGAGAAATGGATATATTGAAAATCTACTCACATCTCTTTTTTGGGGGTTTGGTAGTACAGTGAGCCGCATCGCCCCGTGGCGCCTTCTAGCTGC	1.35075
VPS21_1to28_30snps_1	Randomly_Mutated_Window	CAGTGTCCTTGGCATACCAACTGGATATTTATAAAAGTGGCAACGATTTTAAAAATAAAAAGCAAGATCGTCGACTTATCTAAGCTATAAAAAAATATCCCTTTTATCACACAAAAAA	8.81205
VPS21_1to28_30snps_2	Randomly_Mutated_Window	CCCTGTACCCCTTCGGTCTAGAAGAGGGTTATAAAAGTGGCAACGATTTTAAAAATAAAAAGCAAGATCGTCGACTTATCTAAGCTATAAAAAAATATCCCTTTTATCACACAAAAAA	11.2865
VPS21_29to58_30snps_1	Randomly_Mutated_Window	AGTGAGGTGAAAATACGAGCAGCTTATCAGCCCTGTCCCAGCGAAGAAGCCCTTTCTCAAAGCAAGATCGTCGACTTATCTAAGCTATAAAAAAATATCCCTTTTATCACACAAAAAA	6.02122
VPS21_29to58_30snps_2	Randomly_Mutated_Window	AGTGAGGTGAAAATACGAGCAGCTTATCCGGAGGGTACAATGGTCGAAGGTGCGCAGCAAAGCAAGATCGTCGACTTATCTAAGCTATAAAAAAATATCCCTTTTATCACACAAAAAA	4.33714
VPS21_59to88_30snps_1	Randomly_Mutated_Window	AGTGAGGTGAAAATACGAGCAGCTTATCTTATAAAAGTGGCAACGATTTTAAAAATAATCGTTCTTGGGAGTACAGCCCAGTGTGGCCAAAAAAATATCCCTTTTATCACACAAAAAA	8.01408
VPS21_59to88_30snps_2	Randomly_Mutated_Window	AGTGAGGTGAAAATACGAGCAGCTTATCTTATAAAAGTGGCAACGATTTTAAAAATAAGCCCGCGACGGCAGACTGCGCTATGAACCAAAAAAAATATCCCTTTTATCACACAAAAAA	NaN
VPS21_89to118_30snps_1	Randomly_Mutated_Window	AGTGAGGTGAAAATACGAGCAGCTTATCTTATAAAAGTGGCAACGATTTTAAAAATAAAAAGCAAGATCGTCGACTTATCTAAGCTATTCTCTCTATCAAGCAGGCGAGGCGCCCTTC	8.25599
VPS21_89to118_30snps_2	Randomly_Mutated_Window	AGTGAGGTGAAAATACGAGCAGCTTATCTTATAAAAGTGGCAACGATTTTAAAAATAAAAAGCAAGATCGTCGACTTATCTAAGCTATGTCGTTTATCAAACGCACCGCTCTTCGCGG	2.56848
AAT2_1to28_30snps_1	Randomly_Mutated_Window	GGACCCAAAGAATGTGCGGACCCGGCGTACGTATGTGGATACTTTAAGAAGGGAAAGCGCAACCGTCCAAATTCTAATGAACAAAAGAACACAGGAATACAAGAACACAAGAGCGATA	7.30472
AAT2_1to28_30snps_2	Randomly_Mutated_Window	GGACCGGAATACAACATAGTTGCGGGTTACGTATGTGGATACTTTAAGAAGGGAAAGCGCAACCGTCCAAATTCTAATGAACAAAAGAACACAGGAATACAAGAACACAAGAGCGATA	6.18666
AAT2_29to58_30snps_1	Randomly_Mutated_Window	CCTTGTCGCCTTGCACGTCGGTATATAAGTTCGCTCACGAGGAAATGCCCTAAGTCATGCAACCGTCCAAATTCTAATGAACAAAAGAACACAGGAATACAAGAACACAAGAGCGATA	8.24036
AAT2_29to58_30snps_2	Randomly_Mutated_Window	CCTTGTCGCCTTGCACGTCGGTATATAACTCCCCACATTCCAGAGGCCGCTACCCTTGGCAACCGTCCAAATTCTAATGAACAAAAGAACACAGGAATACAAGAACACAAGAGCGATA	4.79827
AAT2_59to88_30snps_1	Randomly_Mutated_Window	CCTTGTCGCCTTGCACGTCGGTATATAAACGTATGTGGATACTTTAAGAAGGGAAAGCATCCTGAGTGGCGAAAAGGACCGAGTCTTCACACAGGAATACAAGAACACAAGAGCGATA	NaN
AAT2_59to88_30snps_2	Randomly_Mutated_Window	CCTTGTCGCCTTGCACGTCGGTATATAAACGTATGTGGATACTTTAAGAAGGGAAAGCCTCTGGTAAATTGCCAATGCTGTAGCTGAGACACAGGAATACAAGAACACAAGAGCGATA	8.6356
AAT2_89to118_30snps_1	Randomly_Mutated_Window	CCTTGTCGCCTTGCACGTCGGTATATAAACGTATGTGGATACTTTAAGAAGGGAAAGCGCAACCGTCCAAATTCTAATGAACAAAAGACTGTCCTGGCGGGCAGCGTAGCCCATTGCC	2.3189
AAT2_89to118_30snps_2	Randomly_Mutated_Window	CCTTGTCGCCTTGCACGTCGGTATATAAACGTATGTGGATACTTTAAGAAGGGAAAGCGCAACCGTCCAAATTCTAATGAACAAAAGAGGTTGCATTCCATCTTGTCTGCATTTTCCG	6.25172
COX5A_1to28_30snps_1	Randomly_Mutated_Window	CCGTTATTATGTTCAGAGTTCGTCTGCTTCAATTAAATAAGAACCATCAGTCCTCGTATTTTGTCTTCTGTTTGCAAGCAATGCACCAAACACAAGATCAACTAAGAACGCATCTACA	5.97992
COX5A_1to28_30snps_2	Randomly_Mutated_Window	TTACTAAAACCCTTAAGCTCTGAGCGGGTCAATTAAATAAGAACCATCAGTCCTCGTATTTTGTCTTCTGTTTGCAAGCAATGCACCAAACACAAGATCAACTAAGAACGCATCTACA	4.99575
COX5A_29to58_30snps_1	Randomly_Mutated_Window	AGCGGCGGCGAAAAGTTAAAAAGAACAAAAGGCCTGTAGGCCCTAGGTGAATGCATGCTTTTGTCTTCTGTTTGCAAGCAATGCACCAAACACAAGATCAACTAAGAACGCATCTACA	4.11221
COX5A_29to58_30snps_2	Randomly_Mutated_Window	AGCGGCGGCGAAAAGTTAAAAAGAACAAGACGACCCTGTCTGTAACCAGCCGGAGACCTTTTGTCTTCTGTTTGCAAGCAATGCACCAAACACAAGATCAACTAAGAACGCATCTACA	3.35881
COX5A_59to88_30snps_1	Randomly_Mutated_Window	AGCGGCGGCGAAAAGTTAAAAAGAACAATCAATTAAATAAGAACCATCAGTCCTCGTACCCCTCGCATAAGCACTCGAGTGCCAGTTCAACACAAGATCAACTAAGAACGCATCTACA	8.10525
COX5A_59to88_30snps_2	Randomly_Mutated_Window	AGCGGCGGCGAAAAGTTAAAAAGAACAATCAATTAAATAAGAACCATCAGTCCTCGTACCCACGTAAACACGCTTGCCGGGGCGTGATAACACAAGATCAACTAAGAACGCATCTACA	5.27485
COX5A_89to118_30snps_1	Randomly_Mutated_Window	AGCGGCGGCGAAAAGTTAAAAAGAACAATCAATTAAATAAGAACCATCAGTCCTCGTATTTTGTCTTCTGTTTGCAAGCAATGCACCATCGGTGTTTAGTCACTCATTACGGAAGCAC	4.37737
COX5A_89to118_30snps_2	Randomly_Mutated_Window	AGCGGCGGCGAAAAGTTAAAAAGAACAATCAATTAAATAAGAACCATCAGTCCTCGTATTTTGTCTTCTGTTTGCAAGCAATGCACCAGCACTTTTGGTGTGGCCCGGTATTAAATAG	4.89205
ADH3_1to28_30snps_1	Randomly_Mutated_Window	GCGGAGTCACGTGCTGGTGAGCCGAGAGTCGACCGAATTTACTATACATGGATATATATATATTATCTTCTGTTCACAGTTAAAACTAGGAATAGTATAGTCATAAGTTAACACCATC	3.79757
ADH3_1to28_30snps_2	Randomly_Mutated_Window	CAATCTTGCTTTTTGAACGGACGAGGGCTCGACCGAATTTACTATACATGGATATATATATATTATCTTCTGTTCACAGTTAAAACTAGGAATAGTATAGTCATAAGTTAACACCATC	6.14705
ADH3_29to58_30snps_1	Randomly_Mutated_Window	TTTAGAAAGGAACACTCGCTTTATCTCTGGCGTTTGGAGGGGCCGTATACACCTGCAGTATATTATCTTCTGTTCACAGTTAAAACTAGGAATAGTATAGTCATAAGTTAACACCATC	5.79062
ADH3_29to58_30snps_2	Randomly_Mutated_Window	TTTAGAAAGGAACACTCGCTTTATCTCTGGTTTACTTGAATTCCCTATGCTCCTAGATTATATTATCTTCTGTTCACAGTTAAAACTAGGAATAGTATAGTCATAAGTTAACACCATC	7.39978
ADH3_59to88_30snps_1	Randomly_Mutated_Window	TTTAGAAAGGAACACTCGCTTTATCTCTTCGACCGAATTTACTATACATGGATATATAATGCGACGAGGGAAGAGTACCAGTCTTAAGGGAATAGTATAGTCATAAGTTAACACCATC	5.48946
ADH3_59to88_30snps_2	Randomly_Mutated_Window	TTTAGAAAGGAACACTCGCTTTATCTCTTCGACCGAATTTACTATACATGGATATATAACATGGTAAGCGCCAAGCTCTAACCCTGCTGGAATAGTATAGTCATAAGTTAACACCATC	5.32864
ADH3_89to118_30snps_1	Randomly_Mutated_Window	TTTAGAAAGGAACACTCGCTTTATCTCTTCGACCGAATTTACTATACATGGATATATATATATTATCTTCTGTTCACAGTTAAAACTATTTTGGCAGCTCGTTGTTCGCGGTCGATCA	4.83626
ADH3_89to118_30snps_2	Randomly_Mutated_Window	TTTAGAAAGGAACACTCGCTTTATCTCTTCGACCGAATTTACTATACATGGATATATATATATTATCTTCTGTTCACAGTTAAAACTATAGGACTGCCCACACCGCTGATTATAGGGT	6.09363
DED81_1to28_30snps_1	Randomly_Mutated_Window	GGGTCACCAACGTCTACATCTGCCGTGCACGTTTGGGCCTCAGATTGTGCGTAGTAGTAGTCGGTGCTGGGTCCTCACGCAAGTAGCAAGGTAATCTATATCCTCATTTTTTTCAAAC	2.15523
DED81_1to28_30snps_2	Randomly_Mutated_Window	CCGCGATCCACGGCGAAACTTTACTCGGACGTTTGGGCCTCAGATTGTGCGTAGTAGTAGTCGGTGCTGGGTCCTCACGCAAGTAGCAAGGTAATCTATATCCTCATTTTTTTCAAAC	1.2673
DED81_29to58_30snps_1	Randomly_Mutated_Window	AAAGACGATCAAAAAGGTAGAAGAAATTGGACAAACAATCTCAGAGAACGCGCCAGACAGTCGGTGCTGGGTCCTCACGCAAGTAGCAAGGTAATCTATATCCTCATTTTTTTCAAAC	4.51322
DED81_29to58_30snps_2	Randomly_Mutated_Window	AAAGACGATCAAAAAGGTAGAAGAAATTTTCCCACTAGGAATTGAAACTTAAGCCGTCAGTCGGTGCTGGGTCCTCACGCAAGTAGCAAGGTAATCTATATCCTCATTTTTTTCAAAC	3.67414
DED81_59to88_30snps_1	Randomly_Mutated_Window	AAAGACGATCAAAAAGGTAGAAGAAATTACGTTTGGGCCTCAGATTGTGCGTAGTAGTCCGAATATACTCTGTAAATACACTAGGCGCAGGTAATCTATATCCTCATTTTTTTCAAAC	4.24107
DED81_59to88_30snps_2	Randomly_Mutated_Window	AAAGACGATCAAAAAGGTAGAAGAAATTACGTTTGGGCCTCAGATTGTGCGTAGTAGTCACAAAGTGAATTGGAGGCAAATGTCGATTAGGTAATCTATATCCTCATTTTTTTCAAAC	2.67295
DED81_89to118_30snps_1	Randomly_Mutated_Window	AAAGACGATCAAAAAGGTAGAAGAAATTACGTTTGGGCCTCAGATTGTGCGTAGTAGTAGTCGGTGCTGGGTCCTCACGCAAGTAGCAGTCCGGCTACAGATTATGCAGAGCGGCCTG	NaN
DED81_89to118_30snps_2	Randomly_Mutated_Window	AAAGACGATCAAAAAGGTAGAAGAAATTACGTTTGGGCCTCAGATTGTGCGTAGTAGTAGTCGGTGCTGGGTCCTCACGCAAGTAGCACCACGGCAACACAGTGTCGGACACAAGGCA	0.665665
RPS17A_1to28_30snps_1	Randomly_Mutated_Window	GGTAATTGCTCGATGCCGCGATCTGCGCTAGCGTAATATGTATGAAATTAGGTATTAATCAAGCATTAATCGACTTAATTCTAAGAAAAGTCAAGATCTCGAGACTAGCAATAACAAA	4.60176
RPS17A_1to28_30snps_2	Randomly_Mutated_Window	CAGCCGCACCGGCAGCGCTGGATTTGTATAGCGTAATATGTATGAAATTAGGTATTAATCAAGCATTAATCGACTTAATTCTAAGAAAAGTCAAGATCTCGAGACTAGCAATAACAAA	NaN
RPS17A_29to58_30snps_1	Randomly_Mutated_Window	ATCGTCGTGATCGCTTTTACTGGCATATACAGAAGTATGCGCGAGCCACCTCCTGGTTTCAAGCATTAATCGACTTAATTCTAAGAAAAGTCAAGATCTCGAGACTAGCAATAACAAA	6.2644
RPS17A_29to58_30snps_2	Randomly_Mutated_Window	ATCGTCGTGATCGCTTTTACTGGCATATAGAAACGCGGGTATCTTCTAGTTAGCCCGCTCAAGCATTAATCGACTTAATTCTAAGAAAAGTCAAGATCTCGAGACTAGCAATAACAAA	7.45372
RPS17A_59to88_30snps_1	Randomly_Mutated_Window	ATCGTCGTGATCGCTTTTACTGGCATATTAGCGTAATATGTATGAAATTAGGTATTAACTTCCTTGGTCAGTGACACGCAGATCAGGTAGTCAAGATCTCGAGACTAGCAATAACAAA	6.34401
RPS17A_59to88_30snps_2	Randomly_Mutated_Window	ATCGTCGTGATCGCTTTTACTGGCATATTAGCGTAATATGTATGAAATTAGGTATTAAGTTCCGGACGCGTCTGCCCTGGTCTGACTTAGTCAAGATCTCGAGACTAGCAATAACAAA	5.19262
RPS17A_89to118_30snps_1	Randomly_Mutated_Window	ATCGTCGTGATCGCTTTTACTGGCATATTAGCGTAATATGTATGAAATTAGGTATTAATCAAGCATTAATCGACTTAATTCTAAGAAACAAGTTATGAAGCCTCAGGTACGCCGTTCC	NaN
RPS17A_89to118_30snps_2	Randomly_Mutated_Window	ATCGTCGTGATCGCTTTTACTGGCATATTAGCGTAATATGTATGAAATTAGGTATTAATCAAGCATTAATCGACTTAATTCTAAGAAACTGGCGTGAAGGATCCAACTGGTGCGGGTG	6.07704
BDH1_1to28_30snps_1	Randomly_Mutated_Window	CCATTTCGCCTCTTTGGAAGAAAACAGAGTTGCCCTTCTTCTTTCTTAAAAAGTCTTAGTACGATTGACCAAGTCAGAAAAAAAAAAAAAAAGGAACTAAAAAAAGTTTTAATTAATT	NaN
BDH1_1to28_30snps_2	Randomly_Mutated_Window	TGTTTATTCGTTTCAGTGGCAATATCTAGTTGCCCTTCTTCTTTCTTAAAAAGTCTTAGTACGATTGACCAAGTCAGAAAAAAAAAAAAAAAGGAACTAAAAAAAGTTTTAATTAATT	NaN
BDH1_29to58_30snps_1	Randomly_Mutated_Window	ATGGCCAATTCAAGCCCTTTGGGCAGATAAGTATGGAGCAACACGAATCCTCAAGAGCGTACGATTGACCAAGTCAGAAAAAAAAAAAAAAAGGAACTAAAAAAAGTTTTAATTAATT	NaN
BDH1_29to58_30snps_2	Randomly_Mutated_Window	ATGGCCAATTCAAGCCCTTTGGGCAGATCGGCGAGCATCCAAGCGGACCCTTAGTAAGGTACGATTGACCAAGTCAGAAAAAAAAAAAAAAAGGAACTAAAAAAAGTTTTAATTAATT	NaN
BDH1_59to88_30snps_1	Randomly_Mutated_Window	ATGGCCAATTCAAGCCCTTTGGGCAGATGTTGCCCTTCTTCTTTCTTAAAAAGTCTTAACTGTTGACGTGGCTAATCGTTCTCGGGCCAAAAGGAACTAAAAAAAGTTTTAATTAATT	3.09467
BDH1_59to88_30snps_2	Randomly_Mutated_Window	ATGGCCAATTCAAGCCCTTTGGGCAGATGTTGCCCTTCTTCTTTCTTAAAAAGTCTTACCTTATGCATTTTTAGGCCTTTTCGTCGGGAAAAGGAACTAAAAAAAGTTTTAATTAATT	2.40614
BDH1_89to118_30snps_1	Randomly_Mutated_Window	ATGGCCAATTCAAGCCCTTTGGGCAGATGTTGCCCTTCTTCTTTCTTAAAAAGTCTTAGTACGATTGACCAAGTCAGAAAAAAAAAAAGCTGCCCTGGCTCGCGCTCAACTCAAGGGA	3.98647
BDH1_89to118_30snps_2	Randomly_Mutated_Window	ATGGCCAATTCAAGCCCTTTGGGCAGATGTTGCCCTTCTTCTTTCTTAAAAAGTCTTAGTACGATTGACCAAGTCAGAAAAAAAAAAACGTGACCCTCTTGTCTTTCAACCTAATTCC	2.29107
VMA2_1to28_30snps_1	Randomly_Mutated_Window	CGGTGTGGCCGCGTTGCGCGTCTCGTCGAATGATTTTAATACAGATAGACAACCATTGTTGACAGGATTGCGATTGTAAGAGTAGACAGTACATCAAGCGAAAATAAATATTGCAGGA	0.1399
VMA2_1to28_30snps_2	Randomly_Mutated_Window	TTCTTTGCTTTCCTCGACACCGCATAGTAATGATTTTAATACAGATAGACAACCATTGTTGACAGGATTGCGATTGTAAGAGTAGACAGTACATCAAGCGAAAATAAATATTGCAGGA	8.95568
VMA2_29to58_30snps_1	Randomly_Mutated_Window	AAAGAAAAGGATAAGAGATAAAGGACTACGGAGGGCAGTGTTCCCCTATGGGGACACATTGACAGGATTGCGATTGTAAGAGTAGACAGTACATCAAGCGAAAATAAATATTGCAGGA	4.84663
VMA2_29to58_30snps_2	Randomly_Mutated_Window	AAAGAAAAGGATAAGAGATAAAGGACTAGCGAGACCCTTCTAGTTCTCTTTTTTCGACTTGACAGGATTGCGATTGTAAGAGTAGACAGTACATCAAGCGAAAATAAATATTGCAGGA	9.39008
VMA2_59to88_30snps_1	Randomly_Mutated_Window	AAAGAAAAGGATAAGAGATAAAGGACTAAATGATTTTAATACAGATAGACAACCATTGGGACGCTCTAATAAGGGCCCGATAATTCTTGTACATCAAGCGAAAATAAATATTGCAGGA	5.32926
VMA2_59to88_30snps_2	Randomly_Mutated_Window	AAAGAAAAGGATAAGAGATAAAGGACTAAATGATTTTAATACAGATAGACAACCATTGCAACGCATGGCATTGCGTCCTAGAGGCGTGGTACATCAAGCGAAAATAAATATTGCAGGA	2.56404
VMA2_89to118_30snps_1	Randomly_Mutated_Window	AAAGAAAAGGATAAGAGATAAAGGACTAAATGATTTTAATACAGATAGACAACCATTGTTGACAGGATTGCGATTGTAAGAGTAGACACGTACAACTTTCTTTGGCGTGCAGCGGAAG	6.7581
VMA2_89to118_30snps_2	Randomly_Mutated_Window	AAAGAAAAGGATAAGAGATAAAGGACTAAATGATTTTAATACAGATAGACAACCATTGTTGACAGGATTGCGATTGTAAGAGTAGACACGGTTAGTGTATCCTTCTGTACCATGCTTG	NaN
RPT2_1to28_30snps_1	Randomly_Mutated_Window	GTCGCAAACCCCGTCGTTCATCAAGAGCTGTGAATATTAGTGAATATGATGCGTATCAGTGTCAAGCTTACAGTCAATTCAAGTTAAAGAAGAGACAGCGTTTTTAATAGAAAATAAA	7.00345
RPT2_1to28_30snps_2	Randomly_Mutated_Window	GGAAGCTGCCCGTGAGGGGAGGCACATCTGTGAATATTAGTGAATATGATGCGTATCAGTGTCAAGCTTACAGTCAATTCAAGTTAAAGAAGAGACAGCGTTTTTAATAGAAAATAAA	6.0362
RPT2_29to58_30snps_1	Randomly_Mutated_Window	TCTTTTCTTTTACCTAAAAGAAGGTTAACACATTGGCACTGCGGACACTATACAGGGTGTGTCAAGCTTACAGTCAATTCAAGTTAAAGAAGAGACAGCGTTTTTAATAGAAAATAAA	NaN
RPT2_29to58_30snps_2	Randomly_Mutated_Window	TCTTTTCTTTTACCTAAAAGAAGGTTAACTGAGGGTCCGAGTTTACCCTGTGCGTCAGGTGTCAAGCTTACAGTCAATTCAAGTTAAAGAAGAGACAGCGTTTTTAATAGAAAATAAA	NaN
RPT2_59to88_30snps_1	Randomly_Mutated_Window	TCTTTTCTTTTACCTAAAAGAAGGTTAATGTGAATATTAGTGAATATGATGCGTATCAAACCGGGAAGATGTCCGCTAAGTCTAAGCGGAAGAGACAGCGTTTTTAATAGAAAATAAA	3.58061
RPT2_59to88_30snps_2	Randomly_Mutated_Window	TCTTTTCTTTTACCTAAAAGAAGGTTAATGTGAATATTAGTGAATATGATGCGTATCACACCGTTTAGAGGTAGTTGCGGGTACACTCGAAGAGACAGCGTTTTTAATAGAAAATAAA	5.79174
RPT2_89to118_30snps_1	Randomly_Mutated_Window	TCTTTTCTTTTACCTAAAAGAAGGTTAATGTGAATATTAGTGAATATGATGCGTATCAGTGTCAAGCTTACAGTCAATTCAAGTTAAAACGTTAGGCTTCACGGCCTGTCTCTCGTGT	1.82786
RPT2_89to118_30snps_2	Randomly_Mutated_Window	TCTTTTCTTTTACCTAAAAGAAGGTTAATGTGAATATTAGTGAATATGATGCGTATCAGTGTCAAGCTTACAGTCAATTCAAGTTAAATGGACAGACTGACCCGATCGCACCCGCCGG	1.4609
SOL4_1to28_30snps_1	Randomly_Mutated_Window	ATCGTGTGCGGTGGCCGGAACGCGCCGCTAAGAAATGACGAAGAACGTAGTCTTATCGCAGCAGTTTTCCAAACAAAGAATGCCATTCATCAAATAATCCACAACCACCTCAAGAAAA	2.26835
SOL4_1to28_30snps_2	Randomly_Mutated_Window	GGTTAGGGGGGTCGGATATACCTCCCCGTAAGAAATGACGAAGAACGTAGTCTTATCGCAGCAGTTTTCCAAACAAAGAATGCCATTCATCAAATAATCCACAACCACCTCAAGAAAA	2.35104
SOL4_29to58_30snps_1	Randomly_Mutated_Window	CAGCGAAAATTGTAAGATCCATAATATTGCCCCTCGCGAAGTATTGCACCCACGCAGACAGCAGTTTTCCAAACAAAGAATGCCATTCATCAAATAATCCACAACCACCTCAAGAAAA	2.28034
SOL4_29to58_30snps_2	Randomly_Mutated_Window	CAGCGAAAATTGTAAGATCCATAATATTAGTCTGTGCGTTTCTTGATAGAGTGGCAAACAGCAGTTTTCCAAACAAAGAATGCCATTCATCAAATAATCCACAACCACCTCAAGAAAA	2.46636
SOL4_59to88_30snps_1	Randomly_Mutated_Window	CAGCGAAAATTGTAAGATCCATAATATTTAAGAAATGACGAAGAACGTAGTCTTATCGTGTTCTGGCGTACCTTCGGTGTCCTTGGAGATCAAATAATCCACAACCACCTCAAGAAAA	8.9739
SOL4_59to88_30snps_2	Randomly_Mutated_Window	CAGCGAAAATTGTAAGATCCATAATATTTAAGAAATGACGAAGAACGTAGTCTTATCGGCAGGTGCGAGTTTCATCCTTCGCTGCGCAATCAAATAATCCACAACCACCTCAAGAAAA	8.76422
SOL4_89to118_30snps_1	Randomly_Mutated_Window	CAGCGAAAATTGTAAGATCCATAATATTTAAGAAATGACGAAGAACGTAGTCTTATCGCAGCAGTTTTCCAAACAAAGAATGCCATTCGATGCGACTGGATGGGTATTTCTCCTTCGT	NaN
SOL4_89to118_30snps_2	Randomly_Mutated_Window	CAGCGAAAATTGTAAGATCCATAATATTTAAGAAATGACGAAGAACGTAGTCTTATCGCAGCAGTTTTCCAAACAAAGAATGCCATTCCAAGGTACGGTGTGTCTATTGGGTGCTGCT	5.97836
RPS29A_1to28_30snps_1	Randomly_Mutated_Window	TCACTTTATCGTGGTTTCGAGCCTTTATCACGAGTTATCAACCTCATTCTCTTTAAAATTGGAATCCAATCAACCGAATTCATTTGTACTAACAACGTTTCCTATTATTGCAGATAAA	6.96505
RPS29A_1to28_30snps_2	Randomly_Mutated_Window	TCAATACACTATGGGTACCATCTGGGGACACGAGTTATCAACCTCATTCTCTTTAAAATTGGAATCCAATCAACCGAATTCATTTGTACTAACAACGTTTCCTATTATTGCAGATAAA	6.20146
RPS29A_29to58_30snps_1	Randomly_Mutated_Window	ATGGACGGAATAACAGGTATAAAAAATCGGAATCCATATGTGGCTGAGTAAAAACGCGTTGGAATCCAATCAACCGAATTCATTTGTACTAACAACGTTTCCTATTATTGCAGATAAA	7.31657
RPS29A_29to58_30snps_2	Randomly_Mutated_Window	ATGGACGGAATAACAGGTATAAAAAATCGCATCCAGTCAGCGGAGCGCTCGGCATCCTTTGGAATCCAATCAACCGAATTCATTTGTACTAACAACGTTTCCTATTATTGCAGATAAA	10.1788
RPS29A_59to88_30snps_1	Randomly_Mutated_Window	ATGGACGGAATAACAGGTATAAAAAATCCACGAGTTATCAACCTCATTCTCTTTAAAAAGCTCTCGTGTAGCTTGAGTCGGGAAAAGGCTAACAACGTTTCCTATTATTGCAGATAAA	12.745
RPS29A_59to88_30snps_2	Randomly_Mutated_Window	ATGGACGGAATAACAGGTATAAAAAATCCACGAGTTATCAACCTCATTCTCTTTAAAAAGACGGAGAGCGAGGGATTGGGGGGCCCGCCTAACAACGTTTCCTATTATTGCAGATAAA	7.02861
RPS29A_89to118_30snps_1	Randomly_Mutated_Window	ATGGACGGAATAACAGGTATAAAAAATCCACGAGTTATCAACCTCATTCTCTTTAAAATTGGAATCCAATCAACCGAATTCATTTGTAAATCACGGTAGCTAAGCCTAGAATACCGCT	10.5373
RPS29A_89to118_30snps_2	Randomly_Mutated_Window	ATGGACGGAATAACAGGTATAAAAAATCCACGAGTTATCAACCTCATTCTCTTTAAAATTGGAATCCAATCAACCGAATTCATTTGTAGCGGGGTGTAGGAGCTAATACTGCCGATGC	NaN
BAT2_1to28_30snps_1	Randomly_Mutated_Window	ACAAACGTACAGAGGCACTGGCTGTCGGATTCCTTTGAGAAATCCTTAATAAAAACAGACTAACTACTAAAATTTTAGAAATTTAAGGGAAAGCATCTCCACGAGTTTTAAGAACGAT	5.43453
BAT2_1to28_30snps_2	Randomly_Mutated_Window	ACCATCGTATGAAGTATTAGCGCGTAATATTCCTTTGAGAAATCCTTAATAAAAACAGACTAACTACTAAAATTTTAGAAATTTAAGGGAAAGCATCTCCACGAGTTTTAAGAACGAT	5.93938
BAT2_29to58_30snps_1	Randomly_Mutated_Window	TATTCGACTATTTCCTGGGAAAAAATTCGAGTTCGGCTTGCTGGAAGGCGTTCCTTCCACTAACTACTAAAATTTTAGAAATTTAAGGGAAAGCATCTCCACGAGTTTTAAGAACGAT	3.3693
BAT2_29to58_30snps_2	Randomly_Mutated_Window	TATTCGACTATTTCCTGGGAAAAAATTCGACATCACACCCTGAAGAACTAGGCGTATAACTAACTACTAAAATTTTAGAAATTTAAGGGAAAGCATCTCCACGAGTTTTAAGAACGAT	6.35224
BAT2_59to88_30snps_1	Randomly_Mutated_Window	TATTCGACTATTTCCTGGGAAAAAATTCATTCCTTTGAGAAATCCTTAATAAAAACAGTACGGTCTACTGCCGCGGGTGTTAAATGCAGAAAGCATCTCCACGAGTTTTAAGAACGAT	3.3693
BAT2_59to88_30snps_2	Randomly_Mutated_Window	TATTCGACTATTTCCTGGGAAAAAATTCATTCCTTTGAGAAATCCTTAATAAAAACAGTGCCTGCTGAGCCTGCACGCCTGGGCGCCCGAAAGCATCTCCACGAGTTTTAAGAACGAT	3.11201
BAT2_89to118_30snps_1	Randomly_Mutated_Window	TATTCGACTATTTCCTGGGAAAAAATTCATTCCTTTGAGAAATCCTTAATAAAAACAGACTAACTACTAAAATTTTAGAAATTTAAGGAGCGAAGGAAAATGATTAGGACTTCGTTCA	NaN
BAT2_89to118_30snps_2	Randomly_Mutated_Window	TATTCGACTATTTCCTGGGAAAAAATTCATTCCTTTGAGAAATCCTTAATAAAAACAGACTAACTACTAAAATTTTAGAAATTTAAGGTCGGCTGATCTGGTCCCGCCGCCCGGTCTC	3.34203
VMA13_1to28_30snps_1	Randomly_Mutated_Window	CTTCTACCCCGGCCTGGCTTTTGCGGGGGTATTGTATATGACTGTTTTCCTGATAAAAGAATGCCTGCAATAATTCAAAGACAAGAGATATAAAAGTGCACTGGCGATTTCAGGAACA	4.03582
VMA13_1to28_30snps_2	Randomly_Mutated_Window	CTGCAAAACTGTTCCTTGCCGCCTGTCGGTATTGTATATGACTGTTTTCCTGATAAAAGAATGCCTGCAATAATTCAAAGACAAGAGATATAAAAGTGCACTGGCGATTTCAGGAACA	5.58609
VMA13_29to58_30snps_1	Randomly_Mutated_Window	AAAGGTTTGATAATGAAAAAAAAAAAAAACGCGCCCCTCACACAGGAAGACCGATTCCGAATGCCTGCAATAATTCAAAGACAAGAGATATAAAAGTGCACTGGCGATTTCAGGAACA	3.13099
VMA13_29to58_30snps_2	Randomly_Mutated_Window	AAAGGTTTGATAATGAAAAAAAAAAAAATGGAGTGCCCGCCACTGCAGGTACTCTCCTGAATGCCTGCAATAATTCAAAGACAAGAGATATAAAAGTGCACTGGCGATTTCAGGAACA	3.51053
VMA13_59to88_30snps_1	Randomly_Mutated_Window	AAAGGTTTGATAATGAAAAAAAAAAAAAGTATTGTATATGACTGTTTTCCTGATAAAATTGACGAAAGCGGGCGCATTTTTTCGCGACTATAAAAGTGCACTGGCGATTTCAGGAACA	3.68453
VMA13_59to88_30snps_2	Randomly_Mutated_Window	AAAGGTTTGATAATGAAAAAAAAAAAAAGTATTGTATATGACTGTTTTCCTGATAAAATTCCTGTGAAGGGCTCCGGCGTGGTCCCCCTATAAAAGTGCACTGGCGATTTCAGGAACA	NaN
VMA13_89to118_30snps_1	Randomly_Mutated_Window	AAAGGTTTGATAATGAAAAAAAAAAAAAGTATTGTATATGACTGTTTTCCTGATAAAAGAATGCCTGCAATAATTCAAAGACAAGAGACCCGCGGTATTTGATTTTTAACAGCAGTGC	6.11397
VMA13_89to118_30snps_2	Randomly_Mutated_Window	AAAGGTTTGATAATGAAAAAAAAAAAAAGTATTGTATATGACTGTTTTCCTGATAAAAGAATGCCTGCAATAATTCAAAGACAAGAGAATCCTCGTGAAGTCTATTGGCGGCTCCGGG	2.32866
RPB10_1to28_30snps_1	Randomly_Mutated_Window	GCCCTCCCGATGTCGTGGCTGAGCGGGCTGAATAAAATCACAATGGGATGATAGTTAAAGTGTATTCAAACTGTAGAGTGTAGAACGTAAACCTCAATAAGCAAAATAATAATACAAA	6.52339
RPB10_1to28_30snps_2	Randomly_Mutated_Window	CAACTCGGCAGTGTGTTCGGCCCCGTGCTGAATAAAATCACAATGGGATGATAGTTAAAGTGTATTCAAACTGTAGAGTGTAGAACGTAAACCTCAATAAGCAAAATAATAATACAAA	6.21245
RPB10_29to58_30snps_1	Randomly_Mutated_Window	ATTTCATAAGAAAAAAAAAAAGAAACATGACTCTGCCCACAGCCTATTATCGTAAATTAGTGTATTCAAACTGTAGAGTGTAGAACGTAAACCTCAATAAGCAAAATAATAATACAAA	3.60186
RPB10_29to58_30snps_2	Randomly_Mutated_Window	ATTTCATAAGAAAAAAAAAAAGAAACATATGGATTCGGTCTGGCTCCTACCAGTAGTGAGTGTATTCAAACTGTAGAGTGTAGAACGTAAACCTCAATAAGCAAAATAATAATACAAA	5.13338
RPB10_59to88_30snps_1	Randomly_Mutated_Window	ATTTCATAAGAAAAAAAAAAAGAAACATTGAATAAAATCACAATGGGATGATAGTTAACAGCCGCCTGGTTACGGCGACCCCTCTTCGAAACCTCAATAAGCAAAATAATAATACAAA	NaN
RPB10_59to88_30snps_2	Randomly_Mutated_Window	ATTTCATAAGAAAAAAAAAAAGAAACATTGAATAAAATCACAATGGGATGATAGTTAACAAACCACTTTGACCCCATCACACAGCGCGAAACCTCAATAAGCAAAATAATAATACAAA	7.08917
RPB10_89to118_30snps_1	Randomly_Mutated_Window	ATTTCATAAGAAAAAAAAAAAGAAACATTGAATAAAATCACAATGGGATGATAGTTAAAGTGTATTCAAACTGTAGAGTGTAGAACGTTTCGGAATGCGGTGTTCCGTGCCTATGGTT	NaN
RPB10_89to118_30snps_2	Randomly_Mutated_Window	ATTTCATAAGAAAAAAAAAAAGAAACATTGAATAAAATCACAATGGGATGATAGTTAAAGTGTATTCAAACTGTAGAGTGTAGAACGTTCGTTAACGCGTTAGGGGCGTACGCCGTCT	2.34717
ATP15_1to28_30snps_1	Randomly_Mutated_Window	GGATTAGCAAGCGACGAGTCGGGCGATGGAGATACAAGTAGGCCTTTCTATTGAGTACTTAGCAAGATATGTATTTCTAAGAAACATCAACAGTTTCAGCCCACAACCGATTCATAAA	6.27113
ATP15_1to28_30snps_2	Randomly_Mutated_Window	GAAAGAAGCCCGAACTACTAGCGCGTCCGAGATACAAGTAGGCCTTTCTATTGAGTACTTAGCAAGATATGTATTTCTAAGAAACATCAACAGTTTCAGCCCACAACCGATTCATAAA	NaN
ATP15_29to58_30snps_1	Randomly_Mutated_Window	CCTCCCCTTTTTCGTCTAGTTAAATGAATGATCCAGCTGCCTGTGCGACGCACCTACGTTAGCAAGATATGTATTTCTAAGAAACATCAACAGTTTCAGCCCACAACCGATTCATAAA	4.34863
ATP15_29to58_30snps_2	Randomly_Mutated_Window	CCTCCCCTTTTTCGTCTAGTTAAATGAAATCCGGGTTCCTCAGACCATGGGATTCCTTTTAGCAAGATATGTATTTCTAAGAAACATCAACAGTTTCAGCCCACAACCGATTCATAAA	4.88161
ATP15_59to88_30snps_1	Randomly_Mutated_Window	CCTCCCCTTTTTCGTCTAGTTAAATGAAGAGATACAAGTAGGCCTTTCTATTGAGTACGAGCTTGCGCGGACTGCAAACGACCTTCGAAACAGTTTCAGCCCACAACCGATTCATAAA	5.46047
ATP15_59to88_30snps_2	Randomly_Mutated_Window	CCTCCCCTTTTTCGTCTAGTTAAATGAAGAGATACAAGTAGGCCTTTCTATTGAGTACCGCCGGGACGGCACGCAAGATGCCGGTTGTAACAGTTTCAGCCCACAACCGATTCATAAA	2.40977
ATP15_89to118_30snps_1	Randomly_Mutated_Window	CCTCCCCTTTTTCGTCTAGTTAAATGAAGAGATACAAGTAGGCCTTTCTATTGAGTACTTAGCAAGATATGTATTTCTAAGAAACATCGTGCTGGCAGAGAATGTTTGACCATGCCCT	NaN
ATP15_89to118_30snps_2	Randomly_Mutated_Window	CCTCCCCTTTTTCGTCTAGTTAAATGAAGAGATACAAGTAGGCCTTTCTATTGAGTACTTAGCAAGATATGTATTTCTAAGAAACATCGTTCAAAAACTTAATAGGATTTCCGCCTTT	5.08248
RPS22B_1to28_30snps_1	Randomly_Mutated_Window	CCAACGATGATTGTAACTAAGTTTGGCCTAACCCACTATTTTTTTCAGAAGATCAGATGCGAGAGCTCGAAGCATAAGTATAATACTAACGTTTCAAAACATAGTAATTAGGTAAAAA	6.10057
RPS22B_1to28_30snps_2	Randomly_Mutated_Window	GTTATTATCACCGGAACTATTGTTTAGGTAACCCACTATTTTTTTCAGAAGATCAGATGCGAGAGCTCGAAGCATAAGTATAATACTAACGTTTCAAAACATAGTAATTAGGTAAAAA	5.63081
RPS22B_29to58_30snps_1	Randomly_Mutated_Window	AACCGATAATAAACCGGAGGACACATTTGGGAGAGGGCCGGCAGAACATGAGGGTCGAGCGAGAGCTCGAAGCATAAGTATAATACTAACGTTTCAAAACATAGTAATTAGGTAAAAA	2.0338
RPS22B_29to58_30snps_2	Randomly_Mutated_Window	AACCGATAATAAACCGGAGGACACATTTATTGATCGACGCCGCCGATATCCGCTCTGCGCGAGAGCTCGAAGCATAAGTATAATACTAACGTTTCAAAACATAGTAATTAGGTAAAAA	4.13273
RPS22B_59to88_30snps_1	Randomly_Mutated_Window	AACCGATAATAAACCGGAGGACACATTTTAACCCACTATTTTTTTCAGAAGATCAGATTAATATTACGCTTTTTGGTAGCCTGCCGCTACGTTTCAAAACATAGTAATTAGGTAAAAA	5.95068
RPS22B_59to88_30snps_2	Randomly_Mutated_Window	AACCGATAATAAACCGGAGGACACATTTTAACCCACTATTTTTTTCAGAAGATCAGATAGATTGATAGCTTCGTGGGTGCATGCTACGACGTTTCAAAACATAGTAATTAGGTAAAAA	4.15363
RPS22B_89to118_30snps_1	Randomly_Mutated_Window	AACCGATAATAAACCGGAGGACACATTTTAACCCACTATTTTTTTCAGAAGATCAGATGCGAGAGCTCGAAGCATAAGTATAATACTAGGCCCCATGTCGGCTCCGCACTCTGCCTCC	NaN
RPS22B_89to118_30snps_2	Randomly_Mutated_Window	AACCGATAATAAACCGGAGGACACATTTTAACCCACTATTTTTTTCAGAAGATCAGATGCGAGAGCTCGAAGCATAAGTATAATACTACGTGCAATGTGGTCGCATGCACACCTCTGG	NaN
YNK1_1to28_30snps_1	Randomly_Mutated_Window	GTCCCCATTCCGACCTATAACCTATTGATTCTTATTTTGAAATAGGTTATCTATAGAATACTTTATCAAGTTATCAGGTTCTTTCCGGAAAAACATCTCATAAATCATCCCTGGAAAA	8.81186
YNK1_1to28_30snps_2	Randomly_Mutated_Window	TAAATTGCGAGATACTATGTCGCCTAAGTTCTTATTTTGAAATAGGTTATCTATAGAATACTTTATCAAGTTATCAGGTTCTTTCCGGAAAAACATCTCATAAATCATCCCTGGAAAA	7.71864
YNK1_29to58_30snps_1	Randomly_Mutated_Window	ACTTAGTACTTCGTTAGCTCATATCGTTCATAGTCCCCTGTCGTTAGACAGATCTTTTTACTTTATCAAGTTATCAGGTTCTTTCCGGAAAAACATCTCATAAATCATCCCTGGAAAA	6.61878
YNK1_29to58_30snps_2	Randomly_Mutated_Window	ACTTAGTACTTCGTTAGCTCATATCGTTCAGACTAGACCGGGGGAAGAGGTAGACCTTTACTTTATCAAGTTATCAGGTTCTTTCCGGAAAAACATCTCATAAATCATCCCTGGAAAA	NaN
YNK1_59to88_30snps_1	Randomly_Mutated_Window	ACTTAGTACTTCGTTAGCTCATATCGTTTTCTTATTTTGAAATAGGTTATCTATAGAAGCTGGGTAGTTCACGGAGATCAGCCCATTCAAAAACATCTCATAAATCATCCCTGGAAAA	NaN
YNK1_59to88_30snps_2	Randomly_Mutated_Window	ACTTAGTACTTCGTTAGCTCATATCGTTTTCTTATTTTGAAATAGGTTATCTATAGAAACTGACTAAGGTCATCATAAAAAACAAATCAAAAACATCTCATAAATCATCCCTGGAAAA	8.93764
YNK1_89to118_30snps_1	Randomly_Mutated_Window	ACTTAGTACTTCGTTAGCTCATATCGTTTTCTTATTTTGAAATAGGTTATCTATAGAATACTTTATCAAGTTATCAGGTTCTTTCCGGCCCGGTGATCATCGTGCATATAGGTATTCC	7.64503
YNK1_89to118_30snps_2	Randomly_Mutated_Window	ACTTAGTACTTCGTTAGCTCATATCGTTTTCTTATTTTGAAATAGGTTATCTATAGAATACTTTATCAAGTTATCAGGTTCTTTCCGGGGGCTACCGAAGACTTAATAGAGCCTCTTC	NaN
GRE2_1to28_30snps_1	Randomly_Mutated_Window	AAATTCGCCCTTGTTCATCCGCGAATGTTATATAAGGAGGAAAAGTCTATCTCTGTAGCGTTGATATAACGTGTACGATTTTCAAACAAACAGATAGCAGTATCACACGCCCGTAAAT	14.4214
GRE2_1to28_30snps_2	Randomly_Mutated_Window	GCATTCGCTTACGTAAGGCGGATGGGGGTATATAAGGAGGAAAAGTCTATCTCTGTAGCGTTGATATAACGTGTACGATTTTCAAACAAACAGATAGCAGTATCACACGCCCGTAAAT	12.3925
GRE2_29to58_30snps_1	Randomly_Mutated_Window	TTGAAAAAGGGATCCTTAGTTTCCCAACAGACCTCTTTAAGCGTTGTCCCGAAAAGTCCGTTGATATAACGTGTACGATTTTCAAACAAACAGATAGCAGTATCACACGCCCGTAAAT	8.11661
GRE2_29to58_30snps_2	Randomly_Mutated_Window	TTGAAAAAGGGATCCTTAGTTTCCCAACATATCCGACGAACGCTCGTGGATGGCCGTCCGTTGATATAACGTGTACGATTTTCAAACAAACAGATAGCAGTATCACACGCCCGTAAAT	6.22471
GRE2_59to88_30snps_1	Randomly_Mutated_Window	TTGAAAAAGGGATCCTTAGTTTCCCAACTATATAAGGAGGAAAAGTCTATCTCTGTAGTAGGTGGGACGTAGCACGACGACATGGCGCAACAGATAGCAGTATCACACGCCCGTAAAT	6.61871
GRE2_59to88_30snps_2	Randomly_Mutated_Window	TTGAAAAAGGGATCCTTAGTTTCCCAACTATATAAGGAGGAAAAGTCTATCTCTGTAGTTACTCGGGTTGAGTACATTGACATCTGACAACAGATAGCAGTATCACACGCCCGTAAAT	15.9538
GRE2_89to118_30snps_1	Randomly_Mutated_Window	TTGAAAAAGGGATCCTTAGTTTCCCAACTATATAAGGAGGAAAAGTCTATCTCTGTAGCGTTGATATAACGTGTACGATTTTCAAACACCACCGACCTCCCCGTGGTTAAAGCAGGCA	11.4229
GRE2_89to118_30snps_2	Randomly_Mutated_Window	TTGAAAAAGGGATCCTTAGTTTCCCAACTATATAAGGAGGAAAAGTCTATCTCTGTAGCGTTGATATAACGTGTACGATTTTCAAACAGCTTAGACATGTCCCACGCATGTGACGCCA	NaN
TIF11_1to28_30snps_1	Randomly_Mutated_Window	GTCCGCAATTGGCAAGTCGTAAATGGGCAGCTTCAATTTTAGTTTGCTGAAAGAAACCTTTACTTATGTAGAAGGTGTACTTGCAAAAGCACTAGTGTAATATAGAGCAAAGTTCATC	6.38576
TIF11_1to28_30snps_2	Randomly_Mutated_Window	TTCCCTCCTTACTATGCTCTAGATGGCTAGCTTCAATTTTAGTTTGCTGAAAGAAACCTTTACTTATGTAGAAGGTGTACTTGCAAAAGCACTAGTGTAATATAGAGCAAAGTTCATC	5.3522
TIF11_29to58_30snps_1	Randomly_Mutated_Window	CAAGAAGTAATAGTGAAAAATTGAAAAACCAAAGGCGCCGTCCGAAAGTTTCCGTTGATTTACTTATGTAGAAGGTGTACTTGCAAAAGCACTAGTGTAATATAGAGCAAAGTTCATC	5.00286
TIF11_29to58_30snps_2	Randomly_Mutated_Window	CAAGAAGTAATAGTGAAAAATTGAAAAATCACAAGGGCAATCGGCTAACTGGACGTAGTTTACTTATGTAGAAGGTGTACTTGCAAAAGCACTAGTGTAATATAGAGCAAAGTTCATC	4.41218
TIF11_59to88_30snps_1	Randomly_Mutated_Window	CAAGAAGTAATAGTGAAAAATTGAAAAAAGCTTCAATTTTAGTTTGCTGAAAGAAACCACCTGGCTGTGGTCTACCTGTAAAAGCTTTGCACTAGTGTAATATAGAGCAAAGTTCATC	6.12469
TIF11_59to88_30snps_2	Randomly_Mutated_Window	CAAGAAGTAATAGTGAAAAATTGAAAAAAGCTTCAATTTTAGTTTGCTGAAAGAAACCGCGGTAACACATTCGTAACGTACAATTGGCGCACTAGTGTAATATAGAGCAAAGTTCATC	NaN
TIF11_89to118_30snps_1	Randomly_Mutated_Window	CAAGAAGTAATAGTGAAAAATTGAAAAAAGCTTCAATTTTAGTTTGCTGAAAGAAACCTTTACTTATGTAGAAGGTGTACTTGCAAAAAGCGATCATGGTGTGGTGAGTTCTGAAGGG	NaN
TIF11_89to118_30snps_2	Randomly_Mutated_Window	CAAGAAGTAATAGTGAAAAATTGAAAAAAGCTTCAATTTTAGTTTGCTGAAAGAAACCTTTACTTATGTAGAAGGTGTACTTGCAAAACGCTGCCAAGGCCCGCAGAGGCCTCAGCGA	1.19377
VMA10_1to28_30snps_1	Randomly_Mutated_Window	AATCTCTCTTTCCCGCATCAGAAGGGTTGGGAGCGTGATAGATAAAGCAATCACACCTTAAACAATACATTTTTTTTTTTCCTGCAATCTCCAAAGTGTGCAAGGTATACAAAGCAGA	8.35045
VMA10_1to28_30snps_2	Randomly_Mutated_Window	CGTTCGCAGTTTTGACCTCCACAATGCGGGGAGCGTGATAGATAAAGCAATCACACCTTAAACAATACATTTTTTTTTTTCCTGCAATCTCCAAAGTGTGCAAGGTATACAAAGCAGA	7.09888
VMA10_29to58_30snps_1	Randomly_Mutated_Window	TTGGGTATCAAAAATTTCATCTCTAAAATCACCAACACATCTCTCCTGTCCTCTGTAGTAAACAATACATTTTTTTTTTTCCTGCAATCTCCAAAGTGTGCAAGGTATACAAAGCAGA	7.59985
VMA10_29to58_30snps_2	Randomly_Mutated_Window	TTGGGTATCAAAAATTTCATCTCTAAAATCACCACGTTGTTTAGGCCGTCGACAGGTATAAACAATACATTTTTTTTTTTCCTGCAATCTCCAAAGTGTGCAAGGTATACAAAGCAGA	6.67783
VMA10_59to88_30snps_1	Randomly_Mutated_Window	TTGGGTATCAAAAATTTCATCTCTAAAAGGGAGCGTGATAGATAAAGCAATCACACCTACGCGGCCCTCCCCGGCGCCAAGTACACCACTCCAAAGTGTGCAAGGTATACAAAGCAGA	3.54763
VMA10_59to88_30snps_2	Randomly_Mutated_Window	TTGGGTATCAAAAATTTCATCTCTAAAAGGGAGCGTGATAGATAAAGCAATCACACCTGTGCGCCCGTGAAAAACGCGGCGAGCGCTACTCCAAAGTGTGCAAGGTATACAAAGCAGA	3.80428
VMA10_89to118_30snps_1	Randomly_Mutated_Window	TTGGGTATCAAAAATTTCATCTCTAAAAGGGAGCGTGATAGATAAAGCAATCACACCTTAAACAATACATTTTTTTTTTTCCTGCAATTATATTGCATGCTGTCCCTGCAGTTTTTCG	NaN
VMA10_89to118_30snps_2	Randomly_Mutated_Window	TTGGGTATCAAAAATTTCATCTCTAAAAGGGAGCGTGATAGATAAAGCAATCACACCTTAAACAATACATTTTTTTTTTTCCTGCAATAGTGCGCTGTCTTTTCCACAGAGGGTAGAC	5.21829
QCR10_1to28_30snps_1	Randomly_Mutated_Window	TCCCTGGAACATCGCCGGGCGCCCTCGGTAGATATCTTCTGGAATAATCTTCACAGCAAAAGCGCAAGTCGAATAATATATCGATAAATACAATCCATAAGACTTAAAACTAACCTCA	6.02312
QCR10_1to28_30snps_2	Randomly_Mutated_Window	TGGCTACCCCCACGATGTATCAGCCCGTTAGATATCTTCTGGAATAATCTTCACAGCAAAAGCGCAAGTCGAATAATATATCGATAAATACAATCCATAAGACTTAAAACTAACCTCA	4.96765
QCR10_29to58_30snps_1	Randomly_Mutated_Window	CATAACAGTTTGAATGCATAATTTGTTAGCCGATGGGATCCTGCGCTCAGATCAGAAGAAAGCGCAAGTCGAATAATATATCGATAAATACAATCCATAAGACTTAAAACTAACCTCA	6.70534
QCR10_29to58_30snps_2	Randomly_Mutated_Window	CATAACAGTTTGAATGCATAATTTGTTAGCACACCTGATAACCGATTAGGCATTGAAGAAAGCGCAAGTCGAATAATATATCGATAAATACAATCCATAAGACTTAAAACTAACCTCA	8.78168
QCR10_59to88_30snps_1	Randomly_Mutated_Window	CATAACAGTTTGAATGCATAATTTGTTATAGATATCTTCTGGAATAATCTTCACAGCAGTCCTCACCTGATTTCTGACCGCGACGTGTTACAATCCATAAGACTTAAAACTAACCTCA	7.56781
QCR10_59to88_30snps_2	Randomly_Mutated_Window	CATAACAGTTTGAATGCATAATTTGTTATAGATATCTTCTGGAATAATCTTCACAGCAGGCTGCATCCAGAGGGGTGCAGGAATAGCTTACAATCCATAAGACTTAAAACTAACCTCA	3.31819
QCR10_89to118_30snps_1	Randomly_Mutated_Window	CATAACAGTTTGAATGCATAATTTGTTATAGATATCTTCTGGAATAATCTTCACAGCAAAAGCGCAAGTCGAATAATATATCGATAAAATTTCCGAGGGGAGGCGTCCCGCTCGTGGT	2.30362
QCR10_89to118_30snps_2	Randomly_Mutated_Window	CATAACAGTTTGAATGCATAATTTGTTATAGATATCTTCTGGAATAATCTTCACAGCAAAAGCGCAAGTCGAATAATATATCGATAAAAGGTTAAGTACGATAGATGTTGACCGTATG	NaN
ARO8_1to28_30snps_1	Randomly_Mutated_Window	CAGGGCAGAACGGCACCCCTCTACAGGAAACTTATTTCTTTTTCTTATTTTTCCATTCCACTAAGTTAAACCCTGCAGTTGATACAGACATTGAATAGGACAACCGATCGTTACTATC	5.17915
ARO8_1to28_30snps_2	Randomly_Mutated_Window	CCGCCCAGTTGCATACGGAGGTGGGTGCAACTTATTTCTTTTTCTTATTTTTCCATTCCACTAAGTTAAACCCTGCAGTTGATACAGACATTGAATAGGACAACCGATCGTTACTATC	6.12353
ARO8_29to58_30snps_1	Randomly_Mutated_Window	ATATATTTGGTTTGGTTATATCTTTAAGCCTGCTACATCCCCAACCCGCAAGGTTCCGCACTAAGTTAAACCCTGCAGTTGATACAGACATTGAATAGGACAACCGATCGTTACTATC	7.19366
ARO8_29to58_30snps_2	Randomly_Mutated_Window	ATATATTTGGTTTGGTTATATCTTTAAGCGTACGAGGGGCACGAGCCAGGAGTGGAAACACTAAGTTAAACCCTGCAGTTGATACAGACATTGAATAGGACAACCGATCGTTACTATC	NaN
ARO8_59to88_30snps_1	Randomly_Mutated_Window	ATATATTTGGTTTGGTTATATCTTTAAGAACTTATTTCTTTTTCTTATTTTTCCATTCTTGATCTAGCTTTGGCCACAGACCACTCCTCATTGAATAGGACAACCGATCGTTACTATC	11.7161
ARO8_59to88_30snps_2	Randomly_Mutated_Window	ATATATTTGGTTTGGTTATATCTTTAAGAACTTATTTCTTTTTCTTATTTTTCCATTCGGTGGGCAGGCCGTAGAGTTGCTTCGTCCTCATTGAATAGGACAACCGATCGTTACTATC	5.96357
ARO8_89to118_30snps_1	Randomly_Mutated_Window	ATATATTTGGTTTGGTTATATCTTTAAGAACTTATTTCTTTTTCTTATTTTTCCATTCCACTAAGTTAAACCCTGCAGTTGATACAGATTCGAGGCTTTCTCCGTTGGTTAAGACGAT	7.90423
ARO8_89to118_30snps_2	Randomly_Mutated_Window	ATATATTTGGTTTGGTTATATCTTTAAGAACTTATTTCTTTTTCTTATTTTTCCATTCCACTAAGTTAAACCCTGCAGTTGATACAGAATCGATTATTACGTCTTTGGTAGGGTCTAG	10.1515
VMA6_1to28_30snps_1	Randomly_Mutated_Window	CGGGGGCGCGTCTGCTGCTTGACGCAAGCCTCTTAACCCTTTAAGGTATGGCATAAAGAACGCTAAGAGCTAGCAAAAGAGTATACCATTCGGATCGTGTTGCTAAAGTCTTGCGAAG	2.9195
VMA6_1to28_30snps_2	Randomly_Mutated_Window	CGGTGCTAGGGCCAGCCGACCGTTCGTGCCTCTTAACCCTTTAAGGTATGGCATAAAGAACGCTAAGAGCTAGCAAAAGAGTATACCATTCGGATCGTGTTGCTAAAGTCTTGCGAAG	2.2466
VMA6_29to58_30snps_1	Randomly_Mutated_Window	TATACTGCAAAAACAAAAGAACAATTGATTATCATTGTTGCGGCTAAGACCGCCGGCCAACGCTAAGAGCTAGCAAAAGAGTATACCATTCGGATCGTGTTGCTAAAGTCTTGCGAAG	4.00005
VMA6_29to58_30snps_2	Randomly_Mutated_Window	TATACTGCAAAAACAAAAGAACAATTGATACAGCTCGGTCGGTTTAGTGAATTAGCCTAACGCTAAGAGCTAGCAAAAGAGTATACCATTCGGATCGTGTTGCTAAAGTCTTGCGAAG	4.84139
VMA6_59to88_30snps_1	Randomly_Mutated_Window	TATACTGCAAAAACAAAAGAACAATTGACCTCTTAACCCTTTAAGGTATGGCATAAAGTTACGGGCCCTGACAGGCCCCCACGGGAAGTTCGGATCGTGTTGCTAAAGTCTTGCGAAG	0.861502
VMA6_59to88_30snps_2	Randomly_Mutated_Window	TATACTGCAAAAACAAAAGAACAATTGACCTCTTAACCCTTTAAGGTATGGCATAAAGGTGAGCTGCTTTACTGGCTGCCAGGGGATCTTCGGATCGTGTTGCTAAAGTCTTGCGAAG	5.3594
VMA6_89to118_30snps_1	Randomly_Mutated_Window	TATACTGCAAAAACAAAAGAACAATTGACCTCTTAACCCTTTAAGGTATGGCATAAAGAACGCTAAGAGCTAGCAAAAGAGTATACCACCTTCTCACGCGCTGCGGTTAAACATTTCC	5.40305
VMA6_89to118_30snps_2	Randomly_Mutated_Window	TATACTGCAAAAACAAAAGAACAATTGACCTCTTAACCCTTTAAGGTATGGCATAAAGAACGCTAAGAGCTAGCAAAAGAGTATACCAACAAACATAACAATACCGCTATGACGTTGC	NaN
URA1_1to28_30snps_1	Randomly_Mutated_Window	AGCCATTTGTAATGGTCACGGATCAACCTCTTCTCTTGGATTACACAGTTTGGACTACTAGACGTTTCAAATAGATATACACAATTACTCAAAAAAAAATTGAACTTCCGTACCAAAC	7.52266
URA1_1to28_30snps_2	Randomly_Mutated_Window	TGGATTGTCGATGGCTACCCTGTCACCATCTTCTCTTGGATTACACAGTTTGGACTACTAGACGTTTCAAATAGATATACACAATTACTCAAAAAAAAATTGAACTTCCGTACCAAAC	3.34859
URA1_29to58_30snps_1	Randomly_Mutated_Window	GCATGGCATACGCATCGGGAACCGGTATGACCAATGGTTTAGTGCACACAGCACTGGGTAGACGTTTCAAATAGATATACACAATTACTCAAAAAAAAATTGAACTTCCGTACCAAAC	2.06617
URA1_29to58_30snps_2	Randomly_Mutated_Window	GCATGGCATACGCATCGGGAACCGGTATATGAACACGCAGCACGGTGAACAACCGATGTAGACGTTTCAAATAGATATACACAATTACTCAAAAAAAAATTGAACTTCCGTACCAAAC	5.24773
URA1_59to88_30snps_1	Randomly_Mutated_Window	GCATGGCATACGCATCGGGAACCGGTATTCTTCTCTTGGATTACACAGTTTGGACTACCGCCTCAGGTTTCCGATATGCTCTCCACCGTCAAAAAAAAATTGAACTTCCGTACCAAAC	0.168033
URA1_59to88_30snps_2	Randomly_Mutated_Window	GCATGGCATACGCATCGGGAACCGGTATTCTTCTCTTGGATTACACAGTTTGGACTACGCCGTCCAGTGTGGTATATCCTTAGTCATTTCAAAAAAAAATTGAACTTCCGTACCAAAC	NaN
URA1_89to118_30snps_1	Randomly_Mutated_Window	GCATGGCATACGCATCGGGAACCGGTATTCTTCTCTTGGATTACACAGTTTGGACTACTAGACGTTTCAAATAGATATACACAATTACGATCGGGTTGCCGACTAGCGACGGGTCGGA	2.22524
URA1_89to118_30snps_2	Randomly_Mutated_Window	GCATGGCATACGCATCGGGAACCGGTATTCTTCTCTTGGATTACACAGTTTGGACTACTAGACGTTTCAAATAGATATACACAATTACGATCGGGCTGCAGATCAACAGAACGAGGGT	3.58683
DPM1_1to28_30snps_1	Randomly_Mutated_Window	GACCCAACAAATACCGTCAGTTCTTGCGTTCAGTATTCTTACGTGTTCCTAACTCATATAGACCGCTATTGTAATAACGCTATCGCTTCAATTACACACAAACATACACGCACCCACA	NaN
DPM1_1to28_30snps_2	Randomly_Mutated_Window	CATGCACTAGAGTTTGGCGAAGGTCGAATTCAGTATTCTTACGTGTTCCTAACTCATATAGACCGCTATTGTAATAACGCTATCGCTTCAATTACACACAAACATACACGCACCCACA	5.31349
DPM1_29to58_30snps_1	Randomly_Mutated_Window	ATAAAGGATTTCCAGTATTTGAAAAATTAGGTAACGGGGCCAACCGAGACGTTGACACTAGACCGCTATTGTAATAACGCTATCGCTTCAATTACACACAAACATACACGCACCCACA	6.15794
DPM1_29to58_30snps_2	Randomly_Mutated_Window	ATAAAGGATTTCCAGTATTTGAAAAATTCCACAACAAGAAGGTGCCCGTACCACTCATTAGACCGCTATTGTAATAACGCTATCGCTTCAATTACACACAAACATACACGCACCCACA	7.3261
DPM1_59to88_30snps_1	Randomly_Mutated_Window	ATAAAGGATTTCCAGTATTTGAAAAATTTTCAGTATTCTTACGTGTTCCTAACTCATACGACTTCTGCCCACTGCTGTAGGTAATACGCAATTACACACAAACATACACGCACCCACA	NaN
DPM1_59to88_30snps_2	Randomly_Mutated_Window	ATAAAGGATTTCCAGTATTTGAAAAATTTTCAGTATTCTTACGTGTTCCTAACTCATAATTCTACAGCCCAGGCCGTAAAGCCTATAACAATTACACACAAACATACACGCACCCACA	8.34457
DPM1_89to118_30snps_1	Randomly_Mutated_Window	ATAAAGGATTTCCAGTATTTGAAAAATTTTCAGTATTCTTACGTGTTCCTAACTCATATAGACCGCTATTGTAATAACGCTATCGCTTTGTCATTGATGTGTATGGAGTTACGAAGAG	NaN
DPM1_89to118_30snps_2	Randomly_Mutated_Window	ATAAAGGATTTCCAGTATTTGAAAAATTTTCAGTATTCTTACGTGTTCCTAACTCATATAGACCGCTATTGTAATAACGCTATCGCTTTCGACGAGGTGCTGTCGGTTTAGCTTTCAG	3.63103
NQM1_1to28_30snps_1	Randomly_Mutated_Window	GCCTGGTGTAGGTCCTGTGACGCAGTGACAGTCATATTTATGCTAAGTATATCATTATTTCTTGCTAGCGTAAGTCATAAAAAATAGGAAATAATCACATATATACAAGAAATTAAAT	4.99471
NQM1_1to28_30snps_2	Randomly_Mutated_Window	GCATGCCCCTTCCCTATTAGACTATTGACAGTCATATTTATGCTAAGTATATCATTATTTCTTGCTAGCGTAAGTCATAAAAAATAGGAAATAATCACATATATACAAGAAATTAAAT	7.20522
NQM1_29to58_30snps_1	Randomly_Mutated_Window	CATATAAAAGAAGAGCAATCTTGCAGCGGTAGGGATAAGCCCAGCCCATGGGACAATGTTCTTGCTAGCGTAAGTCATAAAAAATAGGAAATAATCACATATATACAAGAAATTAAAT	11.1529
NQM1_29to58_30snps_2	Randomly_Mutated_Window	CATATAAAAGAAGAGCAATCTTGCAGCGTTTGGGGTGGACGAAATGTGGGTCGGGGTATTCTTGCTAGCGTAAGTCATAAAAAATAGGAAATAATCACATATATACAAGAAATTAAAT	NaN
NQM1_59to88_30snps_1	Randomly_Mutated_Window	CATATAAAAGAAGAGCAATCTTGCAGCGCAGTCATATTTATGCTAAGTATATCATTATGCGGACACTTACCGGAGTTGGTCCTGCGCAAAATAATCACATATATACAAGAAATTAAAT	12.3358
NQM1_59to88_30snps_2	Randomly_Mutated_Window	CATATAAAAGAAGAGCAATCTTGCAGCGCAGTCATATTTATGCTAAGTATATCATTATACACCCAGGCTTCCGTCGTCGGTCGGCGCTAAATAATCACATATATACAAGAAATTAAAT	NaN
NQM1_89to118_30snps_1	Randomly_Mutated_Window	CATATAAAAGAAGAGCAATCTTGCAGCGCAGTCATATTTATGCTAAGTATATCATTATTTCTTGCTAGCGTAAGTCATAAAAAATAGGTTTCCCCGGACGGCTACGCGATGCAATCTG	NaN
NQM1_89to118_30snps_2	Randomly_Mutated_Window	CATATAAAAGAAGAGCAATCTTGCAGCGCAGTCATATTTATGCTAAGTATATCATTATTTCTTGCTAGCGTAAGTCATAAAAAATAGGCGCCCGCGCAGATCCCGGTGACGTGGGCTA	NaN
QCR8_1to28_30snps_1	Randomly_Mutated_Window	CGGGTCGCGAAGGGAGCGAATAAAGGTTTTGTTTACTTGAGCAAGTCCGATTAAGAGTAAGTTGTCGTACGTTAAATACAAATAATCAACAAAACACTACACAAAAACTTCTACGATA	7.08123
QCR8_1to28_30snps_2	Randomly_Mutated_Window	CTTTTCGCGATTGAGGCGAATCGTGCGTTTGTTTACTTGAGCAAGTCCGATTAAGAGTAAGTTGTCGTACGTTAAATACAAATAATCAACAAAACACTACACAAAAACTTCTACGATA	7.02795
QCR8_29to58_30snps_1	Randomly_Mutated_Window	GAAAAGCAACGACCTCATCTCTCGAACAGGTGGCGGAGATATTGACGAAGCGGTACCAAAGTTGTCGTACGTTAAATACAAATAATCAACAAAACACTACACAAAAACTTCTACGATA	5.53514
QCR8_29to58_30snps_2	Randomly_Mutated_Window	GAAAAGCAACGACCTCATCTCTCGAACAACCAAACGAGTGTTGTTATAATGCTTACCAAAGTTGTCGTACGTTAAATACAAATAATCAACAAAACACTACACAAAAACTTCTACGATA	5.5595
QCR8_59to88_30snps_1	Randomly_Mutated_Window	GAAAAGCAACGACCTCATCTCTCGAACATTGTTTACTTGAGCAAGTCCGATTAAGAGTCTCCACATCCTGCCGTGGGGTGTCCTTGGCACAAAACACTACACAAAAACTTCTACGATA	3.43714
QCR8_59to88_30snps_2	Randomly_Mutated_Window	GAAAAGCAACGACCTCATCTCTCGAACATTGTTTACTTGAGCAAGTCCGATTAAGAGTTTACATGACCGGTGCTGCCTGGCCCGTGGGACAAAACACTACACAAAAACTTCTACGATA	3.34172
QCR8_89to118_30snps_1	Randomly_Mutated_Window	GAAAAGCAACGACCTCATCTCTCGAACATTGTTTACTTGAGCAAGTCCGATTAAGAGTAAGTTGTCGTACGTTAAATACAAATAATCATTGGCTTCGCCGCGCCTGGAGAAAGATGGC	NaN
QCR8_89to118_30snps_2	Randomly_Mutated_Window	GAAAAGCAACGACCTCATCTCTCGAACATTGTTTACTTGAGCAAGTCCGATTAAGAGTAAGTTGTCGTACGTTAAATACAAATAATCATGGTTCGCACGTGAGGCGCAACTGCGCGAT	0.908243
GLO1_1to28_30snps_1	Randomly_Mutated_Window	CCCAGGGTCGCGATGTAGCTTAATTTCGTATAAATAGGGAGAAAAAAAATCGGAATAACATTTCCATGCCTTTTTTTTGACACTTCAGACCAGATACGCCACCAGCTACAAACTAACA	19.4751
GLO1_1to28_30snps_2	Randomly_Mutated_Window	TCGAGTAAGTCACTGCTCCTCCCCAACATATAAATAGGGAGAAAAAAAATCGGAATAACATTTCCATGCCTTTTTTTTGACACTTCAGACCAGATACGCCACCAGCTACAAACTAACA	21.4716
GLO1_29to58_30snps_1	Randomly_Mutated_Window	ATATCCCGTATTTCTAGTTAGTGACGTTGCACTCATTTTCACTCGCCGTGGCTGCCGTCATTTCCATGCCTTTTTTTTGACACTTCAGACCAGATACGCCACCAGCTACAAACTAACA	4.28998
GLO1_29to58_30snps_2	Randomly_Mutated_Window	ATATCCCGTATTTCTAGTTAGTGACGTTCCGGGTGTCCACATCTTCCGGCGTCCCCCGCATTTCCATGCCTTTTTTTTGACACTTCAGACCAGATACGCCACCAGCTACAAACTAACA	NaN
GLO1_59to88_30snps_1	Randomly_Mutated_Window	ATATCCCGTATTTCTAGTTAGTGACGTTTATAAATAGGGAGAAAAAAAATCGGAATAAGGCCCTGCGCGACCAAAAGACTGCAGCTCCACCAGATACGCCACCAGCTACAAACTAACA	9.69043
GLO1_59to88_30snps_2	Randomly_Mutated_Window	ATATCCCGTATTTCTAGTTAGTGACGTTTATAAATAGGGAGAAAAAAAATCGGAATAAATAGATACCTGGCCAAAGCACGTCTAGAGCACCAGATACGCCACCAGCTACAAACTAACA	11.7961
GLO1_89to118_30snps_1	Randomly_Mutated_Window	ATATCCCGTATTTCTAGTTAGTGACGTTTATAAATAGGGAGAAAAAAAATCGGAATAACATTTCCATGCCTTTTTTTTGACACTTCAGTGATTCGCGCAGGTTCAAAGGTGTAACTAG	9.29001
GLO1_89to118_30snps_2	Randomly_Mutated_Window	ATATCCCGTATTTCTAGTTAGTGACGTTTATAAATAGGGAGAAAAAAAATCGGAATAACATTTCCATGCCTTTTTTTTGACACTTCAGGGACCTCTAATTCAGCAGAGAGGTGAGCTT	NaN
OST1_1to28_30snps_1	Randomly_Mutated_Window	TTACGAAGCCCGGCGGCTCCCGCGCGGGTTTATTAAGCAAGCTACTTCTTTGACAAGTACCCGATTGCTTCTTTAGCTCGGAACAAGACGCAAACTACAAAATATTGGTGCTGAAAAA	4.2925
OST1_1to28_30snps_2	Randomly_Mutated_Window	TTCTATTTCTCATGCGCCCGACAATTGCTTTATTAAGCAAGCTACTTCTTTGACAAGTACCCGATTGCTTCTTTAGCTCGGAACAAGACGCAAACTACAAAATATTGGTGCTGAAAAA	0.1399
OST1_29to58_30snps_1	Randomly_Mutated_Window	AGTATGCAGAACAAATTAATGTTTGCTTGACGCCCTATCTATCGAAATACGAGTTCCCACCCGATTGCTTCTTTAGCTCGGAACAAGACGCAAACTACAAAATATTGGTGCTGAAAAA	5.3061
OST1_29to58_30snps_2	Randomly_Mutated_Window	AGTATGCAGAACAAATTAATGTTTGCTTGGCGCGGCAACTAAGTTAGAGGGTGTGTACACCCGATTGCTTCTTTAGCTCGGAACAAGACGCAAACTACAAAATATTGGTGCTGAAAAA	2.95104
OST1_59to88_30snps_1	Randomly_Mutated_Window	AGTATGCAGAACAAATTAATGTTTGCTTTTTATTAAGCAAGCTACTTCTTTGACAAGTTATACTGATTCGAAGACAAATTTCTTGCATCGCAAACTACAAAATATTGGTGCTGAAAAA	7.86914
OST1_59to88_30snps_2	Randomly_Mutated_Window	AGTATGCAGAACAAATTAATGTTTGCTTTTTATTAAGCAAGCTACTTCTTTGACAAGTTATGCCAGCGCCGCAATCACACCGCTGTACCGCAAACTACAAAATATTGGTGCTGAAAAA	5.76886
OST1_89to118_30snps_1	Randomly_Mutated_Window	AGTATGCAGAACAAATTAATGTTTGCTTTTTATTAAGCAAGCTACTTCTTTGACAAGTACCCGATTGCTTCTTTAGCTCGGAACAAGAGATTTTACTGTTTGATACCCCTAAATGGTG	NaN
OST1_89to118_30snps_2	Randomly_Mutated_Window	AGTATGCAGAACAAATTAATGTTTGCTTTTTATTAAGCAAGCTACTTCTTTGACAAGTACCCGATTGCTTCTTTAGCTCGGAACAAGAAAAGTTGGGGCGCCGGCGACCTAAACCGTG	1.54218
LPD1_1to28_30snps_1	Randomly_Mutated_Window	GACCGTCAGAGAAATAGGGTCGAGGCCCTATATATATACATATAACGTATATTTATATATATACGGTTTTGTTCGATTGTCTCTGTCGTACCATCAAAGAACATACTAACAGTTCACA	0.1399
LPD1_1to28_30snps_2	Randomly_Mutated_Window	ATGGAATAAGGATCATGTCGGCGTACCTTATATATATACATATAACGTATATTTATATATATACGGTTTTGTTCGATTGTCTCTGTCGTACCATCAAAGAACATACTAACAGTTCACA	10.9866
LPD1_29to58_30snps_1	Randomly_Mutated_Window	CCTTTGACTCACCTCGAATATATATAGAGGAGGTGGCTACGCAGTTTAGATGGCTACGATATACGGTTTTGTTCGATTGTCTCTGTCGTACCATCAAAGAACATACTAACAGTTCACA	NaN
LPD1_29to58_30snps_2	Randomly_Mutated_Window	CCTTTGACTCACCTCGAATATATATAGAGCCGATCTCGGCGTGCGGTGCCGACGTCCGATATACGGTTTTGTTCGATTGTCTCTGTCGTACCATCAAAGAACATACTAACAGTTCACA	10.2209
LPD1_59to88_30snps_1	Randomly_Mutated_Window	CCTTTGACTCACCTCGAATATATATAGATATATATATACATATAACGTATATTTATATTACCTATCAACGAGGTTGGCTGTCTCCAACTACCATCAAAGAACATACTAACAGTTCACA	NaN
LPD1_59to88_30snps_2	Randomly_Mutated_Window	CCTTTGACTCACCTCGAATATATATAGATATATATATACATATAACGTATATTTATATGAGGCACTGAAGCCAGTGCCACACTGCAGATACCATCAAAGAACATACTAACAGTTCACA	7.87262
LPD1_89to118_30snps_1	Randomly_Mutated_Window	CCTTTGACTCACCTCGAATATATATAGATATATATATACATATAACGTATATTTATATATATACGGTTTTGTTCGATTGTCTCTGTCGGCGGTATCGTTGCGTCCAGCCTGCACACGT	7.68977
LPD1_89to118_30snps_2	Randomly_Mutated_Window	CCTTTGACTCACCTCGAATATATATAGATATATATATACATATAACGTATATTTATATATATACGGTTTTGTTCGATTGTCTCTGTCGAGGATGGGTGAGGTTGGAGTTGCTGAGTAT	NaN
RPA12_1to28_30snps_1	Randomly_Mutated_Window	CGTTTCCGCCGTGGCGCGGTTCCTGCTATTATGTCAAGTGAAGGGCATTGCATGGCAAGTGTAAAGAATCCAAGAAGAAAAGAAAGGCTTAAAGCAATCCAGGTTAGTACTTATAAGA	NaN
RPA12_1to28_30snps_2	Randomly_Mutated_Window	TTGCCCGACCCTGTCGCTTGGTAACCTATTATGTCAAGTGAAGGGCATTGCATGGCAAGTGTAAAGAATCCAAGAAGAAAAGAAAGGCTTAAAGCAATCCAGGTTAGTACTTATAAGA	6.95932
RPA12_29to58_30snps_1	Randomly_Mutated_Window	AAAAATATGAAAAAAAAAAAAATCAAATCCGACGTCGAGTTGCTTTCGGTGCGACGGTGTGTAAAGAATCCAAGAAGAAAAGAAAGGCTTAAAGCAATCCAGGTTAGTACTTATAAGA	6.23505
RPA12_29to58_30snps_2	Randomly_Mutated_Window	AAAAATATGAAAAAAAAAAAAATCAAATAGCCCAGGGAGACCTAAGCAATGGACCTGTGTGTAAAGAATCCAAGAAGAAAAGAAAGGCTTAAAGCAATCCAGGTTAGTACTTATAAGA	5.34897
RPA12_59to88_30snps_1	Randomly_Mutated_Window	AAAAATATGAAAAAAAAAAAAATCAAATTTATGTCAAGTGAAGGGCATTGCATGGCAACCTCTGCATTATTCTTCGTTCGTTGTGTTGTTAAAGCAATCCAGGTTAGTACTTATAAGA	6.8124
RPA12_59to88_30snps_2	Randomly_Mutated_Window	AAAAATATGAAAAAAAAAAAAATCAAATTTATGTCAAGTGAAGGGCATTGCATGGCAAACTCTCTTTCGAGCCTTTTTGCGTCGTTCTTTAAAGCAATCCAGGTTAGTACTTATAAGA	6.026
RPA12_89to118_30snps_1	Randomly_Mutated_Window	AAAAATATGAAAAAAAAAAAAATCAAATTTATGTCAAGTGAAGGGCATTGCATGGCAAGTGTAAAGAATCCAAGAAGAAAAGAAAGGCGGTCCCGCTCGACTTCGTCGTTAATCGGTG	4.49061
RPA12_89to118_30snps_2	Randomly_Mutated_Window	AAAAATATGAAAAAAAAAAAAATCAAATTTATGTCAAGTGAAGGGCATTGCATGGCAAGTGTAAAGAATCCAAGAAGAAAAGAAAGGCAGTGGCGTTGGACCCCACTCTACGCAGTCT	3.78419
INH1_1to28_30snps_1	Randomly_Mutated_Window	CTAAAATGACTCGTTCACAGAGTCCACCGTTCGTGGTTGAATTTGTTTTTGCTATCCCAAAGGAGTGCATTTTACACGCATTACTACAGCACACTTTTATACAGTTCCACAATAGAAT	NaN
INH1_1to28_30snps_2	Randomly_Mutated_Window	GCCAACCCGCGCCCTGCGGCACCCGGCGGTTCGTGGTTGAATTTGTTTTTGCTATCCCAAAGGAGTGCATTTTACACGCATTACTACAGCACACTTTTATACAGTTCCACAATAGAAT	1.93981
INH1_29to58_30snps_1	Randomly_Mutated_Window	TATCTTGTTTAAAACTTTCTTTGAATTTCCGGACTCAGAGTACACGACAGTGGTCAGGAAAGGAGTGCATTTTACACGCATTACTACAGCACACTTTTATACAGTTCCACAATAGAAT	5.80706
INH1_29to58_30snps_2	Randomly_Mutated_Window	TATCTTGTTTAAAACTTTCTTTGAATTTTCGTAATTCGTCCAAGCACGCATGATAAGTAAAGGAGTGCATTTTACACGCATTACTACAGCACACTTTTATACAGTTCCACAATAGAAT	7.1878
INH1_59to88_30snps_1	Randomly_Mutated_Window	TATCTTGTTTAAAACTTTCTTTGAATTTGTTCGTGGTTGAATTTGTTTTTGCTATCCCGCTATGAGTTCAAACGGTAAGCCAGAAGGTGCACACTTTTATACAGTTCCACAATAGAAT	6.18174
INH1_59to88_30snps_2	Randomly_Mutated_Window	TATCTTGTTTAAAACTTTCTTTGAATTTGTTCGTGGTTGAATTTGTTTTTGCTATCCCGGTCTTAGCTGCGACTTGGAGGCACTGTGCGCACACTTTTATACAGTTCCACAATAGAAT	5.9703
INH1_89to118_30snps_1	Randomly_Mutated_Window	TATCTTGTTTAAAACTTTCTTTGAATTTGTTCGTGGTTGAATTTGTTTTTGCTATCCCAAAGGAGTGCATTTTACACGCATTACTACACTCTTTAGGGCAGTGTAATGGGGTCCCTCA	NaN
INH1_89to118_30snps_2	Randomly_Mutated_Window	TATCTTGTTTAAAACTTTCTTTGAATTTGTTCGTGGTTGAATTTGTTTTTGCTATCCCAAAGGAGTGCATTTTACACGCATTACTACACTTTTAACAGTCTTCAAGATGTTTGTTCGA	NaN
VRG4_1to28_30snps_1	Randomly_Mutated_Window	ATTGCAGAGCTGTATCTTATTCAGCTCGTCTTGTTGCCGATTAATTGTTGACATCCTCTTAATTACCAAAAGAGCCTAAGAAAACAAACACACTAACCACACAGTATCTTTCGCCCGA	7.22279
VRG4_1to28_30snps_2	Randomly_Mutated_Window	AGTGTATCCCCGTCGGCAGGCATTCTAATCTTGTTGCCGATTAATTGTTGACATCCTCTTAATTACCAAAAGAGCCTAAGAAAACAAACACACTAACCACACAGTATCTTTCGCCCGA	5.11654
VRG4_29to58_30snps_1	Randomly_Mutated_Window	GAATATATATAACGCTGCCAAGCCTATTCGAGAACCAAATAGGGAATACAGGTGGTGATTAATTACCAAAAGAGCCTAAGAAAACAAACACACTAACCACACAGTATCTTTCGCCCGA	7.85895
VRG4_29to58_30snps_2	Randomly_Mutated_Window	GAATATATATAACGCTGCCAAGCCTATTCACCAACCTGTCGAGTCAAAGATTCCTTGTTTAATTACCAAAAGAGCCTAAGAAAACAAACACACTAACCACACAGTATCTTTCGCCCGA	NaN
VRG4_59to88_30snps_1	Randomly_Mutated_Window	GAATATATATAACGCTGCCAAGCCTATTTCTTGTTGCCGATTAATTGTTGACATCCTCGCTTGGTAACCGCCTTTACGTTTTGCGGCGCACACTAACCACACAGTATCTTTCGCCCGA	5.59878
VRG4_59to88_30snps_2	Randomly_Mutated_Window	GAATATATATAACGCTGCCAAGCCTATTTCTTGTTGCCGATTAATTGTTGACATCCTCCATTACCTGTGGGAGAAGGGCTTGGTATGTCACACTAACCACACAGTATCTTTCGCCCGA	4.33741
VRG4_89to118_30snps_1	Randomly_Mutated_Window	GAATATATATAACGCTGCCAAGCCTATTTCTTGTTGCCGATTAATTGTTGACATCCTCTTAATTACCAAAAGAGCCTAAGAAAACAAAATAGAGCTTTTGGGTCGGATCCATTTATTC	11.4616
VRG4_89to118_30snps_2	Randomly_Mutated_Window	GAATATATATAACGCTGCCAAGCCTATTTCTTGTTGCCGATTAATTGTTGACATCCTCTTAATTACCAAAAGAGCCTAAGAAAACAAATCGCAGTCGGCATGCACTGGAAGGAAGATC	NaN
ATP18_1to28_30snps_1	Randomly_Mutated_Window	GGTTCGGTTATATATACTGCAGAGGCATACAATCAGCTGAGATGTGTTGAGAAGAGTTCGACTCAGATATCGTTAGTTTAACATACGACGACAGATTAATTGATTGGATTGTACTGCC	10.4798
ATP18_1to28_30snps_2	Randomly_Mutated_Window	AGTTCTTCCGAGCCCTTCTGAGGCTAATACAATCAGCTGAGATGTGTTGAGAAGAGTTCGACTCAGATATCGTTAGTTTAACATACGACGACAGATTAATTGATTGGATTGTACTGCC	4.1606
ATP18_29to58_30snps_1	Randomly_Mutated_Window	TTAAAAAGGCCTAGAGAAAATATAAGGAGTGCAATATCTTACACGAAATCTGGATTAGCGACTCAGATATCGTTAGTTTAACATACGACGACAGATTAATTGATTGGATTGTACTGCC	8.14683
ATP18_29to58_30snps_2	Randomly_Mutated_Window	TTAAAAAGGCCTAGAGAAAATATAAGGATGCGCTCTTAAGTCCAACCGCTCCCAGACACGACTCAGATATCGTTAGTTTAACATACGACGACAGATTAATTGATTGGATTGTACTGCC	7.72481
ATP18_59to88_30snps_1	Randomly_Mutated_Window	TTAAAAAGGCCTAGAGAAAATATAAGGAACAATCAGCTGAGATGTGTTGAGAAGAGTTTATACATACCGCGAGCCTCGCTGACCTGTCCGACAGATTAATTGATTGGATTGTACTGCC	5.3315
ATP18_59to88_30snps_2	Randomly_Mutated_Window	TTAAAAAGGCCTAGAGAAAATATAAGGAACAATCAGCTGAGATGTGTTGAGAAGAGTTACTTAACCTCGAATCACTACGGGTTCCATTCGACAGATTAATTGATTGGATTGTACTGCC	6.33872
ATP18_89to118_30snps_1	Randomly_Mutated_Window	TTAAAAAGGCCTAGAGAAAATATAAGGAACAATCAGCTGAGATGTGTTGAGAAGAGTTCGACTCAGATATCGTTAGTTTAACATACGAATGGCAGCACGGCCCAAACTCATAGAGCGT	NaN
ATP18_89to118_30snps_2	Randomly_Mutated_Window	TTAAAAAGGCCTAGAGAAAATATAAGGAACAATCAGCTGAGATGTGTTGAGAAGAGTTCGACTCAGATATCGTTAGTTTAACATACGAGACAGTTAGTGCCCGCACACAGCGCTGCAT	5.03568
RIP1_1to28_30snps_1	Randomly_Mutated_Window	GGTATGAAACTTCACAAAAGTGAGGGCGGTTCAACGTCTTTTAAAAACCAAGAAATTATTGAACATAAATAATATCACTCTAACACTTATTAGGAAACCGAAAGGAGCAATAACAAAC	8.86308
RIP1_1to28_30snps_2	Randomly_Mutated_Window	TCTGCCGAGCTGCCACGTAAAACGCGTCGTTCAACGTCTTTTAAAAACCAAGAAATTATTGAACATAAATAATATCACTCTAACACTTATTAGGAAACCGAAAGGAGCAATAACAAAC	9.68777
RIP1_29to58_30snps_1	Randomly_Mutated_Window	CTCTGTCGTAACTTTTTGTTGCTTTCAAAGGGGCGTAGGAGATTTGTATGCTTTCAATTTGAACATAAATAATATCACTCTAACACTTATTAGGAAACCGAAAGGAGCAATAACAAAC	7.42177
RIP1_29to58_30snps_2	Randomly_Mutated_Window	CTCTGTCGTAACTTTTTGTTGCTTTCAACGCTCCGAGACAACGCTTGAACGACCTCATTTGAACATAAATAATATCACTCTAACACTTATTAGGAAACCGAAAGGAGCAATAACAAAC	8.16865
RIP1_59to88_30snps_1	Randomly_Mutated_Window	CTCTGTCGTAACTTTTTGTTGCTTTCAAGTTCAACGTCTTTTAAAAACCAAGAAATTAAACCCAGCCGGGGTCCAATGGACTTACTAGATTAGGAAACCGAAAGGAGCAATAACAAAC	4.85363
RIP1_59to88_30snps_2	Randomly_Mutated_Window	CTCTGTCGTAACTTTTTGTTGCTTTCAAGTTCAACGTCTTTTAAAAACCAAGAAATTAGGAGCGTGGCCATTGCAACAAACTCGGAACATTAGGAAACCGAAAGGAGCAATAACAAAC	8.87533
RIP1_89to118_30snps_1	Randomly_Mutated_Window	CTCTGTCGTAACTTTTTGTTGCTTTCAAGTTCAACGTCTTTTAAAAACCAAGAAATTATTGAACATAAATAATATCACTCTAACACTTGCGTCAGCTAGAGTTTTCTAGTAGGAGGCG	5.9591
RIP1_89to118_30snps_2	Randomly_Mutated_Window	CTCTGTCGTAACTTTTTGTTGCTTTCAAGTTCAACGTCTTTTAAAAACCAAGAAATTATTGAACATAAATAATATCACTCTAACACTTGGCTTCTTTAGATGGATTTGCTATGGTTTA	NaN
UGA3_1to28_30snps_1	Randomly_Mutated_Window	TAAAGGACCAGAGGATGTTGCGGCTGTGTTACAATAAGAGTCTTACTTAAGATGATATAGAATTGTTGTTATTGTTCATGTATGGATGCCAAGAAAACAAAGTTTTTTAAAGTGAGGT	4.96441
UGA3_1to28_30snps_2	Randomly_Mutated_Window	GTCAGTGATAGACCGCCGCCGTGGACGTTTACAATAAGAGTCTTACTTAAGATGATATAGAATTGTTGTTATTGTTCATGTATGGATGCCAAGAAAACAAAGTTTTTTAAAGTGAGGT	5.52499
UGA3_29to58_30snps_1	Randomly_Mutated_Window	AGGGTCTGAGTCATCAAAGAAAAAGAAAAGCACCAGCAGCGAAAGAACTTAGGTCCCCAGAATTGTTGTTATTGTTCATGTATGGATGCCAAGAAAACAAAGTTTTTTAAAGTGAGGT	3.73703
UGA3_29to58_30snps_2	Randomly_Mutated_Window	AGGGTCTGAGTCATCAAAGAAAAAGAAACACTCTCGCTTCCTCACGGGCTCCAACGGCAGAATTGTTGTTATTGTTCATGTATGGATGCCAAGAAAACAAAGTTTTTTAAAGTGAGGT	2.57739
UGA3_59to88_30snps_1	Randomly_Mutated_Window	AGGGTCTGAGTCATCAAAGAAAAAGAAATTACAATAAGAGTCTTACTTAAGATGATATCCGGAGAGGCCGTCATAGTTACCCCCCTCACCAAGAAAACAAAGTTTTTTAAAGTGAGGT	1.04275
UGA3_59to88_30snps_2	Randomly_Mutated_Window	AGGGTCTGAGTCATCAAAGAAAAAGAAATTACAATAAGAGTCTTACTTAAGATGATATTCTCCCAACCGCCAATCCGCCCAGGCAGAACCAAGAAAACAAAGTTTTTTAAAGTGAGGT	5.58652
UGA3_89to118_30snps_1	Randomly_Mutated_Window	AGGGTCTGAGTCATCAAAGAAAAAGAAATTACAATAAGAGTCTTACTTAAGATGATATAGAATTGTTGTTATTGTTCATGTATGGATGAGTTTGGGGACCCTCACCGGGGCTGAGATC	2.38453
UGA3_89to118_30snps_2	Randomly_Mutated_Window	AGGGTCTGAGTCATCAAAGAAAAAGAAATTACAATAAGAGTCTTACTTAAGATGATATAGAATTGTTGTTATTGTTCATGTATGGATGGATGCCGGCACTGACGACAAGTCCCCTATG	NaN
CEG1_1to28_30snps_1	Randomly_Mutated_Window	GCGCTTGCTCACTGGGATCTGTGTCGCGGAAAGAAATGGTGGAATACGATCTGTTATATCTAAACTAAAGCTAACTAACGGAATAAGCAAATACGAATCGACCGCTAATTTAACAAAT	5.31153
CEG1_1to28_30snps_2	Randomly_Mutated_Window	CTTGCGGCTTGCTTAGAGGCGTTCCGCGGAAAGAAATGGTGGAATACGATCTGTTATATCTAAACTAAAGCTAACTAACGGAATAAGCAAATACGAATCGACCGCTAATTTAACAAAT	3.74322
CEG1_29to58_30snps_1	Randomly_Mutated_Window	TAATAAATAGTTCATTGCAGAAAATAACACGGTGGCCACGTCCCGGGTTGTCAGGTGTTCTAAACTAAAGCTAACTAACGGAATAAGCAAATACGAATCGACCGCTAATTTAACAAAT	NaN
CEG1_29to58_30snps_2	Randomly_Mutated_Window	TAATAAATAGTTCATTGCAGAAAATAACTCCGCTCCAATCTCGCGGACCCTGTGGCACTCTAAACTAAAGCTAACTAACGGAATAAGCAAATACGAATCGACCGCTAATTTAACAAAT	8.41637
CEG1_59to88_30snps_1	Randomly_Mutated_Window	TAATAAATAGTTCATTGCAGAAAATAACGAAAGAAATGGTGGAATACGATCTGTTATAATGTTGAGCGTTGCTGTCCTGTTGCATTTGAAATACGAATCGACCGCTAATTTAACAAAT	5.42114
CEG1_59to88_30snps_2	Randomly_Mutated_Window	TAATAAATAGTTCATTGCAGAAAATAACGAAAGAAATGGTGGAATACGATCTGTTATAATGCTGTGCTTCGAGTAACCATTTTGGGCTAAATACGAATCGACCGCTAATTTAACAAAT	5.78371
CEG1_89to118_30snps_1	Randomly_Mutated_Window	TAATAAATAGTTCATTGCAGAAAATAACGAAAGAAATGGTGGAATACGATCTGTTATATCTAAACTAAAGCTAACTAACGGAATAAGCCTGATGATTGACTTGCAGCGCACCTGCCTG	NaN
CEG1_89to118_30snps_2	Randomly_Mutated_Window	TAATAAATAGTTCATTGCAGAAAATAACGAAAGAAATGGTGGAATACGATCTGTTATATCTAAACTAAAGCTAACTAACGGAATAAGCCGGGCATGTAAAGTTCGCTTAACCTGGCCG	NaN
PRS4_1to28_30snps_1	Randomly_Mutated_Window	TCTCCCATGGACACGCCTGTGAGACCCATCCTATATGGTCATCGACCTTGAGCATGTGGTAGACTACATAATGCACATAGACTCTCAGCTTCAACTCCACAAGGCTTCTCCAGCAAAA	NaN
PRS4_1to28_30snps_2	Randomly_Mutated_Window	TGCCCTCGGACGGCGTTTACGCAATCTCTCCTATATGGTCATCGACCTTGAGCATGTGGTAGACTACATAATGCACATAGACTCTCAGCTTCAACTCCACAAGGCTTCTCCAGCAAAA	4.21252
PRS4_29to58_30snps_1	Randomly_Mutated_Window	GAAAAATCCTGACGAAAATATTTCAAGGCGTGTATAAAATCGATGTGCGAGCGTGCACGTAGACTACATAATGCACATAGACTCTCAGCTTCAACTCCACAAGGCTTCTCCAGCAAAA	7.68984
PRS4_29to58_30snps_2	Randomly_Mutated_Window	GAAAAATCCTGACGAAAATATTTCAAGGCGAAGCCGACATCCGTGTGCGTTATCCTATGTAGACTACATAATGCACATAGACTCTCAGCTTCAACTCCACAAGGCTTCTCCAGCAAAA	4.28502
PRS4_59to88_30snps_1	Randomly_Mutated_Window	GAAAAATCCTGACGAAAATATTTCAAGGTCCTATATGGTCATCGACCTTGAGCATGTGACCTCGCTACGGCATGGTCGCTGTATGAGTCTTCAACTCCACAAGGCTTCTCCAGCAAAA	2.69564
PRS4_59to88_30snps_2	Randomly_Mutated_Window	GAAAAATCCTGACGAAAATATTTCAAGGTCCTATATGGTCATCGACCTTGAGCATGTGACGTCGAGTGGTTGATGACACTTACGGGGACTTCAACTCCACAAGGCTTCTCCAGCAAAA	3.3693
PRS4_89to118_30snps_1	Randomly_Mutated_Window	GAAAAATCCTGACGAAAATATTTCAAGGTCCTATATGGTCATCGACCTTGAGCATGTGGTAGACTACATAATGCACATAGACTCTCAGGCCACTACAGCGCCTTACGTGGTCCTCGTG	1.2673
PRS4_89to118_30snps_2	Randomly_Mutated_Window	GAAAAATCCTGACGAAAATATTTCAAGGTCCTATATGGTCATCGACCTTGAGCATGTGGTAGACTACATAATGCACATAGACTCTCAGACAGGCTAAATATTATAAGAAGGCATTGCT	4.60412
PAP1_1to28_30snps_1	Randomly_Mutated_Window	TACAGTGTTTTGGATAGGTCGCCAGGTTTGTGAGCAAGTCTTTAAACGGTCTTTTTTGAATCAAAAGAGGCCTAGAATTAGCAAAATATTTAACGCATAAACTTTTTTTAGACAAATA	4.06498
PAP1_1to28_30snps_2	Randomly_Mutated_Window	CCCGTTATTTTATCGATGTGCTCACGTTTGTGAGCAAGTCTTTAAACGGTCTTTTTTGAATCAAAAGAGGCCTAGAATTAGCAAAATATTTAACGCATAAACTTTTTTTAGACAAATA	NaN
PAP1_29to58_30snps_1	Randomly_Mutated_Window	AGACACTAAACTAGCTAAATAATTTCACACGATTTTTTGTAACGCCTTACGCCCCGGTAATCAAAAGAGGCCTAGAATTAGCAAAATATTTAACGCATAAACTTTTTTTAGACAAATA	NaN
PAP1_29to58_30snps_2	Randomly_Mutated_Window	AGACACTAAACTAGCTAAATAATTTCACGTGTTTGGCACGCAGCTTTTTCACACCCCAAATCAAAAGAGGCCTAGAATTAGCAAAATATTTAACGCATAAACTTTTTTTAGACAAATA	4.8011
PAP1_59to88_30snps_1	Randomly_Mutated_Window	AGACACTAAACTAGCTAAATAATTTCACTGTGAGCAAGTCTTTAAACGGTCTTTTTTGCGGGTGTGAGCCGACCTGCGCTAGGTTGGTTTTAACGCATAAACTTTTTTTAGACAAATA	NaN
PAP1_59to88_30snps_2	Randomly_Mutated_Window	AGACACTAAACTAGCTAAATAATTTCACTGTGAGCAAGTCTTTAAACGGTCTTTTTTGTCGACTGTTGTTGTAGATCAAGTTTCGCGTTTTAACGCATAAACTTTTTTTAGACAAATA	NaN
PAP1_89to118_30snps_1	Randomly_Mutated_Window	AGACACTAAACTAGCTAAATAATTTCACTGTGAGCAAGTCTTTAAACGGTCTTTTTTGAATCAAAAGAGGCCTAGAATTAGCAAAATACACTCTTTTGTTCAAAGAACAGTTTCCGGC	NaN
PAP1_89to118_30snps_2	Randomly_Mutated_Window	AGACACTAAACTAGCTAAATAATTTCACTGTGAGCAAGTCTTTAAACGGTCTTTTTTGAATCAAAAGAGGCCTAGAATTAGCAAAATAAGACTGCGCCGTTGCCCACCCCTTACTTAC	NaN
YOL002C_1to28_30snps_1	Randomly_Mutated_Window	AGTGGTCTATAGGCGGCGTCCATCCGCCAATAGTATTTATGTCAGCGTTCCTTGAGCCAAATGTACTAAATTTCCCGTCGTTTTAATTATGCTGCATGTTGGAGAAGAATCATTCCAA	NaN
YOL002C_1to28_30snps_2	Randomly_Mutated_Window	GAGTTGGGCACAAACGCGTGTCGGCCCCAATAGTATTTATGTCAGCGTTCCTTGAGCCAAATGTACTAAATTTCCCGTCGTTTTAATTATGCTGCATGTTGGAGAAGAATCATTCCAA	NaN
YOL002C_29to58_30snps_1	Randomly_Mutated_Window	CCAACATCTCTTCGAATAGTAGATTAGATTAGAGTGGGCACGAGTGCCAGAGATGATGAAATGTACTAAATTTCCCGTCGTTTTAATTATGCTGCATGTTGGAGAAGAATCATTCCAA	NaN
YOL002C_29to58_30snps_2	Randomly_Mutated_Window	CCAACATCTCTTCGAATAGTAGATTAGATGCTAACGGCCCCCATATCAAAGAACGCAGAAATGTACTAAATTTCCCGTCGTTTTAATTATGCTGCATGTTGGAGAAGAATCATTCCAA	NaN
YOL002C_59to88_30snps_1	Randomly_Mutated_Window	CCAACATCTCTTCGAATAGTAGATTAGAAATAGTATTTATGTCAGCGTTCCTTGAGCCTTGGCGTTGCTTGAATATTATACCAACGACATGCTGCATGTTGGAGAAGAATCATTCCAA	NaN
YOL002C_59to88_30snps_2	Randomly_Mutated_Window	CCAACATCTCTTCGAATAGTAGATTAGAAATAGTATTTATGTCAGCGTTCCTTGAGCCGTTATCGACTCGACGTTACCGCACGGCCCAATGCTGCATGTTGGAGAAGAATCATTCCAA	NaN
YOL002C_89to118_30snps_1	Randomly_Mutated_Window	CCAACATCTCTTCGAATAGTAGATTAGAAATAGTATTTATGTCAGCGTTCCTTGAGCCAAATGTACTAAATTTCCCGTCGTTTTAATTGGCTCATTATAGTAGCCTAGGCGTCGGTGT	6.468
YOL002C_89to118_30snps_2	Randomly_Mutated_Window	CCAACATCTCTTCGAATAGTAGATTAGAAATAGTATTTATGTCAGCGTTCCTTGAGCCAAATGTACTAAATTTCCCGTCGTTTTAATTGAAACAGCCTGCCTTATTAGGCATGAGTCC	NaN
RBK1_1to28_30snps_1	Randomly_Mutated_Window	ATTGCGCGCATCCCATAGCGGCCTTAGCGCCAGAACAATCATGAAGCAAATAGGATAAAAATAGCCAATAAGATGTTTGTTGTCTTTCATCCCAAAGTTCCAACAGCATATTTCAAAG	4.60022
RBK1_1to28_30snps_2	Randomly_Mutated_Window	TCTGAGCTGAACCCAGCTCGAATCTAGTGCCAGAACAATCATGAAGCAAATAGGATAAAAATAGCCAATAAGATGTTTGTTGTCTTTCATCCCAAAGTTCCAACAGCATATTTCAAAG	4.9051
RBK1_29to58_30snps_1	Randomly_Mutated_Window	GGAATAAAAGGGTTTATATCCGAAGGTGATGTCCCACTCGCCTTTATCTTGTTCGCCCAAATAGCCAATAAGATGTTTGTTGTCTTTCATCCCAAAGTTCCAACAGCATATTTCAAAG	5.34435
RBK1_29to58_30snps_2	Randomly_Mutated_Window	GGAATAAAAGGGTTTATATCCGAAGGTGAGAGCCGGTTCTCGTGGTGTTTGCCTGATCAAATAGCCAATAAGATGTTTGTTGTCTTTCATCCCAAAGTTCCAACAGCATATTTCAAAG	2.93097
RBK1_59to88_30snps_1	Randomly_Mutated_Window	GGAATAAAAGGGTTTATATCCGAAGGTGGCCAGAACAATCATGAAGCAAATAGGATAACGCAGCAAGCAGCCCGCAGATACTATACGTATCCCAAAGTTCCAACAGCATATTTCAAAG	4.81026
RBK1_59to88_30snps_2	Randomly_Mutated_Window	GGAATAAAAGGGTTTATATCCGAAGGTGGCCAGAACAATCATGAAGCAAATAGGATAACTCATTAAGTCGGTTGTCCATGCTGACCAAATCCCAAAGTTCCAACAGCATATTTCAAAG	2.3189
RBK1_89to118_30snps_1	Randomly_Mutated_Window	GGAATAAAAGGGTTTATATCCGAAGGTGGCCAGAACAATCATGAAGCAAATAGGATAAAAATAGCCAATAAGATGTTTGTTGTCTTTCTCGTTGGCAGGTTCCATCGCGTCCCTCTTT	1.09119
RBK1_89to118_30snps_2	Randomly_Mutated_Window	GGAATAAAAGGGTTTATATCCGAAGGTGGCCAGAACAATCATGAAGCAAATAGGATAAAAATAGCCAATAAGATGTTTGTTGTCTTTCGAAGACGCTAAGAGGTTATGAGGACACCTC	NaN
DLD1_1to28_30snps_1	Randomly_Mutated_Window	CGCGGGGACACCTATACGCCTCACAACAGGGCTGGAAAGATTTCTTGAGCTTCCGTGTTATAGTGCAATTTAAATATTGTACATCATTCCGATCCAGCTGGAAACAAAAGCAAGAACA	5.06044
DLD1_1to28_30snps_2	Randomly_Mutated_Window	GAACGATGTGGACCCCACTCCATGAACAGGGCTGGAAAGATTTCTTGAGCTTCCGTGTTATAGTGCAATTTAAATATTGTACATCATTCCGATCCAGCTGGAAACAAAAGCAAGAACA	5.65517
DLD1_29to58_30snps_1	Randomly_Mutated_Window	ATGTATATATATATGTGTGTGTGTGTGTCACAGAACTTTCGGAGGCTCATGGTATCTATATAGTGCAATTTAAATATTGTACATCATTCCGATCCAGCTGGAAACAAAAGCAAGAACA	12.7072
DLD1_29to58_30snps_2	Randomly_Mutated_Window	ATGTATATATATATGTGTGTGTGTGTGTCACTGCTCCCAGCAGGCCCGATAGTTTATCTATAGTGCAATTTAAATATTGTACATCATTCCGATCCAGCTGGAAACAAAAGCAAGAACA	12.7104
DLD1_59to88_30snps_1	Randomly_Mutated_Window	ATGTATATATATATGTGTGTGTGTGTGTGGGCTGGAAAGATTTCTTGAGCTTCCGTGTACGCAGAAGTAGCTCGGGGATCTGGGTCGACCGATCCAGCTGGAAACAAAAGCAAGAACA	5.85976
DLD1_59to88_30snps_2	Randomly_Mutated_Window	ATGTATATATATATGTGTGTGTGTGTGTGGGCTGGAAAGATTTCTTGAGCTTCCGTGTAGACACCACCACGTTTATAGCGCGTGATGCCCGATCCAGCTGGAAACAAAAGCAAGAACA	NaN
DLD1_89to118_30snps_1	Randomly_Mutated_Window	ATGTATATATATATGTGTGTGTGTGTGTGGGCTGGAAAGATTTCTTGAGCTTCCGTGTTATAGTGCAATTTAAATATTGTACATCATTTTTCGGTTTTGAATGCGGTCGCTTCCCCGC	NaN
DLD1_89to118_30snps_2	Randomly_Mutated_Window	ATGTATATATATATGTGTGTGTGTGTGTGGGCTGGAAAGATTTCTTGAGCTTCCGTGTTATAGTGCAATTTAAATATTGTACATCATTTATCGAACCAGAAGCTTCCGTTTGTTCGGG	13.18
YLR005W_1to28_30snps_1	Randomly_Mutated_Window	GGAACCGTCAAAATGTCCATAAATCGTTGTCTTCATCTTATCTTATATAGATGCAGGTGATTACTAGTGGGGCAAGTCGGCAGCTAATTGCGTGTGTGCGGAAGGATTGTGCAGTAGA	6.05527
YLR005W_1to28_30snps_2	Randomly_Mutated_Window	GGCATACCCCCGATTGTTATGTGCCCCTGTCTTCATCTTATCTTATATAGATGCAGGTGATTACTAGTGGGGCAAGTCGGCAGCTAATTGCGTGTGTGCGGAAGGATTGTGCAGTAGA	4.77002
YLR005W_29to58_30snps_1	Randomly_Mutated_Window	TTGTATAGTTTTTCAAGATACGTAAAAGCGGGCGTAAGCTGAAAGCCATCCACTCCTGGATTACTAGTGGGGCAAGTCGGCAGCTAATTGCGTGTGTGCGGAAGGATTGTGCAGTAGA	3.3954
YLR005W_29to58_30snps_2	Randomly_Mutated_Window	TTGTATAGTTTTTCAAGATACGTAAAAGTAAAGTCAACGCAGAGGCGGTACATGCTAGGATTACTAGTGGGGCAAGTCGGCAGCTAATTGCGTGTGTGCGGAAGGATTGTGCAGTAGA	NaN
YLR005W_59to88_30snps_1	Randomly_Mutated_Window	TTGTATAGTTTTTCAAGATACGTAAAAGGTCTTCATCTTATCTTATATAGATGCAGGTCGAGCTCTTGCCTCAGCAGATATTTAATCCTGCGTGTGTGCGGAAGGATTGTGCAGTAGA	4.67777
YLR005W_59to88_30snps_2	Randomly_Mutated_Window	TTGTATAGTTTTTCAAGATACGTAAAAGGTCTTCATCTTATCTTATATAGATGCAGGTATCCCGATTGAACAATTTGTTCTGTGACCCTGCGTGTGTGCGGAAGGATTGTGCAGTAGA	6.08033
YLR005W_89to118_30snps_1	Randomly_Mutated_Window	TTGTATAGTTTTTCAAGATACGTAAAAGGTCTTCATCTTATCTTATATAGATGCAGGTGATTACTAGTGGGGCAAGTCGGCAGCTAATCAGTGCAACAGTTCGCTTCCTCCTTCGGTC	4.9907
YLR005W_89to118_30snps_2	Randomly_Mutated_Window	TTGTATAGTTTTTCAAGATACGTAAAAGGTCTTCATCTTATCTTATATAGATGCAGGTGATTACTAGTGGGGCAAGTCGGCAGCTAATCCGTGAGTCTTAAGCTTGAAACAACCGGCG	5.19221
GSH2_1to28_30snps_1	Randomly_Mutated_Window	ATTAAACAACAGCCCCATCTTGAAATCACCAAATCAACCACATCCATATACGATCCTCCAAAGGTAGCAAAGTGCCACTTCAAGCAATTATAGGAAGAAAGCACTACTCCTATAAAAT	7.34332
GSH2_1to28_30snps_2	Randomly_Mutated_Window	ACGTGGGGGGCTGGGTCAGTCGACATAACCAAATCAACCACATCCATATACGATCCTCCAAAGGTAGCAAAGTGCCACTTCAAGCAATTATAGGAAGAAAGCACTACTCCTATAAAAT	5.36658
GSH2_29to58_30snps_1	Randomly_Mutated_Window	GAACCTTCTTGAATTATCTAAATGTCTCTACCCCATCTGTACCAGGCTAGGTCATTGTCAAAGGTAGCAAAGTGCCACTTCAAGCAATTATAGGAAGAAAGCACTACTCCTATAAAAT	6.4359
GSH2_29to58_30snps_2	Randomly_Mutated_Window	GAACCTTCTTGAATTATCTAAATGTCTCATCGCATTTAACGCAGACCCGGACGGTGCACAAAGGTAGCAAAGTGCCACTTCAAGCAATTATAGGAAGAAAGCACTACTCCTATAAAAT	6.52501
GSH2_59to88_30snps_1	Randomly_Mutated_Window	GAACCTTCTTGAATTATCTAAATGTCTCCCAAATCAACCACATCCATATACGATCCTCTGGCTCGGCGGGTACAGAGAAGACCCGCTGTATAGGAAGAAAGCACTACTCCTATAAAAT	4.36786
GSH2_59to88_30snps_2	Randomly_Mutated_Window	GAACCTTCTTGAATTATCTAAATGTCTCCCAAATCAACCACATCCATATACGATCCTCATGCTTGGCGTGTTCAGGTGAAACGAGCTCTATAGGAAGAAAGCACTACTCCTATAAAAT	4.27584
GSH2_89to118_30snps_1	Randomly_Mutated_Window	GAACCTTCTTGAATTATCTAAATGTCTCCCAAATCAACCACATCCATATACGATCCTCCAAAGGTAGCAAAGTGCCACTTCAAGCAATATATCCCCCTCTTTTTGCGCAAAGGCTTGG	NaN
GSH2_89to118_30snps_2	Randomly_Mutated_Window	GAACCTTCTTGAATTATCTAAATGTCTCCCAAATCAACCACATCCATATACGATCCTCCAAAGGTAGCAAAGTGCCACTTCAAGCAATCGCCTCTCATCCCTTGATTGGGATGCCCTC	NaN
IDP1_1to28_30snps_1	Randomly_Mutated_Window	TTAGTCCCCGGTTTAATATAGCACGTGATTGCCCATATAAAGAGGGACTCATATGATCTTATGAAATCTTCCTTCAAGCAATTGTGAGACAACAGACGCACAAGGAAGATCGCCCAGC	NaN
IDP1_1to28_30snps_2	Randomly_Mutated_Window	AGAAAAGACCGACTCTCGCGGGAGTTCTTTGCCCATATAAAGAGGGACTCATATGATCTTATGAAATCTTCCTTCAAGCAATTGTGAGACAACAGACGCACAAGGAAGATCGCCCAGC	5.91511
IDP1_29to58_30snps_1	Randomly_Mutated_Window	GCGCGGATTTTGACTCACATAATTCCACCACGAGGGCGTGCTCCCTTGGAGGGGCCCATTATGAAATCTTCCTTCAAGCAATTGTGAGACAACAGACGCACAAGGAAGATCGCCCAGC	2.68274
IDP1_29to58_30snps_2	Randomly_Mutated_Window	GCGCGGATTTTGACTCACATAATTCCACGCTAGAGGCCCGCATTTCCTCGCCTCCCCGTTATGAAATCTTCCTTCAAGCAATTGTGAGACAACAGACGCACAAGGAAGATCGCCCAGC	1.41032
IDP1_59to88_30snps_1	Randomly_Mutated_Window	GCGCGGATTTTGACTCACATAATTCCACTTGCCCATATAAAGAGGGACTCATATGATCGGCATCGGGTCGGGGATGGATGGCGAGCGAACAACAGACGCACAAGGAAGATCGCCCAGC	6.59113
IDP1_59to88_30snps_2	Randomly_Mutated_Window	GCGCGGATTTTGACTCACATAATTCCACTTGCCCATATAAAGAGGGACTCATATGATCAACGACTTCACAGAGGGCCAGGGGACCTGAACAACAGACGCACAAGGAAGATCGCCCAGC	8.08999
IDP1_89to118_30snps_1	Randomly_Mutated_Window	GCGCGGATTTTGACTCACATAATTCCACTTGCCCATATAAAGAGGGACTCATATGATCTTATGAAATCTTCCTTCAAGCAATTGTGAGGTTGTCCGAAGTGGTTCTGCTCGAGTACCG	11.1585
IDP1_89to118_30snps_2	Randomly_Mutated_Window	GCGCGGATTTTGACTCACATAATTCCACTTGCCCATATAAAGAGGGACTCATATGATCTTATGAAATCTTCCTTCAAGCAATTGTGAGGGCTTGACGTTGTGGATGGACGGCGAACCT	NaN
GDB1_1to28_30snps_1	Randomly_Mutated_Window	TGGATCGGATGAGCGTATGTACCTCTTTTGTACTTGAAGTCACTCATATCCGAATACTACTTCTCTTAACTTCCAGTCAACCCGACACCCACAATCGTCCTTAGTATATAACTGCTTT	4.14151
GDB1_1to28_30snps_2	Randomly_Mutated_Window	CGCCTCGTCCCAGATCACCTGCGTTTCATGTACTTGAAGTCACTCATATCCGAATACTACTTCTCTTAACTTCCAGTCAACCCGACACCCACAATCGTCCTTAGTATATAACTGCTTT	3.904
GDB1_29to58_30snps_1	Randomly_Mutated_Window	ATATATACTAACCTCGTATATTACACACCTCCTCCTGTTCGGTGGGAGGTGTCGCGTCACTTCTCTTAACTTCCAGTCAACCCGACACCCACAATCGTCCTTAGTATATAACTGCTTT	2.37263
GDB1_29to58_30snps_2	Randomly_Mutated_Window	ATATATACTAACCTCGTATATTACACACAACTAAGTTGCGTGACAGATGAGCCTCGTCACTTCTCTTAACTTCCAGTCAACCCGACACCCACAATCGTCCTTAGTATATAACTGCTTT	2.4137
GDB1_59to88_30snps_1	Randomly_Mutated_Window	ATATATACTAACCTCGTATATTACACACTGTACTTGAAGTCACTCATATCCGAATACTCAGCTAAGGCGTGCTTGTGTCTAAACCTGACCACAATCGTCCTTAGTATATAACTGCTTT	4.91167
GDB1_59to88_30snps_2	Randomly_Mutated_Window	ATATATACTAACCTCGTATATTACACACTGTACTTGAAGTCACTCATATCCGAATACTGGGCTATCGCCGCGGGTCGAGCAGATGATACCACAATCGTCCTTAGTATATAACTGCTTT	1.48481
GDB1_89to118_30snps_1	Randomly_Mutated_Window	ATATATACTAACCTCGTATATTACACACTGTACTTGAAGTCACTCATATCCGAATACTACTTCTCTTAACTTCCAGTCAACCCGACACGTGGTCGGAGGAGCCCGGATATTGCTGAGG	5.38281
GDB1_89to118_30snps_2	Randomly_Mutated_Window	ATATATACTAACCTCGTATATTACACACTGTACTTGAAGTCACTCATATCCGAATACTACTTCTCTTAACTTCCAGTCAACCCGACACTGCTTTAATAGTGCTCGGCGATGAACGCCG	NaN
GAL3_1to28_30snps_1	Randomly_Mutated_Window	AGTAATTTTGGGTTGACCCCAGGTATTTTTGACAACCCCAGGTATTCATACTTCCTATTAGCGGAATCAGGAGTGCAAAAAGAGAAAATAAAAGTAAAAAGGTAGGGCAACACATAGT	4.31923
GAL3_1to28_30snps_2	Randomly_Mutated_Window	ATCAATCAATCCGCATAGCCGCGAGGGGTTGACAACCCCAGGTATTCATACTTCCTATTAGCGGAATCAGGAGTGCAAAAAGAGAAAATAAAAGTAAAAAGGTAGGGCAACACATAGT	3.05562
GAL3_29to58_30snps_1	Randomly_Mutated_Window	CAAGTGAGGCAACACCTTTGTTACCACAAGCTATGTTGACACCTCGGCGCTCAGACGGTAGCGGAATCAGGAGTGCAAAAAGAGAAAATAAAAGTAAAAAGGTAGGGCAACACATAGT	1.91413
GAL3_29to58_30snps_2	Randomly_Mutated_Window	CAAGTGAGGCAACACCTTTGTTACCACACGCTTCGTGGTTATAGAATTCCGAGGACTATAGCGGAATCAGGAGTGCAAAAAGAGAAAATAAAAGTAAAAAGGTAGGGCAACACATAGT	4.43163
GAL3_59to88_30snps_1	Randomly_Mutated_Window	CAAGTGAGGCAACACCTTTGTTACCACATTGACAACCCCAGGTATTCATACTTCCTATAGTATACGCTGCACAGCTCTCTTTGAGTCCTAAAAGTAAAAAGGTAGGGCAACACATAGT	2.57807
GAL3_59to88_30snps_2	Randomly_Mutated_Window	CAAGTGAGGCAACACCTTTGTTACCACATTGACAACCCCAGGTATTCATACTTCCTATATATCCCCCGGACCTCTTTGGCCTTCTCGGTAAAAGTAAAAAGGTAGGGCAACACATAGT	3.60619
GAL3_89to118_30snps_1	Randomly_Mutated_Window	CAAGTGAGGCAACACCTTTGTTACCACATTGACAACCCCAGGTATTCATACTTCCTATTAGCGGAATCAGGAGTGCAAAAAGAGAAAAACTCTCGGGTCCATATATTGCGGGTTGGAG	4.38828
GAL3_89to118_30snps_2	Randomly_Mutated_Window	CAAGTGAGGCAACACCTTTGTTACCACATTGACAACCCCAGGTATTCATACTTCCTATTAGCGGAATCAGGAGTGCAAAAAGAGAAAACGTGTCATCGCTTTAGTCTGTGTCGGGCAG	4.53729
HMO1_1to28_30snps_1	Randomly_Mutated_Window	TGGAAAAAATCGCTTAAAGCTGCACTAAACCAATTAGTCCCAGCGGGCCCTCAGGGCTGGTCTACTGCCTTATACTCTAGGATGTACATCCTACCACACACAACAAGCCTGTCACACC	1.58666
HMO1_1to28_30snps_2	Randomly_Mutated_Window	GCACAGGGGTGGAGTTACCAATCCGTAGACCAATTAGTCCCAGCGGGCCCTCAGGGCTGGTCTACTGCCTTATACTCTAGGATGTACATCCTACCACACACAACAAGCCTGTCACACC	NaN
HMO1_29to58_30snps_1	Randomly_Mutated_Window	CTCTTCCTTCAAGAACTTAGCAAGAAGTCAGCGAGTTGAATTCATTCGAAGTGCATAAGGTCTACTGCCTTATACTCTAGGATGTACATCCTACCACACACAACAAGCCTGTCACACC	3.06061
HMO1_29to58_30snps_2	Randomly_Mutated_Window	CTCTTCCTTCAAGAACTTAGCAAGAAGTGGAGTCATACATTTCTATCAGACAGAATAAGGTCTACTGCCTTATACTCTAGGATGTACATCCTACCACACACAACAAGCCTGTCACACC	NaN
HMO1_59to88_30snps_1	Randomly_Mutated_Window	CTCTTCCTTCAAGAACTTAGCAAGAAGTACCAATTAGTCCCAGCGGGCCCTCAGGGCTACATCTGGAATGAGCCTGGCGCAGAACCTGTCCTACCACACACAACAAGCCTGTCACACC	1.26451
HMO1_59to88_30snps_2	Randomly_Mutated_Window	CTCTTCCTTCAAGAACTTAGCAAGAAGTACCAATTAGTCCCAGCGGGCCCTCAGGGCTCAAAAGAGAAACACCGGCAGGATGACACACTCCTACCACACACAACAAGCCTGTCACACC	1.16787
HMO1_89to118_30snps_1	Randomly_Mutated_Window	CTCTTCCTTCAAGAACTTAGCAAGAAGTACCAATTAGTCCCAGCGGGCCCTCAGGGCTGGTCTACTGCCTTATACTCTAGGATGTACAGAAGCTTCACAGAGCAGGTGACCGGGACGT	1.2673
HMO1_89to118_30snps_2	Randomly_Mutated_Window	CTCTTCCTTCAAGAACTTAGCAAGAAGTACCAATTAGTCCCAGCGGGCCCTCAGGGCTGGTCTACTGCCTTATACTCTAGGATGTACACAGGGTTTTCAGGCCGCTCTAACAGGATGA	NaN
YLR164W_1to28_30snps_1	Randomly_Mutated_Window	GATTAGGGCGCTGCAACCCGGCTGCATCTTTCAGTCCCCAGTGGACAGACCGTTTATCAGTTCTAATGAATCAGCAACGATTCTCAAAAAGGTTGCCCCAATTCTTAGGAAAGTAGGA	3.30407
YLR164W_1to28_30snps_2	Randomly_Mutated_Window	ACTTCCGATCGATGCTGTGTTGCCGGTCTTTCAGTCCCCAGTGGACAGACCGTTTATCAGTTCTAATGAATCAGCAACGATTCTCAAAAAGGTTGCCCCAATTCTTAGGAAAGTAGGA	1.68236
YLR164W_29to58_30snps_1	Randomly_Mutated_Window	CGAATTTCATAGAAGCAAACCTATATATCAATTCATAATGTAAACAGCCTGACGCTGTAGTTCTAATGAATCAGCAACGATTCTCAAAAAGGTTGCCCCAATTCTTAGGAAAGTAGGA	4.30803
YLR164W_29to58_30snps_2	Randomly_Mutated_Window	CGAATTTCATAGAAGCAAACCTATATATAACGCACTGAAGCCTTCGTTTTACAGACCGAGTTCTAATGAATCAGCAACGATTCTCAAAAAGGTTGCCCCAATTCTTAGGAAAGTAGGA	7.96785
YLR164W_59to88_30snps_1	Randomly_Mutated_Window	CGAATTTCATAGAAGCAAACCTATATATTTTCAGTCCCCAGTGGACAGACCGTTTATCTAGAACCTATCTGTTTATGTTGAGGGAGGTAAGGTTGCCCCAATTCTTAGGAAAGTAGGA	5.73554
YLR164W_59to88_30snps_2	Randomly_Mutated_Window	CGAATTTCATAGAAGCAAACCTATATATTTTCAGTCCCCAGTGGACAGACCGTTTATCGTCCTAGTGCCGCATTTGCGTTGCACACTTAAGGTTGCCCCAATTCTTAGGAAAGTAGGA	2.53387
YLR164W_89to118_30snps_1	Randomly_Mutated_Window	CGAATTTCATAGAAGCAAACCTATATATTTTCAGTCCCCAGTGGACAGACCGTTTATCAGTTCTAATGAATCAGCAACGATTCTCAAAGCCCCGCGTGATTAATGGGTAGCTCGCCCC	NaN
YLR164W_89to118_30snps_2	Randomly_Mutated_Window	CGAATTTCATAGAAGCAAACCTATATATTTTCAGTCCCCAGTGGACAGACCGTTTATCAGTTCTAATGAATCAGCAACGATTCTCAAACTCTCCAGTAGCGGGGACTCACGGAGTCTC	1.11575
CDC37_1to28_30snps_1	Randomly_Mutated_Window	ACACACCTTTTTAGTCAGCGTTAGAAAGCATAAGAGAACACCTCCGTTGCACCAACACTTCATCACGATAAAAAAACTATCGAGCTATCGTACTACGGAACAACTACATAAGTCAAAA	8.32177
CDC37_1to28_30snps_2	Randomly_Mutated_Window	GAGTTGCGGACCAGTACGCTCCCCTATTCATAAGAGAACACCTCCGTTGCACCAACACTTCATCACGATAAAAAAACTATCGAGCTATCGTACTACGGAACAACTACATAAGTCAAAA	NaN
CDC37_29to58_30snps_1	Randomly_Mutated_Window	TTTACTGAAGGATCATGAAAGATTGCCAACGTGCCCTCACGGGATTGCCTGATTCATATTCATCACGATAAAAAAACTATCGAGCTATCGTACTACGGAACAACTACATAAGTCAAAA	6.62467
CDC37_29to58_30snps_2	Randomly_Mutated_Window	TTTACTGAAGGATCATGAAAGATTGCCATTGCCTCTGGTCGTATATGATGCTAGTAGGTTCATCACGATAAAAAAACTATCGAGCTATCGTACTACGGAACAACTACATAAGTCAAAA	5.36599
CDC37_59to88_30snps_1	Randomly_Mutated_Window	TTTACTGAAGGATCATGAAAGATTGCCACATAAGAGAACACCTCCGTTGCACCAACACCAGCAATTATGGTTTTTTTACCGACTTAGACGTACTACGGAACAACTACATAAGTCAAAA	4.50518
CDC37_59to88_30snps_2	Randomly_Mutated_Window	TTTACTGAAGGATCATGAAAGATTGCCACATAAGAGAACACCTCCGTTGCACCAACACCCTGCATGAGAGGTGGCCAGGGTCGCGGCACGTACTACGGAACAACTACATAAGTCAAAA	2.15502
CDC37_89to118_30snps_1	Randomly_Mutated_Window	TTTACTGAAGGATCATGAAAGATTGCCACATAAGAGAACACCTCCGTTGCACCAACACTTCATCACGATAAAAAAACTATCGAGCTATACATAGTTCCTTGTTGACGTCTCTGGTTGC	7.74157
CDC37_89to118_30snps_2	Randomly_Mutated_Window	TTTACTGAAGGATCATGAAAGATTGCCACATAAGAGAACACCTCCGTTGCACCAACACTTCATCACGATAAAAAAACTATCGAGCTATACCGGGTTTTTCGCGTCGTTGTGAGTCGCC	4.11301
COG1_1to28_30snps_1	Randomly_Mutated_Window	AACCCGCAGCGGAGCATGATATTGATGCAAAAATGAAACATGGCGGTGAATAATAAATAACACATTCGTACAACAAATCTTGTGGTAGAAAACCTAAAAAAAACCAATACGATAGAAA	5.91514
COG1_1to28_30snps_2	Randomly_Mutated_Window	AAGTAGCGCAGCGCGGTCCCGCAGCTGCAAAAATGAAACATGGCGGTGAATAATAAATAACACATTCGTACAACAAATCTTGTGGTAGAAAACCTAAAAAAAACCAATACGATAGAAA	5.29402
COG1_29to58_30snps_1	Randomly_Mutated_Window	TCTGTTACAGTTCATCATTATGCTGAAGCCTCCGTTTCATGCTTACGCTGGGTACTGGAACACATTCGTACAACAAATCTTGTGGTAGAAAACCTAAAAAAAACCAATACGATAGAAA	3.75319
COG1_29to58_30snps_2	Randomly_Mutated_Window	TCTGTTACAGTTCATCATTATGCTGAAGGGGCTGCGGGTTCATACAGCTCCGCAGTCAAACACATTCGTACAACAAATCTTGTGGTAGAAAACCTAAAAAAAACCAATACGATAGAAA	2.95438
COG1_59to88_30snps_1	Randomly_Mutated_Window	TCTGTTACAGTTCATCATTATGCTGAAGAAAAATGAAACATGGCGGTGAATAATAAATTGTTAGCCTCATTTTATGGAAGAACTCCGTAAAACCTAAAAAAAACCAATACGATAGAAA	4.41007
COG1_59to88_30snps_2	Randomly_Mutated_Window	TCTGTTACAGTTCATCATTATGCTGAAGAAAAATGAAACATGGCGGTGAATAATAAATCTTGGGGAAACTAGTTGTTCGAGAACCCTCAAAACCTAAAAAAAACCAATACGATAGAAA	4.91371
COG1_89to118_30snps_1	Randomly_Mutated_Window	TCTGTTACAGTTCATCATTATGCTGAAGAAAAATGAAACATGGCGGTGAATAATAAATAACACATTCGTACAACAAATCTTGTGGTAGTGCGAGGCGCTTGGTTGTCGGGCGCTTCCC	NaN
COG1_89to118_30snps_2	Randomly_Mutated_Window	TCTGTTACAGTTCATCATTATGCTGAAGAAAAATGAAACATGGCGGTGAATAATAAATAACACATTCGTACAACAAATCTTGTGGTAGGGTGTACCTTCGTTGGGGGAGAAGGTCGTT	2.02064
SEC9_1to28_30snps_1	Randomly_Mutated_Window	TTCGCGCCGACATCCCGCGCCCTGACCCCTCCGGTGTATAAATAAATAAAGTACATTCTTGGTACTCCTGAACCTAGCCTGGAGTAACTCGGAATAATACACCATTGACACCAAAAGA	NaN
SEC9_1to28_30snps_2	Randomly_Mutated_Window	ACTCAGCAGACACGTCGGGGCCCTTCACCTCCGGTGTATAAATAAATAAAGTACATTCTTGGTACTCCTGAACCTAGCCTGGAGTAACTCGGAATAATACACCATTGACACCAAAAGA	6.36966
SEC9_29to58_30snps_1	Randomly_Mutated_Window	CGAATCGTTTGCGTAATTATATGACTTGACAAAAGTCTGTGGCCGCCGCGAATACAATTTGGTACTCCTGAACCTAGCCTGGAGTAACTCGGAATAATACACCATTGACACCAAAAGA	2.65394
SEC9_29to58_30snps_2	Randomly_Mutated_Window	CGAATCGTTTGCGTAATTATATGACTTGGCTTAACTGGCCGTGTCCACGTACCACCAATTGGTACTCCTGAACCTAGCCTGGAGTAACTCGGAATAATACACCATTGACACCAAAAGA	2.07682
SEC9_59to88_30snps_1	Randomly_Mutated_Window	CGAATCGTTTGCGTAATTATATGACTTGCTCCGGTGTATAAATAAATAAAGTACATTCACTAGGAGAGGTGCAAATCTAGTTTAATTGTCGGAATAATACACCATTGACACCAAAAGA	7.56226
SEC9_59to88_30snps_2	Randomly_Mutated_Window	CGAATCGTTTGCGTAATTATATGACTTGCTCCGGTGTATAAATAAATAAAGTACATTCACATGTTGTAACGGATGCCTAGACTTGCCATCGGAATAATACACCATTGACACCAAAAGA	4.59436
SEC9_89to118_30snps_1	Randomly_Mutated_Window	CGAATCGTTTGCGTAATTATATGACTTGCTCCGGTGTATAAATAAATAAAGTACATTCTTGGTACTCCTGAACCTAGCCTGGAGTAACCTAACGCGCAGTGAACGGCGAGGGGTCCCT	3.76582
SEC9_89to118_30snps_2	Randomly_Mutated_Window	CGAATCGTTTGCGTAATTATATGACTTGCTCCGGTGTATAAATAAATAAAGTACATTCTTGGTACTCCTGAACCTAGCCTGGAGTAACGGCAGGGGCATTGAAGGACCTCGATCGGTC	2.74626
RPC31_1to28_30snps_1	Randomly_Mutated_Window	CGGCCCTTGTTCCGGGATTGTCGTCGCGTAGTTTCCTCATCGCAGCAACCTATAGAAAACAACACGACAGAAAGATATTGTAACTTGATAGTACCGAGCATATATACCCCGAACAAAC	5.89204
RPC31_1to28_30snps_2	Randomly_Mutated_Window	CTGACCATGCTTTCAGTCTTTTCATGGCTAGTTTCCTCATCGCAGCAACCTATAGAAAACAACACGACAGAAAGATATTGTAACTTGATAGTACCGAGCATATATACCCCGAACAAAC	NaN
RPC31_29to58_30snps_1	Randomly_Mutated_Window	AAATTTGAAAAAATCTCAAAGAAGAAAAGTCACCGACTCATAATAAGGGGGCGGCCCTACAACACGACAGAAAGATATTGTAACTTGATAGTACCGAGCATATATACCCCGAACAAAC	4.62582
RPC31_29to58_30snps_2	Randomly_Mutated_Window	AAATTTGAAAAAATCTCAAAGAAGAAAAGGAAAATAATGGAAAGAGCCAGATGTCTTTACAACACGACAGAAAGATATTGTAACTTGATAGTACCGAGCATATATACCCCGAACAAAC	4.80095
RPC31_59to88_30snps_1	Randomly_Mutated_Window	AAATTTGAAAAAATCTCAAAGAAGAAAATAGTTTCCTCATCGCAGCAACCTATAGAAAGGTTAGTCTGTACCGTCGTAATCGCGAACCTAGTACCGAGCATATATACCCCGAACAAAC	6.92697
RPC31_59to88_30snps_2	Randomly_Mutated_Window	AAATTTGAAAAAATCTCAAAGAAGAAAATAGTTTCCTCATCGCAGCAACCTATAGAAACAGTATATCGCTCCGTCGCAATATGTCAAGTAGTACCGAGCATATATACCCCGAACAAAC	2.43323
RPC31_89to118_30snps_1	Randomly_Mutated_Window	AAATTTGAAAAAATCTCAAAGAAGAAAATAGTTTCCTCATCGCAGCAACCTATAGAAAACAACACGACAGAAAGATATTGTAACTTGAATCCCTATCCTCGGCCACGTGTCCTGCCTA	6.19895
RPC31_89to118_30snps_2	Randomly_Mutated_Window	AAATTTGAAAAAATCTCAAAGAAGAAAATAGTTTCCTCATCGCAGCAACCTATAGAAAACAACACGACAGAAAGATATTGTAACTTGACCACCATAGTATGGGTCTTGTGCCCTTCTG	NaN
SOL2_1to28_30snps_1	Randomly_Mutated_Window	TTCCACTACCTTTTCCTGTCAAACAAGGTAACAAATTTCAATGATAATAGTGGCATCATCATCGTCATATCCAGTGTAGGTATGGACTAGAACAGAAAGCAATTTGCAGCAAGACAAT	NaN
SOL2_1to28_30snps_2	Randomly_Mutated_Window	TTAGCTTGACTAAGCGAGATAAGAGATTTAACAAATTTCAATGATAATAGTGGCATCATCATCGTCATATCCAGTGTAGGTATGGACTAGAACAGAAAGCAATTTGCAGCAAGACAAT	4.14561
SOL2_29to58_30snps_1	Randomly_Mutated_Window	AATAGGGCGGGCGCTACAGGGGTTTTCCGCTAGCGCCCAGCGTCGCCGTCGCAGTCATTCATCGTCATATCCAGTGTAGGTATGGACTAGAACAGAAAGCAATTTGCAGCAAGACAAT	NaN
SOL2_29to58_30snps_2	Randomly_Mutated_Window	AATAGGGCGGGCGCTACAGGGGTTTTCCCCCGTCGGGGGCGATTATGACTATTAGAGCTCATCGTCATATCCAGTGTAGGTATGGACTAGAACAGAAAGCAATTTGCAGCAAGACAAT	3.18342
SOL2_59to88_30snps_1	Randomly_Mutated_Window	AATAGGGCGGGCGCTACAGGGGTTTTCCTAACAAATTTCAATGATAATAGTGGCATCAAGCATTAAGCGCGACTATACCCAGCCCGTCAGAACAGAAAGCAATTTGCAGCAAGACAAT	4.63856
SOL2_59to88_30snps_2	Randomly_Mutated_Window	AATAGGGCGGGCGCTACAGGGGTTTTCCTAACAAATTTCAATGATAATAGTGGCATCAGACAGCCACAGGGGGACAGTACCCGCCTTAAGAACAGAAAGCAATTTGCAGCAAGACAAT	3.0703
SOL2_89to118_30snps_1	Randomly_Mutated_Window	AATAGGGCGGGCGCTACAGGGGTTTTCCTAACAAATTTCAATGATAATAGTGGCATCATCATCGTCATATCCAGTGTAGGTATGGACTGTCCTGATGTTATGCAGAGCAGTTCTTTCA	NaN
SOL2_89to118_30snps_2	Randomly_Mutated_Window	AATAGGGCGGGCGCTACAGGGGTTTTCCTAACAAATTTCAATGATAATAGTGGCATCATCATCGTCATATCCAGTGTAGGTATGGACTTTGGGGAGCTCTTTACGTACTTCCACTTTG	1.19759
GLO2_1to28_30snps_1	Randomly_Mutated_Window	TGTTGTCCCTCGGGTGATAACCGTGCTATTTAGTATTCTTAGATAAGTTGCTAGATTTACCAATATCAAAGGGAAGACTGCAGGACAACACAAAAACACAAGAAAAGGAGGACAAAAA	NaN
GLO2_1to28_30snps_2	Randomly_Mutated_Window	CTTATTGAGCCTCTGAGGCGCCCTTCTATTTAGTATTCTTAGATAAGTTGCTAGATTTACCAATATCAAAGGGAAGACTGCAGGACAACACAAAAACACAAGAAAAGGAGGACAAAAA	5.69962
GLO2_29to58_30snps_1	Randomly_Mutated_Window	AAACCCATTATATCCCTCTTAGAAAAATGAGCCGCCGTCCGCGCCGAAATGGCACCAAACCAATATCAAAGGGAAGACTGCAGGACAACACAAAAACACAAGAAAAGGAGGACAAAAA	NaN
GLO2_29to58_30snps_2	Randomly_Mutated_Window	AAACCCATTATATCCCTCTTAGAAAAATCGGGAACGAAGCGTTCGTAGACAATTGCGCACCAATATCAAAGGGAAGACTGCAGGACAACACAAAAACACAAGAAAAGGAGGACAAAAA	4.44045
GLO2_59to88_30snps_1	Randomly_Mutated_Window	AAACCCATTATATCCCTCTTAGAAAAATTTTAGTATTCTTAGATAAGTTGCTAGATTTGTTCGGCAATGGAAATTCGTGTGTCCCGGGCACAAAAACACAAGAAAAGGAGGACAAAAA	4.68553
GLO2_59to88_30snps_2	Randomly_Mutated_Window	AAACCCATTATATCCCTCTTAGAAAAATTTTAGTATTCTTAGATAAGTTGCTAGATTTGTTCGGTCATTTACTCTTTGCTACAATATTCACAAAAACACAAGAAAAGGAGGACAAAAA	9.15793
GLO2_89to118_30snps_1	Randomly_Mutated_Window	AAACCCATTATATCCCTCTTAGAAAAATTTTAGTATTCTTAGATAAGTTGCTAGATTTACCAATATCAAAGGGAAGACTGCAGGACAATTTCTGCCAGTTGACGGTCTCTCTGCCTCT	4.84148
GLO2_89to118_30snps_2	Randomly_Mutated_Window	AAACCCATTATATCCCTCTTAGAAAAATTTTAGTATTCTTAGATAAGTTGCTAGATTTACCAATATCAAAGGGAAGACTGCAGGACAATGGCCTCTACTCTTCCGGCAGCATGCCCTT	NaN
ATP3_1to28_30snps_1	Randomly_Mutated_Window	GGAAGCAGCGCACTTTCACGGGCGTCGTAATAAGAAACTATTGAGACTGAACCGTTTTGGTTAATTTCAGGTGGAAACAATTGAAGACGAGCAGTAAACATTATTTTATTTAGTAGTC	4.19721
ATP3_1to28_30snps_2	Randomly_Mutated_Window	CGGCTGACGTTTGTCTGACTCCTCATTTAATAAGAAACTATTGAGACTGAACCGTTTTGGTTAATTTCAGGTGGAAACAATTGAAGACGAGCAGTAAACATTATTTTATTTAGTAGTC	5.04774
ATP3_29to58_30snps_1	Randomly_Mutated_Window	AATGATTATCACTCAGTTAAAAAAGACATCATTAGCGTCCACTGAGTAATGAAAGCGCGGTTAATTTCAGGTGGAAACAATTGAAGACGAGCAGTAAACATTATTTTATTTAGTAGTC	4.35372
ATP3_29to58_30snps_2	Randomly_Mutated_Window	AATGATTATCACTCAGTTAAAAAAGACACGGTTCTCCTGGCCTTACGCCTGAGCGCCCGGTTAATTTCAGGTGGAAACAATTGAAGACGAGCAGTAAACATTATTTTATTTAGTAGTC	4.62675
ATP3_59to88_30snps_1	Randomly_Mutated_Window	AATGATTATCACTCAGTTAAAAAAGACAAATAAGAAACTATTGAGACTGAACCGTTTTCTGATGCACGTCCAATGGGTGCAACTCAGTGAGCAGTAAACATTATTTTATTTAGTAGTC	3.41144
ATP3_59to88_30snps_2	Randomly_Mutated_Window	AATGATTATCACTCAGTTAAAAAAGACAAATAAGAAACTATTGAGACTGAACCGTTTTTAGGGGGAGTTTTCACTCGGTTACCTGATTGAGCAGTAAACATTATTTTATTTAGTAGTC	5.67981
ATP3_89to118_30snps_1	Randomly_Mutated_Window	AATGATTATCACTCAGTTAAAAAAGACAAATAAGAAACTATTGAGACTGAACCGTTTTGGTTAATTTCAGGTGGAAACAATTGAAGACCCTGCCATTGGCACGAGAGGCAAGAAGCAG	7.07573
ATP3_89to118_30snps_2	Randomly_Mutated_Window	AATGATTATCACTCAGTTAAAAAAGACAAATAAGAAACTATTGAGACTGAACCGTTTTGGTTAATTTCAGGTGGAAACAATTGAAGACACATTAGTTGGCGATCGCATCCCTAGTCAG	7.86697
BIM1_1to28_30snps_1	Randomly_Mutated_Window	CATGAAATCACCCGATTACAAGGGCCACCGAAGAAAACAAACACTTGAAACAAGTCAAAAAAAATTGAAGGCAGACTCAAAAGCAAGGATAATATTCCACCAAATCAGGGACGAAGCA	3.3693
BIM1_1to28_30snps_2	Randomly_Mutated_Window	TTAGAGATCAGGCGGCTGGTGCTTCACACGAAGAAAACAAACACTTGAAACAAGTCAAAAAAAATTGAAGGCAGACTCAAAAGCAAGGATAATATTCCACCAAATCAGGGACGAAGCA	NaN
BIM1_29to58_30snps_1	Randomly_Mutated_Window	GCGTTTGAAGAAGTTAGTAGCAAAATGGGACCCGCGGGCCCAGTGCTGGCTTTTCTTCAAAAAATTGAAGGCAGACTCAAAAGCAAGGATAATATTCCACCAAATCAGGGACGAAGCA	3.06996
BIM1_29to58_30snps_2	Randomly_Mutated_Window	GCGTTTGAAGAAGTTAGTAGCAAAATGGATGGAGTCCGCTGAGTGGTGGGTCTCGGGCAAAAAATTGAAGGCAGACTCAAAAGCAAGGATAATATTCCACCAAATCAGGGACGAAGCA	NaN
BIM1_59to88_30snps_1	Randomly_Mutated_Window	GCGTTTGAAGAAGTTAGTAGCAAAATGGCGAAGAAAACAAACACTTGAAACAAGTCAAGGGTTTCCTGCCCTTAGGCTCGCTTATTAAATAATATTCCACCAAATCAGGGACGAAGCA	NaN
BIM1_59to88_30snps_2	Randomly_Mutated_Window	GCGTTTGAAGAAGTTAGTAGCAAAATGGCGAAGAAAACAAACACTTGAAACAAGTCAACGGGGTGAAGCCAGGATTCACTGCCACTCCATAATATTCCACCAAATCAGGGACGAAGCA	NaN
BIM1_89to118_30snps_1	Randomly_Mutated_Window	GCGTTTGAAGAAGTTAGTAGCAAAATGGCGAAGAAAACAAACACTTGAAACAAGTCAAAAAAAATTGAAGGCAGACTCAAAAGCAAGGTACTGTAAATCGTTGTAACCACTGTGGTGC	5.68646
BIM1_89to118_30snps_2	Randomly_Mutated_Window	GCGTTTGAAGAAGTTAGTAGCAAAATGGCGAAGAAAACAAACACTTGAAACAAGTCAAAAAAAATTGAAGGCAGACTCAAAAGCAAGGGGGCCCGGTATGGTTTGGGCTTGAACTTAT	NaN
PCC1_1to28_30snps_1	Randomly_Mutated_Window	TGGGTACTGTGTGTTTCTTGTCGAAGGCGTCCTTTAAGTTAAAATAATATGAATGGTGGAAGAACCCAGATCAACTTGACTGAAACAAGTCTGCCAACATAGACAGCTAAGAAAATTG	4.97611
PCC1_1to28_30snps_2	Randomly_Mutated_Window	AGGACAACTCCTGTATATTTGGTAAAGCGTCCTTTAAGTTAAAATAATATGAATGGTGGAAGAACCCAGATCAACTTGACTGAAACAAGTCTGCCAACATAGACAGCTAAGAAAATTG	6.64185
PCC1_29to58_30snps_1	Randomly_Mutated_Window	CTTCGCGAAAACTCCAGCGACACCGCTGCGTTAAGTTTGGCGGCAGCACGTCGACAAAGAAGAACCCAGATCAACTTGACTGAAACAAGTCTGCCAACATAGACAGCTAAGAAAATTG	4.20425
PCC1_29to58_30snps_2	Randomly_Mutated_Window	CTTCGCGAAAACTCCAGCGACACCGCTGAATTACGCTTGCCCCCCCCCTATCGAACGCGAAGAACCCAGATCAACTTGACTGAAACAAGTCTGCCAACATAGACAGCTAAGAAAATTG	1.49934
PCC1_59to88_30snps_1	Randomly_Mutated_Window	CTTCGCGAAAACTCCAGCGACACCGCTGGTCCTTTAAGTTAAAATAATATGAATGGTGCGTTCTTGTGTCCAGTTACACGGATGGTTGGTCTGCCAACATAGACAGCTAAGAAAATTG	4.42661
PCC1_59to88_30snps_2	Randomly_Mutated_Window	CTTCGCGAAAACTCCAGCGACACCGCTGGTCCTTTAAGTTAAAATAATATGAATGGTGTGTCCGAAAGCCCTTTGCATTTCTGTTTGCGTCTGCCAACATAGACAGCTAAGAAAATTG	4.24249
PCC1_89to118_30snps_1	Randomly_Mutated_Window	CTTCGCGAAAACTCCAGCGACACCGCTGGTCCTTTAAGTTAAAATAATATGAATGGTGGAAGAACCCAGATCAACTTGACTGAAACAACGACATGCGTGCCCTGGTGGGGATCGTCCA	NaN
PCC1_89to118_30snps_2	Randomly_Mutated_Window	CTTCGCGAAAACTCCAGCGACACCGCTGGTCCTTTAAGTTAAAATAATATGAATGGTGGAAGAACCCAGATCAACTTGACTGAAACAATGGAAGATTTGCTCCGGTTGGCACTTTCCT	1.75666
YRM1_1to28_30snps_1	Randomly_Mutated_Window	GACATCAAGCATCTCGCTCTGTGGATGGAATGCCAGGTGGTATTGTAATAATAACGGCAAGAGTATAGAAAGTCAGAGGGGAAAGCACATTGAATGGTCCTGGTAAAGGGAGTTGTTA	NaN
YRM1_1to28_30snps_2	Randomly_Mutated_Window	GGTGCTGACTTTCCCGCTCCTGGATCGGAATGCCAGGTGGTATTGTAATAATAACGGCAAGAGTATAGAAAGTCAGAGGGGAAAGCACATTGAATGGTCCTGGTAAAGGGAGTTGTTA	NaN
YRM1_29to58_30snps_1	Randomly_Mutated_Window	CCATGGTTTACAAGGCGATAAAATGACACGAATTGCCGCTATACAATTCCTATTACTAAAGAGTATAGAAAGTCAGAGGGGAAAGCACATTGAATGGTCCTGGTAAAGGGAGTTGTTA	NaN
YRM1_29to58_30snps_2	Randomly_Mutated_Window	CCATGGTTTACAAGGCGATAAAATGACACGGTAGTTCATCGTGGTCCTCTTCCGTACGAAGAGTATAGAAAGTCAGAGGGGAAAGCACATTGAATGGTCCTGGTAAAGGGAGTTGTTA	NaN
YRM1_59to88_30snps_1	Randomly_Mutated_Window	CCATGGTTTACAAGGCGATAAAATGACAAATGCCAGGTGGTATTGTAATAATAACGGCGGACTATCTCGTGCCACCCAACCTTCATGTATTGAATGGTCCTGGTAAAGGGAGTTGTTA	NaN
YRM1_59to88_30snps_2	Randomly_Mutated_Window	CCATGGTTTACAAGGCGATAAAATGACAAATGCCAGGTGGTATTGTAATAATAACGGCCCCGAACACAGGGCAGTCCTATAGGCAACGATTGAATGGTCCTGGTAAAGGGAGTTGTTA	NaN
YRM1_89to118_30snps_1	Randomly_Mutated_Window	CCATGGTTTACAAGGCGATAAAATGACAAATGCCAGGTGGTATTGTAATAATAACGGCAAGAGTATAGAAAGTCAGAGGGGAAAGCACTCCTTCCCCCAGAATATCCCTATCGCCGGG	1.59574
YRM1_89to118_30snps_2	Randomly_Mutated_Window	CCATGGTTTACAAGGCGATAAAATGACAAATGCCAGGTGGTATTGTAATAATAACGGCAAGAGTATAGAAAGTCAGAGGGGAAAGCACCCACTGGACGTTCCCAGGTACCCAGGCGAT	3.3693
SRB6_1to28_30snps_1	Randomly_Mutated_Window	GACTCTGGTCTACTGTCCGCGGGCACACTACCTATCACTTAGTAGCATGCATAAGCCATGGGCTAATCATAACAGATTGTGATGATAGGCATCCTGTACTCCTTTTTTTTACAAGAAA	1.16402
SRB6_1to28_30snps_2	Randomly_Mutated_Window	TAACCCGCAAGGCTGTTGGAGCGTGGGATACCTATCACTTAGTAGCATGCATAAGCCATGGGCTAATCATAACAGATTGTGATGATAGGCATCCTGTACTCCTTTTTTTTACAAGAAA	1.2673
SRB6_29to58_30snps_1	Randomly_Mutated_Window	AGGAAATTGTACTGCCATTTAACGCATTACAGACCATTGACCGTAGCCTGGCTGAGGGTGGGCTAATCATAACAGATTGTGATGATAGGCATCCTGTACTCCTTTTTTTTACAAGAAA	0.367104
SRB6_29to58_30snps_2	Randomly_Mutated_Window	AGGAAATTGTACTGCCATTTAACGCATTACATGGGAGTGCTCCTTTTCAATGGCTAGCTGGGCTAATCATAACAGATTGTGATGATAGGCATCCTGTACTCCTTTTTTTTACAAGAAA	2.52007
SRB6_59to88_30snps_1	Randomly_Mutated_Window	AGGAAATTGTACTGCCATTTAACGCATTTACCTATCACTTAGTAGCATGCATAAGCCAGTTATGCCAGGGCGTGTGCACCTTGTGACAGCATCCTGTACTCCTTTTTTTTACAAGAAA	NaN
SRB6_59to88_30snps_2	Randomly_Mutated_Window	AGGAAATTGTACTGCCATTTAACGCATTTACCTATCACTTAGTAGCATGCATAAGCCAGCCATAGCCAGCCGGTTTCGACTGCTGCGCGCATCCTGTACTCCTTTTTTTTACAAGAAA	1.13783
SRB6_89to118_30snps_1	Randomly_Mutated_Window	AGGAAATTGTACTGCCATTTAACGCATTTACCTATCACTTAGTAGCATGCATAAGCCATGGGCTAATCATAACAGATTGTGATGATAGCACAGGATGGGAGGAGGCCCCGCTTTTGTC	NaN
SRB6_89to118_30snps_2	Randomly_Mutated_Window	AGGAAATTGTACTGCCATTTAACGCATTTACCTATCACTTAGTAGCATGCATAAGCCATGGGCTAATCATAACAGATTGTGATGATAGATTCGAACGCAGGGGGAGCCACCTCCTTGT	0.758414
SPT3_1to28_30snps_1	Randomly_Mutated_Window	ACGTTGATGCTCCACCGCTCTTCCGCGGGAAAAGTAAAAAGTAAGGTTGAAGACACTCTGAACCCGGGGAAGAGTGCATACAAGGTACCGTGCCAAAATTCAAGAGATTAGGGCAGGA	4.37289
SPT3_1to28_30snps_2	Randomly_Mutated_Window	CCGAGTGAAGTACCTTCGTTAACCGGTAGAAAAGTAAAAAGTAAGGTTGAAGACACTCTGAACCCGGGGAAGAGTGCATACAAGGTACCGTGCCAAAATTCAAGAGATTAGGGCAGGA	5.35948
SPT3_29to58_30snps_1	Randomly_Mutated_Window	GAACCATGTAATATAGATCGGCGGAAACCTGGGTACCCCTCCCGATCCAGGAGGTGCATGAACCCGGGGAAGAGTGCATACAAGGTACCGTGCCAAAATTCAAGAGATTAGGGCAGGA	2.09643
SPT3_29to58_30snps_2	Randomly_Mutated_Window	GAACCATGTAATATAGATCGGCGGAAACTGTCGCGGGTGGCATCACCGCTTATGTTCTTGAACCCGGGGAAGAGTGCATACAAGGTACCGTGCCAAAATTCAAGAGATTAGGGCAGGA	3.60264
SPT3_59to88_30snps_1	Randomly_Mutated_Window	GAACCATGTAATATAGATCGGCGGAAACGAAAAGTAAAAAGTAAGGTTGAAGACACTCCAGCGTTTTCTCGTTCGCACCTAGGTTCTGCGTGCCAAAATTCAAGAGATTAGGGCAGGA	5.33952
SPT3_59to88_30snps_2	Randomly_Mutated_Window	GAACCATGTAATATAGATCGGCGGAAACGAAAAGTAAAAAGTAAGGTTGAAGACACTCCATGTAGCCCACGCCCAAATCTAGCACCGACGTGCCAAAATTCAAGAGATTAGGGCAGGA	NaN
SPT3_89to118_30snps_1	Randomly_Mutated_Window	GAACCATGTAATATAGATCGGCGGAAACGAAAAGTAAAAAGTAAGGTTGAAGACACTCTGAACCCGGGGAAGAGTGCATACAAGGTACTACATTTTCTACGGCCTCTGCCTCAGTAAT	5.55719
SPT3_89to118_30snps_2	Randomly_Mutated_Window	GAACCATGTAATATAGATCGGCGGAAACGAAAAGTAAAAAGTAAGGTTGAAGACACTCTGAACCCGGGGAAGAGTGCATACAAGGTACGAGTGGTGCTACTCGTGTTAGTTCTACCAT	3.60554
SOL3_1to28_30snps_1	Randomly_Mutated_Window	CCGAGAAGAAAAACCTGGAATTTAGCCCGTAATAGTGGTATATTATATAAAGAGGAAAGGCCTCGAGGATAATAGAAGGCAATGCACCATCAATTGCTTTACCCCTGGTCCGCGACAA	4.74372
SOL3_1to28_30snps_2	Randomly_Mutated_Window	GCGCTAGCATCCGGATGTAAGTGGCCAAGTAATAGTGGTATATTATATAAAGAGGAAAGGCCTCGAGGATAATAGAAGGCAATGCACCATCAATTGCTTTACCCCTGGTCCGCGACAA	5.21293
SOL3_29to58_30snps_1	Randomly_Mutated_Window	TTTTCTTACCTTTTTATCCCCGACAATGAACTCCTCTACTCGACGACCGCTTCTACTCGGCCTCGAGGATAATAGAAGGCAATGCACCATCAATTGCTTTACCCCTGGTCCGCGACAA	2.12513
SOL3_29to58_30snps_2	Randomly_Mutated_Window	TTTTCTTACCTTTTTATCCCCGACAATGTGCTGCTACTGTCCCGCCGCGGGACCCTCCGGCCTCGAGGATAATAGAAGGCAATGCACCATCAATTGCTTTACCCCTGGTCCGCGACAA	1.20942
SOL3_59to88_30snps_1	Randomly_Mutated_Window	TTTTCTTACCTTTTTATCCCCGACAATGGTAATAGTGGTATATTATATAAAGAGGAAATAATGAAGTCTGTTACTGGCAGTTAAATAGATCAATTGCTTTACCCCTGGTCCGCGACAA	7.32265
SOL3_59to88_30snps_2	Randomly_Mutated_Window	TTTTCTTACCTTTTTATCCCCGACAATGGTAATAGTGGTATATTATATAAAGAGGAAACCTAAGTCATTCTCGTTCGTCTCGGTGCTGATCAATTGCTTTACCCCTGGTCCGCGACAA	7.94964
SOL3_89to118_30snps_1	Randomly_Mutated_Window	TTTTCTTACCTTTTTATCCCCGACAATGGTAATAGTGGTATATTATATAAAGAGGAAAGGCCTCGAGGATAATAGAAGGCAATGCACCCAGGCACAGCAGTAGATCTTATAAATGGTG	NaN
SOL3_89to118_30snps_2	Randomly_Mutated_Window	TTTTCTTACCTTTTTATCCCCGACAATGGTAATAGTGGTATATTATATAAAGAGGAAAGGCCTCGAGGATAATAGAAGGCAATGCACCCGAGGGGCGAGACAAATCTAAATATTGGCG	4.60742
PSF1_1to28_30snps_1	Randomly_Mutated_Window	TAGTTTCGAGCATCAAAACGCTGGTGTAGAAAATTGTAATTTAAAATAACTAACGAAGAAAGCTGAAAAATAGATGTGAGGGAAAATCGTTTATAAACGGCCATGCTCACAGAGAATC	NaN
PSF1_1to28_30snps_2	Randomly_Mutated_Window	TGAATGGTAGGGGCACCTAGAGGTCACAGAAAATTGTAATTTAAAATAACTAACGAAGAAAGCTGAAAAATAGATGTGAGGGAAAATCGTTTATAAACGGCCATGCTCACAGAGAATC	NaN
PSF1_29to58_30snps_1	Randomly_Mutated_Window	GCTCAAAACCTTCTTGTCGTTACAACGCCCTCTGCACTGCCAGTGGCCTGAGTTTGTTAAAGCTGAAAAATAGATGTGAGGGAAAATCGTTTATAAACGGCCATGCTCACAGAGAATC	NaN
PSF1_29to58_30snps_2	Randomly_Mutated_Window	GCTCAAAACCTTCTTGTCGTTACAACGCCGTGCGATGTGCGCCTCGGTCGCTCTCGCAAAAGCTGAAAAATAGATGTGAGGGAAAATCGTTTATAAACGGCCATGCTCACAGAGAATC	NaN
PSF1_59to88_30snps_1	Randomly_Mutated_Window	GCTCAAAACCTTCTTGTCGTTACAACGCGAAAATTGTAATTTAAAATAACTAACGAAGGTTATCATTGCGATATCTCCGAACTGTTGGGTTTATAAACGGCCATGCTCACAGAGAATC	NaN
PSF1_59to88_30snps_2	Randomly_Mutated_Window	GCTCAAAACCTTCTTGTCGTTACAACGCGAAAATTGTAATTTAAAATAACTAACGAAGTTCAGCTGTTTCAGACCAGAGTTTGCCGCAGTTTATAAACGGCCATGCTCACAGAGAATC	NaN
PSF1_89to118_30snps_1	Randomly_Mutated_Window	GCTCAAAACCTTCTTGTCGTTACAACGCGAAAATTGTAATTTAAAATAACTAACGAAGAAAGCTGAAAAATAGATGTGAGGGAAAATCCGAAGCGGGAATTTGGTGCAGGCTCTCCGT	2.61326
PSF1_89to118_30snps_2	Randomly_Mutated_Window	GCTCAAAACCTTCTTGTCGTTACAACGCGAAAATTGTAATTTAAAATAACTAACGAAGAAAGCTGAAAAATAGATGTGAGGGAAAATCAGACCGCCCACAGTCACGCGTTGTCAGCAT	3.06658
RUB1_1to28_30snps_1	Randomly_Mutated_Window	CAAATAGGATTGGGACCGTTCTGGAACCCTGAAAAACCAAAATTCTGTTATTCAAATGAAGTATTCCGACAGAGGAATAAATAAAGGAAGGTAATTAACTTCCTTACAGCCGTAACCG	4.33483
RUB1_1to28_30snps_2	Randomly_Mutated_Window	ACTTCCTCCTAGTTTCGCGCTTAGCGTACTGAAAAACCAAAATTCTGTTATTCAAATGAAGTATTCCGACAGAGGAATAAATAAAGGAAGGTAATTAACTTCCTTACAGCCGTAACCG	4.65631
RUB1_29to58_30snps_1	Randomly_Mutated_Window	TTCGGGAAGGCAAACGAACAACTTTTAGAATCTTTCAGCGCTAAGGTCACCAGCTCCAAAGTATTCCGACAGAGGAATAAATAAAGGAAGGTAATTAACTTCCTTACAGCCGTAACCG	4.46001
RUB1_29to58_30snps_2	Randomly_Mutated_Window	TTCGGGAAGGCAAACGAACAACTTTTAGGGATGTGGAGTTGGAATGTGCGAGTCGGCAAAGTATTCCGACAGAGGAATAAATAAAGGAAGGTAATTAACTTCCTTACAGCCGTAACCG	3.25669
RUB1_59to88_30snps_1	Randomly_Mutated_Window	TTCGGGAAGGCAAACGAACAACTTTTAGCTGAAAAACCAAAATTCTGTTATTCAAATGGCCATGCAGAGGTAGACTGCGTGGCGGCTGAGGTAATTAACTTCCTTACAGCCGTAACCG	2.92136
RUB1_59to88_30snps_2	Randomly_Mutated_Window	TTCGGGAAGGCAAACGAACAACTTTTAGCTGAAAAACCAAAATTCTGTTATTCAAATGTCCCGACAATCGGCGCTCTCTCCATGCTACAGGTAATTAACTTCCTTACAGCCGTAACCG	4.00828
RUB1_89to118_30snps_1	Randomly_Mutated_Window	TTCGGGAAGGCAAACGAACAACTTTTAGCTGAAAAACCAAAATTCTGTTATTCAAATGAAGTATTCCGACAGAGGAATAAATAAAGGACAAGGGGGGTAAGTTCATTTAGATCCTTAA	4.42913
RUB1_89to118_30snps_2	Randomly_Mutated_Window	TTCGGGAAGGCAAACGAACAACTTTTAGCTGAAAAACCAAAATTCTGTTATTCAAATGAAGTATTCCGACAGAGGAATAAATAAAGGACCCCGGCGCTACCATCAGTTTTTTAGGTAT	3.92923
DLD2_1to28_30snps_1	Randomly_Mutated_Window	AGGTATGCGCTAGTGCGGGGTGTGGGGAGACTCTGAAAAAGTGGTAATAAATGCATTGACAACTTCTTCTCTTTATTTTACAGACATTAATCCAGCACTACAAGTGGCATATAACAAG	6.11691
DLD2_1to28_30snps_2	Randomly_Mutated_Window	CTTCCCCGGGTCTCCGAGTCTATATATCGACTCTGAAAAAGTGGTAATAAATGCATTGACAACTTCTTCTCTTTATTTTACAGACATTAATCCAGCACTACAAGTGGCATATAACAAG	NaN
DLD2_29to58_30snps_1	Randomly_Mutated_Window	GACAGGTTATATAATTCAAAATCTATCTTGGCTGTGGTGGAGATGGGGGCTCTACGACACAACTTCTTCTCTTTATTTTACAGACATTAATCCAGCACTACAAGTGGCATATAACAAG	7.46977
DLD2_29to58_30snps_2	Randomly_Mutated_Window	GACAGGTTATATAATTCAAAATCTATCTTTTCAGTCTCTTAACTCTTATCGGTGCAGAACAACTTCTTCTCTTTATTTTACAGACATTAATCCAGCACTACAAGTGGCATATAACAAG	11.7103
DLD2_59to88_30snps_1	Randomly_Mutated_Window	GACAGGTTATATAATTCAAAATCTATCTGACTCTGAAAAAGTGGTAATAAATGCATTGTGTCTACGGGTGTCAGTAGCCTTCATACCGAATCCAGCACTACAAGTGGCATATAACAAG	6.60716
DLD2_59to88_30snps_2	Randomly_Mutated_Window	GACAGGTTATATAATTCAAAATCTATCTGACTCTGAAAAAGTGGTAATAAATGCATTGTTGGTACTCCAATAGCCCAAGTGTTCATCGAATCCAGCACTACAAGTGGCATATAACAAG	7.29335
DLD2_89to118_30snps_1	Randomly_Mutated_Window	GACAGGTTATATAATTCAAAATCTATCTGACTCTGAAAAAGTGGTAATAAATGCATTGACAACTTCTTCTCTTTATTTTACAGACATTCTATTCCTGGGTTCGAGACGCCCGGTGTCC	4.61999
DLD2_89to118_30snps_2	Randomly_Mutated_Window	GACAGGTTATATAATTCAAAATCTATCTGACTCTGAAAAAGTGGTAATAAATGCATTGACAACTTCTTCTCTTTATTTTACAGACATTTCAATGTGTTGCGGGCCAAACGGACGACTT	NaN
DAD1_1to28_30snps_1	Randomly_Mutated_Window	CTCAGCTCCTGCGACGTGAGCGGCGATCAATAAACAGTCACCTTTAACAAGAGGAGGTAGTAATTAGCGTAGGAATAGGACTGATGAAGAGCTCGGACGTGTGAGGATATATGTACAT	NaN
DAD1_1to28_30snps_2	Randomly_Mutated_Window	TGAGGGCCCTTTTAGGTCCCCGTCGCTTAATAAACAGTCACCTTTAACAAGAGGAGGTAGTAATTAGCGTAGGAATAGGACTGATGAAGAGCTCGGACGTGTGAGGATATATGTACAT	NaN
DAD1_29to58_30snps_1	Randomly_Mutated_Window	AAGTCAAGGCCGCGAAAATAACAAAGGGCTCGTGTGTCGCTGGGATGGTGTCTTGTACAGTAATTAGCGTAGGAATAGGACTGATGAAGAGCTCGGACGTGTGAGGATATATGTACAT	NaN
DAD1_29to58_30snps_2	Randomly_Mutated_Window	AAGTCAAGGCCGCGAAAATAACAAAGGGGCAGCGTGCGACGGAGCCCTCTCCTACCCAAGTAATTAGCGTAGGAATAGGACTGATGAAGAGCTCGGACGTGTGAGGATATATGTACAT	NaN
DAD1_59to88_30snps_1	Randomly_Mutated_Window	AAGTCAAGGCCGCGAAAATAACAAAGGGAATAAACAGTCACCTTTAACAAGAGGAGGTCAGCCGACTTTGTAATGGTCTTTGACGAGGGAGCTCGGACGTGTGAGGATATATGTACAT	NaN
DAD1_59to88_30snps_2	Randomly_Mutated_Window	AAGTCAAGGCCGCGAAAATAACAAAGGGAATAAACAGTCACCTTTAACAAGAGGAGGTTTGCGCGTTTAGTCCTTAGTACAACGACGTGAGCTCGGACGTGTGAGGATATATGTACAT	NaN
DAD1_89to118_30snps_1	Randomly_Mutated_Window	AAGTCAAGGCCGCGAAAATAACAAAGGGAATAAACAGTCACCTTTAACAAGAGGAGGTAGTAATTAGCGTAGGAATAGGACTGATGAAACATCTTCCTAGTACGATTACACGAACAGG	3.82985
DAD1_89to118_30snps_2	Randomly_Mutated_Window	AAGTCAAGGCCGCGAAAATAACAAAGGGAATAAACAGTCACCTTTAACAAGAGGAGGTAGTAATTAGCGTAGGAATAGGACTGATGAAACATATTATGTATCCCTTGCTGCGTCTAGG	NaN
TPI1_1to28_30snps_1	Randomly_Mutated_Window	AGGTAGATCAGGAACGTAGCCGGCAAAGTTAATTCTAAATCAATCTTTTTCAATTTTTTGTTTGTATTCTTTTCTTGCTTAAATCTATAACTACAAAAAACACATACATAAACTAAAA	7.76203
TPI1_1to28_30snps_2	Randomly_Mutated_Window	CAAAAGAGCATACCTGCGCAGACAGCGCTTAATTCTAAATCAATCTTTTTCAATTTTTTGTTTGTATTCTTTTCTTGCTTAAATCTATAACTACAAAAAACACATACATAAACTAAAA	NaN
TPI1_29to58_30snps_1	Randomly_Mutated_Window	TTCCCTTCTTACGTAAATATTTTTCTTTGAGTGATCCCGAGCCAACGAGCAGGCCCGCTGTTTGTATTCTTTTCTTGCTTAAATCTATAACTACAAAAAACACATACATAAACTAAAA	NaN
TPI1_29to58_30snps_2	Randomly_Mutated_Window	TTCCCTTCTTACGTAAATATTTTTCTTTCACTACGGGCGGTGTAAAGCAAGCTCACGGTGTTTGTATTCTTTTCTTGCTTAAATCTATAACTACAAAAAACACATACATAAACTAAAA	3.92247
TPI1_59to88_30snps_1	Randomly_Mutated_Window	TTCCCTTCTTACGTAAATATTTTTCTTTTTAATTCTAAATCAATCTTTTTCAATTTTTAAGACTGTAAGGCCATAAATCAGGCAGAGGAACTACAAAAAACACATACATAAACTAAAA	9.00066
TPI1_59to88_30snps_2	Randomly_Mutated_Window	TTCCCTTCTTACGTAAATATTTTTCTTTTTAATTCTAAATCAATCTTTTTCAATTTTTGACAGAGCGCGGACAAGATTCGTGGGGCTGAACTACAAAAAACACATACATAAACTAAAA	0.178179
TPI1_89to118_30snps_1	Randomly_Mutated_Window	TTCCCTTCTTACGTAAATATTTTTCTTTTTAATTCTAAATCAATCTTTTTCAATTTTTTGTTTGTATTCTTTTCTTGCTTAAATCTATTGGGTGCCGGCCTGGTGCGCCCCCTCTTGT	1.87106
TPI1_89to118_30snps_2	Randomly_Mutated_Window	TTCCCTTCTTACGTAAATATTTTTCTTTTTAATTCTAAATCAATCTTTTTCAATTTTTTGTTTGTATTCTTTTCTTGCTTAAATCTATGGTATGCTTCCCATTTCGGTATTCACCGGC	NaN
VMA8_1to28_30snps_1	Randomly_Mutated_Window	CTTGAACCGCCAGCGGGTACGCCATAGCGTACAGATAAAGGTTAGATGAAGCAGCAGTAGAATAAATCAGCATCTGTAGTACATAGGTTCCTAACAGCATTGTGAAAAAGGTTCAAAA	NaN
VMA8_1to28_30snps_2	Randomly_Mutated_Window	TTTTCAAAGCGAGGGCTCATGCCCAAGCGTACAGATAAAGGTTAGATGAAGCAGCAGTAGAATAAATCAGCATCTGTAGTACATAGGTTCCTAACAGCATTGTGAAAAAGGTTCAAAA	NaN
VMA8_29to58_30snps_1	Randomly_Mutated_Window	GAACGGGGATTGTTAAAAGACAATGGCAAGCGTTGGGCCAACCTACATTCCGGTGGTAAGAATAAATCAGCATCTGTAGTACATAGGTTCCTAACAGCATTGTGAAAAAGGTTCAAAA	6.01115
VMA8_29to58_30snps_2	Randomly_Mutated_Window	GAACGGGGATTGTTAAAAGACAATGGCAAAGACTCAGCGCAACTACAACCTTTAATACAGAATAAATCAGCATCTGTAGTACATAGGTTCCTAACAGCATTGTGAAAAAGGTTCAAAA	7.57833
VMA8_59to88_30snps_1	Randomly_Mutated_Window	GAACGGGGATTGTTAAAAGACAATGGCAGTACAGATAAAGGTTAGATGAAGCAGCAGTTAGTCCTTGGCTAGAGAAAGCGGATCCTCGTCCTAACAGCATTGTGAAAAAGGTTCAAAA	5.6404
VMA8_59to88_30snps_2	Randomly_Mutated_Window	GAACGGGGATTGTTAAAAGACAATGGCAGTACAGATAAAGGTTAGATGAAGCAGCAGTGATGGCCGAACCTCCGAAGGCGTGGACTCCTCCTAACAGCATTGTGAAAAAGGTTCAAAA	3.34534
VMA8_89to118_30snps_1	Randomly_Mutated_Window	GAACGGGGATTGTTAAAAGACAATGGCAGTACAGATAAAGGTTAGATGAAGCAGCAGTAGAATAAATCAGCATCTGTAGTACATAGGTAGAGGTGCTGTGAACTGTTCGACGATTGGC	5.66761
VMA8_89to118_30snps_2	Randomly_Mutated_Window	GAACGGGGATTGTTAAAAGACAATGGCAGTACAGATAAAGGTTAGATGAAGCAGCAGTAGAATAAATCAGCATCTGTAGTACATAGGTGGTGCTACCTTGGTCAGCGGGCCGAACCTG	1.75561
PRS2_1to28_30snps_1	Randomly_Mutated_Window	GGGGGAGGGAGTATTTGCGCCACATCGTAATAGATGATATGAGGAGGCATCGAGGGATTGCTAAGAAGAGGATATTCCTCATCATCCAAAGACTATCTTGTCGTAAGTTTCGTTGAAT	NaN
PRS2_1to28_30snps_2	Randomly_Mutated_Window	TAGAGGACGGCCCTCTGGGTAGACCCCGAATAGATGATATGAGGAGGCATCGAGGGATTGCTAAGAAGAGGATATTCCTCATCATCCAAAGACTATCTTGTCGTAAGTTTCGTTGAAT	3.26455
PRS2_29to58_30snps_1	Randomly_Mutated_Window	ATTTTTCAACAATGAAAAAATTTTGAACGGCTATGCGCTGCCCTGCCTCATCCCCTGGTGCTAAGAAGAGGATATTCCTCATCATCCAAAGACTATCTTGTCGTAAGTTTCGTTGAAT	2.97859
PRS2_29to58_30snps_2	Randomly_Mutated_Window	ATTTTTCAACAATGAAAAAATTTTGAACTGCCTTCATAGATGAACTTGTCACCAACTCTGCTAAGAAGAGGATATTCCTCATCATCCAAAGACTATCTTGTCGTAAGTTTCGTTGAAT	5.33697
PRS2_59to88_30snps_1	Randomly_Mutated_Window	ATTTTTCAACAATGAAAAAATTTTGAACAATAGATGATATGAGGAGGCATCGAGGGATAATGGGATCATCTCCGGGGTGATGACCTACAAGACTATCTTGTCGTAAGTTTCGTTGAAT	1.28953
PRS2_59to88_30snps_2	Randomly_Mutated_Window	ATTTTTCAACAATGAAAAAATTTTGAACAATAGATGATATGAGGAGGCATCGAGGGATGAGCGCACTTGACGGTGGGGCACGTTAATGAAGACTATCTTGTCGTAAGTTTCGTTGAAT	2.29124
PRS2_89to118_30snps_1	Randomly_Mutated_Window	ATTTTTCAACAATGAAAAAATTTTGAACAATAGATGATATGAGGAGGCATCGAGGGATTGCTAAGAAGAGGATATTCCTCATCATCCATCACACGGGAGTCACGCTAACCACGGAGCC	4.43213
PRS2_89to118_30snps_2	Randomly_Mutated_Window	ATTTTTCAACAATGAAAAAATTTTGAACAATAGATGATATGAGGAGGCATCGAGGGATTGCTAAGAAGAGGATATTCCTCATCATCCATCTGGCTCGCCAATAACGCCCCATGGTCGC	NaN
DEG1_1to28_30snps_1	Randomly_Mutated_Window	CACGCCACGAGACCAACGGTGAGCCCTTAAGCGAAAAGCCGGCTCAAAATAAAGAATAATATAGTATTCTCGAGGTGCCCACATGCAATCTTTACTGCCCTACTATAACCTCCCTTGA	2.59677
DEG1_1to28_30snps_2	Randomly_Mutated_Window	GTCCCCCCCCCTTAGAGTCTTAAGGAATAAGCGAAAAGCCGGCTCAAAATAAAGAATAATATAGTATTCTCGAGGTGCCCACATGCAATCTTTACTGCCCTACTATAACCTCCCTTGA	2.53986
DEG1_29to58_30snps_1	Randomly_Mutated_Window	ACTTTGTTTTTCAGTGAAAAATTTTTGAGGTATTCGGTGTCAAGTCCTCCGTCATCAGATATAGTATTCTCGAGGTGCCCACATGCAATCTTTACTGCCCTACTATAACCTCCCTTGA	1.6596
DEG1_29to58_30snps_2	Randomly_Mutated_Window	ACTTTGTTTTTCAGTGAAAAATTTTTGATGCAATCTTTTAATTAGGCGTACTTACGGCATATAGTATTCTCGAGGTGCCCACATGCAATCTTTACTGCCCTACTATAACCTCCCTTGA	3.33908
DEG1_59to88_30snps_1	Randomly_Mutated_Window	ACTTTGTTTTTCAGTGAAAAATTTTTGAAAGCGAAAAGCCGGCTCAAAATAAAGAATACACCGACGCCAAGACTAGCAGAGGCACTCGTCTTTACTGCCCTACTATAACCTCCCTTGA	3.53955
DEG1_59to88_30snps_2	Randomly_Mutated_Window	ACTTTGTTTTTCAGTGAAAAATTTTTGAAAGCGAAAAGCCGGCTCAAAATAAAGAATACATGCTAGAAAGTTGCTCTGTAGTGAAGTGTCTTTACTGCCCTACTATAACCTCCCTTGA	3.43988
DEG1_89to118_30snps_1	Randomly_Mutated_Window	ACTTTGTTTTTCAGTGAAAAATTTTTGAAAGCGAAAAGCCGGCTCAAAATAAAGAATAATATAGTATTCTCGAGGTGCCCACATGCAACTGCCCAACGTACTTGCCTCAACAAGAACT	3.40422
DEG1_89to118_30snps_2	Randomly_Mutated_Window	ACTTTGTTTTTCAGTGAAAAATTTTTGAAAGCGAAAAGCCGGCTCAAAATAAAGAATAATATAGTATTCTCGAGGTGCCCACATGCAAAGCCCCTGAATGGGGCTATGAAGGTGGGTC	NaN
YHL012W_1to28_30snps_1	Randomly_Mutated_Window	GGACATAAAGACCGGCCGACAGTTGTCCGAATTTAACGATAACTGACACAAGTGATTCTTGATAATAAAAAAAAAAAGGAAAAATATTTCACTGTTCTACATAGTATATACAAGATCA	NaN
YHL012W_1to28_30snps_2	Randomly_Mutated_Window	TGATGTGCCGGCGCTCGAGCAGCCGGGAGAATTTAACGATAACTGACACAAGTGATTCTTGATAATAAAAAAAAAAAGGAAAAATATTTCACTGTTCTACATAGTATATACAAGATCA	4.44149
YHL012W_29to58_30snps_1	Randomly_Mutated_Window	CTGGCATTTACAATCTTTTTGTAACCTGCGTCCGCTGCCACGTGTGGTATGAAATCAGTTGATAATAAAAAAAAAAAGGAAAAATATTTCACTGTTCTACATAGTATATACAAGATCA	3.73166
YHL012W_29to58_30snps_2	Randomly_Mutated_Window	CTGGCATTTACAATCTTTTTGTAACCTGCTTCGAGTTTCCTGGGCGGTACGTGCTCGATTGATAATAAAAAAAAAAAGGAAAAATATTTCACTGTTCTACATAGTATATACAAGATCA	2.86422
YHL012W_59to88_30snps_1	Randomly_Mutated_Window	CTGGCATTTACAATCTTTTTGTAACCTGGAATTTAACGATAACTGACACAAGTGATTCGACCCGCCGCGGGGCTTCGATTTTGGACACTCACTGTTCTACATAGTATATACAAGATCA	3.82652
YHL012W_59to88_30snps_2	Randomly_Mutated_Window	CTGGCATTTACAATCTTTTTGTAACCTGGAATTTAACGATAACTGACACAAGTGATTCCGCCCCGAGCCGCGTTGGTTATTGTTCTCATCACTGTTCTACATAGTATATACAAGATCA	4.34583
YHL012W_89to118_30snps_1	Randomly_Mutated_Window	CTGGCATTTACAATCTTTTTGTAACCTGGAATTTAACGATAACTGACACAAGTGATTCTTGATAATAAAAAAAAAAAGGAAAAATATTGGGTATCAGATGTCCCACCCAGGTCCTGGC	NaN
YHL012W_89to118_30snps_2	Randomly_Mutated_Window	CTGGCATTTACAATCTTTTTGTAACCTGGAATTTAACGATAACTGACACAAGTGATTCTTGATAATAAAAAAAAAAAGGAAAAATATTCTGGCCCGTACGCATTAGCCGTGTCCCCGG	4.89432
SGA1_1to28_30snps_1	Randomly_Mutated_Window	AGCGAGTTGGAAAGACAAGGCCGATGACTATCTGTTCTGTTACACAAGAAATCGTACATTTACAATATAGTGATAATCGTGGACTAGAGCAAGATTTCAAATAAGTAACAGCAGCAAA	8.04413
SGA1_1to28_30snps_2	Randomly_Mutated_Window	CCACGGAGCGGGCAACGAAATTCGGACGTATCTGTTCTGTTACACAAGAAATCGTACATTTACAATATAGTGATAATCGTGGACTAGAGCAAGATTTCAAATAAGTAACAGCAGCAAA	7.21456
SGA1_29to58_30snps_1	Randomly_Mutated_Window	TTTTCTCATCTCTTGGCTCTGGATCCGTCGCGCAGAGCTAGCACACGATGCGGTACGTTTTACAATATAGTGATAATCGTGGACTAGAGCAAGATTTCAAATAAGTAACAGCAGCAAA	6.36039
SGA1_29to58_30snps_2	Randomly_Mutated_Window	TTTTCTCATCTCTTGGCTCTGGATCCGTGTATACGATGCACCGCGCGCGGTCTAGCGTTTTACAATATAGTGATAATCGTGGACTAGAGCAAGATTTCAAATAAGTAACAGCAGCAAA	NaN
SGA1_59to88_30snps_1	Randomly_Mutated_Window	TTTTCTCATCTCTTGGCTCTGGATCCGTTATCTGTTCTGTTACACAAGAAATCGTACAGAACAGTCTGTTAACCTGGAACCATTCCCCGCAAGATTTCAAATAAGTAACAGCAGCAAA	NaN
SGA1_59to88_30snps_2	Randomly_Mutated_Window	TTTTCTCATCTCTTGGCTCTGGATCCGTTATCTGTTCTGTTACACAAGAAATCGTACAGAGCTCTCGGCAAACCCCGTACTATAATCCGCAAGATTTCAAATAAGTAACAGCAGCAAA	NaN
SGA1_89to118_30snps_1	Randomly_Mutated_Window	TTTTCTCATCTCTTGGCTCTGGATCCGTTATCTGTTCTGTTACACAAGAAATCGTACATTTACAATATAGTGATAATCGTGGACTAGACGTTCTGGAGTGCCCGACGCGTAATATCGT	7.27643
SGA1_89to118_30snps_2	Randomly_Mutated_Window	TTTTCTCATCTCTTGGCTCTGGATCCGTTATCTGTTCTGTTACACAAGAAATCGTACATTTACAATATAGTGATAATCGTGGACTAGAAACGCTCGCGCGTCCTCCCCGCCAGTATGT	NaN
GAT4_1to28_30snps_1	Randomly_Mutated_Window	GATACCTGACAGGACATGTTATCGTCCTCGTGAAACCACATAAACATTTTACTCTTTAACTGCTCAAAAAGCTGGCACTTTCTGTTCCTAGCTAGAAACATAACATTACAGGGTCGCT	5.99512
GAT4_1to28_30snps_2	Randomly_Mutated_Window	GCAGCACGGTCAGCACTGGGAACCCAGTCGTGAAACCACATAAACATTTTACTCTTTAACTGCTCAAAAAGCTGGCACTTTCTGTTCCTAGCTAGAAACATAACATTACAGGGTCGCT	4.24458
GAT4_29to58_30snps_1	Randomly_Mutated_Window	CGCCAGGCTAGTCTTTCACATGTAAGTCTACACTCTTTATCCGCGGCCGACTCACCCTACTGCTCAAAAAGCTGGCACTTTCTGTTCCTAGCTAGAAACATAACATTACAGGGTCGCT	3.3693
GAT4_29to58_30snps_2	Randomly_Mutated_Window	CGCCAGGCTAGTCTTTCACATGTAAGTCAACTCCGGTCGGGGCGGGGCCACACGACCTACTGCTCAAAAAGCTGGCACTTTCTGTTCCTAGCTAGAAACATAACATTACAGGGTCGCT	NaN
GAT4_59to88_30snps_1	Randomly_Mutated_Window	CGCCAGGCTAGTCTTTCACATGTAAGTCCGTGAAACCACATAAACATTTTACTCTTTAGTCTTGTGGGGTCGCCCTCAGGAGGAGCAGTAGCTAGAAACATAACATTACAGGGTCGCT	NaN
GAT4_59to88_30snps_2	Randomly_Mutated_Window	CGCCAGGCTAGTCTTTCACATGTAAGTCCGTGAAACCACATAAACATTTTACTCTTTACACAGCACTCCGCTATCATAGACTATGCTTTAGCTAGAAACATAACATTACAGGGTCGCT	3.3693
GAT4_89to118_30snps_1	Randomly_Mutated_Window	CGCCAGGCTAGTCTTTCACATGTAAGTCCGTGAAACCACATAAACATTTTACTCTTTAACTGCTCAAAAAGCTGGCACTTTCTGTTCCCCCGATATGTACCGCAGAGGGTAACGATTC	NaN
GAT4_89to118_30snps_2	Randomly_Mutated_Window	CGCCAGGCTAGTCTTTCACATGTAAGTCCGTGAAACCACATAAACATTTTACTCTTTAACTGCTCAAAAAGCTGGCACTTTCTGTTCCACAGGTTGCTTGCCTACACCTCCTACGAAA	2.91725
MAD2_1to28_30snps_1	Randomly_Mutated_Window	GGTAGCCTTCCGGATTGCGGGTTCAGTCAGAATAGAAATCGCCCCGAAGAATGATTGATGTTAAATACTCGTACAAGAGTATTGAAAACCACTTCAAAGGGGCCCAATAGCACATTTA	2.76537
MAD2_1to28_30snps_2	Randomly_Mutated_Window	CTAAGTCTTACAGAATAGGTGTGGCCAGAGAATAGAAATCGCCCCGAAGAATGATTGATGTTAAATACTCGTACAAGAGTATTGAAAACCACTTCAAAGGGGCCCAATAGCACATTTA	3.57649
MAD2_29to58_30snps_1	Randomly_Mutated_Window	TACGTATGGTTTATGATTTAACATTTCAGTCCCTAGTCGTAAGGGACGCCGGACGATGTGTTAAATACTCGTACAAGAGTATTGAAAACCACTTCAAAGGGGCCCAATAGCACATTTA	3.49647
MAD2_29to58_30snps_2	Randomly_Mutated_Window	TACGTATGGTTTATGATTTAACATTTCAGACTCTTGCGCACAATATCCTTGATGCGTTTGTTAAATACTCGTACAAGAGTATTGAAAACCACTTCAAAGGGGCCCAATAGCACATTTA	4.52418
MAD2_59to88_30snps_1	Randomly_Mutated_Window	TACGTATGGTTTATGATTTAACATTTCAAGAATAGAAATCGCCCCGAAGAATGATTGACACAGCCGGACACGTTGGTCAGTCATCGGGCCACTTCAAAGGGGCCCAATAGCACATTTA	1.71213
MAD2_59to88_30snps_2	Randomly_Mutated_Window	TACGTATGGTTTATGATTTAACATTTCAAGAATAGAAATCGCCCCGAAGAATGATTGACTGAGGGATTAGTCTGCGTGAGGGGCGGGTCCACTTCAAAGGGGCCCAATAGCACATTTA	1.24201
MAD2_89to118_30snps_1	Randomly_Mutated_Window	TACGTATGGTTTATGATTTAACATTTCAAGAATAGAAATCGCCCCGAAGAATGATTGATGTTAAATACTCGTACAAGAGTATTGAAAAGTCTAATTTCATCAAAATCGTAGCGGAAAC	4.29265
MAD2_89to118_30snps_2	Randomly_Mutated_Window	TACGTATGGTTTATGATTTAACATTTCAAGAATAGAAATCGCCCCGAAGAATGATTGATGTTAAATACTCGTACAAGAGTATTGAAAAGAGTAAATGTCATCAGGCCACCGGGTCGCT	NaN
GLG2_1to28_30snps_1	Randomly_Mutated_Window	TGTACTCTGCTCTCCCTACCAGCATCTCATAGCGCATCCACCTCCAAAAGCATTTTTTTACTTATACATCGTGTCATTTTTTTGAATATCTATCAGAAGTAAGGTTTGTTACGGAGCT	NaN
GLG2_1to28_30snps_2	Randomly_Mutated_Window	GAGCGCTATCACAATAGAATCTAATTCCATAGCGCATCCACCTCCAAAAGCATTTTTTTACTTATACATCGTGTCATTTTTTTGAATATCTATCAGAAGTAAGGTTTGTTACGGAGCT	3.04223
GLG2_29to58_30snps_1	Randomly_Mutated_Window	ATATAAAGATGAGGGGAGTAGATCAAGGTGGCTAGTCTGCAAGAGCGGCCATAGACCCTACTTATACATCGTGTCATTTTTTTGAATATCTATCAGAAGTAAGGTTTGTTACGGAGCT	10.3141
GLG2_29to58_30snps_2	Randomly_Mutated_Window	ATATAAAGATGAGGGGAGTAGATCAAGGTGCAAATGGAGGAGGATCCGGTAGGGAAGCTACTTATACATCGTGTCATTTTTTTGAATATCTATCAGAAGTAAGGTTTGTTACGGAGCT	9.85086
GLG2_59to88_30snps_1	Randomly_Mutated_Window	ATATAAAGATGAGGGGAGTAGATCAAGGATAGCGCATCCACCTCCAAAAGCATTTTTTCTAGATGTAGGACCCATTCCCCCACCGCATTCTATCAGAAGTAAGGTTTGTTACGGAGCT	NaN
GLG2_59to88_30snps_2	Randomly_Mutated_Window	ATATAAAGATGAGGGGAGTAGATCAAGGATAGCGCATCCACCTCCAAAAGCATTTTTTATAGCTATATATAGCAACACCCCCCAGCGTTCTATCAGAAGTAAGGTTTGTTACGGAGCT	10.5538
GLG2_89to118_30snps_1	Randomly_Mutated_Window	ATATAAAGATGAGGGGAGTAGATCAAGGATAGCGCATCCACCTCCAAAAGCATTTTTTTACTTATACATCGTGTCATTTTTTTGAATACTACAATAGGACCGTAGAATGGTTACTCAA	NaN
GLG2_89to118_30snps_2	Randomly_Mutated_Window	ATATAAAGATGAGGGGAGTAGATCAAGGATAGCGCATCCACCTCCAAAAGCATTTTTTTACTTATACATCGTGTCATTTTTTTGAATAAAACCATTGGTGGTCTCGGCCGGATACTGA	10.7598
CDC8_1to28_30snps_1	Randomly_Mutated_Window	TACCTGAGGTCGTGCAGCCCAACTCCAGTAAAGATGGCGAAAAAATGTAACGTCTTCCCAAGAAGTACGCTTCTAAACTAAATATGATTCATAGTGGACAGAAAGATCACCATTTTGA	3.23135
CDC8_1to28_30snps_2	Randomly_Mutated_Window	CCATTGGGCATTCATGCCTCGCGCCGAATAAAGATGGCGAAAAAATGTAACGTCTTCCCAAGAAGTACGCTTCTAAACTAAATATGATTCATAGTGGACAGAAAGATCACCATTTTGA	4.33342
CDC8_29to58_30snps_1	Randomly_Mutated_Window	GTGACTTTTGACGCGTTAGGCGTGGTGCGGGCTCACAAACCTGCTCCACGACGAGGGGCAAGAAGTACGCTTCTAAACTAAATATGATTCATAGTGGACAGAAAGATCACCATTTTGA	0.613095
CDC8_29to58_30snps_2	Randomly_Mutated_Window	GTGACTTTTGACGCGTTAGGCGTGGTGCACCCACAAAGTCCGTTGAAGCGTTGAAGTACAAGAAGTACGCTTCTAAACTAAATATGATTCATAGTGGACAGAAAGATCACCATTTTGA	3.11242
CDC8_59to88_30snps_1	Randomly_Mutated_Window	GTGACTTTTGACGCGTTAGGCGTGGTGCTAAAGATGGCGAAAAAATGTAACGTCTTCCTTTATCTGCACTAGAAGGTGGCCTCTCCGATCATAGTGGACAGAAAGATCACCATTTTGA	3.99409
CDC8_59to88_30snps_2	Randomly_Mutated_Window	GTGACTTTTGACGCGTTAGGCGTGGTGCTAAAGATGGCGAAAAAATGTAACGTCTTCCACTCTGAAGGTTACGGCTCAAGTCACGATCTCATAGTGGACAGAAAGATCACCATTTTGA	4.2569
CDC8_89to118_30snps_1	Randomly_Mutated_Window	GTGACTTTTGACGCGTTAGGCGTGGTGCTAAAGATGGCGAAAAAATGTAACGTCTTCCCAAGAAGTACGCTTCTAAACTAAATATGATATCAGCCTTGGTCTCTACCGTTGCCGCACG	3.56934
CDC8_89to118_30snps_2	Randomly_Mutated_Window	GTGACTTTTGACGCGTTAGGCGTGGTGCTAAAGATGGCGAAAAAATGTAACGTCTTCCCAAGAAGTACGCTTCTAAACTAAATATGATATGCCCGCTCATATCTATCTCAGCACACTT	NaN
PNP1_1to28_30snps_1	Randomly_Mutated_Window	CGGTCCCAGCGTGCTCTGGTATGGGGGGCGAAGCAGAGGGCAGATAGGGCAGGCATAACTTTAGGATAATCTTGCTAATCTTCTAGAACACATGAGAAACTCCGAATAAACTTAAAAG	NaN
PNP1_1to28_30snps_2	Randomly_Mutated_Window	ACGTCTTCAAGGTGTGCTCTTGTGCGTGCGAAGCAGAGGGCAGATAGGGCAGGCATAACTTTAGGATAATCTTGCTAATCTTCTAGAACACATGAGAAACTCCGAATAAACTTAAAAG	NaN
PNP1_29to58_30snps_1	Randomly_Mutated_Window	TTACAAAGCGCAAAGAAAAGGAAAATCTGACGATCTCATCATTTCTATTTCATTTCCTCTTTAGGATAATCTTGCTAATCTTCTAGAACACATGAGAAACTCCGAATAAACTTAAAAG	NaN
PNP1_29to58_30snps_2	Randomly_Mutated_Window	TTACAAAGCGCAAAGAAAAGGAAAATCTTATGCATTTCATATCGAGCCATGACACGTTCTTTAGGATAATCTTGCTAATCTTCTAGAACACATGAGAAACTCCGAATAAACTTAAAAG	NaN
PNP1_59to88_30snps_1	Randomly_Mutated_Window	TTACAAAGCGCAAAGAAAAGGAAAATCTCGAAGCAGAGGGCAGATAGGGCAGGCATAAAGGACATTCTGAGGGATAGGCAAAGGCACGCACATGAGAAACTCCGAATAAACTTAAAAG	NaN
PNP1_59to88_30snps_2	Randomly_Mutated_Window	TTACAAAGCGCAAAGAAAAGGAAAATCTCGAAGCAGAGGGCAGATAGGGCAGGCATAAGACGCAACGCCATGGATGCCCGGGGCGAGGCACATGAGAAACTCCGAATAAACTTAAAAG	NaN
PNP1_89to118_30snps_1	Randomly_Mutated_Window	TTACAAAGCGCAAAGAAAAGGAAAATCTCGAAGCAGAGGGCAGATAGGGCAGGCATAACTTTAGGATAATCTTGCTAATCTTCTAGAAGCTTCCCTTCGGGATACGAGGGGGCTCCCT	NaN
PNP1_89to118_30snps_2	Randomly_Mutated_Window	TTACAAAGCGCAAAGAAAAGGAAAATCTCGAAGCAGAGGGCAGATAGGGCAGGCATAACTTTAGGATAATCTTGCTAATCTTCTAGAATGTCAAGCGCGGCTGACGCCCTGGGCGCGA	5.96202
SEC22_1to28_30snps_1	Randomly_Mutated_Window	GGCGGCTGTCATGTGGTCCCCCTGGGGGGTAATATAATATATCTACAACCTATTATTACCCAAAACCAACAAAAACCCTGACAGTGACACCCCGTTACACACTCACAATTAAGTAGGG	2.61947
SEC22_1to28_30snps_2	Randomly_Mutated_Window	AATAGCCCATATCGTGGTGTCCAGGACGGTAATATAATATATCTACAACCTATTATTACCCAAAACCAACAAAAACCCTGACAGTGACACCCCGTTACACACTCACAATTAAGTAGGG	4.21044
SEC22_29to58_30snps_1	Randomly_Mutated_Window	CCATAGAAGATAAACAAGTAGAGCCCATACTTGCGCCCCCTCTATGGGATACGGCCGGCCCAAAACCAACAAAAACCCTGACAGTGACACCCCGTTACACACTCACAATTAAGTAGGG	0.716623
SEC22_29to58_30snps_2	Randomly_Mutated_Window	CCATAGAAGATAAACAAGTAGAGCCCATAATGGGCGTGCACATGCTGGAACTAACGATCCCAAAACCAACAAAAACCCTGACAGTGACACCCCGTTACACACTCACAATTAAGTAGGG	2.57184
SEC22_59to88_30snps_1	Randomly_Mutated_Window	CCATAGAAGATAAACAAGTAGAGCCCATGTAATATAATATATCTACAACCTATTATTAATATTCGGTGTGCGTGTTATGTTGGAGACAACCCCGTTACACACTCACAATTAAGTAGGG	3.5465
SEC22_59to88_30snps_2	Randomly_Mutated_Window	CCATAGAAGATAAACAAGTAGAGCCCATGTAATATAATATATCTACAACCTATTATTATATTCCTGTGCGGGCGGGTGCATGCAGAGTACCCCGTTACACACTCACAATTAAGTAGGG	3.19889
SEC22_89to118_30snps_1	Randomly_Mutated_Window	CCATAGAAGATAAACAAGTAGAGCCCATGTAATATAATATATCTACAACCTATTATTACCCAAAACCAACAAAAACCCTGACAGTGACCGGGACAATGCTCGGACGGCGAGGAACAAT	NaN
SEC22_89to118_30snps_2	Randomly_Mutated_Window	CCATAGAAGATAAACAAGTAGAGCCCATGTAATATAATATATCTACAACCTATTATTACCCAAAACCAACAAAAACCCTGACAGTGACTTGGAACCCTCGTTAGTTGCCACCAGCTCA	6.81249
KAR1_1to28_30snps_1	Randomly_Mutated_Window	GAGGGTACCCTTTCCACTCAGCTGTATCTTTTATTTTCGAAGAAACGTCCTAAAAGGATCTGATTCAGCACATTGATAATAGCATAGGCATTTTTATCTTTCTTTTTTGAGTTCATGA	NaN
KAR1_1to28_30snps_2	Randomly_Mutated_Window	TACGGAGGCCCTTCCTGCGGGTAGTGGATTTTATTTTCGAAGAAACGTCCTAAAAGGATCTGATTCAGCACATTGATAATAGCATAGGCATTTTTATCTTTCTTTTTTGAGTTCATGA	NaN
KAR1_29to58_30snps_1	Randomly_Mutated_Window	CCACAGCTGAAAGATCTAACAGGCGTATGACAGAACCTTCGCGCCGAATGCCGTGATCTCTGATTCAGCACATTGATAATAGCATAGGCATTTTTATCTTTCTTTTTTGAGTTCATGA	NaN
KAR1_29to58_30snps_2	Randomly_Mutated_Window	CCACAGCTGAAAGATCTAACAGGCGTATCCGACGAAGGCTTCTCCTAAGTAGGCGTTTTCTGATTCAGCACATTGATAATAGCATAGGCATTTTTATCTTTCTTTTTTGAGTTCATGA	NaN
KAR1_59to88_30snps_1	Randomly_Mutated_Window	CCACAGCTGAAAGATCTAACAGGCGTATTTTTATTTTCGAAGAAACGTCCTAAAAGGAGTACGGATTTTTGTCGTGAGCCGCAGCTCACATTTTTATCTTTCTTTTTTGAGTTCATGA	NaN
KAR1_59to88_30snps_2	Randomly_Mutated_Window	CCACAGCTGAAAGATCTAACAGGCGTATTTTTATTTTCGAAGAAACGTCCTAAAAGGAAACCGAGATCTGGCGCTCGCGCGCATGGATCATTTTTATCTTTCTTTTTTGAGTTCATGA	NaN
KAR1_89to118_30snps_1	Randomly_Mutated_Window	CCACAGCTGAAAGATCTAACAGGCGTATTTTTATTTTCGAAGAAACGTCCTAAAAGGATCTGATTCAGCACATTGATAATAGCATAGGACGCAGAGCTCCGTACGGGCTTAACAGAAT	5.13646
KAR1_89to118_30snps_2	Randomly_Mutated_Window	CCACAGCTGAAAGATCTAACAGGCGTATTTTTATTTTCGAAGAAACGTCCTAAAAGGATCTGATTCAGCACATTGATAATAGCATAGGTTAACCGCGTAAAAACCGCATGAAATCGAT	NaN
DAL82_1to28_30snps_1	Randomly_Mutated_Window	GAGAACTCGATAGGACACCGACGCGACCAATAAGCGTTATTTCCATTCGGGTGAGTTGAACCATTGATAACAACATGGTTTAACGATACTTTGAAAGGTTTAGGCGGAGCCAACCATA	3.46874
DAL82_1to28_30snps_2	Randomly_Mutated_Window	CAAGGCACGGGCAGATAGTTAAGTAATGAATAAGCGTTATTTCCATTCGGGTGAGTTGAACCATTGATAACAACATGGTTTAACGATACTTTGAAAGGTTTAGGCGGAGCCAACCATA	3.52045
DAL82_29to58_30snps_1	Randomly_Mutated_Window	TCTTCACATCCTTCGATTACGGCGTCAAGCACGTACCGTAGCTGCGGTTCTATCAGGAAACCATTGATAACAACATGGTTTAACGATACTTTGAAAGGTTTAGGCGGAGCCAACCATA	1.2673
DAL82_29to58_30snps_2	Randomly_Mutated_Window	TCTTCACATCCTTCGATTACGGCGTCAATGGTTCAAAATACCAGTAATCCAACGAACAAACCATTGATAACAACATGGTTTAACGATACTTTGAAAGGTTTAGGCGGAGCCAACCATA	3.68782
DAL82_59to88_30snps_1	Randomly_Mutated_Window	TCTTCACATCCTTCGATTACGGCGTCAAAATAAGCGTTATTTCCATTCGGGTGAGTTGTCGTGCGTGCGCGCGAGAATGGCCGTCTGTCTTTGAAAGGTTTAGGCGGAGCCAACCATA	1.45319
DAL82_59to88_30snps_2	Randomly_Mutated_Window	TCTTCACATCCTTCGATTACGGCGTCAAAATAAGCGTTATTTCCATTCGGGTGAGTTGTGGTCGATGCGTACGTCGTAAGGCGATCACCTTTGAAAGGTTTAGGCGGAGCCAACCATA	2.75839
DAL82_89to118_30snps_1	Randomly_Mutated_Window	TCTTCACATCCTTCGATTACGGCGTCAAAATAAGCGTTATTTCCATTCGGGTGAGTTGAACCATTGATAACAACATGGTTTAACGATAGCAGAGCGCCGAATTATAACATATTGAGCC	NaN
DAL82_89to118_30snps_2	Randomly_Mutated_Window	TCTTCACATCCTTCGATTACGGCGTCAAAATAAGCGTTATTTCCATTCGGGTGAGTTGAACCATTGATAACAACATGGTTTAACGATATAACAGTCCAGAACCTTAACCAATTGGTAT	NaN
CDC31_1to28_30snps_1	Randomly_Mutated_Window	ATGGCTGAGCATATTTTAGCGCTAGGCGAAAGAAGAATCCTAATTAGTAAGTATGGAAGAGATTTATTAAACGAGAAAGGAAGTGAACCAAAGAAGAAACGGAAATAAATCATACAGT	8.00449
CDC31_1to28_30snps_2	Randomly_Mutated_Window	TGAACTGATAATATCTCACTCACCCCGTAAAGAAGAATCCTAATTAGTAAGTATGGAAGAGATTTATTAAACGAGAAAGGAAGTGAACCAAAGAAGAAACGGAAATAAATCATACAGT	7.24758
CDC31_29to58_30snps_1	Randomly_Mutated_Window	GCTTAACTATTGCGAAATAGAGAGAAAACTCACTCCGCTGAGGCATACCGTACAAAGCGAGATTTATTAAACGAGAAAGGAAGTGAACCAAAGAAGAAACGGAAATAAATCATACAGT	3.17094
CDC31_29to58_30snps_2	Randomly_Mutated_Window	GCTTAACTATTGCGAAATAGAGAGAAAACGCAGGCTTAAAGTGACGACTGCGCGTTTCGAGATTTATTAAACGAGAAAGGAAGTGAACCAAAGAAGAAACGGAAATAAATCATACAGT	NaN
CDC31_59to88_30snps_1	Randomly_Mutated_Window	GCTTAACTATTGCGAAATAGAGAGAAAAAAAGAAGAATCCTAATTAGTAAGTATGGAACTCGGCGCCCCTCATCATCCAAGCTGTTCACAAAGAAGAAACGGAAATAAATCATACAGT	5.32035
CDC31_59to88_30snps_2	Randomly_Mutated_Window	GCTTAACTATTGCGAAATAGAGAGAAAAAAAGAAGAATCCTAATTAGTAAGTATGGAATCCGAGACCAGGCGAGATTCACGTACTTCGCAAAGAAGAAACGGAAATAAATCATACAGT	4.52939
CDC31_89to118_30snps_1	Randomly_Mutated_Window	GCTTAACTATTGCGAAATAGAGAGAAAAAAAGAAGAATCCTAATTAGTAAGTATGGAAGAGATTTATTAAACGAGAAAGGAAGTGAACTGCCCTGATTCTCTTCGGGGTGTTATGTCG	NaN
CDC31_89to118_30snps_2	Randomly_Mutated_Window	GCTTAACTATTGCGAAATAGAGAGAAAAAAAGAAGAATCCTAATTAGTAAGTATGGAAGAGATTTATTAAACGAGAAAGGAAGTGAACTTGGACTAGTGGCTCCGCGTGCAGCGATCA	NaN
MET31_1to28_30snps_1	Randomly_Mutated_Window	CAGCTCACTTCTGCTACGTTGAATGTTTAAAAAGAAAAAGCCGTTCCTCAGTACGTAAAGAGATTTGATCATTAACAAGTTGGGCTCAATATACACAGTCGATAGTCTATATGTGCAT	NaN
MET31_1to28_30snps_2	Randomly_Mutated_Window	GGAGGGCAATTTTGCACTGTATTTATCCAAAAAGAAAAAGCCGTTCCTCAGTACGTAAAGAGATTTGATCATTAACAAGTTGGGCTCAATATACACAGTCGATAGTCTATATGTGCAT	NaN
MET31_29to58_30snps_1	Randomly_Mutated_Window	TTCTAATGCAAAATATAACATGGGTAAGCTCCGCGGCCGTTATGAGACGGCCGGTCGCAGAGATTTGATCATTAACAAGTTGGGCTCAATATACACAGTCGATAGTCTATATGTGCAT	NaN
MET31_29to58_30snps_2	Randomly_Mutated_Window	TTCTAATGCAAAATATAACATGGGTAAGGGTTTATGGGCCGTCAAATCGGCGCGCGTCAGAGATTTGATCATTAACAAGTTGGGCTCAATATACACAGTCGATAGTCTATATGTGCAT	NaN
MET31_59to88_30snps_1	Randomly_Mutated_Window	TTCTAATGCAAAATATAACATGGGTAAGAAAAAGAAAAAGCCGTTCCTCAGTACGTAAGATACACCTGATGCCGTGCGAAGCTATCGTATATACACAGTCGATAGTCTATATGTGCAT	NaN
MET31_59to88_30snps_2	Randomly_Mutated_Window	TTCTAATGCAAAATATAACATGGGTAAGAAAAAGAAAAAGCCGTTCCTCAGTACGTAAGAGTGGCCACGAGACCTTCGTGAATTTGATATATACACAGTCGATAGTCTATATGTGCAT	NaN
MET31_89to118_30snps_1	Randomly_Mutated_Window	TTCTAATGCAAAATATAACATGGGTAAGAAAAAGAAAAAGCCGTTCCTCAGTACGTAAAGAGATTTGATCATTAACAAGTTGGGCTCAGGTGTTTTTAGGACGTCCGACGGACACACC	0.955668
MET31_89to118_30snps_2	Randomly_Mutated_Window	TTCTAATGCAAAATATAACATGGGTAAGAAAAAGAAAAAGCCGTTCCTCAGTACGTAAAGAGATTTGATCATTAACAAGTTGGGCTCATCGCCGTGCAAGTCCCTGGCGACGAAAAGA	3.25284
ATG5_1to28_30snps_1	Randomly_Mutated_Window	GACAGGCAACGATGTGGGAACGGCGTCTTAAATAATGAAGTAGCATGCTCAGAAGTGCGAATGAATTTTTGTTCTTTTGGTTCTAGAAGAACGGAGATAGGAAACCTATGATGTAAGT	NaN
ATG5_1to28_30snps_2	Randomly_Mutated_Window	GTGGGCGACGCGTATTGGAGGGAATTCGTAAATAATGAAGTAGCATGCTCAGAAGTGCGAATGAATTTTTGTTCTTTTGGTTCTAGAAGAACGGAGATAGGAAACCTATGATGTAAGT	NaN
ATG5_29to58_30snps_1	Randomly_Mutated_Window	AGATAAATTATCATCACCTTTTTTACACGTCCCGCAAGTAGTTTTCTACGGCTCAGCAGAATGAATTTTTGTTCTTTTGGTTCTAGAAGAACGGAGATAGGAAACCTATGATGTAAGT	NaN
ATG5_29to58_30snps_2	Randomly_Mutated_Window	AGATAAATTATCATCACCTTTTTTACACGTCCCCCATTTTGTAGGGTAAAGAGGTGAAGAATGAATTTTTGTTCTTTTGGTTCTAGAAGAACGGAGATAGGAAACCTATGATGTAAGT	NaN
ATG5_59to88_30snps_1	Randomly_Mutated_Window	AGATAAATTATCATCACCTTTTTTACACTAAATAATGAAGTAGCATGCTCAGAAGTGCAGTCATGAAGGAAAATGCACAACGTCCTGTGAACGGAGATAGGAAACCTATGATGTAAGT	NaN
ATG5_59to88_30snps_2	Randomly_Mutated_Window	AGATAAATTATCATCACCTTTTTTACACTAAATAATGAAGTAGCATGCTCAGAAGTGCTTCATGTCACGAACAGCCCATTGGACTAGTGAACGGAGATAGGAAACCTATGATGTAAGT	NaN
ATG5_89to118_30snps_1	Randomly_Mutated_Window	AGATAAATTATCATCACCTTTTTTACACTAAATAATGAAGTAGCATGCTCAGAAGTGCGAATGAATTTTTGTTCTTTTGGTTCTAGAACTTGCTTCGAGCATCCAACCGTCGTCGGAG	4.12185
ATG5_89to118_30snps_2	Randomly_Mutated_Window	AGATAAATTATCATCACCTTTTTTACACTAAATAATGAAGTAGCATGCTCAGAAGTGCGAATGAATTTTTGTTCTTTTGGTTCTAGAATCGTTTGACATCATGTTAGTAATCCACCCA	NaN
HUT1_1to28_30snps_1	Randomly_Mutated_Window	ATGGGGCCCCTAACCCCACTGCAGGTATATCGAACATGAAAAAATGACAGCAATGTAATTAGAACCAGAATTACAACGTAACAAGAAGAAGTAAACAAGGCAGTATTCGTATATTTGT	7.518
HUT1_1to28_30snps_2	Randomly_Mutated_Window	ATGAATCCTCTAAGCAGCACGCTGCGGTATCGAACATGAAAAAATGACAGCAATGTAATTAGAACCAGAATTACAACGTAACAAGAAGAAGTAAACAAGGCAGTATTCGTATATTTGT	5.59917
HUT1_29to58_30snps_1	Randomly_Mutated_Window	CGCTTCTAAAGGTTGTTTTGTAGATCCCCGTTGTACCATCCCCGATTATAATGGCACGTTAGAACCAGAATTACAACGTAACAAGAAGAAGTAAACAAGGCAGTATTCGTATATTTGT	NaN
HUT1_29to58_30snps_2	Randomly_Mutated_Window	CGCTTCTAAAGGTTGTTTTGTAGATCCCCCGAGGACGATGCTGCCTTATCATTAAAGGTTAGAACCAGAATTACAACGTAACAAGAAGAAGTAAACAAGGCAGTATTCGTATATTTGT	5.38156
HUT1_59to88_30snps_1	Randomly_Mutated_Window	CGCTTCTAAAGGTTGTTTTGTAGATCCCATCGAACATGAAAAAATGACAGCAATGTAAGATTGCTACCGTACTGCTTTGTGGGCAGTTAAGTAAACAAGGCAGTATTCGTATATTTGT	4.04011
HUT1_59to88_30snps_2	Randomly_Mutated_Window	CGCTTCTAAAGGTTGTTTTGTAGATCCCATCGAACATGAAAAAATGACAGCAATGTAAAAGCGTGTGAGGACCTCTGTGCCGGTATTTAAGTAAACAAGGCAGTATTCGTATATTTGT	3.62598
HUT1_89to118_30snps_1	Randomly_Mutated_Window	CGCTTCTAAAGGTTGTTTTGTAGATCCCATCGAACATGAAAAAATGACAGCAATGTAATTAGAACCAGAATTACAACGTAACAAGAAGGTTACTGTTCTCTGTCCACGACCGTGACAC	3.91565
HUT1_89to118_30snps_2	Randomly_Mutated_Window	CGCTTCTAAAGGTTGTTTTGTAGATCCCATCGAACATGAAAAAATGACAGCAATGTAATTAGAACCAGAATTACAACGTAACAAGAAGCTAATTGTCGCATCTAGCGGCGCCTCCCAG	1.61743
YPR199C_1to28_30snps_1	Randomly_Mutated_Window	GTACGCGGGGAAGAGTGGGCAGTGTCGACATATTAGTATATAATTCTAGCATGCGGATGGTCTTTAAGGAGCGGCCGTTGAAAAAACATGTCAAAACGGAAGATAAGTGACCAAGATA	NaN
YPR199C_1to28_30snps_2	Randomly_Mutated_Window	TTGAGACGGCCCGGCGAGCCGTGGCGGACATATTAGTATATAATTCTAGCATGCGGATGGTCTTTAAGGAGCGGCCGTTGAAAAAACATGTCAAAACGGAAGATAAGTGACCAAGATA	5.10522
YPR199C_29to58_30snps_1	Randomly_Mutated_Window	AATTATAATATTCCTATCTTTACAAAATGTGGAATAATGCCTTGCTGGAAGATACAGGGGTCTTTAAGGAGCGGCCGTTGAAAAAACATGTCAAAACGGAAGATAAGTGACCAAGATA	NaN
YPR199C_29to58_30snps_2	Randomly_Mutated_Window	AATTATAATATTCCTATCTTTACAAAATGTGGCGCCCTGTACGCGTGCTGGAAATTTCGGTCTTTAAGGAGCGGCCGTTGAAAAAACATGTCAAAACGGAAGATAAGTGACCAAGATA	1.98985
YPR199C_59to88_30snps_1	Randomly_Mutated_Window	AATTATAATATTCCTATCTTTACAAAATCATATTAGTATATAATTCTAGCATGCGGATATGGGGATCACCTGTATAACATGGGGCCAGTGTCAAAACGGAAGATAAGTGACCAAGATA	3.06749
YPR199C_59to88_30snps_2	Randomly_Mutated_Window	AATTATAATATTCCTATCTTTACAAAATCATATTAGTATATAATTCTAGCATGCGGATTTCGAACTGCACCGCCGTTAGAGGGTCCACTGTCAAAACGGAAGATAAGTGACCAAGATA	4.8413
YPR199C_89to118_30snps_1	Randomly_Mutated_Window	AATTATAATATTCCTATCTTTACAAAATCATATTAGTATATAATTCTAGCATGCGGATGGTCTTTAAGGAGCGGCCGTTGAAAAAACACTATTTTGTCACGCTACGACCGGTCTTCGC	5.34967
YPR199C_89to118_30snps_2	Randomly_Mutated_Window	AATTATAATATTCCTATCTTTACAAAATCATATTAGTATATAATTCTAGCATGCGGATGGTCTTTAAGGAGCGGCCGTTGAAAAAACAAAGGGCGCTTACGATCTCACCCAATCATCG	NaN
ALD4_1to28_30snps_1	Randomly_Mutated_Window	AACCACCATGTCCGATAGCCACTAACTTCTCTCCTTTCCTCAAAAATTCTTGGGTGTTAGGATTAGAAGTATCTGGAAAACCAACCAAGAAAACTACAATAACAAAAATAAATAAAGC	7.28491
ALD4_1to28_30snps_2	Randomly_Mutated_Window	AATCCACCAGTCACTGGGCGCCCAGGACCTCTCCTTTCCTCAAAAATTCTTGGGTGTTAGGATTAGAAGTATCTGGAAAACCAACCAAGAAAACTACAATAACAAAAATAAATAAAGC	5.20719
ALD4_29to58_30snps_1	Randomly_Mutated_Window	GGGGGTTTGTCGGTGACAATTGACTTCAACGAAGGGATAGGGGCTCCATACCATCACCAGGATTAGAAGTATCTGGAAAACCAACCAAGAAAACTACAATAACAAAAATAAATAAAGC	NaN
ALD4_29to58_30snps_2	Randomly_Mutated_Window	GGGGGTTTGTCGGTGACAATTGACTTCAAAGGAGCCGAAGGGGCGTGGTAACCCGTGGAGGATTAGAAGTATCTGGAAAACCAACCAAGAAAACTACAATAACAAAAATAAATAAAGC	4.77895
ALD4_59to88_30snps_1	Randomly_Mutated_Window	GGGGGTTTGTCGGTGACAATTGACTTCACTCTCCTTTCCTCAAAAATTCTTGGGTGTTCATCACTTTTAACAGACTTGGGTGGGGAGCGAAAACTACAATAACAAAAATAAATAAAGC	4.36892
ALD4_59to88_30snps_2	Randomly_Mutated_Window	GGGGGTTTGTCGGTGACAATTGACTTCACTCTCCTTTCCTCAAAAATTCTTGGGTGTTCATTCCCCCTTCGGTGTTTCCGTATTAATTGAAAACTACAATAACAAAAATAAATAAAGC	4.39135
ALD4_89to118_30snps_1	Randomly_Mutated_Window	GGGGGTTTGTCGGTGACAATTGACTTCACTCTCCTTTCCTCAAAAATTCTTGGGTGTTAGGATTAGAAGTATCTGGAAAACCAACCAATCGTCGGTGTTACGACCCGCGCTGGTCTTT	1.34548
ALD4_89to118_30snps_2	Randomly_Mutated_Window	GGGGGTTTGTCGGTGACAATTGACTTCACTCTCCTTTCCTCAAAAATTCTTGGGTGTTAGGATTAGAAGTATCTGGAAAACCAACCAAATGCGTGCAGCCTGTGTCGGCGCGCTGGCG	NaN
QCR7_1to28_30snps_1	Randomly_Mutated_Window	TGCCCCATCCCCGGGGTTTTCTAGCGATTAAAAGCTTGGAAAAATAGCAGTAAAGGTTGTTGTTGGACAATTTATCAGAATATTAGTAACTGTAATTAAACGTTCCAGAAAGAACAAA	7.45904
QCR7_1to28_30snps_2	Randomly_Mutated_Window	CATAGTAGTGGCGCGGCCCTCCTGACGTTAAAAGCTTGGAAAAATAGCAGTAAAGGTTGTTGTTGGACAATTTATCAGAATATTAGTAACTGTAATTAAACGTTCCAGAAAGAACAAA	6.68149
QCR7_29to58_30snps_1	Randomly_Mutated_Window	ATAGAGCAGTAATAAAAGGGAAGAGATGCTGGGTGGGCCCGCTGGCCTGTGTTGCTGAGTTGTTGGACAATTTATCAGAATATTAGTAACTGTAATTAAACGTTCCAGAAAGAACAAA	NaN
QCR7_29to58_30snps_2	Randomly_Mutated_Window	ATAGAGCAGTAATAAAAGGGAAGAGATGGTGCTTGAGCTCGTCTACTTTCAGGGTCCCGTTGTTGGACAATTTATCAGAATATTAGTAACTGTAATTAAACGTTCCAGAAAGAACAAA	9.17864
QCR7_59to88_30snps_1	Randomly_Mutated_Window	ATAGAGCAGTAATAAAAGGGAAGAGATGTAAAAGCTTGGAAAAATAGCAGTAAAGGTTAACTCGTCGTGTCAAGAGCCGTACAATTGTACTGTAATTAAACGTTCCAGAAAGAACAAA	8.76258
QCR7_59to88_30snps_2	Randomly_Mutated_Window	ATAGAGCAGTAATAAAAGGGAAGAGATGTAAAAGCTTGGAAAAATAGCAGTAAAGGTTTAATACACGATGGGGCCGCACCGCCCTTACACTGTAATTAAACGTTCCAGAAAGAACAAA	2.83723
QCR7_89to118_30snps_1	Randomly_Mutated_Window	ATAGAGCAGTAATAAAAGGGAAGAGATGTAAAAGCTTGGAAAAATAGCAGTAAAGGTTGTTGTTGGACAATTTATCAGAATATTAGTATGCCCGGAGCTTTCCCGACACGCTCTTCTG	2.80995
QCR7_89to118_30snps_2	Randomly_Mutated_Window	ATAGAGCAGTAATAAAAGGGAAGAGATGTAAAAGCTTGGAAAAATAGCAGTAAAGGTTGTTGTTGGACAATTTATCAGAATATTAGTACGGAAGCCGCCTGTGATACCCCGTGGTTCT	7.90905
SDH2_1to28_30snps_1	Randomly_Mutated_Window	TGTCCCGAGCCGTTTAGAGCGCCTAGGAGCCAAAAAATGTTAGGCTAAAGGAAGGGATTGAAAGGAATATAGTTGAGCTATACTTTCTTGAAATACTGGAGTATACATATTTATAGGG	3.45878
SDH2_1to28_30snps_2	Randomly_Mutated_Window	GTTAACGGGTGCATGCGCGACCATATCGGCCAAAAAATGTTAGGCTAAAGGAAGGGATTGAAAGGAATATAGTTGAGCTATACTTTCTTGAAATACTGGAGTATACATATTTATAGGG	3.67041
SDH2_29to58_30snps_1	Randomly_Mutated_Window	AAGGGGATTAATGACTTTCTATGAGAATTGTTTCTTTGAGATATAGCTCTCGCTTTTATGAAAGGAATATAGTTGAGCTATACTTTCTTGAAATACTGGAGTATACATATTTATAGGG	5.17643
SDH2_29to58_30snps_2	Randomly_Mutated_Window	AAGGGGATTAATGACTTTCTATGAGAATCGGCCGCGCACCATTTGCGTCCTTTTACCGTGAAAGGAATATAGTTGAGCTATACTTTCTTGAAATACTGGAGTATACATATTTATAGGG	1.68552
SDH2_59to88_30snps_1	Randomly_Mutated_Window	AAGGGGATTAATGACTTTCTATGAGAATGCCAAAAAATGTTAGGCTAAAGGAAGGGATCTGTCTTCCATGCACCAGCGGGACTGCAACTGAAATACTGGAGTATACATATTTATAGGG	3.79594
SDH2_59to88_30snps_2	Randomly_Mutated_Window	AAGGGGATTAATGACTTTCTATGAGAATGCCAAAAAATGTTAGGCTAAAGGAAGGGATCTGTCTTGTATGCCAAAGCAAGACTGGCTATGAAATACTGGAGTATACATATTTATAGGG	2.82869
SDH2_89to118_30snps_1	Randomly_Mutated_Window	AAGGGGATTAATGACTTTCTATGAGAATGCCAAAAAATGTTAGGCTAAAGGAAGGGATTGAAAGGAATATAGTTGAGCTATACTTTCTCCGCTAGAGTCGCACATTCGGGGCTGCCCT	3.69932
SDH2_89to118_30snps_2	Randomly_Mutated_Window	AAGGGGATTAATGACTTTCTATGAGAATGCCAAAAAATGTTAGGCTAAAGGAAGGGATTGAAAGGAATATAGTTGAGCTATACTTTCTCTCGCGGTCATTTCGGCACACACGCCCATA	4.46623
GLK1_1to28_30snps_1	Randomly_Mutated_Window	CAGCGTTTAATGGCATAGCTAGAGTCAGATCAACAGAACCCCCAACCCCCCCATCAGTGCCCAACTCAGCTTCCGTAAACCACAACACCACCACTAATACAACTCTATCATACACAAG	1.67893
GLK1_1to28_30snps_2	Randomly_Mutated_Window	GCCTCCAATTATGCGCCGTGGCCATAGAATCAACAGAACCCCCAACCCCCCCATCAGTGCCCAACTCAGCTTCCGTAAACCACAACACCACCACTAATACAACTCTATCATACACAAG	1.31111
GLK1_29to58_30snps_1	Randomly_Mutated_Window	TGAAAACGCGCCCATATAAATATCCGCTTCAGTATACCAAAATGCTAGATATTAGGCCGCCCAACTCAGCTTCCGTAAACCACAACACCACCACTAATACAACTCTATCATACACAAG	8.99662
GLK1_29to58_30snps_2	Randomly_Mutated_Window	TGAAAACGCGCCCATATAAATATCCGCTCGATCTCCCCAGTGGCGTTTAATGCAATTGGCCCAACTCAGCTTCCGTAAACCACAACACCACCACTAATACAACTCTATCATACACAAG	9.71429
GLK1_59to88_30snps_1	Randomly_Mutated_Window	TGAAAACGCGCCCATATAAATATCCGCTATCAACAGAACCCCCAACCCCCCCATCAGTCAGACTGCTTATCCGGAACGGTTCGTCAGACACCACTAATACAACTCTATCATACACAAG	12.7056
GLK1_59to88_30snps_2	Randomly_Mutated_Window	TGAAAACGCGCCCATATAAATATCCGCTATCAACAGAACCCCCAACCCCCCCATCAGTTTTTTCTCTCATCCGGCCCTCAGGTTTTTGCACCACTAATACAACTCTATCATACACAAG	13.0817
GLK1_89to118_30snps_1	Randomly_Mutated_Window	TGAAAACGCGCCCATATAAATATCCGCTATCAACAGAACCCCCAACCCCCCCATCAGTGCCCAACTCAGCTTCCGTAAACCACAACACGCGTCAATCGTTGCGGTACCGCCTAGGTTC	8.96343
GLK1_89to118_30snps_2	Randomly_Mutated_Window	TGAAAACGCGCCCATATAAATATCCGCTATCAACAGAACCCCCAACCCCCCCATCAGTGCCCAACTCAGCTTCCGTAAACCACAACACACTACGAGTCCGTCTAACGCGTACGGTCCC	9.34052
TIM11_1to28_30snps_1	Randomly_Mutated_Window	AGAGGGCTAACGCGTTCGCGAGACCGCCTTTTTTGACTTTTCACACAGAAATTTTAGATAAAAGGAAGTATTATATCGGAACATAACGTATATAGGAACTAGCTGAGTGAGTTAAAGG	6.04925
TIM11_1to28_30snps_2	Randomly_Mutated_Window	GTGCCGCCTAGCCCCCGGAGAAGGACAGTTTTTTGACTTTTCACACAGAAATTTTAGATAAAAGGAAGTATTATATCGGAACATAACGTATATAGGAACTAGCTGAGTGAGTTAAAGG	5.47899
TIM11_29to58_30snps_1	Randomly_Mutated_Window	TATTTAAGGGTATAAATTTTTCTTTAGTACGGACCTGCACGGGTCTTTTTGAACACTCTAAAAGGAAGTATTATATCGGAACATAACGTATATAGGAACTAGCTGAGTGAGTTAAAGG	11.5949
TIM11_29to58_30snps_2	Randomly_Mutated_Window	TATTTAAGGGTATAAATTTTTCTTTAGTGGCCACCTAGGAATTATGTCGGCGGCCGTGTAAAAGGAAGTATTATATCGGAACATAACGTATATAGGAACTAGCTGAGTGAGTTAAAGG	10.2048
TIM11_59to88_30snps_1	Randomly_Mutated_Window	TATTTAAGGGTATAAATTTTTCTTTAGTTTTTTTGACTTTTCACACAGAAATTTTAGAAGGGGTTTGTGTACCCTCATTTGGTACTTTTATATAGGAACTAGCTGAGTGAGTTAAAGG	13.0373
TIM11_59to88_30snps_2	Randomly_Mutated_Window	TATTTAAGGGTATAAATTTTTCTTTAGTTTTTTTGACTTTTCACACAGAAATTTTAGACTGCGCCTGCCCGATCGAAAACCACATCGATATATAGGAACTAGCTGAGTGAGTTAAAGG	NaN
TIM11_89to118_30snps_1	Randomly_Mutated_Window	TATTTAAGGGTATAAATTTTTCTTTAGTTTTTTTGACTTTTCACACAGAAATTTTAGATAAAAGGAAGTATTATATCGGAACATAACGAGAGGCATCTTAGCTACTCGTGACGCTCAT	13.5559
TIM11_89to118_30snps_2	Randomly_Mutated_Window	TATTTAAGGGTATAAATTTTTCTTTAGTTTTTTTGACTTTTCACACAGAAATTTTAGATAAAAGGAAGTATTATATCGGAACATAACGCTGGCCCAGTAATAGGTCAGACCCGCGCCA	NaN
ATP19_1to28_30snps_1	Randomly_Mutated_Window	CGGCTTCCTATTCATCTGTTCGTTAGAATTTTTAGGAGCAAGTCCCCCCATAGAGCACATAACTCGTTAGCATTGAATAAGGCCAGGTGACTTCAAATAATAATTTATAACTACGACA	6.0968
[truncated: 5,538 more rows]

## Sheet: Supp. Table 2
For each of the 5464 YFP-barcoded core promoter variants, the table below details the raw read counts for each position within the [-100,-1] region (positions relative to the end of the 118bp long core promoter variant):
Name	-1	-2	-3	-4	-5	-6	-7	-8	-9	-10	-11	-12	-13	-14	-15	-16	-17	-18	-19	-20	-21	-22	-23	-24	-25	-26	-27	-28	-29	-30	-31	-32	-33	-34	-35	-36	-37	-38	-39	-40	-41	-42	-43	-44	-45	-46	-47	-48	-49
snR14	0	0	0	0	0	0	0	0	0	0	0	0	0	0	0	0	18	0	0	0	0	0	0	0	0	0	0	0	0	0	0	0	0	0	0	0	0	0	0	0	0	0	0	0	0	0	0	0	0
TDH3	0	0	0	0	0	0	0	0	0	0	0	0	0	0	0	0	0	0	0	0	0	0	0	0	0	0	0	0	0	0	0	0	0	0	0	0	0	0	0	0	0	0	0	0	0	0	0	0	0
GAL7	0	0	0	0	0	0	0	0	0	0	0	0	0	0	0	10	17	0	0	0	0	0	0	0	0	0	0	0	0	19	0	18	0	0	0	0	0	0	0	0	0	0	0	0	0	0	0	0	0
CCW12	0	0	0	0	0	0	12	0	0	0	0	0	0	0	0	0	0	0	0	0	0	0	0	0	0	0	0	0	0	0	0	0	0	0	0	20	0	0	0	0	0	0	24	0	0	24	0	0	0
ENO2	0	0	0	0	0	0	0	0	0	0	0	0	0	0	0	0	0	0	0	0	0	0	0	0	0	0	0	0	0	7	0	0	0	0	0	0	0	0	0	0	0	0	0	0	0	0	0	0	0
PDC1	0	0	13	0	0	0	17	0	0	0	0	6	0	0	0	0	0	56	0	0	13	0	22	0	0	0	7	0	0	190	0	0	0	0	0	13	0	0	0	0	0	0	0	0	0	0	0	0	0
FBA1	0	0	0	0	0	0	0	0	15	0	0	0	11	0	0	0	0	22	0	0	0	0	0	46	0	0	0	0	0	0	0	0	0	0	0	0	0	0	0	0	0	0	0	0	0	0	0	0	0
TEF1	0	0	0	0	0	0	0	0	0	0	0	0	0	0	0	0	0	0	0	17	9	0	0	0	0	0	0	0	0	0	145	0	0	0	0	5	0	0	0	0	0	0	0	0	0	0	0	0	0
ADH1	0	0	0	0	0	0	0	0	0	0	0	0	0	0	0	19	0	0	0	16	0	7	0	31	0	0	21	127	0	0	0	0	0	0	0	0	0	175	0	0	0	0	0	0	0	0	0	0	0
CWP2	0	0	0	0	0	0	0	0	0	0	0	0	0	0	0	0	0	0	0	0	0	0	0	0	0	0	0	0	0	0	0	0	0	0	0	0	0	0	0	0	0	0	0	0	0	0	0	0	0
HSP12	0	0	0	0	0	0	0	0	0	0	0	0	0	0	0	0	0	0	0	0	0	0	0	0	0	0	0	0	0	0	0	0	0	0	0	0	0	0	0	0	0	0	0	0	0	0	0	0	0
PGK1	0	0	0	0	0	0	0	0	0	0	0	0	0	0	0	0	0	0	0	0	0	0	0	0	0	0	0	25	0	0	0	17	0	0	0	0	0	0	0	22	0	0	9	0	0	0	0	0	0
RPL3	0	0	0	0	0	0	0	33	0	0	0	0	9	0	0	0	0	0	0	11	0	47	0	10	67	0	0	15	0	14	0	0	0	0	0	49	0	0	0	0	0	0	0	0	0	0	0	0	0
TDH2	0	0	12	0	0	0	0	7	0	0	0	0	0	0	0	0	0	0	0	0	0	0	0	0	0	0	0	0	0	0	0	0	0	0	0	0	0	0	0	0	0	0	0	0	0	0	0	24	0
RPL8A	0	0	0	23	0	0	21	5	11	0	0	91	16	0	7	0	0	0	0	19	0	0	0	0	0	0	0	0	0	0	0	0	8	0	0	0	0	0	0	0	0	0	0	0	0	0	0	0	0
CDC19	0	0	0	0	0	0	0	0	0	0	0	0	0	0	0	0	0	0	0	0	0	0	0	0	0	0	0	0	0	0	0	0	0	0	0	0	0	0	0	0	0	0	0	0	0	0	0	0	0
RPS14B	0	0	0	0	0	0	0	0	0	0	0	0	0	39	0	0	0	0	0	0	37	0	0	46	0	0	0	11	18	20	0	0	0	0	0	0	0	0	0	0	0	0	0	0	0	0	0	0	0
RPL10	0	0	0	0	0	0	0	0	0	0	0	7	0	0	0	0	0	0	0	0	43	0	0	5	0	0	0	0	0	0	0	0	0	0	0	0	0	10	0	0	0	0	0	0	0	0	0	0	0
RPL28	0	0	0	7	0	0	0	0	0	0	0	19	0	0	0	87	0	0	13	32	0	0	0	0	41	0	0	0	0	0	0	22	0	0	0	0	0	0	0	0	0	0	0	0	0	0	0	0	0
LYS20	0	0	0	0	0	0	0	0	0	0	0	0	0	0	0	0	21	0	0	0	0	0	0	0	0	0	0	0	0	0	0	0	25	8	0	0	0	22	0	0	0	0	0	0	0	0	0	0	0
RPP0	0	0	20	0	0	0	0	0	28	0	0	15	0	37	0	0	0	0	0	23	0	16	0	0	31	0	0	0	0	0	0	0	15	0	0	18	0	0	0	0	0	0	0	0	0	0	0	0	0
RPL7B	0	0	0	0	0	0	0	0	0	0	0	0	0	0	0	0	0	0	0	0	0	0	0	0	6	0	32	0	0	0	0	0	22	0	0	0	23	0	0	0	0	0	0	0	0	0	0	0	0
RPL4A	0	0	0	0	0	17	10	0	0	38	0	0	0	11	9	289	0	7	0	0	6	0	31	139	0	0	0	0	0	0	0	0	0	0	0	0	0	0	0	0	0	0	0	0	0	0	0	0	0
HHF2	0	0	0	0	0	0	0	0	0	0	0	0	0	0	0	0	0	0	0	0	5	0	0	0	0	0	0	0	0	0	0	0	20	0	0	0	0	0	0	0	0	0	0	0	0	0	0	0	0
RPL15A	0	0	29	0	0	0	0	0	21	0	0	0	0	0	0	0	13	10	0	33	0	0	291	0	0	0	0	0	18	0	16	10	0	0	0	0	0	0	19	0	13	0	0	0	0	0	0	0	0
RPL25	0	0	0	0	0	0	0	0	0	0	0	0	0	0	0	0	0	0	0	0	0	0	0	0	0	0	0	0	0	0	0	0	0	0	0	0	0	0	0	0	0	0	0	0	0	0	0	0	0
HXT1	0	0	0	0	0	0	0	0	0	0	0	0	0	0	0	0	0	0	0	0	0	0	37	0	0	15	0	0	0	0	0	86	0	0	107	0	0	0	0	0	37	0	16	18	0	0	7	0	0
RPS13	0	0	13	0	0	0	22	0	0	0	0	0	0	50	0	0	115	0	16	0	176	0	0	0	0	0	0	0	67	0	0	0	155	0	0	0	0	0	0	0	0	0	0	0	0	0	0	0	0
RPL26A	0	0	0	0	0	0	0	0	0	0	0	0	0	0	0	0	13	0	0	0	8	0	5	0	0	0	0	0	0	0	0	0	0	0	0	0	0	0	0	0	0	0	0	0	0	0	0	0	0
ALD6	0	0	0	0	0	0	0	9	0	0	0	0	0	0	0	0	0	0	0	0	0	0	0	0	0	0	0	0	0	0	0	0	0	0	0	0	0	0	0	0	0	0	0	16	0	0	55	0	0
HHT2	0	0	8	0	0	0	0	35	0	0	0	30	0	0	10	374	0	0	16	0	0	0	0	0	0	0	0	8	0	0	0	0	0	0	0	0	0	0	0	0	0	33	0	0	0	12	0	0	0
HHT1	0	0	0	0	0	0	0	0	0	0	0	0	0	0	0	0	0	0	0	0	0	0	0	20	0	0	21	42	0	0	0	0	0	0	0	0	0	0	0	0	0	0	0	0	0	0	0	0	0
ADH2	0	0	0	0	0	0	0	0	0	0	0	19	0	0	0	0	0	0	0	0	0	0	0	0	0	0	0	0	21	0	0	0	12	0	0	0	0	0	0	0	0	0	0	0	0	0	0	0	0
RPS20	0	0	0	0	0	0	0	0	0	0	0	0	0	0	0	0	0	0	0	0	0	0	0	0	0	0	0	0	0	0	0	0	0	0	0	0	0	0	0	0	0	0	0	0	0	0	0	0	0
RPS3	0	0	0	0	0	0	0	22	0	0	36	0	13	0	26	0	0	75	0	0	0	0	37	0	0	0	0	0	0	0	0	0	6	0	0	0	0	0	0	0	0	0	0	0	0	0	0	0	0
RPL41B	0	0	0	0	0	0	0	0	0	0	0	0	0	0	0	0	0	74	0	0	0	0	0	0	0	0	0	0	0	0	0	0	0	0	0	0	0	0	0	0	0	0	0	0	0	0	0	0	0
EFB1	0	0	0	0	0	0	0	0	0	0	0	0	0	0	0	0	5	0	0	13	80	0	0	0	0	0	0	0	0	0	0	0	9	0	0	20	0	0	0	0	0	0	0	0	0	0	0	0	0
RPL39	0	0	0	0	0	0	0	0	0	0	0	0	0	0	0	0	0	0	0	0	0	9	0	0	0	20	0	0	0	0	0	0	0	0	0	0	0	0	0	0	0	0	0	0	0	0	0	0	0
PSA1	0	0	0	0	0	0	13	0	0	0	0	0	0	0	0	0	0	0	0	0	0	6	0	0	0	0	0	0	0	0	0	0	9	0	0	0	0	0	0	0	0	0	0	0	0	0	0	0	0
CIT2	0	0	0	0	0	0	0	0	0	50	0	0	0	0	19	0	0	0	0	0	0	0	0	0	0	0	0	0	0	0	0	0	18	0	0	0	11	0	36	10	0	0	0	0	0	0	0	0	0
RPL18A	0	0	0	0	0	0	0	0	0	0	0	0	0	0	0	0	0	0	0	9	0	0	0	0	0	0	0	0	0	0	0	0	0	0	0	0	0	0	0	0	0	0	0	0	0	0	0	0	0
RPS0A	0	0	0	0	0	0	0	0	19	0	0	0	0	0	0	0	0	0	108	0	0	78	0	18	10	0	0	0	5	0	0	0	0	0	0	0	0	0	0	0	0	0	0	0	0	0	0	0	0
RPL30	0	0	0	0	0	0	0	0	0	11	0	0	5	0	0	0	0	0	0	0	0	0	0	0	0	0	0	0	0	0	0	0	0	0	0	0	0	0	0	0	0	0	0	0	0	0	0	0	0
HHF1	0	0	0	0	0	0	0	0	0	0	0	0	0	0	0	0	0	0	0	0	0	0	0	0	0	0	0	0	0	0	0	0	0	19	0	0	0	0	28	0	0	0	0	0	0	0	0	0	0
RPP1B	0	0	0	0	0	0	0	0	9	13	0	0	26	0	0	6	41	0	0	56	15	0	0	0	10	0	0	29	0	0	0	0	0	0	0	0	0	0	0	8	0	0	0	12	0	0	0	0	0
RPS5	0	0	0	0	0	0	0	0	0	0	0	0	0	0	0	0	0	0	0	0	0	0	0	0	0	0	0	0	0	0	0	0	0	0	0	50	0	0	0	0	0	0	0	0	0	0	0	0	0
RPL22A	0	0	0	0	0	0	0	0	0	0	0	0	0	0	0	0	0	0	0	0	0	0	0	0	0	0	0	0	0	0	0	0	0	0	0	0	0	0	0	0	0	0	0	0	0	0	0	0	0
RPS4A	0	0	0	0	0	0	0	0	0	18	0	0	0	0	0	0	0	0	0	0	0	24	0	0	0	21	0	0	0	0	0	0	0	0	0	0	0	0	0	0	0	0	0	0	0	0	0	0	0
RPL13B	0	0	0	0	7	0	0	0	0	0	11	0	0	0	24	0	0	0	0	0	0	0	0	0	0	0	0	0	0	0	0	0	0	0	0	0	0	0	0	0	0	0	0	0	0	0	0	0	0
RPL7A	0	0	0	0	0	0	0	0	0	0	0	0	0	0	0	0	0	0	0	0	0	0	0	0	0	0	0	0	0	0	0	0	0	0	0	0	0	0	0	0	0	0	0	0	0	0	0	0	0
RPL5	0	0	0	0	0	0	0	0	0	0	0	0	0	0	0	0	0	0	23	0	0	0	0	0	0	0	0	0	0	0	0	0	0	0	0	0	0	0	0	0	0	0	0	0	0	0	0	0	0
RPS15	0	0	0	0	0	0	0	0	12	0	0	0	8	0	0	0	0	0	0	0	0	6	0	0	0	66	0	5	0	0	0	37	0	0	0	14	89	0	0	0	0	8	0	0	0	0	0	0	0
RPL33A	0	0	0	0	0	0	0	0	0	0	0	0	0	0	0	0	0	0	0	0	0	0	0	0	0	0	0	0	0	0	0	0	0	0	0	0	0	0	0	0	0	0	0	0	0	0	0	0	0
RPL14A	0	0	0	0	0	0	0	0	0	0	0	0	0	0	0	0	0	0	42	0	0	0	0	0	0	0	0	0	0	0	0	0	0	0	0	0	0	0	0	0	0	0	0	0	0	0	0	0	0
RPS21B	0	0	0	0	0	0	0	0	0	0	0	0	0	0	0	0	0	0	0	0	0	0	0	0	0	0	0	0	0	0	0	0	0	0	0	0	0	0	0	0	0	0	0	0	0	0	0	0	0
RPL38	0	0	0	0	0	0	0	0	0	0	0	0	5	0	0	0	0	0	0	0	0	0	0	0	0	7	0	0	0	0	0	0	0	0	0	0	0	0	0	0	0	0	0	0	0	0	0	0	0
RPL27A	0	0	0	0	0	0	0	0	0	0	0	0	0	0	0	0	0	0	0	0	0	0	0	0	0	0	0	0	0	0	0	0	0	0	0	0	0	0	0	0	0	0	0	0	0	0	0	0	0
RPS30A	0	0	0	0	0	0	0	0	0	0	0	0	0	0	0	0	0	0	29	0	0	0	0	0	0	0	0	0	0	0	0	0	0	0	0	0	0	0	0	0	0	0	0	0	0	0	0	0	0
RPS23B	0	0	0	0	0	0	0	0	0	0	0	0	0	0	0	0	15	23	0	37	0	0	0	131	0	0	0	7	0	0	0	0	0	0	0	0	0	0	0	0	7	0	0	0	0	0	0	0	0
EFT2	0	0	0	0	0	0	0	0	0	0	0	0	0	0	0	0	0	0	0	0	0	0	0	0	0	0	14	0	0	0	0	0	0	0	0	18	0	0	0	0	0	0	0	0	0	0	0	0	0
RPL31A	0	0	0	0	0	0	0	0	0	0	0	0	0	0	0	0	0	0	0	31	0	0	0	0	0	0	0	12	0	0	0	0	0	0	0	0	0	0	0	0	0	0	0	0	0	0	0	0	0
ICL1	0	0	0	0	0	0	7	0	0	0	0	0	0	0	0	0	0	0	0	0	17	0	0	0	0	16	0	0	13	0	0	0	0	0	0	0	0	0	0	0	0	0	5	0	0	0	0	0	0
RPL11B	0	0	0	0	0	0	0	0	0	0	28	0	0	0	0	0	20	0	14	0	26	21	14	0	0	43	0	0	0	0	0	0	0	30	0	0	0	0	0	0	0	0	0	0	0	0	0	0	0
RPL43B	0	0	0	0	10	0	0	0	0	19	0	0	0	8	0	0	0	0	0	35	0	0	0	0	0	0	0	0	6	0	0	39	0	0	0	0	0	0	0	0	0	0	0	0	0	0	0	0	0
RPS16A	0	0	0	0	0	0	0	0	0	0	0	0	0	0	0	0	10	0	0	0	0	0	0	0	0	0	0	0	0	0	0	0	0	0	0	0	0	0	0	0	0	0	0	0	0	0	0	0	0
RPL33B	0	0	0	0	0	0	0	0	23	0	8	0	0	0	0	6	0	22	5	0	0	0	0	0	0	0	0	0	0	15	0	0	0	0	0	0	0	0	0	0	0	0	0	0	0	0	0	0	0
RPS1A	0	0	0	0	0	0	0	0	0	0	0	0	0	0	0	0	0	0	0	0	0	0	0	0	0	0	0	0	0	0	0	0	0	0	0	0	0	0	0	0	0	0	0	0	0	0	0	0	0
RPL23B	0	0	0	0	0	0	0	0	0	0	0	0	0	0	0	0	0	0	0	0	0	0	0	0	0	0	0	0	0	0	0	0	0	0	0	0	0	0	0	0	0	0	0	0	0	0	0	0	0
RPL17A	0	0	0	0	0	0	12	0	0	0	0	0	0	0	0	0	0	0	0	0	105	0	0	7	0	17	0	0	0	0	0	23	0	0	0	21	0	0	15	0	0	0	0	0	0	0	0	12	0
RPP2A	0	0	0	0	0	0	0	0	0	0	0	0	0	0	0	0	0	0	0	0	0	0	0	0	0	0	0	0	0	0	0	0	0	0	0	0	0	0	0	0	0	0	0	0	0	0	0	0	0
ARO4	0	0	0	0	0	0	34	0	0	0	0	0	0	0	0	0	0	0	0	0	14	0	0	0	0	0	0	0	0	0	0	0	0	0	0	0	20	0	0	0	0	0	0	0	0	0	0	0	0
HAC1	0	0	0	0	0	0	0	0	0	0	0	0	21	0	0	0	0	0	0	0	0	0	0	0	0	0	0	0	0	0	0	0	0	0	0	0	0	0	0	0	0	0	0	0	0	0	0	0	0
ARF1	0	0	0	0	0	19	0	0	0	0	0	0	0	0	0	0	0	0	0	0	0	0	171	0	14	0	35	16	0	0	19	0	0	40	10	0	23	0	0	0	0	0	0	0	0	0	0	0	0
ILV3	0	0	0	0	0	0	0	0	0	0	0	0	0	0	120	0	20	0	0	0	0	32	16	0	16	0	0	0	0	0	0	0	0	0	0	0	0	0	0	0	0	0	0	0	0	0	0	0	0
PFK2	0	0	0	0	0	0	0	0	0	0	0	0	0	0	0	0	0	11	0	0	0	0	0	0	0	0	0	0	0	0	0	0	0	0	0	0	0	0	0	0	0	0	0	0	0	0	0	0	0
RPL4B	0	0	0	0	0	0	0	0	0	0	0	0	0	0	0	0	0	0	0	0	0	0	0	0	0	0	0	0	0	0	0	0	0	0	0	0	0	0	0	0	0	0	0	0	0	0	0	0	0
SUP45	0	0	0	0	0	0	0	0	0	0	0	0	0	0	0	0	0	0	0	0	0	0	0	0	0	0	0	0	0	0	0	0	0	0	0	0	0	0	0	0	0	0	0	0	0	0	0	0	0
BGL2	0	0	0	0	0	0	0	0	0	0	0	0	0	0	0	0	0	0	0	0	0	0	0	0	0	0	0	0	0	0	0	0	0	0	0	0	0	0	0	0	0	0	0	0	0	0	0	0	0
ATP7	0	0	0	0	0	0	0	0	0	0	0	0	0	0	0	0	0	0	0	0	0	0	0	0	0	0	0	0	0	0	0	0	0	0	0	0	0	0	0	0	0	0	0	0	0	0	0	0	0
ADE13	0	0	0	0	0	0	0	0	0	0	0	0	0	0	0	0	0	0	0	0	0	0	0	0	0	0	0	0	0	0	0	12	0	0	0	0	0	0	0	0	0	48	0	0	0	0	0	0	0
ISU1	0	0	0	0	0	0	0	0	0	0	0	0	0	0	0	0	0	0	0	0	0	0	0	0	0	0	0	0	0	0	0	0	0	0	0	0	0	0	0	0	0	0	0	0	0	0	0	0	0
YMR226C	0	0	0	0	0	0	0	0	0	0	0	0	0	0	0	0	0	0	0	10	0	0	0	15	36	0	0	0	7	0	0	0	0	0	0	0	0	0	0	0	17	0	0	0	0	0	0	0	7
COX12	0	0	0	0	0	0	0	0	30	0	0	0	0	0	12	0	0	0	17	10	0	0	0	0	0	65	0	0	0	0	0	0	0	0	0	0	0	0	0	0	0	0	0	0	0	0	0	0	0
PFY1	0	0	0	0	0	0	0	0	0	0	0	0	0	0	0	0	0	0	0	0	0	0	0	0	15	0	0	0	0	0	0	0	0	0	0	0	0	0	0	0	0	0	0	0	0	0	0	0	0
DLD3	0	0	0	0	0	0	0	0	0	0	11	0	19	0	0	0	0	0	9	0	0	27	0	0	0	0	0	0	22	0	0	0	0	0	0	20	0	0	0	0	0	0	0	6	0	0	0	0	0
GRE3	0	0	0	0	0	0	0	0	0	0	0	0	0	0	0	0	0	0	0	0	0	0	0	0	0	0	0	0	0	0	0	0	0	0	0	0	0	23	0	0	0	0	0	0	6	0	0	0	0
KGD2	0	0	0	0	0	0	0	0	0	0	0	0	0	0	0	0	0	0	0	0	0	0	0	0	0	0	0	0	0	0	0	0	0	0	8	0	0	0	0	0	0	0	0	0	0	0	0	0	0
ATP17	0	0	0	0	0	0	0	0	0	0	0	0	0	0	0	0	0	0	0	0	0	0	0	0	0	0	0	0	0	0	0	0	0	0	0	0	0	0	0	0	0	0	0	0	0	0	0	0	0
PRE2	0	0	0	15	0	0	0	0	0	0	0	0	0	10	0	0	0	0	0	0	0	0	0	0	0	0	0	0	0	0	0	0	0	0	0	0	0	0	0	0	0	0	0	0	0	0	0	0	0
COX7	0	0	0	0	0	0	0	0	0	0	0	0	0	0	0	0	0	0	0	0	0	0	0	0	0	0	0	0	0	0	0	0	0	0	0	0	19	0	0	0	0	23	0	0	0	0	17	0	0
RPL9B	0	0	0	0	0	0	0	0	0	0	0	0	0	6	0	0	0	0	0	0	0	0	0	0	0	0	0	36	0	0	39	0	40	0	9	17	0	0	12	0	0	0	0	0	0	0	0	0	0
MRS11	0	0	0	0	0	0	0	0	0	0	0	0	0	0	0	0	5	0	0	0	0	0	0	0	0	0	0	0	0	0	0	0	0	25	0	8	0	0	0	17	0	0	0	0	19	0	0	0	0
ATP14	0	0	0	0	0	0	0	0	0	0	0	0	0	0	0	0	0	0	0	0	0	0	0	0	0	0	0	0	0	0	0	0	0	0	0	0	14	0	33	0	0	0	0	11	0	0	24	0	0
COX13	0	0	0	0	0	0	0	0	0	0	0	0	11	0	0	0	0	0	0	0	0	0	0	0	0	0	0	44	0	5	0	0	0	0	0	19	10	0	22	0	0	0	0	19	0	0	0	0	0
ATP4	0	0	0	0	0	0	0	0	0	0	0	0	0	0	0	0	0	0	0	0	0	0	0	0	14	0	0	0	0	0	0	0	0	0	0	21	0	0	20	0	0	0	0	0	0	0	0	0	0
RPL35B	0	0	0	0	0	0	0	0	0	0	0	0	0	0	0	0	27	0	0	0	0	0	0	15	0	0	0	0	0	0	0	0	0	0	0	0	0	0	0	0	0	0	0	0	0	0	0	0	0
VPS21	0	0	0	0	0	0	0	0	0	0	0	0	0	0	0	0	0	0	0	15	0	50	0	0	0	0	0	0	0	0	0	14	0	0	0	0	0	0	0	0	0	0	0	0	0	19	0	0	0
AAT2	0	0	0	0	0	0	0	0	0	0	0	0	0	0	0	0	0	31	0	0	0	0	0	0	0	113	0	71	0	0	0	0	0	0	0	0	0	0	0	28	0	0	0	0	0	0	0	0	0
COX5A	0	0	0	0	0	0	0	0	0	0	8	0	0	0	120	0	0	0	47	0	0	0	20	0	40	0	18	0	0	17	293	0	25	973	8	58	0	65	40	0	10	0	0	0	0	0	0	0	38
ADH3	0	0	0	0	0	0	0	0	0	0	0	0	0	17	0	17	0	0	0	0	0	38	0	0	8	0	0	16	0	0	6	0	0	0	0	0	0	0	0	0	0	0	17	0	0	0	0	0	0
DED81	0	0	0	0	0	0	0	0	0	0	0	0	0	0	0	0	0	0	0	0	0	0	16	0	0	0	0	0	0	0	0	0	0	14	0	0	0	0	0	0	0	0	0	0	0	0	0	0	0
RPS17A	0	0	0	0	0	0	0	0	0	0	0	0	0	0	0	0	0	0	0	0	0	0	0	0	0	0	0	0	0	0	0	0	0	0	0	0	0	0	0	0	0	0	0	0	0	0	0	0	0
BDH1	0	0	0	0	0	0	0	0	0	0	0	0	0	0	0	0	0	0	0	0	0	0	0	0	0	0	0	0	0	0	0	0	0	0	0	0	0	0	0	0	0	0	0	0	0	0	0	0	0
VMA2	0	0	0	0	0	0	0	0	0	0	0	0	0	0	0	0	0	0	0	0	0	0	0	0	0	15	0	0	0	0	0	0	0	0	0	0	0	0	0	0	0	0	0	0	0	0	0	0	14
RPT2	0	0	0	0	0	0	0	0	0	0	0	0	0	0	0	0	0	0	0	0	0	0	0	0	0	0	0	0	0	0	0	0	0	0	0	0	0	0	0	0	0	0	0	0	0	0	0	0	0
SOL4	0	0	0	0	0	0	12	0	0	0	0	0	0	0	0	13	0	55	8	0	0	0	0	0	0	0	0	0	0	19	0	0	0	26	0	0	16	0	0	0	0	0	0	0	0	0	0	0	0
RPS29A	0	0	0	0	21	0	0	0	15	0	0	0	0	0	17	0	0	0	0	0	0	23	0	0	0	0	0	0	0	0	0	0	0	0	0	0	0	0	0	0	0	0	26	0	0	0	78	0	0
BAT2	0	0	0	0	0	0	0	0	0	0	0	0	0	0	0	32	0	0	0	0	0	0	0	105	0	0	0	0	0	0	0	0	0	10	0	0	0	0	0	0	0	0	0	0	0	0	0	0	0
VMA13	0	0	0	6	0	0	0	0	0	0	0	0	0	0	0	0	0	0	9	0	0	22	0	0	0	0	39	0	28	0	0	13	0	0	0	0	0	9	0	0	0	51	0	0	0	28	6	0	0
RPB10	0	0	0	0	0	0	0	21	0	0	0	0	0	0	0	0	0	0	0	0	0	12	7	0	0	0	0	0	0	0	0	0	0	21	0	0	0	0	0	0	0	0	0	0	0	0	0	0	0
ATP15	0	0	0	0	0	0	0	0	0	0	0	0	0	0	0	0	0	0	0	0	0	0	0	0	0	0	9	0	0	7	0	0	19	0	0	0	0	0	0	0	0	0	0	0	0	0	0	0	0
RPS22B	0	0	0	0	0	0	0	0	23	0	0	0	0	0	0	0	0	0	0	0	0	0	0	0	0	0	17	0	0	0	51	0	0	11	0	0	0	0	8	0	0	17	0	0	14	0	19	0	0
YNK1	0	0	0	0	0	0	0	23	0	0	0	11	0	0	0	0	0	0	39	0	14	0	0	24	0	0	0	0	0	0	0	0	0	0	0	0	0	11	0	0	0	0	0	0	0	8	0	0	0
GRE2	0	0	0	0	0	0	0	0	0	0	0	27	13	23	0	0	19	0	0	0	0	0	0	0	0	0	6	0	0	0	0	0	0	0	0	0	0	0	0	0	0	0	0	0	0	0	0	0	0
TIF11	0	0	0	0	0	0	0	0	0	0	0	0	0	0	0	0	0	0	0	0	0	0	0	0	30	0	0	0	0	0	0	0	0	0	0	0	0	0	0	0	0	0	0	0	0	0	0	0	0
VMA10	0	0	0	0	0	0	0	0	0	0	0	0	0	0	0	0	6	0	0	0	0	0	0	0	0	0	0	0	0	0	0	0	0	0	0	0	0	0	0	0	0	0	0	0	0	0	0	0	0
QCR10	0	0	0	0	0	0	0	0	0	0	0	0	0	0	0	0	0	0	0	0	0	0	0	0	0	0	0	0	0	0	0	0	0	0	0	0	0	0	0	0	0	0	0	0	0	0	0	0	0
ARO8	0	0	0	0	0	0	0	0	0	0	0	0	0	0	0	0	0	0	0	0	0	0	0	0	0	0	0	0	0	0	0	0	0	0	0	0	0	0	0	0	0	0	0	0	0	0	0	0	0
VMA6	0	0	0	0	0	0	0	0	0	0	0	0	0	0	0	0	0	0	0	0	0	0	0	0	0	0	0	0	0	0	23	0	0	0	0	11	0	0	31	0	0	0	0	17	0	0	8	0	0
URA1	0	0	0	0	0	0	0	0	0	0	0	0	0	0	0	0	0	0	0	0	0	16	0	0	0	0	0	13	0	0	0	0	0	0	0	14	0	0	0	0	0	0	0	0	0	0	0	0	0
DPM1	0	0	0	0	0	0	0	0	0	0	9	15	18	0	36	0	0	0	0	0	22	0	0	0	0	0	0	0	29	0	0	0	0	17	0	0	141	0	9	0	0	0	12	0	0	0	0	13	12
NQM1	0	0	0	0	0	0	0	0	0	0	0	7	0	0	0	0	0	0	0	0	0	38	0	0	0	0	0	0	0	0	0	25	0	0	0	0	0	0	0	0	0	0	0	0	0	0	0	0	0
QCR8	0	0	0	0	0	16	0	0	0	0	0	0	0	0	0	0	0	18	0	30	0	0	0	0	0	0	0	0	0	0	6	0	0	0	0	0	0	0	0	0	0	0	0	0	0	0	0	0	0
GLO1	0	0	0	0	0	0	0	0	20	0	22	13	0	0	0	0	0	0	0	0	0	0	0	0	0	0	36	0	0	0	0	0	0	0	0	0	0	0	0	0	0	0	0	0	0	0	0	0	0
OST1	0	0	0	27	0	0	0	0	0	0	0	0	0	0	20	0	0	0	0	0	0	0	0	0	0	0	6	0	12	0	0	0	20	0	0	0	0	0	0	0	0	0	0	8	0	0	0	0	0
LPD1	0	0	0	0	0	0	0	0	0	0	0	0	0	0	0	0	0	0	0	0	0	0	0	0	0	20	0	0	0	0	0	0	0	0	0	0	0	0	0	0	0	0	0	0	0	0	0	0	0
RPA12	0	0	0	0	11	0	0	0	0	0	0	0	0	0	0	0	0	0	0	0	0	0	0	0	0	0	0	0	0	0	0	0	0	0	0	0	0	0	0	0	0	0	0	0	0	0	35	15	0
INH1	0	0	0	0	0	0	0	0	0	0	0	0	0	0	0	0	0	0	0	0	0	0	0	0	0	0	0	0	0	10	36	0	0	0	0	0	0	0	20	0	0	0	0	0	0	0	22	0	0
VRG4	0	0	0	0	0	0	0	0	0	0	0	0	0	0	0	0	0	0	0	0	0	0	0	0	0	0	0	0	0	0	0	0	0	0	0	0	0	0	0	0	8	0	0	0	0	0	0	0	0
ATP18	0	0	0	0	0	0	0	0	0	0	0	0	0	0	0	0	0	0	0	0	0	0	0	0	0	0	0	0	0	0	0	0	0	0	0	0	0	29	0	0	0	0	0	0	0	0	0	0	0
RIP1	0	0	0	22	0	0	0	0	0	5	0	0	0	0	0	0	0	0	29	16	0	0	0	0	0	0	17	0	0	0	0	0	0	11	0	0	35	0	0	0	0	0	0	0	0	0	0	0	0
UGA3	0	0	0	0	0	0	0	0	0	0	6	0	0	0	0	0	0	0	0	9	0	11	0	0	0	0	0	56	0	0	0	0	0	0	0	0	0	0	0	0	0	0	0	0	0	0	0	0	0
CEG1	0	0	0	0	0	0	0	0	0	0	0	0	0	0	0	0	0	0	0	0	0	0	0	0	0	0	0	0	0	0	0	0	0	0	0	0	0	0	0	0	0	46	0	0	0	21	0	0	0
PRS4	0	0	0	0	0	0	0	0	0	0	0	0	0	0	0	0	0	0	0	0	0	0	0	0	0	0	0	0	0	0	0	0	0	0	0	0	0	0	0	0	0	0	0	0	0	0	0	0	0
PAP1	0	0	0	0	0	0	0	0	0	0	0	0	0	0	0	0	0	0	0	0	0	0	0	0	0	0	0	0	0	0	0	0	0	0	0	0	0	0	0	0	0	0	0	0	0	0	0	0	0
YOL002C	0	0	0	0	0	0	127	0	0	0	18	0	0	0	0	0	0	18	0	0	5	0	0	0	0	0	0	0	0	0	0	0	0	0	0	0	0	0	0	0	0	0	0	0	0	0	0	0	0
RBK1	0	0	0	0	0	0	0	0	0	0	0	0	0	0	0	0	0	0	0	0	0	0	0	0	0	0	0	0	0	0	0	0	0	0	0	0	0	0	0	0	0	0	0	0	0	0	0	0	0
DLD1	0	0	0	0	0	0	0	0	0	0	0	13	0	0	0	0	0	0	0	0	0	0	0	0	0	0	0	55	0	0	0	0	0	0	0	0	0	0	0	0	0	0	0	0	0	0	0	0	0
YLR005W	0	0	0	0	0	0	0	12	0	0	0	0	0	0	0	0	0	0	0	0	0	0	0	0	15	0	0	0	6	0	0	0	0	0	0	0	32	0	0	0	0	0	0	0	0	0	0	0	0
GSH2	0	0	0	0	0	0	0	0	0	0	0	0	0	0	0	0	0	0	0	0	0	0	0	0	0	0	0	0	0	0	0	0	0	0	0	0	0	0	0	0	0	0	0	0	0	0	0	0	0
IDP1	0	0	16	8	0	0	0	0	0	0	21	0	0	19	0	0	181	0	40	0	50	0	0	41	187	0	29	361	8	0	0	0	16	0	45	0	0	0	0	0	0	0	12	0	0	0	11	0	0
GDB1	0	0	0	0	0	0	0	0	0	0	0	0	0	0	0	0	0	0	0	0	0	0	0	11	0	0	0	0	0	0	0	17	0	0	32	0	0	0	0	0	0	0	0	0	0	0	0	0	0
GAL3	0	0	0	0	0	0	0	0	0	27	0	0	0	0	0	0	0	0	0	0	0	0	0	0	0	0	0	0	0	0	0	0	0	0	0	0	0	0	0	0	0	0	0	0	0	0	0	0	0
HMO1	0	0	0	0	12	0	0	9	0	0	0	0	0	0	0	0	0	0	9	0	28	0	39	0	0	9	0	0	0	0	7	0	0	0	0	0	0	0	0	0	0	0	0	0	0	0	0	0	0
YLR164W	0	0	0	0	0	0	0	0	0	0	0	0	0	0	0	0	0	0	0	0	0	0	0	0	0	0	0	0	0	0	0	0	0	0	0	0	0	0	0	0	0	0	13	0	0	0	0	0	0
CDC37	0	0	0	0	0	0	0	0	0	0	0	0	0	0	0	0	0	0	0	0	0	0	0	0	0	0	0	0	0	0	0	0	0	0	0	0	0	0	0	6	0	0	0	0	0	0	0	0	0
COG1	0	0	0	0	0	0	0	0	0	0	0	0	60	0	0	0	0	0	0	0	0	10	15	0	0	0	0	0	0	0	0	0	0	0	0	0	0	0	0	0	0	0	0	0	0	0	0	0	0
SEC9	0	0	0	0	0	0	0	0	0	0	0	0	0	0	0	0	0	0	0	0	0	0	0	0	0	0	0	0	0	0	0	0	0	0	0	0	0	0	0	0	0	0	0	0	0	0	0	0	0
RPC31	0	0	0	0	0	0	0	0	0	0	0	0	0	0	0	0	0	0	0	0	0	0	0	0	0	0	0	0	0	0	0	0	0	0	0	0	0	0	0	0	0	0	0	0	0	0	0	0	0
SOL2	0	0	0	0	0	0	0	35	0	0	7	0	42	6	0	0	0	101	0	0	15	0	0	8	12	0	19	0	0	0	0	0	0	0	0	0	14	0	0	0	0	0	0	0	0	0	0	0	0
GLO2	0	0	0	0	0	0	0	0	0	0	0	0	0	0	0	0	0	0	0	0	0	0	0	0	0	0	0	0	0	0	0	0	0	0	0	0	0	0	0	0	0	0	0	0	0	0	0	0	0
ATP3	0	0	0	0	0	0	0	0	0	0	0	0	0	0	0	0	0	0	0	0	0	0	17	0	0	17	0	0	0	0	0	0	0	0	0	0	0	0	0	0	0	0	0	0	0	0	0	0	0
BIM1	0	0	0	0	0	0	0	0	0	0	0	0	0	0	0	0	0	0	0	0	0	0	0	0	0	0	0	0	0	0	0	0	0	0	0	0	0	0	0	0	0	0	0	0	0	0	0	0	0
PCC1	0	0	0	0	0	0	0	0	0	0	0	0	0	20	0	0	0	0	0	0	0	0	0	0	0	33	0	0	0	0	0	0	0	0	0	0	19	0	0	0	0	0	0	0	0	0	0	0	0
YRM1	0	0	0	14	0	0	0	0	5	0	0	0	0	6	0	0	0	0	0	0	0	0	0	0	0	0	27	0	0	0	0	0	17	0	0	0	0	0	0	0	0	9	0	52	0	0	0	0	0
SRB6	0	0	0	0	0	0	0	0	0	0	0	0	0	0	0	0	0	0	0	0	0	0	0	0	0	0	0	8	0	0	0	0	0	0	0	0	0	0	0	0	0	0	0	0	12	0	0	0	0
SPT3	0	0	0	0	0	0	0	0	0	0	0	0	0	0	0	0	0	0	0	0	0	0	0	0	0	0	0	0	0	0	0	0	0	0	0	0	0	0	0	0	23	0	0	0	0	0	0	0	0
SOL3	0	0	0	0	0	0	0	0	0	0	0	0	0	0	0	0	0	0	0	0	0	0	9	0	0	0	0	0	0	10	0	0	10	0	0	0	0	9	0	0	0	0	0	0	18	0	0	0	0
PSF1	0	0	0	0	0	0	0	0	0	0	0	0	0	0	0	17	0	0	0	0	0	0	0	0	0	0	0	0	0	0	0	0	0	0	0	0	0	0	0	0	0	0	0	0	0	0	0	0	0
RUB1	0	0	0	0	23	0	0	0	0	0	17	0	0	0	0	0	0	0	0	0	0	25	0	0	0	16	0	0	0	0	21	0	0	0	0	0	0	0	0	0	0	0	0	0	0	0	0	0	0
DLD2	0	0	18	0	0	0	0	0	0	22	0	0	0	0	0	0	0	0	0	0	0	13	0	0	32	0	0	0	0	7	0	0	0	0	0	0	0	0	0	0	0	0	0	0	0	0	0	0	0
DAD1	0	0	0	0	0	0	0	0	0	6	0	0	0	0	0	7	0	0	0	0	0	0	0	0	0	0	0	0	0	0	0	0	0	0	0	0	0	0	0	0	0	0	0	0	0	0	0	0	0
TPI1	0	0	0	0	0	0	0	0	0	0	0	0	0	0	45	0	14	0	0	0	0	0	0	0	0	19	0	0	0	107	0	0	0	0	0	0	0	0	0	0	0	0	0	0	0	0	0	0	0
VMA8	0	0	0	0	0	0	0	0	0	0	0	0	0	17	0	0	0	0	0	0	0	0	0	0	0	0	0	0	0	0	0	0	0	0	0	0	0	0	0	0	0	0	0	0	0	0	6	0	0
PRS2	0	0	0	0	0	0	0	0	0	0	0	0	0	0	0	0	0	0	0	0	0	0	0	0	0	0	0	0	0	0	0	0	0	0	12	0	0	0	0	0	0	0	0	0	0	0	0	0	0
DEG1	0	0	0	0	0	0	0	0	0	0	0	0	0	0	0	0	0	0	0	0	0	0	0	0	0	0	0	0	0	0	0	0	0	0	0	0	0	0	0	0	0	0	0	0	0	0	0	0	0
YHL012W	0	0	0	0	0	0	0	0	0	0	18	0	0	0	0	0	0	0	0	0	0	0	0	0	0	0	0	0	0	0	0	0	0	0	0	0	0	0	0	0	0	0	0	0	0	11	0	0	0
SGA1	0	0	0	0	0	0	0	0	0	0	0	0	0	0	0	0	0	0	0	0	0	0	0	0	0	0	0	0	0	0	0	0	0	0	0	0	0	0	0	0	0	0	0	0	0	0	0	0	0
GAT4	0	0	0	0	0	0	0	0	0	0	0	0	0	0	0	0	0	0	0	0	0	0	0	0	0	0	0	0	0	0	0	0	0	0	0	0	0	0	0	0	0	0	0	0	0	0	0	0	0
MAD2	0	0	0	0	0	0	0	0	0	0	0	0	53	0	0	0	0	0	0	20	0	0	15	0	0	0	0	18	0	0	0	0	0	0	34	0	0	37	0	0	0	0	0	48	0	0	0	0	0
GLG2	0	0	0	0	0	0	0	66	0	0	0	0	0	0	0	0	0	29	0	0	0	16	0	16	12	0	0	0	0	0	0	0	0	0	0	0	0	0	0	0	0	0	16	0	0	0	0	0	0
CDC8	0	0	0	0	0	0	0	0	0	0	0	0	0	0	0	0	0	0	0	0	0	0	0	0	0	0	0	0	0	0	0	0	0	0	0	0	0	0	0	0	0	0	0	0	0	0	0	0	0
PNP1	0	0	0	0	0	0	0	0	0	0	0	0	0	0	0	0	0	0	0	0	0	0	0	0	0	0	0	0	0	0	0	0	0	0	0	0	0	0	0	0	0	0	0	0	0	0	0	0	0
SEC22	0	0	0	0	0	0	0	0	0	0	0	0	0	0	0	0	0	0	0	0	0	0	0	0	0	0	0	0	0	0	0	0	0	0	0	0	0	0	9	0	0	0	0	0	0	0	0	0	0
KAR1	0	0	0	0	0	0	0	0	0	0	0	0	0	0	0	0	0	0	6	0	0	0	0	0	0	0	0	0	0	0	0	0	0	0	19	0	0	0	0	0	0	0	0	15	0	0	0	0	0
DAL82	0	0	60	0	0	0	0	0	0	0	0	0	0	0	0	0	12	0	0	0	0	0	0	0	29	0	0	0	0	0	0	0	0	0	0	16	0	0	0	0	0	0	0	0	0	0	0	0	0
CDC31	0	0	0	0	0	0	7	0	0	0	0	7	0	0	0	0	0	0	0	0	0	0	0	0	0	0	0	0	0	0	6	0	0	13	0	0	0	0	0	0	0	0	0	0	0	0	0	0	0
MET31	0	0	0	0	0	0	0	0	0	0	0	0	0	11	0	0	0	0	0	0	0	36	0	0	0	0	0	11	0	0	0	0	0	0	0	0	0	0	0	0	0	0	0	0	0	0	0	0	0
ATG5	0	0	0	0	0	0	0	0	0	0	0	0	0	0	0	0	0	0	0	0	0	0	0	0	0	0	0	0	0	0	0	0	0	0	0	0	0	0	0	0	0	0	0	0	0	0	0	0	0
HUT1	0	0	0	0	0	0	0	0	0	0	0	0	0	0	0	0	0	0	0	0	0	19	0	0	0	40	0	0	44	0	0	0	0	0	0	13	0	0	0	0	0	0	0	0	0	0	0	0	0
YPR199C	0	0	0	0	0	0	0	0	0	39	0	0	0	0	0	0	0	0	0	0	0	0	0	0	0	18	0	0	0	0	0	0	0	0	0	0	0	0	0	0	0	0	0	0	0	0	0	0	0
ALD4	0	0	0	0	0	0	0	0	0	0	0	0	0	0	0	0	0	7	0	0	0	0	0	0	0	0	0	0	0	0	0	0	0	0	0	0	0	0	0	0	0	0	0	0	0	0	0	5	0
QCR7	0	0	0	0	17	0	0	0	0	0	0	20	0	0	0	0	0	0	0	0	0	0	0	0	15	0	16	0	0	0	69	0	0	0	18	0	0	0	0	0	0	17	0	0	0	0	0	0	0
SDH2	0	0	0	0	0	0	0	0	0	0	0	0	0	0	0	0	0	0	0	0	0	0	0	0	0	0	0	0	0	0	0	0	0	0	0	0	0	0	0	0	0	0	0	0	0	0	0	0	0
GLK1	0	0	0	0	0	0	0	0	0	0	0	10	0	22	21	0	0	0	0	23	0	0	0	0	0	81	0	0	167	0	0	27	0	0	52	0	78	0	0	0	0	173	233	71	0	0	0	0	12
TIM11	0	0	0	0	0	0	0	0	0	0	0	0	0	0	0	0	0	0	0	0	0	0	0	0	0	0	0	0	0	0	9	0	0	0	0	0	0	0	0	0	12	0	0	6	0	0	0	0	0
ATP19	0	0	0	0	0	0	0	0	0	0	0	0	22	0	0	0	0	0	0	0	0	0	0	0	0	0	0	0	0	0	0	0	0	0	0	0	0	0	0	0	0	0	0	0	0	0	0	0	0
ATP16	0	0	0	0	0	0	0	0	0	0	0	0	0	0	0	0	0	0	0	0	0	0	0	0	0	0	0	0	0	0	0	0	0	19	0	0	0	11	0	0	0	0	0	0	0	0	0	0	0
ATP20	0	0	0	0	0	0	0	0	0	0	0	16	0	0	0	0	0	0	0	0	0	0	0	0	0	0	0	0	0	0	0	0	0	0	0	0	0	0	0	21	0	0	0	0	0	0	0	0	30
SDH3	0	0	0	0	0	0	0	0	0	0	0	0	0	0	0	0	0	0	0	0	0	0	0	0	0	0	54	0	0	31	0	0	0	0	0	0	17	0	0	0	0	0	0	0	0	0	17	0	0
COX9	0	0	0	0	0	0	0	0	0	0	0	0	0	0	0	0	0	0	0	0	0	0	0	0	0	0	0	0	0	0	0	0	0	0	0	0	0	0	0	0	0	0	0	0	0	0	0	0	0
BNA2	0	0	0	0	0	0	0	0	5	0	0	0	0	8	0	0	0	0	0	0	0	0	0	0	0	0	0	0	0	0	0	0	0	0	0	0	0	0	0	0	0	0	0	0	0	0	0	0	0
CTK2	0	0	0	0	0	0	0	0	0	0	0	0	0	0	0	0	0	0	0	0	0	0	0	0	0	0	0	0	0	0	0	0	0	0	0	0	0	0	0	0	0	0	0	0	0	0	0	0	0
DAP1	0	0	0	0	10	0	0	0	0	0	0	0	0	19	0	0	0	0	0	0	0	0	0	0	0	12	0	0	0	0	0	0	0	0	0	0	0	0	0	0	0	0	0	0	0	0	0	0	0
ERG1	0	0	0	0	0	0	0	0	0	0	0	13	0	0	0	0	33	0	0	0	0	0	0	0	0	0	42	0	0	0	0	0	0	0	0	0	0	0	0	0	0	0	0	0	0	0	0	0	0
ERG9	0	0	0	0	0	0	0	0	0	0	0	0	0	0	0	0	0	0	0	0	0	0	0	0	0	0	0	0	0	0	0	0	0	0	0	0	0	0	0	0	0	0	0	0	0	0	0	0	0
GAS5	0	0	0	0	0	0	0	0	0	0	0	0	0	78	0	34	0	0	0	17	0	12	0	0	0	0	0	0	0	0	0	0	0	0	0	0	0	0	0	0	0	0	0	0	0	0	0	0	0
GDH3	0	0	0	0	0	0	0	0	0	0	0	0	0	0	0	0	0	0	0	0	0	0	0	0	0	0	10	6	0	0	0	0	0	0	0	0	0	37	0	0	0	10	0	0	0	0	0	0	0
GEP4	0	0	0	0	0	0	0	0	0	0	0	0	0	0	0	0	7	0	0	0	0	0	0	0	0	0	0	0	0	0	0	0	9	0	0	0	0	0	0	0	0	0	0	0	0	6	0	0	0
GND2	0	0	0	0	0	0	0	0	0	0	0	0	0	0	0	0	0	0	0	0	0	0	0	0	0	0	0	0	0	17	0	0	0	0	0	0	0	0	0	0	0	0	0	0	0	0	0	0	0
HMX1	0	0	0	0	0	0	7	0	0	0	0	0	0	0	0	0	0	0	0	0	0	0	0	0	0	0	0	0	0	0	0	0	12	0	15	0	0	0	0	11	0	7	0	0	0	0	0	0	0
HSP78	0	0	0	0	0	0	0	0	0	0	0	0	0	0	0	0	0	0	0	0	0	0	0	0	0	0	0	0	0	0	0	0	0	0	0	0	0	0	0	0	0	0	0	0	0	0	0	0	0
MET8	0	0	0	0	0	0	0	0	0	0	0	0	0	0	0	0	5	0	0	0	0	0	0	0	0	0	0	0	0	0	0	0	0	0	0	0	0	0	0	0	0	0	0	0	0	0	0	0	0
PDR15	0	0	0	14	0	10	0	0	0	0	0	21	0	0	0	0	0	0	0	0	0	0	0	0	0	0	0	0	0	0	0	0	0	0	16	0	18	0	22	0	5	0	28	0	0	0	14	0	10
PFA3	0	0	0	0	0	0	0	0	0	0	0	0	0	0	0	12	0	0	0	0	0	0	0	0	0	0	0	0	0	0	0	0	0	0	0	0	0	0	0	0	0	0	16	0	0	0	0	0	0
PHM8	0	0	0	0	0	0	0	0	0	0	0	0	0	0	0	0	0	0	0	0	0	0	0	0	0	0	0	0	0	0	0	0	0	0	0	0	0	0	0	0	0	0	0	0	0	0	0	0	0
POL12	0	0	0	0	0	0	0	0	0	0	0	0	0	0	0	0	0	0	0	0	0	0	0	0	0	0	0	0	0	0	0	0	0	0	0	0	0	0	0	0	0	0	0	0	0	0	0	0	0
RAD26	0	0	0	0	0	0	0	0	0	0	0	0	0	0	0	0	0	0	0	0	0	0	0	0	0	0	0	0	0	0	0	0	0	0	0	0	0	0	0	0	0	0	0	0	0	0	0	0	0
REV7	0	0	0	0	0	0	0	0	0	0	15	0	0	0	0	0	0	78	0	0	13	0	10	0	0	0	8	0	0	0	0	20	0	0	0	0	0	9	0	0	0	0	0	0	0	0	0	0	0
RGS2	0	0	0	0	0	0	0	0	0	0	0	18	0	0	0	0	0	0	0	0	0	0	0	0	0	0	0	0	0	0	0	0	0	0	0	0	0	0	0	0	0	0	0	0	0	0	0	0	0
RPC19	0	0	0	0	0	0	0	0	0	0	0	0	0	0	0	0	0	0	0	0	0	0	0	0	18	0	0	0	0	0	0	0	0	0	0	0	0	0	0	0	0	0	0	0	49	0	0	21	0
SCD26	0	0	0	0	0	0	0	0	0	0	0	0	16	0	0	0	0	0	0	0	0	20	0	0	0	0	0	9	0	0	0	0	0	0	0	0	0	0	0	0	0	0	0	0	0	0	0	0	0
SED2	0	0	5	0	0	0	0	0	0	0	0	0	0	0	0	0	0	0	0	0	0	0	0	0	21	0	0	0	0	0	0	0	0	0	0	17	0	0	0	0	0	0	0	0	0	0	0	0	0
SES1	0	0	0	0	0	0	0	0	0	0	0	0	0	0	0	0	0	0	0	0	0	18	19	0	0	0	0	0	0	0	0	0	0	60	0	0	0	0	0	0	10	0	0	0	0	24	0	0	0
SET6	0	0	0	0	0	0	0	0	0	0	0	0	0	0	0	0	0	0	0	0	0	0	0	0	0	0	0	0	0	0	0	0	0	0	0	0	0	0	0	0	0	0	0	0	0	0	0	0	0
SFG1	0	0	0	0	0	0	0	0	0	5	0	0	0	0	0	0	0	0	0	0	0	6	6	8	0	0	0	0	0	0	0	0	0	0	0	0	0	0	0	19	0	0	0	11	0	0	0	0	0
SLS1	0	0	0	0	0	0	0	0	0	0	0	0	0	0	0	0	0	0	0	0	0	0	0	0	0	0	0	0	0	0	0	0	0	0	0	0	0	0	0	0	0	0	0	0	0	0	0	0	0
SNZ2	0	0	0	0	0	0	0	0	0	0	0	0	0	0	0	0	0	0	0	0	0	0	0	0	0	0	0	0	0	0	0	0	0	0	15	0	9	0	0	0	0	0	0	0	0	0	0	0	0
SRX1	0	0	10	0	5	0	0	0	0	0	0	0	5	0	0	0	7	37	0	0	15	0	0	33	0	53	0	0	9	0	9	30	7	0	0	0	0	0	12	0	0	0	0	0	0	0	0	0	0
STR2	0	0	0	0	0	0	0	0	0	0	0	0	0	0	0	0	0	0	0	0	0	0	0	0	0	0	0	0	0	0	0	0	0	0	0	0	0	0	0	0	0	0	0	0	0	0	0	0	0
TDA4	0	0	0	0	0	0	0	0	0	0	0	0	0	0	0	0	0	0	0	0	0	0	0	0	0	0	0	0	0	0	16	0	0	0	0	0	19	0	0	0	0	0	0	0	0	0	0	0	0
TIF51A	0	0	0	0	0	0	0	0	0	0	0	0	0	0	0	0	0	0	0	0	0	0	5	0	0	0	0	0	0	0	29	0	0	0	0	0	0	0	0	16	0	0	0	0	0	0	0	0	0
TRG1	0	0	0	0	0	0	0	0	0	0	0	0	0	0	0	0	0	0	0	0	0	0	0	0	0	0	0	0	0	0	0	0	0	0	0	0	0	0	0	0	0	0	0	0	0	0	0	0	0
UPS1	0	0	0	0	0	0	0	0	0	0	0	0	0	0	0	0	0	0	0	0	0	0	0	0	0	0	0	0	0	0	0	0	0	0	0	0	0	0	0	0	0	0	0	0	0	0	0	0	0
UTP30	0	0	0	0	0	0	0	0	0	0	0	0	0	0	0	0	0	0	0	0	0	0	0	0	0	0	30	0	14	0	53	0	12	0	0	0	0	0	0	0	0	0	0	0	0	0	0	0	0
VMA5	0	0	0	0	0	0	0	0	0	0	0	0	0	0	0	0	0	0	0	0	0	0	0	0	0	0	0	0	0	0	0	0	0	0	0	0	0	0	0	0	0	0	0	0	0	0	0	0	0
VPT7	0	0	0	0	0	0	0	0	0	0	0	0	0	0	0	0	0	0	0	0	0	0	0	0	0	0	0	0	0	0	0	0	0	0	0	0	0	0	0	0	0	0	0	0	0	0	0	0	0
VTH1	0	0	0	0	0	0	0	0	0	0	0	0	0	0	6	0	0	0	0	0	0	0	0	0	0	0	0	0	0	0	0	54	0	0	0	0	0	0	0	0	5	0	0	12	0	0	0	0	0
YAF5	0	0	0	0	0	0	0	0	0	0	0	0	0	0	0	0	0	0	0	0	0	0	0	0	0	0	0	0	0	0	0	0	0	0	0	0	0	0	0	0	0	0	0	0	0	0	0	0	0
YAH1	0	0	0	0	0	0	13	0	0	0	0	0	0	0	0	0	0	0	0	0	0	0	0	0	0	0	0	0	0	0	7	0	0	0	0	0	0	0	0	0	0	0	0	14	0	0	0	0	0
YCAT	0	0	0	41	0	6	0	0	0	0	0	0	0	10	17	0	0	11	0	14	0	0	0	0	0	0	0	0	17	0	15	0	0	0	0	0	0	0	0	0	0	0	0	0	0	0	11	0	0
YCL012C	0	0	0	0	0	0	0	0	0	0	0	0	0	0	0	0	14	0	0	0	0	0	0	0	0	0	0	0	0	0	0	0	0	0	0	0	0	0	0	0	0	0	0	0	0	0	0	0	0
YCL068C	0	0	0	0	0	0	0	0	0	0	0	0	0	0	0	0	0	0	0	0	0	0	0	0	0	0	0	0	0	0	0	0	0	0	0	0	0	0	0	0	0	0	0	0	0	0	0	0	0
YDL124W	0	0	0	0	0	0	0	0	0	0	0	0	0	0	0	0	0	0	0	0	0	0	0	0	0	0	0	0	0	0	0	0	0	0	0	0	0	0	0	0	0	0	0	0	0	0	0	0	0
YDL241W	0	0	0	0	0	0	0	0	0	0	0	0	0	0	0	0	0	0	0	0	0	0	0	0	0	0	0	0	0	0	0	0	0	14	0	26	0	0	29	0	0	0	0	0	0	0	0	0	0
YHB4	0	0	0	0	0	0	0	0	0	0	0	0	0	0	0	0	0	0	0	0	0	0	0	0	0	0	0	0	0	0	0	0	0	0	0	0	0	0	0	0	0	0	0	0	0	0	0	0	0
YIH1	0	0	0	0	0	0	0	0	0	0	0	0	0	0	0	0	0	0	0	0	0	0	0	0	0	0	0	0	0	0	0	0	0	0	0	0	0	0	0	0	7	0	0	0	0	0	0	0	0
YJL068C	0	0	0	0	0	0	0	0	0	13	0	0	0	0	0	0	0	0	0	0	0	0	21	0	0	0	6	0	0	0	0	0	0	0	0	0	0	6	0	0	0	0	0	0	0	0	0	0	0
YJL118W	0	0	0	0	0	0	0	0	0	0	0	0	0	0	0	0	0	0	0	0	0	0	0	0	0	0	0	0	0	0	0	0	0	0	0	0	0	0	0	0	0	0	0	0	0	0	0	0	0
YJR005C-A	0	0	0	0	0	0	0	0	0	0	0	50	0	0	0	0	0	0	0	0	199	0	22	51	0	0	6	0	0	0	19	0	0	18	0	0	12	0	0	0	12	0	0	0	0	0	0	0	0
YKE2	0	0	6	27	17	25	18	37	0	78	0	130	37	0	0	0	0	0	0	0	0	0	0	0	0	14	23	91	0	0	24	0	0	0	0	23	42	0	0	0	0	0	0	21	0	0	0	0	31
YKR045C	0	0	0	0	0	0	0	0	0	0	0	0	0	0	0	0	0	0	0	0	0	0	0	0	0	0	0	29	0	0	0	28	0	0	0	0	0	20	0	0	0	0	0	0	0	0	0	0	0
YLR049C	0	0	0	0	18	0	0	0	0	0	23	0	0	0	0	0	0	0	0	0	0	0	0	0	0	0	0	0	0	0	0	0	0	12	0	0	0	0	0	0	0	0	0	0	0	0	0	0	0
YNR071C	0	0	0	0	0	0	0	0	0	0	0	5	0	0	0	0	0	0	0	0	0	0	0	0	0	0	0	0	0	0	0	0	0	0	22	0	0	0	0	6	0	0	0	0	0	0	0	0	0
YOR032W-A	0	0	0	0	0	0	0	0	0	0	0	0	0	0	0	0	0	0	0	0	0	0	0	0	0	0	0	0	0	0	0	0	0	0	0	0	0	0	0	0	0	0	0	23	0	0	0	0	0
YPL088W	0	0	0	0	0	0	0	0	0	0	0	0	0	0	0	0	0	0	0	0	0	0	0	0	0	0	0	0	0	0	0	0	0	0	0	0	0	0	0	0	0	0	0	0	0	0	0	0	0
ZPS1	0	0	0	0	0	0	0	0	0	0	0	0	0	0	0	0	0	24	0	6	0	0	0	0	26	62	0	0	23	15	0	0	0	0	0	0	0	0	0	0	0	0	0	0	0	0	16	0	0
RPL16A	0	0	0	0	0	0	0	0	0	0	8	0	36	0	0	0	7	63	0	0	0	0	0	0	0	0	0	0	0	0	0	0	0	0	16	0	0	0	0	0	0	0	0	0	0	0	0	0	0
RPL21A	0	0	0	0	0	0	10	0	0	0	0	0	0	0	0	0	0	0	0	0	0	84	0	0	0	0	0	0	0	0	0	0	0	0	0	0	0	0	0	0	0	0	0	0	0	0	0	0	0
RPL21B	0	0	0	0	0	0	0	0	0	0	0	0	0	0	0	0	0	0	0	0	0	0	0	0	0	0	0	0	0	0	0	0	0	0	0	0	0	0	0	0	0	0	0	0	7	0	0	0	0
RPL2B	0	0	0	0	0	0	0	0	0	0	0	0	0	0	0	0	0	0	0	0	0	0	0	0	0	0	0	0	0	0	0	0	0	0	0	0	0	0	0	0	0	0	0	0	0	0	0	0	0
RPL9A	0	0	0	0	0	0	0	0	0	0	0	0	0	0	0	0	0	0	0	0	0	0	0	0	0	0	0	0	0	0	0	0	0	0	0	0	0	0	0	0	0	0	0	0	0	0	0	0	0
RPS10B	0	0	0	0	0	0	0	0	0	0	0	0	0	0	0	0	0	0	0	0	0	8	0	0	0	0	0	0	0	0	0	0	0	0	0	0	0	0	0	0	0	14	0	0	0	0	6	0	0
RPS19A	0	0	0	33	0	0	0	0	0	0	0	0	0	0	0	34	0	0	0	124	0	0	0	17	104	0	0	0	0	0	0	0	0	0	0	0	0	0	0	0	6	0	0	0	18	0	0	0	0
RPS2	0	0	0	0	0	0	0	0	0	0	0	0	0	0	0	0	0	5	0	0	0	0	0	0	0	0	0	0	0	0	0	0	0	0	0	0	0	0	0	0	0	0	0	0	0	0	0	0	0
RPS24A	0	0	0	0	0	0	0	0	0	0	0	0	0	0	0	0	0	0	0	0	0	0	21	0	0	0	0	0	0	0	0	0	0	35	0	0	0	0	0	0	0	0	0	0	9	0	0	0	0
RPS27B	0	0	0	0	0	0	0	0	0	0	0	0	0	0	0	0	0	0	0	0	0	0	0	0	0	0	0	0	0	5	0	12	6	0	0	0	0	0	9	0	0	0	0	0	0	0	0	0	0
ARF1_1to8_10snps_1	0	0	0	0	0	0	0	11	0	0	0	0	0	20	0	0	0	0	5	0	19	0	80	0	0	0	80	11	12	0	0	21	0	25	0	0	38	0	0	0	0	0	11	0	0	15	0	0	0
ARF1_9to18_10snps_1	0	0	0	0	0	0	0	0	0	0	0	0	10	0	0	0	0	0	0	0	0	0	33	0	0	0	33	0	0	0	0	30	0	0	0	0	6	0	0	0	0	0	0	0	0	0	0	0	0
ARF1_19to28_10snps_1	0	0	0	0	0	0	0	0	0	0	0	0	0	0	0	0	0	0	0	0	0	0	33	0	0	0	13	29	0	0	0	0	0	0	0	0	22	0	0	0	0	0	0	0	0	0	0	0	0
ARF1_29to38_10snps_1	0	0	0	0	0	0	0	0	0	0	0	0	0	0	0	0	0	0	13	0	0	0	33	0	0	0	10	0	0	0	0	0	0	0	0	0	0	0	0	0	0	0	0	0	0	15	0	0	0
ARF1_39to48_10snps_1	0	0	0	0	0	0	0	0	0	0	0	0	0	0	0	0	0	0	18	0	0	0	0	0	0	0	0	0	0	0	0	0	0	0	42	0	0	0	0	0	0	0	10	0	0	0	0	0	0
ARF1_49to58_10snps_1	0	0	0	0	16	0	0	0	0	0	0	0	0	0	0	0	7	0	0	0	0	0	34	0	0	0	14	24	0	0	0	14	0	0	19	0	6	0	0	0	0	0	0	0	0	0	0	0	0
ARF1_59to68_10snps_1	0	0	0	15	0	0	0	0	0	0	0	0	0	0	0	0	0	0	27	0	0	0	51	0	0	0	0	27	0	0	0	0	0	0	12	0	0	0	0	0	0	0	0	0	0	0	0	0	0
ARF1_69to78_10snps_1	0	0	0	0	0	19	0	0	0	0	0	0	0	0	0	0	0	0	0	0	0	0	0	0	0	0	0	0	0	0	0	0	0	0	0	0	0	0	0	0	0	0	0	0	0	0	0	0	0
ARF1_79to88_10snps_1	0	0	0	5	0	0	23	0	0	5	0	0	0	0	0	0	0	0	0	0	0	0	78	0	0	0	9	0	0	19	5	30	0	0	0	11	0	0	0	0	0	0	0	0	0	0	0	0	0
ARF1_89to98_10snps_1	0	0	0	0	0	0	0	0	0	0	0	0	0	0	0	0	0	0	0	0	0	0	0	0	13	128	0	0	177	0	41	41	5	0	0	0	259	0	38	0	9	0	14	0	0	63	0	0	0
ARF1_99to108_10snps_1	0	0	0	0	0	0	0	0	0	17	0	0	0	0	0	0	0	0	0	0	0	0	50	0	0	0	60	28	33	0	28	16	0	15	7	0	111	0	0	0	0	0	21	0	0	16	0	0	0
ARF1_109to118_10snps_1	0	0	0	0	8	0	0	0	0	0	0	0	0	0	0	0	0	0	0	0	0	0	101	0	0	0	61	18	14	0	13	0	0	0	23	0	0	0	0	0	0	0	0	0	0	0	0	0	0
COX5A_1to8_10snps_1	0	0	0	0	0	0	28	0	11	0	0	0	0	0	0	0	0	0	39	0	0	0	0	0	0	0	0	0	0	19	118	0	0	343	0	10	0	5	31	0	0	0	0	0	0	0	0	0	0
COX5A_9to18_10snps_1	0	0	0	0	0	0	14	0	0	0	0	0	0	0	39	0	0	0	69	0	0	21	0	0	29	0	0	0	9	0	234	0	0	472	0	0	0	0	0	0	0	0	0	0	0	0	0	0	0
COX5A_19to28_10snps_1	0	0	0	0	0	0	0	0	0	0	0	0	0	0	26	0	7	0	10	0	0	10	0	0	0	0	0	0	0	0	33	0	0	41	0	0	0	0	0	0	0	0	0	0	0	0	0	0	0
COX5A_29to38_10snps_1	0	0	0	0	0	0	0	0	0	0	0	0	0	0	0	0	0	0	0	0	0	0	0	0	0	0	0	0	0	0	0	0	0	30	0	0	0	0	0	0	0	0	0	0	0	0	0	0	0
COX5A_39to48_10snps_1	0	0	0	0	0	0	0	0	0	0	0	0	0	0	0	0	0	0	0	0	0	0	0	0	0	0	0	0	0	0	5	0	0	68	0	0	0	8	0	0	0	0	0	0	0	0	0	0	0
COX5A_49to58_10snps_1	0	0	0	0	0	0	0	0	0	0	0	0	0	0	0	0	0	0	0	0	0	0	0	0	0	0	0	0	0	0	18	0	0	49	0	0	0	0	0	0	0	0	0	0	0	0	0	0	0
COX5A_59to68_10snps_1	0	0	29	0	0	0	0	0	6	0	0	0	0	0	34	0	0	0	0	25	0	0	0	0	0	0	0	0	0	17	116	0	0	474	0	0	0	0	0	0	0	12	99	0	13	0	0	0	116
COX5A_69to78_10snps_1	0	0	7	0	0	0	39	0	0	0	0	0	15	0	0	0	0	0	0	0	0	19	0	0	0	0	0	0	0	29	124	0	5	210	0	41	0	0	48	0	0	0	0	6	0	0	0	0	0
COX5A_79to88_10snps_1	0	0	16	0	22	0	0	0	0	0	0	0	0	9	30	0	0	0	66	0	0	0	0	0	57	0	89	0	0	176	28	0	17	14	331	0	0	0	0	0	0	0	0	0	0	0	0	0	13
COX5A_89to98_10snps_1	0	0	0	0	0	0	0	0	0	0	0	0	0	0	0	0	0	0	0	0	0	0	0	0	0	0	0	0	0	0	103	0	0	11	0	0	0	0	0	0	0	0	0	0	0	0	0	0	0
COX5A_99to108_10snps_1	0	0	0	0	0	0	0	0	0	0	0	0	0	0	0	0	0	0	0	0	0	0	0	0	9	0	0	0	0	0	0	0	0	27	0	0	0	0	0	0	0	0	0	0	0	0	0	0	0
COX5A_109to118_10snps_1	0	0	0	0	0	0	0	0	0	0	0	0	0	0	0	0	0	0	0	0	0	0	0	0	0	0	0	0	0	0	14	0	0	16	0	0	0	0	0	0	0	0	0	0	0	0	0	0	0
GAL7_1to8_10snps_1	0	0	0	0	0	0	0	0	0	0	0	36	0	0	0	0	0	0	0	19	0	0	0	0	0	0	14	0	0	42	0	19	10	0	0	0	0	22	0	0	0	0	0	0	0	0	0	0	0
GAL7_9to18_10snps_1	0	0	0	0	0	0	0	0	0	0	0	19	0	0	0	6	0	0	0	24	0	6	0	0	6	0	0	0	0	6	0	0	0	0	0	0	0	0	0	0	0	0	0	0	0	0	0	0	0
GAL7_19to28_10snps_1	0	0	0	0	0	0	0	0	0	0	0	14	0	0	0	0	0	0	0	0	0	0	0	0	0	0	0	0	0	0	0	0	0	0	0	0	0	0	0	0	0	0	0	0	0	0	0	0	0
GAL7_29to38_10snps_1	0	0	0	0	0	0	0	0	0	0	0	0	0	0	0	0	0	0	0	0	0	0	0	0	0	0	0	0	0	0	0	0	0	0	0	0	0	0	0	0	0	0	0	0	0	0	0	0	0
GAL7_39to48_10snps_1	0	0	0	0	0	0	0	0	0	0	0	0	0	0	0	21	0	0	0	28	0	0	0	0	0	0	0	0	0	0	0	0	0	0	0	0	0	0	0	0	0	0	0	0	0	0	0	0	0
GAL7_49to58_10snps_1	0	0	0	0	0	0	0	0	27	0	0	35	0	0	0	15	0	0	0	50	0	0	0	28	0	0	0	5	0	7	0	15	0	0	0	0	0	10	0	0	0	0	0	0	0	0	0	0	0
GAL7_59to68_10snps_1	0	0	0	23	0	0	0	0	0	0	0	13	0	0	0	28	0	0	15	5	0	0	20	0	0	0	0	0	0	44	0	0	0	0	0	0	0	15	0	0	0	0	0	0	0	0	0	0	0
GAL7_69to78_10snps_1	0	0	0	0	0	0	0	0	0	0	0	13	0	0	0	0	0	0	14	34	0	0	0	0	0	0	0	0	0	11	0	8	0	0	8	0	0	0	0	0	0	0	0	0	0	0	0	0	0
GAL7_79to88_10snps_1	0	0	0	0	0	0	0	0	0	21	0	0	0	0	14	38	0	0	0	83	19	0	8	0	0	0	0	0	0	19	0	0	0	0	15	0	0	0	0	0	0	0	0	0	0	0	0	0	0
GAL7_89to98_10snps_1	0	0	0	11	0	0	0	0	0	0	0	69	0	0	0	9	0	0	0	0	0	50	0	0	0	0	0	16	0	0	0	0	15	0	0	0	0	0	0	0	0	0	0	0	0	0	0	0	0
GAL7_99to108_10snps_1	0	0	0	0	0	0	0	0	0	0	0	0	0	0	0	0	0	0	40	0	0	0	0	0	0	0	0	0	0	0	0	0	0	0	0	0	0	0	0	0	0	0	0	0	0	0	0	0	0
GAL7_109to118_10snps_1	0	0	0	0	0	0	0	0	0	0	0	22	0	0	0	9	0	0	0	18	0	0	0	0	0	0	0	0	0	0	0	0	0	0	0	0	0	0	0	0	0	0	0	0	0	0	0	0	0
HSP12_1to8_10snps_1	0	0	0	0	0	0	0	0	0	0	0	0	0	0	0	0	0	0	0	0	0	0	0	0	0	0	0	0	0	0	0	0	0	0	0	0	0	0	0	0	0	0	0	0	0	0	0	0	0
HSP12_9to18_10snps_1	0	0	0	0	0	0	0	0	0	0	0	0	0	0	0	0	0	0	0	0	0	0	0	0	0	0	0	0	0	0	0	0	0	0	0	0	0	0	0	0	0	0	0	0	0	0	0	0	0
HSP12_19to28_10snps_1	0	0	0	0	0	16	0	0	0	10	0	0	0	0	0	0	0	0	0	0	0	0	0	0	0	0	0	0	0	12	0	0	0	0	0	0	0	0	0	0	0	0	0	0	0	0	0	0	0
HSP12_29to38_10snps_1	0	0	0	0	0	0	0	0	0	0	0	0	0	0	0	0	0	0	0	0	0	0	0	0	0	0	0	0	0	0	0	0	0	0	0	0	0	0	0	0	0	0	0	0	0	0	0	0	0
HSP12_39to48_10snps_1	0	0	0	0	0	0	0	0	0	14	0	0	0	0	0	0	0	0	0	0	0	0	0	0	0	0	0	0	0	0	0	0	0	11	0	0	10	0	0	0	0	0	11	0	0	0	0	0	0
HSP12_49to58_10snps_1	0	0	0	0	0	0	0	0	0	13	0	0	0	0	0	0	0	0	0	0	0	0	0	0	0	0	0	0	0	13	0	0	0	0	0	0	0	11	0	0	0	0	0	0	0	0	0	0	0
HSP12_59to68_10snps_1	0	0	0	0	0	0	0	0	0	0	0	0	20	0	0	0	0	0	0	0	0	0	0	0	0	0	0	0	9	0	0	0	0	12	0	0	0	0	0	0	0	0	0	0	0	0	0	0	0
HSP12_69to78_10snps_1	0	0	0	0	0	0	0	0	0	30	0	0	8	0	0	0	0	0	0	0	0	0	0	0	15	0	0	0	0	0	0	0	0	11	0	0	0	0	0	0	0	0	0	0	0	0	0	0	0
HSP12_79to88_10snps_1	0	0	0	0	15	0	0	0	6	133	0	0	7	0	0	0	0	0	0	68	16	9	10	11	0	0	17	0	5	12	41	0	0	0	0	0	0	0	0	0	0	0	0	0	0	0	0	0	0
HSP12_89to98_10snps_1	0	0	6	0	0	0	0	0	0	0	0	0	0	0	0	0	0	0	0	0	0	0	0	0	0	0	0	0	0	0	0	0	0	18	0	0	0	12	0	0	0	0	0	0	0	0	0	0	0
HSP12_99to108_10snps_1	0	0	0	0	0	0	0	0	0	0	0	0	0	0	0	0	0	0	0	0	0	0	0	0	0	0	0	0	0	9	0	0	0	0	0	0	0	22	0	0	0	0	0	0	0	0	0	0	0
HSP12_109to118_10snps_1	0	0	0	0	0	0	0	0	0	0	0	0	0	0	0	0	0	0	0	0	0	0	0	0	0	0	0	0	0	0	0	0	0	0	0	0	0	0	0	0	0	0	0	0	0	0	0	0	0
HXT1_1to8_10snps_1	0	0	0	0	0	0	0	0	0	0	0	0	0	0	0	0	0	0	0	0	0	0	0	0	0	0	0	0	0	5	0	30	0	0	9	0	0	0	0	0	22	0	0	0	0	0	0	0	0
HXT1_9to18_10snps_1	0	0	0	0	0	0	0	0	0	0	0	0	0	0	0	0	0	0	0	0	0	25	0	0	0	19	0	0	0	0	0	20	0	0	0	0	0	0	0	0	39	0	8	0	0	0	0	0	0
HXT1_19to28_10snps_1	0	0	0	0	0	0	0	0	0	0	0	0	0	0	0	0	0	0	0	0	0	0	9	0	21	0	0	0	0	6	0	49	0	0	54	0	0	0	0	18	61	0	35	0	0	0	0	8	23
HXT1_29to38_10snps_1	0	0	0	0	0	0	0	0	0	0	0	0	0	0	0	0	0	0	0	0	0	0	0	0	0	0	0	0	0	0	0	0	0	0	0	0	0	0	0	0	0	0	0	0	0	0	0	0	0
HXT1_39to48_10snps_1	0	0	0	0	0	0	0	0	0	0	0	0	0	0	0	0	0	0	0	0	0	0	8	0	0	0	0	0	0	0	0	63	0	5	14	0	0	0	0	0	0	0	39	0	0	0	0	0	0
HXT1_49to58_10snps_1	0	0	0	0	0	7	0	0	0	0	0	0	0	0	0	0	0	0	0	0	0	0	0	0	0	0	0	0	0	0	0	8	0	0	0	0	0	0	0	28	21	0	22	0	0	0	14	0	0
HXT1_59to68_10snps_1	0	0	0	0	0	0	0	0	0	0	0	0	7	0	0	0	0	0	0	0	0	0	9	0	0	18	0	0	0	0	0	14	0	0	50	0	0	0	0	0	55	0	16	0	0	0	0	15	0
HXT1_69to78_10snps_1	0	0	0	0	0	0	0	0	0	0	0	0	0	0	7	0	0	0	0	0	0	0	12	0	0	20	0	0	0	128	0	78	0	0	15	0	0	14	0	0	0	0	0	0	0	0	0	0	9
HXT1_79to88_10snps_1	0	0	0	0	0	0	0	0	0	0	0	8	0	0	0	0	0	0	0	0	0	0	0	0	0	14	0	6	0	22	0	0	0	0	0	16	0	7	0	0	28	0	0	0	0	0	0	0	0
HXT1_89to98_10snps_1	0	0	0	0	0	0	0	5	0	0	0	0	0	0	18	0	0	0	12	0	0	0	0	0	0	17	0	0	0	0	0	16	0	0	13	0	0	0	0	0	0	0	0	0	0	0	0	0	0
HXT1_99to108_10snps_1	0	0	0	0	0	0	0	0	0	0	0	0	0	0	0	0	0	0	0	0	0	0	0	0	0	0	0	0	0	10	0	0	0	0	0	14	0	0	0	0	35	0	12	0	0	0	0	0	0
HXT1_109to118_10snps_1	0	0	0	0	0	0	0	0	0	0	0	0	0	0	8	0	0	0	9	0	0	0	8	0	0	13	0	0	0	21	0	98	0	0	35	0	0	0	0	0	39	0	24	0	0	0	48	0	0
ILV3_1to8_10snps_1	0	0	0	17	0	0	0	0	0	0	0	0	0	12	114	17	0	0	6	0	0	0	0	0	0	0	0	0	0	0	0	0	0	0	0	0	0	0	0	0	0	0	0	0	0	0	0	0	0
ILV3_9to18_10snps_1	0	0	0	0	0	0	0	0	0	0	0	0	0	0	29	0	0	0	5	0	0	0	0	0	0	0	0	0	0	0	0	0	0	0	0	0	0	0	0	0	0	0	0	0	0	0	0	0	0
ILV3_19to28_10snps_1	0	0	0	0	0	0	0	0	0	0	0	0	0	0	21	0	0	0	0	0	0	0	0	0	0	0	0	0	0	0	0	0	0	0	0	0	0	0	0	0	0	0	0	0	0	0	0	0	0
ILV3_29to38_10snps_1	0	0	0	0	0	0	0	0	0	0	0	0	0	0	88	0	0	0	0	0	0	0	0	0	0	0	0	0	0	0	0	0	0	0	0	0	0	0	0	0	0	0	0	0	0	0	0	0	0
ILV3_39to48_10snps_1	0	0	0	5	0	0	0	0	0	0	0	0	0	0	0	0	0	0	0	0	0	0	0	0	0	0	0	0	0	0	0	0	0	0	0	0	0	0	0	0	0	0	0	0	0	0	0	0	0
ILV3_49to58_10snps_1	0	0	0	0	0	0	0	0	0	0	0	0	0	0	0	0	0	0	0	0	0	0	0	0	0	0	0	0	0	0	0	0	0	0	0	0	0	0	0	0	0	0	0	0	0	0	0	0	0
ILV3_59to68_10snps_1	0	0	0	0	0	0	0	0	0	0	0	0	0	0	23	0	0	0	0	0	0	0	0	0	0	0	0	0	0	0	0	0	0	0	0	0	0	0	0	0	0	0	0	0	0	18	0	0	0
ILV3_69to78_10snps_1	0	0	0	0	0	0	0	0	0	13	12	0	0	0	49	0	0	0	13	0	0	0	0	0	0	0	0	0	0	0	0	0	0	0	0	0	0	0	0	0	0	0	0	0	0	0	0	0	0
ILV3_79to88_10snps_1	0	0	0	8	0	0	0	0	0	0	0	0	0	0	0	0	0	0	0	0	0	0	0	0	0	0	0	0	0	0	0	0	0	0	0	0	0	49	0	0	0	0	0	0	0	0	0	0	0
ILV3_89to98_10snps_1	0	0	0	0	0	0	0	0	0	0	0	0	0	0	0	0	0	0	0	0	0	0	0	0	0	0	0	0	0	0	0	0	0	0	0	0	0	0	0	0	0	0	0	0	0	0	0	0	0
ILV3_99to108_10snps_1	0	0	0	0	0	0	0	0	0	0	0	0	11	0	0	0	0	18	0	0	0	0	0	0	0	0	0	0	0	0	0	0	0	0	0	0	0	0	0	0	0	0	0	0	0	0	0	0	0
ILV3_109to118_10snps_1	0	0	12	0	0	0	16	0	0	0	0	0	0	0	63	0	0	0	11	0	0	0	0	0	0	0	0	0	0	0	0	0	5	0	0	0	0	0	0	0	0	0	0	0	0	0	0	0	0
PFK2_1to8_10snps_1	0	0	0	0	0	0	24	0	0	0	0	0	0	0	0	0	0	14	0	0	0	0	0	0	0	0	0	15	0	0	0	0	0	0	0	0	0	0	0	0	0	0	0	0	0	0	0	0	0
PFK2_9to18_10snps_1	0	0	0	0	0	0	27	0	0	0	57	0	0	0	0	0	0	47	0	0	0	0	0	0	14	0	0	5	0	0	0	0	19	0	0	0	0	0	0	0	0	0	0	0	0	0	0	0	0
PFK2_19to28_10snps_1	0	0	0	0	0	0	10	0	0	0	0	0	0	0	0	0	0	0	0	0	0	0	0	0	11	0	0	0	0	0	0	0	0	0	0	0	0	0	0	0	0	0	0	0	0	0	0	0	0
PFK2_29to38_10snps_1	0	0	0	0	0	0	9	0	0	0	0	0	0	0	0	0	0	0	0	0	0	0	0	0	0	0	0	0	0	0	0	0	0	0	0	0	0	0	0	10	0	0	0	0	0	0	0	0	0
PFK2_39to48_10snps_1	0	0	0	0	0	0	0	0	0	0	0	0	0	0	0	0	0	0	0	0	0	0	0	0	0	0	0	0	0	0	0	0	0	0	0	0	0	0	0	0	0	0	0	0	0	0	0	0	0
PFK2_49to58_10snps_1	0	0	0	0	0	0	0	0	0	0	0	13	0	0	0	0	0	17	0	0	0	0	0	0	15	0	0	0	0	0	0	0	0	0	0	0	0	0	0	10	0	0	0	0	0	0	0	0	0
PFK2_59to68_10snps_1	0	0	0	0	0	0	21	0	0	0	0	0	0	0	0	0	0	0	0	0	0	0	0	0	20	0	0	0	0	0	0	0	14	0	0	0	0	0	0	0	0	0	0	0	0	0	0	0	0
PFK2_69to78_10snps_1	0	0	0	0	0	0	14	0	0	0	15	0	0	0	0	0	0	22	0	0	0	0	0	0	0	0	0	0	0	0	0	0	0	0	0	0	0	0	0	0	0	0	0	0	0	0	0	0	0
PFK2_79to88_10snps_1	0	0	0	0	0	0	0	0	0	0	0	0	0	0	0	0	0	0	0	0	0	0	0	0	0	0	0	0	0	0	0	0	0	0	0	0	0	0	0	0	0	0	0	0	0	36	0	0	0
PFK2_89to98_10snps_1	0	0	0	0	0	0	0	0	0	0	0	0	0	0	0	0	0	0	0	0	0	0	0	0	0	0	0	0	0	20	0	0	0	0	0	0	0	0	0	0	0	0	0	0	0	0	0	0	0
PFK2_99to108_10snps_1	0	0	0	0	0	0	0	0	0	0	0	0	0	0	0	0	0	0	0	0	0	0	0	0	21	0	0	0	0	0	0	0	0	0	0	0	0	0	0	0	0	0	0	0	10	0	0	0	0
PFK2_109to118_10snps_1	0	0	0	0	0	0	0	0	0	0	0	0	0	0	0	0	0	0	0	0	0	0	0	0	0	0	0	0	0	0	0	0	0	0	0	0	0	0	0	0	0	0	0	0	0	0	0	0	0
RPA12_1to8_10snps_1	0	0	0	0	0	0	0	0	0	0	0	0	0	0	0	0	0	0	0	0	0	0	0	0	0	0	0	0	0	0	0	0	0	0	0	0	0	0	0	0	0	0	0	0	0	0	0	0	0
RPA12_9to18_10snps_1	0	0	0	0	0	0	0	0	0	0	0	0	0	0	0	0	0	0	0	0	0	0	0	0	0	0	0	5	0	0	0	0	0	0	0	0	0	0	0	0	0	0	0	0	0	0	0	0	0
RPA12_19to28_10snps_1	0	0	0	0	0	0	0	0	0	0	0	0	0	0	0	0	0	0	0	0	0	0	0	0	0	0	0	0	0	0	0	0	0	0	0	0	0	0	0	0	0	0	0	0	0	0	14	0	0
RPA12_29to38_10snps_1	0	0	0	0	0	0	0	0	0	0	0	0	0	0	0	0	0	0	0	0	0	0	0	0	0	0	0	0	0	0	0	0	0	0	0	0	0	0	0	0	0	0	0	0	0	0	0	0	0
RPA12_39to48_10snps_1	0	0	0	0	0	0	0	0	0	0	0	0	0	0	0	0	0	0	0	0	0	0	0	0	0	0	0	22	0	0	0	0	0	0	0	0	0	0	0	0	0	0	0	0	0	0	0	0	0
RPA12_49to58_10snps_1	0	0	7	0	0	0	0	0	0	0	15	0	0	0	0	0	0	28	0	0	0	0	11	0	0	0	0	41	0	0	0	10	0	0	22	29	0	11	0	15	0	0	0	0	0	0	104	0	0
RPA12_59to68_10snps_1	0	0	0	0	0	0	0	0	0	0	0	0	0	0	0	0	0	0	0	0	0	0	0	0	0	0	0	0	0	0	0	0	0	0	5	0	0	0	0	0	0	0	0	0	0	0	0	0	0
RPA12_69to78_10snps_1	0	0	0	0	0	0	0	0	0	0	0	0	0	0	0	0	0	0	0	0	0	0	0	0	0	11	0	37	0	0	0	0	0	5	0	0	0	25	0	0	0	53	0	13	15	0	0	0	0
RPA12_79to88_10snps_1	0	0	0	0	0	0	0	0	0	0	0	0	0	0	0	0	0	0	0	0	0	0	8	0	0	0	0	0	0	0	0	0	0	0	0	0	0	0	20	0	0	0	0	0	0	14	27	0	0
RPA12_89to98_10snps_1	0	0	0	0	0	0	0	0	0	0	0	0	0	0	0	0	0	0	0	0	0	0	0	0	0	0	0	0	0	0	0	0	0	0	0	0	0	0	0	0	0	0	0	0	0	0	7	0	0
RPA12_99to108_10snps_1	0	0	0	0	0	0	0	0	0	0	0	0	0	0	0	0	0	0	0	0	0	0	0	0	0	0	0	0	0	0	0	0	0	0	0	0	0	0	0	0	0	0	0	0	0	0	0	0	0
RPA12_109to118_10snps_1	0	0	0	0	0	0	0	0	0	0	0	0	0	21	0	0	0	0	0	0	0	0	0	0	0	0	0	9	0	0	0	0	0	0	0	0	0	0	0	0	0	0	0	0	0	16	40	0	0
RPB10_1to8_10snps_1	0	0	0	0	0	0	0	18	0	0	13	0	0	0	0	0	0	0	0	0	0	0	0	0	0	0	0	0	0	0	0	0	0	0	0	0	0	0	0	0	0	0	0	0	0	0	0	0	0
RPB10_9to18_10snps_1	0	0	0	0	0	0	0	0	0	0	0	0	0	0	0	0	0	0	0	0	0	0	0	0	0	0	0	0	0	0	0	0	0	0	0	0	0	0	0	0	0	0	0	0	0	0	0	0	0
RPB10_19to28_10snps_1	0	0	0	0	0	0	0	0	0	0	0	0	0	0	0	0	0	0	0	0	0	0	0	0	0	0	0	0	0	0	0	0	0	0	0	0	0	0	0	0	0	0	0	0	0	0	0	0	0
RPB10_29to38_10snps_1	0	0	0	0	0	0	0	0	0	0	0	0	0	0	0	0	0	0	0	0	0	0	0	0	0	0	0	0	0	0	0	0	0	0	0	0	0	0	0	0	0	0	0	0	0	0	0	0	0
RPB10_39to48_10snps_1	0	0	0	0	0	0	0	0	0	0	0	0	0	0	0	0	0	0	0	0	0	0	0	0	0	0	0	0	0	0	0	0	0	0	0	0	0	0	0	0	0	0	0	0	0	0	0	0	0
RPB10_49to58_10snps_1	0	0	0	0	0	0	0	0	0	0	0	0	0	0	0	0	0	0	0	0	0	0	0	0	0	0	0	0	0	0	0	0	0	0	0	0	0	0	0	0	0	0	0	0	0	0	0	0	0
RPB10_59to68_10snps_1	0	0	0	0	0	0	0	0	0	0	0	0	0	0	0	0	0	0	0	0	0	0	0	0	0	0	0	0	0	0	0	0	0	0	0	0	0	0	0	0	0	0	0	0	0	0	0	0	0
RPB10_69to78_10snps_1	0	0	0	0	0	0	0	0	0	0	0	0	0	0	0	13	0	0	0	0	0	0	0	0	0	0	0	0	0	0	0	0	0	0	0	0	0	0	0	0	0	0	0	0	0	0	0	0	0
RPB10_79to88_10snps_1	0	0	0	0	0	0	0	0	0	0	0	0	0	0	0	0	0	0	0	0	0	0	0	0	0	0	0	0	0	0	0	0	0	0	0	0	0	0	0	0	0	0	0	0	0	0	0	0	0
RPB10_89to98_10snps_1	0	0	0	0	0	0	0	0	0	0	0	0	0	0	0	0	0	0	0	0	0	0	0	0	0	0	0	0	0	0	0	0	0	0	0	0	0	0	0	0	0	0	0	0	0	0	0	0	0
RPB10_99to108_10snps_1	0	0	0	0	0	0	0	0	0	0	0	0	0	0	0	0	0	0	0	0	0	0	0	0	0	0	0	0	0	0	0	0	0	0	0	0	0	0	0	0	0	0	0	0	0	0	0	0	0
RPB10_109to118_10snps_1	0	0	0	0	0	0	0	0	0	0	0	0	0	0	0	0	0	0	0	0	0	0	0	0	0	0	0	0	0	0	0	0	0	0	0	0	0	0	0	0	0	0	0	0	0	0	0	0	0
RPL14A_1to8_10snps_1	0	0	0	0	0	0	0	0	0	0	0	0	0	0	0	0	0	0	0	0	0	0	0	0	0	0	0	0	0	0	0	0	0	0	0	0	0	0	0	0	0	0	0	0	0	0	0	0	0
RPL14A_9to18_10snps_1	0	0	0	0	0	0	0	0	0	21	0	0	0	0	0	0	0	0	0	0	0	0	0	0	0	0	0	0	0	0	0	0	0	0	0	0	0	0	0	0	0	0	0	0	0	0	0	0	0
RPL14A_19to28_10snps_1	0	0	0	0	11	0	31	0	0	0	0	0	0	0	0	0	0	0	0	0	0	0	0	0	0	0	0	0	0	0	0	0	7	0	0	0	0	0	0	0	0	0	0	0	0	0	0	0	0
RPL14A_29to38_10snps_1	0	0	0	0	0	0	0	0	0	0	0	0	0	0	0	0	0	0	17	15	0	0	0	17	0	0	0	0	0	0	0	0	0	0	0	0	0	0	0	0	0	0	0	0	0	0	0	0	0
RPL14A_39to48_10snps_1	0	0	10	5	0	0	0	0	0	10	0	21	0	0	0	14	0	0	0	0	0	0	0	0	0	0	0	0	0	0	10	0	7	0	0	0	0	0	0	0	0	0	0	0	0	0	0	0	0
RPL14A_49to58_10snps_1	0	0	0	0	18	0	15	0	0	0	0	0	0	0	0	0	0	0	15	0	0	0	0	0	0	9	0	0	0	0	0	0	0	0	0	0	0	0	0	0	0	0	0	0	0	0	0	0	0
RPL14A_59to68_10snps_1	0	0	0	0	0	0	0	0	0	11	0	0	0	12	0	0	0	0	0	0	0	0	0	0	0	0	0	0	0	0	0	0	0	0	0	0	0	0	0	0	0	0	0	0	0	0	0	0	0
RPL14A_69to78_10snps_1	0	0	0	0	0	0	0	0	0	5	0	0	0	0	0	0	0	0	0	0	0	0	0	0	0	0	0	0	0	0	0	0	0	0	0	0	0	0	0	0	0	0	0	0	0	0	0	0	0
RPL14A_79to88_10snps_1	0	0	0	0	0	0	0	0	0	0	0	0	0	0	0	0	0	0	0	0	0	0	0	0	0	0	0	0	0	0	0	0	0	0	0	0	0	0	0	0	0	0	0	0	0	0	0	0	0
RPL14A_89to98_10snps_1	0	0	0	0	0	0	0	0	0	0	11	0	0	0	0	0	22	0	0	0	0	0	0	0	0	0	0	0	0	0	0	0	0	0	0	0	0	0	0	0	0	0	0	0	0	0	0	0	0
RPL14A_99to108_10snps_1	0	0	0	0	0	0	0	0	0	0	14	0	0	0	0	0	0	0	0	0	0	0	0	0	0	0	0	0	0	0	0	0	0	0	0	0	0	0	0	0	0	0	0	0	0	0	0	0	0
RPL14A_109to118_10snps_1	0	0	0	0	0	0	0	0	0	0	0	0	0	0	0	0	0	0	0	0	0	0	0	0	0	0	0	0	0	0	0	0	0	0	0	0	0	0	0	0	0	0	0	0	0	0	0	0	0
RPL28_1to8_10snps_1	0	0	0	0	0	0	0	0	11	14	0	47	0	0	0	107	0	0	10	35	0	0	0	0	0	0	0	10	0	0	0	13	0	0	0	0	0	0	0	0	0	0	0	0	0	0	0	0	0
RPL28_9to18_10snps_1	0	0	0	0	0	0	0	0	0	0	0	0	0	0	0	40	0	16	0	7	0	0	0	14	0	8	0	0	0	0	0	0	0	0	0	0	0	0	0	0	0	0	0	0	0	0	0	0	0
RPL28_19to28_10snps_1	0	0	0	0	0	0	0	0	0	0	0	11	0	0	0	42	0	0	38	21	0	0	0	24	0	0	0	0	0	0	0	0	0	0	0	0	0	0	0	0	0	0	0	0	0	0	0	0	0
RPL28_29to38_10snps_1	0	0	0	0	0	0	0	0	0	0	0	94	13	0	10	127	0	6	0	24	0	0	0	34	0	0	0	0	0	0	0	0	0	0	0	0	0	0	0	0	0	0	0	0	0	0	0	0	0
RPL28_39to48_10snps_1	0	0	0	0	0	0	0	0	0	0	0	11	0	0	0	228	0	0	11	21	0	0	0	15	0	0	0	0	0	0	0	0	0	0	0	0	0	0	0	0	0	0	0	0	0	0	0	21	0
RPL28_49to58_10snps_1	0	0	0	0	0	0	0	0	0	0	0	33	0	0	0	117	0	0	0	53	0	0	14	19	0	0	0	0	0	0	0	0	0	0	0	0	0	0	0	0	0	0	0	0	0	0	0	0	0
RPL28_59to68_10snps_1	0	0	0	0	0	0	0	18	0	0	0	94	0	0	0	93	14	0	0	15	0	0	17	6	0	0	0	0	0	0	20	0	0	0	0	0	0	0	0	0	0	0	0	0	0	0	0	0	27
RPL28_69to78_10snps_1	0	0	0	0	0	0	7	0	16	16	0	105	0	18	26	388	0	0	57	67	0	8	0	110	0	0	22	0	15	0	6	16	23	0	18	0	0	0	0	0	0	0	0	14	0	0	0	0	0
RPL28_79to88_10snps_1	0	0	0	0	11	0	0	0	0	0	0	0	0	0	0	155	0	0	5	130	0	0	0	10	42	6	0	0	0	33	15	0	0	9	0	0	0	0	0	0	0	0	0	0	0	18	0	0	0
RPL28_89to98_10snps_1	0	0	0	32	0	0	0	0	29	13	0	120	0	5	0	184	0	0	18	0	49	5	0	19	0	0	0	0	0	0	0	0	0	0	0	0	0	0	0	0	0	0	0	0	0	0	0	0	0
RPL28_99to108_10snps_1	0	0	0	17	0	0	6	0	0	0	39	0	0	0	0	28	0	26	0	0	0	6	0	0	0	0	0	0	0	0	0	0	0	0	0	0	0	0	0	0	0	0	0	0	0	0	0	0	0
RPL28_109to118_10snps_1	0	0	0	16	0	0	0	0	20	0	0	133	0	0	14	348	45	12	38	146	0	0	9	16	43	0	20	0	0	0	7	0	0	0	0	0	0	0	0	0	0	0	0	0	0	0	0	0	0
RPL3_1to8_10snps_1	0	0	0	25	0	0	0	35	0	0	19	0	0	0	0	17	0	0	0	16	0	76	0	0	11	0	0	0	0	33	0	0	0	0	0	6	0	0	0	0	0	0	0	0	0	0	0	0	0
RPL3_9to18_10snps_1	0	0	0	31	0	0	0	25	8	10	59	0	8	0	0	37	35	23	0	60	0	187	0	48	24	0	0	14	0	21	0	0	0	0	0	0	0	0	0	0	0	0	0	0	0	0	0	0	0
RPL3_19to28_10snps_1	0	0	0	0	0	0	0	44	0	0	10	0	0	0	0	6	0	0	21	35	0	82	0	17	109	0	0	26	12	8	0	0	0	0	0	0	0	0	0	0	0	0	0	0	0	0	0	0	0
RPL3_29to38_10snps_1	0	0	0	0	0	0	0	17	0	0	0	0	0	0	0	0	0	6	0	14	0	142	0	0	50	0	0	14	0	0	0	0	0	0	0	39	0	0	0	0	0	0	0	0	0	0	0	0	0
RPL3_39to48_10snps_1	0	0	0	0	0	0	0	0	0	0	0	0	0	0	0	0	0	0	0	0	0	0	0	0	0	0	0	0	0	0	0	0	0	0	0	0	0	0	0	0	0	0	0	0	0	0	0	0	0
RPL3_49to58_10snps_1	0	0	0	0	0	0	0	0	0	0	0	0	0	0	0	30	0	0	0	0	0	60	0	5	50	0	0	0	0	0	0	0	0	0	0	11	0	0	0	0	0	0	0	0	0	0	0	0	0
RPL3_59to68_10snps_1	0	0	0	0	0	0	0	0	0	0	0	0	0	0	0	0	0	0	0	0	0	0	0	0	0	0	0	10	0	0	0	0	0	0	0	0	0	0	0	0	0	0	0	0	0	0	0	0	0
RPL3_69to78_10snps_1	0	0	0	0	0	11	0	5	0	0	46	0	20	0	0	0	0	0	0	0	0	63	0	0	7	0	0	0	0	0	0	0	0	0	0	45	0	0	13	0	0	0	0	0	0	0	24	0	0
RPL3_79to88_10snps_1	0	0	0	0	0	0	0	0	0	0	0	0	0	28	0	0	0	0	0	0	0	45	0	0	46	0	0	0	9	65	0	0	0	0	22	0	0	0	0	0	0	0	0	0	0	0	0	0	0
RPL3_89to98_10snps_1	0	0	0	32	0	0	0	8	11	0	126	0	17	0	0	0	0	0	0	11	0	0	0	0	0	0	5	0	0	0	0	0	0	0	0	11	0	0	0	0	0	0	0	0	0	0	0	0	0
RPL3_99to108_10snps_1	0	0	5	0	0	0	0	0	0	0	0	0	15	0	0	0	0	0	43	0	7	173	0	0	19	0	0	0	0	0	0	0	0	0	0	24	0	0	0	0	0	0	0	0	0	0	0	0	0
RPL3_109to118_10snps_1	0	0	23	0	0	0	0	0	0	0	0	0	0	0	0	18	0	0	0	6	0	136	11	0	80	0	0	34	14	23	0	0	0	0	0	23	0	0	0	0	0	0	0	0	0	0	0	0	0
RPL35B_1to8_10snps_1	0	0	0	0	0	0	0	0	0	0	0	0	0	0	0	0	0	0	0	0	0	0	0	0	0	0	0	0	0	0	0	0	0	0	0	0	0	0	0	0	0	0	0	0	0	0	0	0	0
RPL35B_9to18_10snps_1	0	0	0	0	0	0	0	0	0	0	0	0	0	5	0	0	0	0	0	0	0	0	0	0	0	0	0	0	0	0	0	0	0	0	0	0	0	0	0	0	0	0	0	0	0	0	0	0	0
RPL35B_19to28_10snps_1	0	0	0	0	0	0	0	0	0	0	0	0	0	0	0	0	0	0	0	0	0	0	0	0	0	0	0	0	0	0	0	0	19	0	0	0	0	0	0	0	0	0	0	0	0	0	0	0	0
RPL35B_29to38_10snps_1	0	0	0	0	0	0	0	0	0	0	0	0	0	0	0	0	0	0	0	0	0	0	0	0	0	0	0	0	0	0	0	0	0	0	0	0	0	0	0	0	0	0	0	0	0	0	0	0	0
RPL35B_39to48_10snps_1	0	0	0	0	0	0	0	0	0	0	0	0	0	0	0	0	0	0	0	0	0	0	0	21	0	0	0	0	0	0	0	0	14	0	0	0	0	0	0	0	0	0	0	0	0	0	0	0	0
RPL35B_49to58_10snps_1	0	0	0	0	0	0	0	0	0	0	0	0	0	0	0	0	11	0	0	0	0	0	0	0	0	0	9	0	0	0	0	0	7	0	0	0	0	0	0	0	0	0	0	0	0	0	0	0	0
RPL35B_59to68_10snps_1	0	0	0	0	0	0	0	0	0	0	0	0	0	14	0	0	0	0	0	0	0	0	0	9	0	0	9	0	0	0	0	0	27	0	0	0	0	0	0	0	0	0	0	0	0	0	0	0	0
RPL35B_69to78_10snps_1	0	0	0	0	0	0	0	0	0	0	0	0	0	36	0	0	0	0	0	0	0	28	0	58	0	12	48	0	0	0	0	0	0	0	0	0	0	5	8	33	0	0	12	0	0	0	0	0	0
RPL35B_79to88_10snps_1	0	0	0	9	0	0	0	0	0	0	0	0	0	0	0	0	0	0	0	0	0	23	0	30	0	0	12	0	0	0	0	0	0	0	0	0	0	0	0	0	0	0	0	0	0	0	0	0	0
RPL35B_89to98_10snps_1	0	0	0	0	0	0	0	0	0	9	0	0	0	0	0	0	0	0	0	0	0	0	0	0	0	0	0	13	0	0	0	0	18	0	0	0	0	0	0	0	0	0	0	0	0	0	0	0	0
RPL35B_99to108_10snps_1	0	0	0	0	0	0	0	0	0	0	0	0	0	0	0	0	0	0	0	0	0	7	0	20	0	0	0	0	0	0	0	0	17	0	0	0	0	0	0	0	0	0	0	0	0	0	0	0	0
RPL35B_109to118_10snps_1	0	0	0	0	0	0	0	0	0	0	0	0	0	0	0	0	0	0	0	0	0	0	0	0	0	0	0	0	0	0	0	0	0	0	0	0	0	0	0	0	0	0	0	0	0	0	0	0	0
RPL43B_1to8_10snps_1	0	0	0	0	0	0	0	0	0	0	16	0	19	0	0	0	0	0	0	5	0	0	0	0	0	0	0	0	0	0	0	0	0	0	0	0	0	0	0	0	0	0	20	0	0	0	0	0	0
RPL43B_9to18_10snps_1	0	0	0	0	0	0	0	0	0	38	0	0	0	0	0	0	0	0	0	24	0	0	0	0	0	0	0	0	7	0	0	12	0	0	0	0	0	0	0	0	0	0	0	0	0	0	0	0	0
RPL43B_19to28_10snps_1	0	0	0	0	0	0	0	0	0	0	0	0	0	0	0	0	0	0	0	16	0	0	0	0	0	0	0	0	0	0	0	0	0	0	0	0	0	0	0	0	0	0	0	0	0	0	0	0	0
RPL43B_29to38_10snps_1	0	0	0	5	0	0	0	0	21	13	0	0	40	127	0	0	0	0	0	93	0	0	12	0	0	0	0	0	33	0	0	0	0	0	0	0	12	0	0	0	0	0	0	0	0	0	0	0	0
RPL43B_39to48_10snps_1	0	0	0	0	0	0	0	0	0	13	0	0	0	6	0	0	0	0	0	10	0	0	0	0	0	0	0	0	0	0	0	0	8	0	0	0	0	0	0	0	0	0	0	0	0	0	0	0	0
RPL43B_49to58_10snps_1	0	0	0	0	0	0	0	0	0	0	0	0	0	0	0	0	0	0	0	0	0	0	0	0	0	0	0	0	0	0	0	0	0	0	0	0	0	0	0	0	0	0	0	0	0	0	0	0	0
RPL43B_59to68_10snps_1	0	0	0	0	0	0	0	0	0	12	0	0	20	35	0	0	0	0	0	25	0	14	0	0	0	0	0	0	8	0	0	18	0	0	0	0	0	0	0	0	15	0	0	0	0	0	0	0	0
RPL43B_69to78_10snps_1	0	0	0	0	0	0	0	0	0	0	0	0	0	0	0	0	0	0	0	0	0	0	0	0	0	0	0	0	0	0	0	0	0	0	0	0	0	0	0	0	0	0	0	0	0	0	0	0	0
RPL43B_79to88_10snps_1	0	0	0	0	0	0	19	0	0	19	0	0	13	39	0	0	0	0	0	67	0	0	6	0	0	0	19	0	7	0	0	0	0	0	0	17	0	0	0	0	0	0	0	0	0	0	0	0	0
RPL43B_89to98_10snps_1	0	0	0	0	0	0	0	0	0	0	0	0	0	0	0	0	0	0	0	0	0	0	0	0	0	0	0	0	0	0	0	0	0	0	0	0	0	0	0	0	0	0	0	0	0	0	0	0	0
RPL43B_99to108_10snps_1	0	0	0	0	0	0	0	0	0	0	0	0	0	0	0	0	0	0	0	0	0	0	0	0	0	0	0	0	0	0	0	0	0	0	0	0	0	0	0	0	0	0	0	0	16	0	0	0	0
RPL43B_109to118_10snps_1	0	0	0	0	0	0	0	0	0	23	0	0	11	92	0	0	0	34	0	109	0	10	48	0	0	0	37	0	41	0	0	22	0	0	0	0	0	0	0	0	0	0	0	0	0	0	0	0	0
RPL4A_1to8_10snps_1	0	0	0	0	0	0	11	0	0	0	0	0	0	0	0	82	0	0	0	0	0	0	0	0	0	0	0	0	0	0	0	0	0	0	0	0	0	0	0	0	0	0	0	0	0	0	0	0	0
RPL4A_9to18_10snps_1	0	0	0	0	0	12	0	0	0	0	0	0	0	0	0	25	0	0	0	0	0	0	20	21	0	0	0	0	0	0	0	0	0	0	0	0	0	0	0	0	0	0	0	0	0	18	0	0	0
RPL4A_19to28_10snps_1	0	0	0	0	0	0	0	0	0	0	0	0	0	0	0	38	0	0	0	0	0	0	0	0	0	0	0	0	0	0	0	0	0	0	0	0	0	0	0	0	0	0	0	0	0	0	0	0	0
RPL4A_29to38_10snps_1	0	0	0	0	0	9	0	0	0	0	0	0	0	0	0	64	0	0	0	0	13	0	0	0	0	0	0	0	0	0	0	0	0	0	0	0	0	0	0	0	0	0	0	0	0	0	0	0	0
RPL4A_39to48_10snps_1	0	0	0	0	0	0	0	0	18	19	0	0	17	0	0	150	0	0	0	16	0	0	0	26	0	0	0	0	0	0	0	0	0	0	0	0	0	0	0	0	0	0	0	0	0	0	0	0	0
RPL4A_49to58_10snps_1	0	0	0	0	0	0	0	0	0	0	0	0	0	0	0	15	0	0	0	0	0	0	0	12	0	0	0	0	0	0	0	0	0	0	0	0	0	0	0	0	0	0	0	0	0	0	0	0	0
RPL4A_59to68_10snps_1	0	0	0	0	0	0	0	0	0	0	0	0	0	0	0	56	0	19	0	0	14	0	0	43	0	0	0	0	0	0	0	0	0	0	0	0	0	0	0	0	0	0	0	0	0	0	0	0	0
RPL4A_69to78_10snps_1	0	0	0	0	0	0	0	0	7	17	0	0	0	0	0	179	0	0	0	0	16	0	0	52	0	0	0	0	0	0	0	0	0	0	0	0	0	0	0	0	0	0	0	0	0	0	0	0	0
RPL4A_79to88_10snps_1	0	0	0	0	0	0	5	0	0	0	0	0	0	0	0	21	0	0	0	0	0	0	0	42	0	0	0	0	0	0	26	0	0	0	0	0	0	0	0	0	0	0	0	0	0	0	0	0	0
RPL4A_89to98_10snps_1	0	0	0	0	0	23	0	0	8	26	0	0	0	0	0	89	0	0	0	0	0	24	0	0	11	0	0	6	0	0	0	0	0	0	0	0	0	0	0	15	0	0	0	0	0	0	0	0	0
RPL4A_99to108_10snps_1	0	0	0	0	0	29	0	0	0	0	0	0	0	0	0	0	0	13	0	0	0	0	0	34	0	0	0	0	0	0	0	0	0	0	0	0	0	0	0	0	0	0	0	0	0	0	0	0	0
RPL4A_109to118_10snps_1	0	0	0	0	0	0	0	36	0	0	0	0	0	0	0	96	0	0	0	0	0	0	0	60	0	0	0	0	0	0	0	0	0	0	0	0	0	0	0	0	0	0	0	0	0	0	0	0	0
RPL5_1to8_10snps_1	0	0	0	0	0	0	0	0	0	0	0	0	0	0	0	0	0	0	6	0	0	14	0	0	0	0	0	0	0	0	11	0	0	17	0	0	0	0	0	0	0	0	0	0	0	0	0	0	0
RPL5_9to18_10snps_1	0	0	0	21	0	0	0	0	8	14	0	0	0	0	13	30	0	0	311	0	0	51	0	0	14	0	0	0	16	0	7	0	0	67	0	0	0	0	0	0	0	0	0	0	0	0	0	0	0
RPL5_19to28_10snps_1	0	0	0	0	0	0	0	0	0	0	0	0	0	0	0	0	0	0	0	0	0	5	0	0	0	9	0	0	0	0	18	0	0	0	0	0	0	0	0	0	0	0	0	0	0	0	0	0	0
RPL5_29to38_10snps_1	0	0	0	0	0	0	0	0	0	0	0	0	0	0	0	24	0	9	65	0	0	72	0	0	21	0	0	0	0	0	0	0	0	0	0	0	0	0	0	0	0	0	0	0	0	0	0	0	0
RPL5_39to48_10snps_1	0	0	0	0	0	0	0	0	0	0	0	0	0	0	0	15	0	6	8	0	0	27	0	0	0	0	0	0	19	0	0	0	0	0	0	0	0	0	0	0	0	0	0	0	0	0	0	0	0
RPL5_49to58_10snps_1	0	0	0	0	0	0	0	0	0	0	0	0	0	0	0	0	0	0	40	0	0	16	0	0	0	0	0	0	0	0	0	0	0	10	0	0	0	0	14	0	12	0	0	0	0	0	0	0	0
RPL5_59to68_10snps_1	0	0	0	15	0	0	0	0	0	0	0	0	0	12	0	0	0	0	30	0	0	7	0	0	0	0	0	0	0	0	0	0	0	0	0	0	0	0	0	0	0	0	0	0	0	0	0	0	0
RPL5_69to78_10snps_1	0	0	0	0	0	0	0	0	0	0	0	0	0	0	0	0	0	0	22	0	0	32	0	0	0	0	0	0	0	0	0	11	0	0	0	0	0	0	25	0	0	0	0	0	0	0	0	0	0
RPL5_79to88_10snps_1	0	0	0	13	0	0	0	0	0	0	0	0	0	0	0	0	0	0	38	0	0	30	0	0	0	0	0	0	0	0	0	0	0	0	0	0	0	0	0	0	0	0	0	0	0	0	0	0	0
RPL5_89to98_10snps_1	0	0	0	0	0	0	0	0	0	0	0	0	0	0	0	5	0	0	10	0	0	0	0	0	0	16	0	15	0	0	0	0	0	0	0	0	0	0	0	0	0	0	0	0	0	0	0	0	0
RPL5_99to108_10snps_1	0	0	0	0	0	0	0	0	0	0	0	0	0	0	0	0	0	0	0	40	0	26	0	0	0	0	0	0	0	0	0	0	0	0	0	0	0	0	0	0	0	0	0	0	0	0	0	0	0
RPL5_109to118_10snps_1	0	0	0	0	0	0	0	0	0	0	0	0	0	0	0	0	0	0	0	0	0	0	0	0	0	0	0	0	0	0	0	0	0	0	0	0	0	0	0	0	0	0	0	0	0	0	0	0	0
RPL8A_1to8_10snps_1	0	0	0	0	0	0	0	0	0	0	0	0	0	0	0	0	0	0	0	0	0	0	0	0	0	0	0	0	0	0	0	0	0	0	0	0	0	0	0	0	0	0	0	0	0	0	0	0	0
RPL8A_9to18_10snps_1	0	0	0	5	0	0	14	40	0	0	0	236	6	10	0	0	42	0	0	96	0	25	0	0	10	0	0	0	0	0	0	0	0	0	0	0	0	0	8	0	0	0	0	0	0	0	0	0	12
RPL8A_19to28_10snps_1	0	0	0	0	0	0	0	5	0	0	0	45	0	0	0	0	20	0	0	0	0	0	0	0	0	0	0	0	0	0	0	0	0	0	0	0	0	0	0	0	0	0	0	0	0	0	0	0	0
RPL8A_29to38_10snps_1	0	0	27	0	18	0	0	32	0	0	10	169	0	12	0	20	65	0	0	151	0	0	0	0	0	0	0	12	0	0	0	0	0	0	0	0	0	0	0	0	0	18	0	0	0	0	0	0	21
RPL8A_39to48_10snps_1	0	0	0	0	0	0	0	5	0	0	0	108	10	0	17	0	39	0	0	80	0	14	0	0	0	0	0	23	0	0	0	0	0	0	16	0	0	0	0	0	0	0	0	0	0	0	0	0	0
RPL8A_49to58_10snps_1	0	0	0	0	0	0	0	0	0	0	0	12	0	0	0	0	0	0	0	23	0	0	0	0	0	0	0	0	0	0	0	0	0	0	0	0	0	0	0	0	0	0	0	0	0	0	0	0	0
RPL8A_59to68_10snps_1	0	0	0	0	0	0	0	33	0	0	0	25	0	0	0	8	16	0	0	0	0	0	0	0	0	0	0	0	0	0	0	0	0	0	0	0	0	0	0	0	0	0	0	0	0	0	0	0	0
RPL8A_69to78_10snps_1	0	0	0	0	0	0	5	57	0	0	0	82	0	9	0	0	0	0	0	10	0	0	0	0	0	0	0	0	0	0	0	30	0	0	12	0	0	0	0	0	9	0	0	0	0	0	0	0	0
RPL8A_79to88_10snps_1	0	0	0	5	0	0	0	6	0	0	0	23	0	0	0	0	5	0	0	77	0	0	0	0	39	0	0	37	0	0	0	0	0	12	0	8	0	0	0	27	0	0	0	0	0	0	0	0	0
RPL8A_89to98_10snps_1	0	0	0	0	0	0	0	0	0	0	0	0	0	0	0	0	0	0	0	0	0	0	0	0	0	0	0	0	0	0	0	0	0	0	0	0	0	0	0	0	0	0	0	0	0	0	0	0	0
RPL8A_99to108_10snps_1	0	0	0	0	0	0	0	19	0	0	0	0	0	0	0	0	0	0	0	0	0	0	0	0	0	0	0	6	0	0	0	0	0	0	0	0	0	0	0	0	0	0	0	0	0	0	0	0	0
RPL8A_109to118_10snps_1	0	0	0	0	0	0	0	0	0	0	0	0	0	0	0	0	0	0	0	52	0	0	0	0	0	0	0	0	0	0	0	0	0	0	0	0	0	0	0	0	0	0	0	0	0	0	0	0	0
RPT2_1to8_10snps_1	0	0	0	0	0	0	0	0	0	0	0	0	0	0	0	0	0	0	0	0	0	0	0	0	0	0	0	0	0	0	0	0	0	0	0	0	0	11	0	0	0	0	7	0	0	0	14	0	0
RPT2_9to18_10snps_1	0	0	0	0	0	0	0	0	0	0	0	0	0	0	0	0	0	0	0	0	0	0	0	0	0	0	0	0	0	0	0	0	0	0	0	0	0	0	0	0	0	0	0	0	0	0	0	0	0
RPT2_19to28_10snps_1	0	0	0	0	0	0	0	0	0	0	0	0	0	0	0	0	0	0	0	0	0	0	0	0	0	0	0	0	0	0	0	0	0	0	0	0	0	0	0	0	0	0	0	0	0	0	0	0	0
RPT2_29to38_10snps_1	0	0	0	0	0	15	0	0	0	0	0	0	0	0	0	0	0	0	0	0	0	0	0	0	15	0	0	0	0	0	0	0	0	0	0	0	0	12	0	0	0	0	0	0	0	0	0	0	0
RPT2_39to48_10snps_1	0	0	0	0	0	0	0	0	0	0	0	0	0	0	0	0	0	0	0	0	0	0	0	0	0	0	0	0	0	0	0	0	0	0	0	0	0	0	0	0	0	0	0	0	0	0	0	0	0
RPT2_49to58_10snps_1	0	0	0	0	0	0	0	0	0	0	0	0	0	0	0	0	0	0	0	0	0	0	0	0	0	0	0	0	0	0	0	0	0	0	0	0	0	0	0	0	0	0	0	0	0	0	0	0	0
RPT2_59to68_10snps_1	0	0	25	0	0	0	0	0	0	0	0	0	0	0	0	0	0	0	0	0	0	0	0	0	0	0	0	0	0	0	0	0	0	0	0	0	0	5	0	0	0	0	9	0	0	0	0	0	7
RPT2_69to78_10snps_1	0	0	0	0	0	0	0	0	0	0	0	0	0	0	0	0	0	0	0	0	0	0	0	0	0	0	0	0	0	0	0	0	0	0	0	0	0	0	0	0	0	0	0	0	0	0	0	0	0
RPT2_79to88_10snps_1	0	0	0	0	0	0	0	0	0	0	0	0	0	0	0	0	0	0	0	0	0	0	0	0	0	0	0	0	0	0	0	0	0	0	0	0	0	0	0	0	0	0	0	0	0	0	0	0	0
RPT2_89to98_10snps_1	0	0	0	0	0	0	0	0	0	0	0	0	0	0	0	0	0	0	0	0	0	0	0	0	0	0	0	0	0	0	0	0	0	0	0	0	0	0	0	0	0	0	0	0	0	0	0	0	0
RPT2_99to108_10snps_1	0	0	0	0	0	0	0	0	0	0	0	0	0	0	0	0	0	0	0	0	0	0	0	0	0	0	0	0	0	0	0	0	0	0	0	0	0	0	0	0	0	0	0	0	0	0	0	0	0
RPT2_109to118_10snps_1	0	0	0	0	0	0	0	0	0	0	0	0	0	0	5	0	0	0	0	0	0	0	0	0	0	0	0	0	0	0	0	0	0	0	0	0	16	0	0	0	0	0	0	0	0	0	0	0	0
TIF11_1to8_10snps_1	0	0	0	0	0	0	0	0	0	0	0	0	0	0	0	0	0	16	0	0	0	0	0	0	6	0	0	33	0	0	0	0	0	0	0	0	0	0	0	0	0	25	0	0	0	0	0	0	15
TIF11_9to18_10snps_1	0	0	0	0	0	0	0	0	0	24	0	0	11	0	0	0	0	0	0	0	0	0	0	0	63	0	0	19	0	0	0	0	0	15	0	0	0	0	0	21	0	0	0	0	0	0	0	0	19
TIF11_19to28_10snps_1	0	0	0	0	0	0	0	0	0	76	0	0	37	0	21	0	0	0	0	0	0	0	0	0	24	0	0	11	0	0	0	0	0	0	0	0	0	0	0	9	0	0	0	0	0	0	0	0	20
TIF11_29to38_10snps_1	0	0	7	0	0	0	0	0	0	86	0	0	45	0	0	0	14	16	0	0	0	0	0	0	32	0	0	35	0	0	0	0	0	0	0	5	0	0	0	9	0	23	0	0	0	0	0	0	29
TIF11_39to48_10snps_1	0	0	7	0	0	0	0	0	0	27	0	0	0	0	0	0	53	0	0	0	0	0	0	11	10	0	0	16	0	0	0	0	0	0	0	0	0	0	0	8	0	0	0	0	0	0	0	0	14
TIF11_49to58_10snps_1	0	0	12	0	0	0	0	0	0	56	0	0	70	0	0	0	26	0	0	0	0	5	0	0	26	0	0	19	0	0	0	0	26	0	0	6	0	0	15	0	0	0	0	0	0	0	0	0	0
TIF11_59to68_10snps_1	0	0	0	0	0	0	0	0	0	0	0	0	0	0	0	0	12	0	0	0	0	7	0	11	19	0	0	0	0	0	0	0	0	0	0	0	0	0	0	0	0	0	0	0	0	0	0	0	0
TIF11_69to78_10snps_1	0	0	0	0	0	0	0	0	0	19	0	0	0	0	0	0	6	0	0	0	0	0	0	0	0	0	0	0	0	0	0	0	0	0	0	0	0	0	0	0	0	0	0	0	0	0	0	0	0
TIF11_79to88_10snps_1	0	0	0	0	0	0	0	6	0	20	0	0	0	0	0	0	0	0	0	0	0	0	0	0	0	0	0	0	0	0	0	0	0	0	0	0	0	0	0	0	0	0	0	0	0	0	0	0	0
TIF11_89to98_10snps_1	0	0	0	0	0	0	0	0	10	15	0	0	17	0	16	0	0	0	0	0	0	0	24	0	10	0	0	0	0	0	0	0	0	0	0	0	0	0	0	10	0	0	0	0	0	0	0	0	0
TIF11_99to108_10snps_1	0	0	0	0	0	0	0	0	0	0	0	0	0	0	0	0	0	0	0	0	0	0	0	0	0	0	0	0	0	0	0	0	0	0	0	0	0	0	0	0	0	0	0	0	0	0	0	0	0
TIF11_109to118_10snps_1	0	0	0	0	0	0	0	0	0	0	0	0	0	0	0	0	0	0	0	0	0	0	0	0	0	0	0	0	0	0	0	0	0	0	0	0	0	0	0	0	0	0	0	0	0	0	0	0	0
VMA13_1to8_10snps_1	0	0	0	0	0	0	0	0	0	0	0	0	0	0	0	0	0	0	0	0	0	0	0	0	0	0	0	0	0	0	0	0	0	0	0	0	0	0	0	0	0	0	0	0	0	0	0	0	0
VMA13_9to18_10snps_1	0	0	0	0	0	0	0	0	0	0	0	0	0	0	0	0	0	0	31	0	17	0	0	0	0	0	24	0	23	0	14	0	0	0	0	0	0	0	0	0	0	91	0	0	0	29	7	18	24
VMA13_19to28_10snps_1	0	0	0	0	0	0	0	0	0	0	0	0	0	0	0	0	0	0	10	0	0	0	16	0	0	0	11	0	22	0	0	0	0	0	0	0	0	0	0	0	0	0	0	0	0	0	19	0	0
VMA13_29to38_10snps_1	0	0	0	0	0	0	0	0	0	0	0	0	0	0	0	0	0	0	22	0	0	0	0	0	0	6	44	0	58	0	0	0	0	0	0	5	0	0	6	10	0	13	0	0	0	27	21	0	0
VMA13_39to48_10snps_1	0	0	0	0	0	0	0	0	0	0	0	0	0	0	0	0	0	0	0	0	0	0	0	0	0	0	16	0	0	0	0	5	0	0	0	0	0	0	0	0	0	7	0	0	0	21	13	0	0
VMA13_49to58_10snps_1	0	0	0	0	0	0	0	0	0	0	0	0	0	0	0	0	0	0	0	0	0	0	0	0	0	0	12	0	12	0	0	0	0	0	0	0	0	0	0	0	0	40	0	0	0	10	0	0	0
VMA13_59to68_10snps_1	0	0	0	0	0	0	0	0	0	0	0	0	0	0	0	0	0	0	0	0	0	0	0	0	0	0	0	0	0	0	0	0	0	0	0	0	0	0	0	0	0	0	0	0	0	0	0	0	0
VMA13_69to78_10snps_1	0	0	0	0	0	0	0	0	0	0	0	0	0	0	0	0	0	0	0	0	0	0	0	0	0	0	0	0	0	0	0	0	0	0	0	0	0	0	0	0	0	0	0	0	0	0	0	0	0
VMA13_79to88_10snps_1	0	0	0	0	0	0	0	0	0	0	0	0	6	0	0	0	0	0	39	0	0	0	0	0	0	21	0	0	0	0	0	0	0	24	0	0	0	0	0	0	0	20	0	0	0	0	0	0	0
VMA13_89to98_10snps_1	0	0	0	0	0	0	0	0	0	0	0	0	0	0	0	0	0	0	17	0	0	0	0	0	0	0	0	0	0	0	0	0	0	0	0	0	0	0	0	0	0	0	0	0	0	0	20	0	0
VMA13_99to108_10snps_1	0	0	0	0	0	0	0	0	0	0	0	0	0	0	19	0	0	0	0	0	15	0	0	0	0	0	30	0	8	0	0	0	0	0	0	0	0	0	0	0	6	39	0	0	0	21	0	0	0
VMA13_109to118_10snps_1	0	0	0	0	0	0	0	0	0	0	0	0	0	0	0	0	0	0	0	0	0	0	0	0	0	0	0	0	0	0	0	0	0	0	0	0	0	0	0	0	0	0	0	0	0	0	0	0	0
snR14_1to8_10snps_1	0	0	0	0	0	0	0	0	0	0	14	0	0	0	0	0	65	0	0	0	0	0	0	0	0	0	0	0	0	0	0	0	0	0	0	0	0	0	0	0	0	0	0	0	0	0	0	0	0
snR14_9to18_10snps_1	0	0	0	0	0	0	0	0	0	0	15	0	0	0	0	0	57	0	0	0	0	0	0	0	22	0	0	0	0	0	0	0	0	0	0	0	0	0	0	0	0	0	0	0	0	0	0	0	0
snR14_19to28_10snps_1	0	0	0	0	0	0	0	0	0	0	11	0	0	7	0	0	13	0	0	0	0	0	0	0	0	0	0	0	0	0	0	0	0	0	0	0	0	0	0	0	0	0	0	0	0	0	0	0	0
snR14_29to38_10snps_1	0	0	0	0	0	0	0	0	15	0	0	0	0	0	0	0	22	0	0	0	0	0	0	0	17	0	0	0	0	0	0	0	0	0	0	0	0	0	0	0	0	0	0	0	0	0	0	0	0
snR14_39to48_10snps_1	0	0	0	0	0	0	0	0	0	0	0	0	0	0	0	0	14	0	0	0	0	0	0	0	0	0	0	0	0	0	0	0	0	0	0	0	0	0	0	0	0	0	0	0	0	0	0	0	0
snR14_49to58_10snps_1	0	0	0	0	0	0	0	0	0	0	0	0	0	0	0	0	0	0	0	0	0	0	0	0	0	0	0	0	0	0	0	0	0	0	0	0	0	0	0	0	0	0	0	0	0	0	0	0	0
snR14_59to68_10snps_1	0	0	0	0	0	0	0	0	0	0	0	0	0	0	0	0	0	0	0	0	0	0	0	0	0	0	0	0	0	0	0	0	0	0	0	0	0	0	0	0	0	0	0	0	0	0	0	0	0
snR14_69to78_10snps_1	0	0	0	0	0	0	0	0	0	0	14	0	0	0	0	0	0	0	0	0	0	0	0	0	0	0	0	0	0	0	0	0	0	0	0	0	0	0	0	0	0	0	8	0	0	0	0	0	0
snR14_79to88_10snps_1	0	0	0	0	0	0	0	0	0	0	0	0	0	0	0	0	13	0	0	0	0	0	0	0	0	0	0	0	0	0	0	0	25	0	0	0	0	0	0	0	0	0	0	0	0	0	0	0	0
snR14_89to98_10snps_1	0	0	0	0	0	0	11	0	0	0	29	0	0	0	0	0	6	0	0	0	0	0	15	0	0	0	0	0	0	0	0	0	0	0	0	0	0	0	0	0	0	0	0	0	0	0	0	0	0
snR14_99to108_10snps_1	0	0	0	0	0	0	0	0	0	0	0	0	0	0	0	9	0	0	0	0	0	0	0	0	0	0	0	0	0	0	0	0	0	0	0	0	0	0	0	0	0	0	0	0	0	0	0	0	0
snR14_109to118_10snps_1	0	0	0	0	0	0	0	0	0	0	0	0	0	0	0	0	0	0	0	0	0	0	0	0	0	0	0	0	0	0	0	0	0	0	0	0	0	0	0	0	0	0	0	0	0	0	0	0	0
snR14_1to28_30snps_1	0	0	0	0	0	0	0	0	0	0	0	0	0	0	0	0	0	0	0	0	0	0	0	0	0	0	0	0	0	0	0	0	0	0	0	0	0	0	0	0	0	0	0	0	0	0	0	0	0
snR14_1to28_30snps_2	0	0	0	0	0	0	0	0	0	0	0	0	0	0	0	0	27	0	0	0	0	0	0	0	0	0	0	0	0	0	0	0	0	0	0	0	0	0	0	0	0	0	0	0	0	0	0	0	0
snR14_29to58_30snps_1	0	0	0	0	0	0	0	0	0	0	0	0	0	0	0	0	63	0	0	0	0	0	0	0	0	0	0	0	0	0	0	0	0	0	0	0	0	0	0	0	0	0	0	0	0	0	0	0	0
snR14_29to58_30snps_2	0	0	0	0	0	0	0	0	0	0	0	0	0	17	0	0	6	0	0	0	0	0	0	0	0	0	0	0	0	0	0	0	0	0	0	0	0	0	0	0	0	0	0	0	0	0	0	0	0
snR14_59to88_30snps_1	0	0	0	0	0	0	0	0	0	0	0	0	0	0	0	0	0	0	0	0	0	0	0	0	0	0	0	0	0	0	0	0	0	0	0	0	14	0	0	0	0	0	0	0	0	0	0	0	0
snR14_59to88_30snps_2	0	0	0	0	0	0	0	0	0	0	0	0	0	0	0	0	0	0	0	0	0	0	0	0	0	0	0	0	0	0	0	0	0	0	0	0	0	0	0	0	0	0	0	0	0	0	0	0	0
snR14_89to118_30snps_1	0	0	0	0	0	0	0	0	0	7	0	0	0	21	25	204	0	0	0	0	14	0	16	0	0	0	0	17	0	17	0	0	0	0	0	0	0	0	0	0	0	0	0	0	0	0	0	0	0
snR14_89to118_30snps_2	0	0	0	0	0	0	0	0	0	0	26	0	10	0	0	0	0	38	0	0	16	7	14	0	21	0	0	0	0	9	0	0	0	0	0	0	0	0	0	0	0	0	0	0	0	0	0	0	0
TDH3_1to28_30snps_1	0	0	0	0	0	0	0	0	0	0	0	0	8	0	0	0	0	0	0	0	13	0	0	0	0	0	0	0	0	0	0	0	0	0	0	0	0	0	19	0	0	0	0	0	0	0	0	0	0
TDH3_1to28_30snps_2	0	0	0	0	0	20	0	0	0	0	29	0	48	0	0	0	7	0	0	0	10	0	0	0	0	0	0	0	0	0	0	0	0	0	0	0	0	0	49	13	0	0	0	0	0	0	0	0	0
TDH3_29to58_30snps_1	0	0	0	0	0	0	0	0	0	0	0	0	0	0	0	0	0	0	0	0	0	0	0	0	0	0	0	0	0	0	0	0	0	0	0	0	0	0	0	0	0	0	0	0	0	0	0	0	0
TDH3_29to58_30snps_2	0	0	0	0	0	0	0	0	0	0	0	0	27	0	0	0	0	0	0	0	0	0	0	0	0	0	0	0	0	0	0	0	0	0	0	0	0	0	0	0	0	0	0	0	0	0	0	0	0
TDH3_59to88_30snps_1	0	0	0	0	0	0	0	0	0	0	0	0	0	0	0	0	0	0	0	0	0	0	0	0	0	0	0	0	0	0	0	0	0	0	0	0	0	0	0	0	0	0	0	0	0	0	0	0	0
TDH3_59to88_30snps_2	0	0	0	0	0	0	8	0	0	0	0	0	25	0	32	0	0	0	0	0	0	0	0	0	0	0	0	0	0	0	0	0	0	0	0	0	0	0	0	0	0	0	0	0	0	0	0	0	0
TDH3_89to118_30snps_1	0	0	0	0	0	0	0	0	0	0	0	0	0	0	0	0	0	0	0	0	0	0	0	0	0	0	0	0	0	0	0	0	0	0	0	0	0	0	7	0	0	0	0	0	0	0	0	0	0
TDH3_89to118_30snps_2	0	0	0	0	0	0	0	0	0	0	0	0	0	0	0	0	0	0	0	0	0	22	0	0	0	0	0	0	0	0	0	0	0	0	0	0	0	0	64	0	0	0	0	0	0	0	0	0	0
GAL7_1to28_30snps_1	0	0	32	0	0	0	0	0	0	0	0	5	0	0	0	0	0	0	0	67	0	0	0	0	0	10	0	0	7	0	0	0	0	0	0	0	0	0	0	0	0	0	0	0	0	0	0	0	0
GAL7_1to28_30snps_2	0	0	0	0	0	0	0	0	0	0	0	0	0	0	0	0	0	0	0	5	0	0	0	0	0	0	0	0	21	0	0	8	0	0	0	0	0	0	0	0	0	0	0	0	0	0	0	0	0
GAL7_29to58_30snps_1	0	0	0	0	0	0	0	0	0	0	0	0	0	0	0	0	0	0	0	0	0	0	0	0	0	0	0	0	0	0	0	0	0	0	0	0	0	0	0	0	0	0	0	0	0	0	0	0	0
GAL7_29to58_30snps_2	0	0	0	0	0	0	11	0	0	0	0	0	0	0	0	0	0	0	0	0	0	0	0	0	0	0	0	0	0	0	0	0	0	0	0	0	0	0	0	0	0	0	0	0	0	0	0	0	0
[truncated: 4,935 more rows]
[truncated: 51 more columns]

## Sheet: Supp. Table 3
Name	Core promoter activity [a.u.]	Promoter Activity [a.u.] (Zeevi et al., 2014)
RPL10	12.6395	2.8447
[truncated: 237 more rows]

## Sheet: Supp. Table 4
Name	Core promoter activity [a.u.]	Promoter Activity [a.u.] (Keren et al., 2013)
[truncated: 133 more rows]

[truncated: 1 more sheets: Supp. Table 5]
